# Supplementary material for: Allosteric cooperation in β-lactam binding to a non-classical transpeptidase
Source: eLife. 2022 Apr 27;11:e73055. doi: 10.7554/eLife.73055 (PMC9094749; doi:10.7554/eLife.73055)
Supplement: Figure 1—source data 1. [file elife-73055-fig1-data1.xlsx]

## Sheet: Sheet1
Raw data on ThermFluor study of PG substrate binding with Wild-type and mutants (Figure 1C)
	Temperature	0 mM	0.046875 mM	0.09375 mM	0.1875 mM	0.375 mM	0.75 mM	1.50 mM	3.0 mM
	28	2.01	0.31	-0.13	-0.22	2.75	2.84	6.91	3.46
	28.5	4.36	0.67	-0.27	-0.48	5.97	6.14	14.97	7.5
	29	4.02	0.61	-0.25	-0.44	5.51	5.67	13.82	6.92
	29.5	4.02	0.61	-0.25	-0.44	5.51	5.67	13.82	6.92
	30	4.02	0.61	-0.25	-0.44	5.51	5.67	13.82	6.92
	30.5	4	0.63	-0.29	-0.47	5.51	5.6	13.69	6.71
	31	4.13	0.52	-0.1	-0.29	5.48	6.03	14.49	7.99
	31.5	4.4	0.31	0.82	-0.01	5.65	6.88	15.75	10.65
	32	5.15	0.53	1.68	0.33	6.67	7.61	16.7	13.6
	32.5	5.99	0.71	2.11	1.25	7.88	8.31	18.18	16.64
	33	6.7	0.95	2.75	1.89	8.71	8.21	19.08	19.41
	33.5	7.28	1.03	3.12	1.71	9.02	7.33	18.78	21.18
	34	6.81	0.69	2.65	1.25	8.26	6.38	17.58	20.64
	34.5	5.49	0.17	1.76	0.94	6.89	5.35	15.72	18.39
	35	3.87	-0.41	0.43	0.1	5.58	4.07	13.39	15.13
	35.5	1.92	-1.19	-1.18	-1.52	3.71	2.97	10.81	11.48
	36	0.18	-2.04	-2.86	-3.01	1.47	1.87	8.18	8.25
	36.5	-0.97	-2.76	-4.43	-4.56	-0.15	0.82	6.08	5.71
	37	-2.63	-3.76	-5.99	-6.38	-2.37	0.11	4.25	3.89
	37.5	-4.6	-5.21	-7.48	-7.93	-5.23	-3.52	1.61	2.54
	38	-6.29	-7.05	-9.37	-9.25	-7.93	-9.43	-1.01	1.25
	38.5	-8.9	-8.76	-11.47	-11.1	-10.95	-14.82	-3	-0.03
	39	-12.56	-11.11	-14.14	-13.45	-14.54	-20.78	-5.6	-0.65
	39.5	-16.6	-14.57	-18.49	-16.91	-18.5	-28.44	-8.93	-1.12
	40	-21.85	-19.2	-24.07	-22.17	-24.42	-31.8	-12.02	-2.05
	40.5	-29.46	-25.58	-31.51	-29.31	-33.83	-31.66	-16.39	-3.69
	41	-39.52	-35.12	-42.06	-38.69	-46.69	-34.61	-23.37	-6.75
	41.5	-51.83	-48	-55.28	-50.51	-63.73	-40.66	-32.04	-11.58
	42	-65.59	-62.97	-69.28	-63.95	-84.66	-48.88	-42.7	-18.19
	42.5	-79.22	-78.94	-83.57	-77.76	-106.77	-61.27	-56	-26.5
	43	-90.22	-93.78	-95.92	-90.22	-125.79	-76.72	-69.29	-35.85
	43.5	-95.48	-103.61	-103.08	-98.19	-138.64	-89.38	-79.65	-44.85
	44	-93.83	-106.29	-103.66	-99.86	-142.39	-96.34	-86.02	-52.61
	44.5	-86.14	-101.97	-98.13	-95.37	-135.46	-96.58	-86.97	-58.07
	45	-73.37	-90.86	-86.82	-85.05	-119.41	-90.26	-80.67	-59.23
	45.5	-57.81	-75.07	-71.26	-70.16	-97.52	-78.36	-69.01	-55.71
	46	-42.59	-58.73	-54.92	-54.28	-73.49	-63.12	-54.95	-48.63
	46.5	-29.37	-43.28	-39.51	-39.74	-50.76	-47.28	-39.64	-38.83
	47	-18.21	-29.34	-25.69	-26.85	-31.61	-32.79	-24.82	-27.78
	47.5	-9.72	-19.02	-14.83	-16.69	-16.29	-20.52	-12.94	-17.73
	48	-3.86	-11.62	-7.2	-9.62	-5.22	-10.67	-3.7	-9.49
	48.5	0.33	-5.33	-1.21	-4.56	2.57	-3.63	3.9	-3
	49	3.13	-0.8	2.95	-0.34	8.27	1.11	8.87	1.64
	49.5	4.76	1.74	5.23	2.88	11.88	4.71	12.19	5.2
	50	5.97	4.25	7.3	5.12	14.14	7.25	15.11	7.75
	50.5	7.15	6.45	9.06	6.93	16.06	8.66	16.94	9.43
	51	7.71	7.17	9.9	8.27	17.24	10.06	17.72	10.58
	51.5	8.09	7.78	10.79	9.02	18.03	11.51	18.54	11.35
	52	8.32	8.3	11.52	9.29	19.01	12.22	18.83	11.67
	52.5	8.12	8.11	11.55	9.76	19.83	12.62	18.69	12.37
	53	7.88	7.94	11.68	9.97	20.43	13.27	19.04	13.1
	53.5	7.9	8.52	11.88	10.17	21.38	13.67	19.35	13.57
	54	8.01	9	11.83	10.16	22.09	13.74	19.66	13.98
	54.5	8.35	9.48	12.36	9.72	22.78	14.14	20.49	13.97
	55	8.74	10.39	12.92	9.16	23.44	14.71	20.97	13.59
	55.5	8.71	10.87	13.53	9.09	23.73	15.28	20.77	13.22
	56	8.87	10.8	13.4	9.1	23.8	15.4	20.54	13.09
	56.5	9.26	10.78	12.28	9.21	23.71	15.51	20.05	13.17
	57	9.45	11.12	10.88	9.98	23.64	15.51	19.22	13.42
	57.5	9.71	11.13	9.34	10.81	23.61	14.98	18.58	13.24
	58	10.26	11.3	7.44	11.5	23.79	14.24	18.04	13.37
	58.5	10.3	12.19	7.27	12	23.51	14.49	17.58	13.24
	59	10.15	12.91	8.98	12.38	23.34	14.7	17.47	12.34
	59.5	10.14	13.12	10.5	12.25	23.27	14.48	17.15	12.12
	60	10.33	13.61	12.37	11.81	22.7	15.04	16.68	12.45
	60.5	10.82	14.3	14.23	11.17	22.06	15.98	16.64	11.98
	61	11.91	14.32	15.17	10.89	22.26	15.91	16.41	11.58
	61.5	12.92	14.44	15.15	10.88	22.41	15.61	15.91	12.01
	62	13.58	15.03	15.09	11.41	22.03	15.82	15.67	11.87
	62.5	13.93	15.32	14.78	12.6	22.07	15.71	15.38	11.84
	63	13.8	15.18	14.63	13.72	22.02	15.11	14.66	12.32
	63.5	13.42	15.44	14.82	14.26	21.47	14.74	14.26	12.53
	64	12.96	15.98	15.33	14.48	21.1	15.22	14.03	12.31
	64.5	12.75	15.82	15.9	14.54	21.16	15.57	13.87	11.99
	65	12.89	15.82	16.48	14.04	21.35	15.49	13.89	11.19
	65.5	13.25	16.58	16.81	13.38	21.96	15.67	14.22	10.24
	66	13.55	16.6	16.46	13.58	22.67	15.83	14.56	9.89
	66.5	13.94	16.92	15.68	13.8	23.57	15.15	15.04	9.65
	67	14.21	17.66	15.19	13.62	24.21	14.78	15.42	9.46
	67.5	15.4	20.82	15.54	14.7	27.32	15.36	17.55	10.3
	68	7.03	10.4	6.82	6.75	13.06	6.74	8.54	4.79
Raw data on ThermFluor study of PG substrate binding with E207A mutant
	Temperature	0 mM	0.046875 mM	0.09375 mM	0.1875 mM	0.375 mM	0.75 mM	1.50 mM	3.0 mM
	25	0.17	1.45	2.32	1.77	2.92	4.54	6.76	2.21
	25.5	0.38	3.13	5.02	3.84	6.33	9.83	14.64	4.78
	26	0.35	2.89	4.63	3.55	5.85	9.08	13.51	4.41
	26.5	0.35	2.89	4.63	3.55	5.85	9.08	13.51	4.41
	27	0.35	2.89	4.63	3.55	5.85	9.08	13.51	4.41
	27.5	0.46	2.9	4.61	3.5	5.78	9.15	13.47	4.3
	28	-0.17	2.79	4.68	3.77	6.18	8.67	13.78	4.99
	28.5	-1.96	2.9	5.32	4.37	6.81	8.04	13.84	6.48
	29	-2.9	3.61	6.3	4.91	7.76	8.22	13.82	7.64
	29.5	-2.89	4.81	7.8	5.96	8.98	8.83	14.51	9.63
	30	-0.9	5.66	9.39	6.99	10.23	9.06	15.24	13.17
	30.5	2.69	6.79	10.14	7.28	11.17	9.49	14.93	15.33
	31	5.9	7.88	10.24	7.82	11.76	10.21	14.07	15.31
	31.5	8.52	8.43	10.31	8.39	11.42	10.11	12.7	14.84
	32	10.32	8.67	9.71	8.34	10.05	9.62	9.74	12.49
	32.5	10.62	8.38	8.65	7.86	8.72	9.7	6.45	8.15
	33	9.08	7.48	8.18	7.95	7.44	9.58	4.09	4.58
	33.5	7.32	6.18	7.34	7.54	6.21	8.68	2.18	1.98
	34	5.56	4.66	5.66	6	5.04	7.85	0.44	-0.15
	34.5	3.47	3.15	4.02	4.51	4.29	6.85	-0.64	-0.94
	35	1.64	1.89	2.57	3.23	3.4	5.43	-1.55	-1.33
	35.5	0.72	0.62	1	1.4	2.2	3.95	-2.26	-1.86
	36	-0.27	-0.38	-0.33	-0.22	1.22	2.76	-2.91	-1.7
	36.5	-1.19	-1.33	-1.03	-0.58	0.71	1.8	-3.44	-1.75
	37	-1.35	-2.28	-1.46	-0.68	0.16	0.86	-3.39	-2.31
	37.5	-1.38	-2.88	-2.07	-1.1	-0.44	-0.38	-3.1	-1.95
	38	-1.89	-3.58	-2.79	-1.6	-1.1	-1.39	-3.31	-1.59
	38.5	-2.44	-4.53	-3.5	-2.4	-2.05	-2.16	-3.39	-2.23
	39	-3.31	-5.37	-4.33	-3.84	-3.32	-3.18	-3.25	-2.31
	39.5	-4.7	-6.49	-5.64	-5.82	-4.72	-4.18	-3.91	-1.98
	40	-6.47	-8.05	-7.41	-7.96	-6.24	-5.24	-4.76	-2.62
	40.5	-8.73	-9.49	-9.3	-10.33	-8.16	-6.59	-5.25	-3.3
	41	-11.16	-11.41	-11.17	-13.26	-10.33	-8.52	-6.2	-3.33
	41.5	-13.52	-13.94	-13.94	-16.47	-12.77	-10.91	-7.62	-4.05
	42	-16.49	-16.35	-17.12	-19.61	-15.52	-13.29	-8.76	-5.33
	42.5	-19.41	-18.9	-19.71	-22.42	-18.15	-15.47	-9.75	-5.97
	43	-21.24	-21.23	-21.92	-25.39	-20.08	-17.92	-10.74	-6.32
	43.5	-22.74	-22.45	-24.15	-27.55	-21.6	-20.07	-11.7	-6.94
	44	-23.65	-22.63	-25.16	-28.6	-22.45	-21.08	-11.98	-7.44
	44.5	-22.98	-22.17	-24.4	-29.26	-22.44	-21.49	-11.57	-7.33
	45	-21.75	-20.91	-23	-29.12	-21.95	-21.47	-11.39	-7.35
	45.5	-20.74	-19.54	-21.39	-26.77	-20.49	-20.31	-11.11	-7.62
	46	-18.84	-17.56	-18.8	-23.7	-18.28	-18.2	-9.95	-7.44
	46.5	-16.49	-15.16	-15.9	-20.6	-15.85	-15.98	-8.96	-6.71
	47	-14.58	-13.2	-13.32	-16.35	-13.08	-13.73	-8.23	-5.98
	47.5	-12.28	-11.04	-10.59	-12.73	-9.94	-11.28	-7.08	-5.13
	48	-9.34	-8.19	-7.9	-10.48	-7.5	-8.96	-5.96	-4
	48.5	-7.12	-6.5	-5.83	-7.89	-5.47	-6.94	-4.9	-3.4
	49	-5.31	-5.6	-3.98	-5.65	-3.45	-5.72	-4.02	-3.27
	49.5	-3.43	-3.93	-2.54	-4.69	-2.11	-4.68	-3.58	-3.12
	50	-2.22	-2.68	-1.76	-2.78	-0.91	-3.61	-3.14	-3.2
	50.5	-1.86	-2.06	-0.67	-0.51	0.29	-3.06	-2.55	-3.44
	51	-1.36	-0.78	0.69	0.31	1.12	-2.78	-2.48	-2.94
	51.5	-0.8	0.63	1.83	1.15	1.66	-1.52	-2.21	-2.02
	52	-0.43	1.41	2.89	2.48	2.79	-0.09	-1.38	-1.63
	52.5	-0.14	2.15	3.95	2.65	3.59	0.42	-0.36	-0.96
	53	0.36	2.83	4.41	2.48	3.97	0.98	0.33	-0.24
	53.5	1.16	3.15	4.68	2.87	4.59	1.38	0.84	-0.38
	54	1.66	3.54	4.62	3.11	5.33	0.84	1.41	-0.66
	54.5	1.9	3.9	4.53	3.24	5.42	-0.14	1.56	-0.37
	55	2.52	4.13	5.01	3.72	5.24	-0.15	1.1	0.13
	55.5	3.4	4.44	5.54	4.17	5.87	0.1	0.98	0.4
	56	3.69	4.73	5.86	4.62	6.23	0.5	1.52	0.62
	56.5	3.73	4.95	6.67	5.17	6.15	1.52	1.64	0.73
	57	4.16	5.53	7.38	5.58	6.61	2.72	1.81	0.74
	57.5	4.39	6.18	7.25	6.04	6.99	3.63	2.51	0.02
	58	4.13	6.55	7.06	6.58	6.53	4.43	2.87	-0.47
	58.5	4.49	7.16	6.92	7.2	6.75	4.94	2.56	0.17
	59	5.12	7.76	6.6	7.98	7.38	5.15	2.44	0.78
	59.5	5.26	7.75	6.32	8.98	7.06	5.01	2.25	0.65
	60	5.58	7.95	6.45	9.88	7.16	4.18	1.86	0.86
	60.5	5.91	8.79	6.78	10.6	7.42	3.69	1.85	1.48
	61	5.32	8.9	7.05	11.29	6.7	3.78	2.17	1.27
	61.5	4.64	8.73	6.98	11.87	6.12	3.53	2.65	1.06
	62	4.46	9.44	7.01	12.1	6.55	3.7	3.54	1.45
	62.5	4.54	10.03	6.82	12.36	6.71	4.64	4.04	1.73
	63	4.95	10.26	6.12	12.83	7.21	4.98	3.99	1.27
	63.5	6.34	11.63	5.93	13.04	7.87	4.81	3.47	0.99
	64	7.44	12.52	5.7	13.16	8.07	5.13	3.03	0.88
	64.5	10.08	15.3	6.68	14.35	8.12	5.38	1.67	0.74
	65	5.49	7.87	3.43	6.61	3.32	2.27	0.05	0.37
Raw data on ThermFluor study of PG substrate binding with Y330F mutant
	Temperature	0 mM	0.046875 mM	0.09375 mM	0.1875 mM	0.375 mM	0.75 mM	1.50 mM	3.0 mM
	25	2.58	2.64	3.01	3.32	3.28	2.35	2.21	1.1
	25.5	5.59	5.71	6.52	7.19	7.11	5.1	4.78	2.39
	26	5.16	5.27	6.02	6.64	6.56	4.71	4.41	2.2
	26.5	5.16	5.27	6.02	6.64	6.56	4.71	4.41	2.2
	27	5.16	5.27	6.02	6.64	6.56	4.71	4.41	2.2
	27.5	5.18	5.33	6.04	6.62	6.5	4.66	4.31	2.04
	28	4.91	4.89	5.86	6.74	6.88	4.96	4.9	2.96
	28.5	5.59	4.82	5.73	6.81	7.6	5.41	6.44	5.68
	29	7.16	5.24	6.41	7.02	8.24	6.01	8.3	8.69
	29.5	8.36	5.5	7.41	6.87	9.23	7.31	10.51	12.08
	30	9.18	6.48	8.17	7.18	10.3	7.82	12.52	15.85
	30.5	10.72	7.44	8.68	7.56	10.64	7.5	13.67	18.86
	31	12.27	7.07	8.69	7.18	9.92	7.44	13.49	20.42
	31.5	12.23	6.19	8.32	6.64	9.04	7.25	12.27	20.85
	32	11.61	5.54	7.54	6.21	8.3	6.54	10.91	19.88
	32.5	10.94	4.64	6.14	5.45	7.04	5.67	9.38	17.12
	33	9.31	3.65	4.53	4.31	5.67	5	7.46	13.68
	33.5	6.75	2.83	3.05	3.44	5.38	4.34	6.04	10.19
	34	5.14	2.31	1.03	2.42	4.87	2.87	5.32	6.66
	34.5	3.68	1.76	-1.05	1.15	3.21	0.91	3.83	3.5
	35	1.18	1.02	-2.3	-0.61	2.14	-0.46	1.78	1.82
	35.5	-1.07	0.31	-3.83	-1.8	1.11	-2.09	0.06	1.15
	36	-2.6	0.08	-6.11	-2.84	-1.07	-4.8	-1.41	0.72
	36.5	-5.31	-0.3	-8.46	-4.44	-3.3	-7.26	-3.4	0.83
	37	-8.57	-1.18	-11.59	-5.85	-4.64	-9.18	-5.31	0.73
	37.5	-11.65	-2.07	-16.55	-7.7	-6.92	-12.39	-6.55	0.26
	38	-16.32	-3.35	-22.34	-11.64	-10.74	-16.92	-8.36	-0.36
	38.5	-23.49	-5.72	-29.63	-17.37	-15.35	-22.32	-12.02	-1.6
	39	-32.28	-9.01	-39.26	-24.7	-21.85	-29.94	-16.93	-3.78
	39.5	-43.52	-13.05	-51	-35.62	-31.93	-41.11	-23.51	-6.18
	40	-57.48	-18.63	-64.51	-49.28	-44.61	-54.68	-33.26	-9.53
	40.5	-72.17	-25.14	-78.97	-63.4	-57.9	-69.42	-44.9	-14.25
	41	-85.74	-31.69	-92.06	-77.33	-71.57	-84.34	-56.98	-19.8
	41.5	-96.31	-37.35	-101.37	-89.09	-83.29	-97.12	-68.66	-26.12
	42	-101.72	-41.24	-104.74	-94.77	-89.25	-104.51	-77.49	-32.27
	42.5	-100	-42.04	-100.64	-92.75	-88.46	-104.63	-81.47	-37.25
	43	-91.46	-39.62	-89.98	-85.09	-81.85	-97.93	-80.27	-40.52
	43.5	-77.45	-34.84	-74.42	-72.16	-69.71	-85.01	-73.36	-40.49
	44	-60.26	-28.48	-56.58	-55.27	-53.54	-67.34	-62.02	-36.72
	44.5	-42.35	-21.23	-38.94	-38.64	-36.89	-48.53	-48.78	-30.97
	45	-26.4	-14.57	-23.71	-24.63	-22.19	-31.81	-34.74	-23.92
	45.5	-13.53	-9.13	-11.62	-12.36	-9.88	-17.6	-21.6	-15.95
	46	-3.68	-4.26	-2.61	-2.66	-0.1	-6.3	-11.36	-9.04
	46.5	2.95	-0.57	4.05	3.3	6.36	1.17	-3.5	-4.09
	47	7.33	2.06	8.55	7.45	9.92	6.23	2.18	-0.05
	47.5	10.35	3.96	11.43	10.47	12.37	10.15	5.01	2.9
	48	12.19	5.13	13.3	11.82	14.46	12.49	6.54	4.65
	48.5	13.04	5.59	14.6	12.4	15.59	13.62	8.29	5.74
	49	13.71	5.77	15.24	13.46	15.89	14.47	9.09	6.73
	49.5	14.06	5.53	15.37	14.23	16.62	15.14	9.55	7.28
	50	14.15	5.75	15.74	14.65	17.38	15.45	11.05	7.49
	50.5	14.65	2.65	16.03	15.56	17.33	16.17	12.16	7.57
	51	15.26	-3.99	15.87	16.33	16.9	17.13	12.25	7.85
	51.5	16.07	-10.02	16	16.31	17.17	17.9	12.77	7.96
	52	16.76	-16.2	16.45	16.25	17.51	18.37	13.3	7.69
	52.5	17.22	-23.19	16.52	16.22	17.21	18.62	13.1	7.72
	53	17.54	-22.77	16.84	15.79	16.97	18.28	13.12	7.94
	53.5	17.59	-15.61	17.49	15.52	17.19	17.71	13.35	7.76
	54	17.08	-9.34	17.43	15.61	17.31	17.66	13.3	7.77
	54.5	17.01	-2.24	17.11	15.86	16.88	17.53	13.31	8.11
	55	17.41	4.95	16.98	15.98	16.63	17.61	13.35	7.81
	55.5	17.26	8.04	16.51	16	16.63	18.32	13.22	7.41
	56	17.44	8.2	15.65	15.73	16.33	18.43	13.05	7.42
	56.5	17.91	8.95	15.25	15.39	15.44	17.99	13.11	7.2
	57	17.75	8.81	15.37	15.04	14.9	18.15	13.41	6.95
	57.5	17.24	8.65	15.36	14.88	15.13	18.28	13.53	7.22
	58	17.35	9.05	15.29	14.99	15.12	17.89	13.75	7.22
	58.5	17.59	9.16	15.72	14.77	14.87	18.1	14.15	6.87
	59	17.8	8.51	16.28	14.34	15.09	18.26	14.09	6.76
	59.5	17.95	8.07	16	14	15.18	17.61	13.61	6.89
	60	18.18	8.33	15.65	13.77	14.43	17.06	13.78	6.89
	60.5	18.4	8.37	15.76	13.16	13.71	16.98	13.81	7.28
	61	18.03	8.27	15.74	13.2	13.31	17.1	13.39	7.73
	61.5	17.31	8.95	15.29	13.79	13.11	16.94	13.17	7.93
	62	17.24	9.9	15.33	13.87	13.01	17.19	12.85	7.78
	62.5	17.39	10.04	16.2	13.53	12.69	17.09	12.44	7.5
	63	16.75	9.72	16.72	13.51	12.53	16.19	12.13	7.38
	63.5	16.7	9.21	17.62	12.99	12.02	15.08	13.15	7.72
	64	17	8.77	18.65	12.23	11.41	14.38	13.69	7.83
	64.5	18.72	8.23	22.15	12.34	11.07	14.56	17.61	9.51
	65	8.78	3.34	10.99	5.31	4.61	6.3	9.53	4.98
Raw data on ThermFluor study of PG substrate binding with R209E mutant
	Temperature	0 mM	0.046875 mM	0.09375 mM	0.1875 mM	0.375 mM	0.75 mM	1.50 mM	3.0 mM
	25	-0.69	3.5	2.83	4.47	2.48	4.42	3.72	5.1
	25.5	-1.49	7.59	6.13	9.69	5.37	9.58	8.07	11.05
	26	-1.38	7.01	5.66	8.95	4.95	8.84	7.45	10.2
	26.5	-1.38	7.01	5.66	8.95	4.95	8.84	7.45	10.2
	27	-1.38	7.01	5.66	8.95	4.95	8.84	7.45	10.2
	27.5	-1.37	7.01	5.61	8.9	4.94	8.83	7.4	10.09
	28	-1.49	6.95	5.87	9.18	4.98	8.83	7.61	10.65
	28.5	-1	6.83	6.61	9.88	5.17	9.32	8.59	12.76
	29	0.54	7.38	7.03	10.77	5.59	10.21	9.39	15.49
	29.5	2.31	8.32	7.53	11.17	6.18	10.61	10.42	19.01
	30	4.59	8.51	8.58	11.39	6.09	10.7	11.96	23.97
	30.5	7.85	8.82	9.03	11.28	5.66	10.98	13.27	27.58
	31	10.57	9.54	8.57	10.55	5.65	10.9	13.75	28.31
	31.5	12.19	8.99	8.01	9.59	5.15	10.1	13.56	26.94
	32	13.27	7.78	6.98	8.67	4.36	9.48	13.15	22.78
	32.5	12.99	6.88	5.58	7.55	3.87	8.8	12.05	16.61
	33	11.56	5.72	4.63	6.42	2.97	7.44	10.27	11.36
	33.5	9.7	3.62	3.22	5.39	1.48	5.89	8.49	7.26
	34	7.46	1.75	1.64	4.08	0.03	4.64	6.9	3.79
	34.5	4.83	0.22	0.33	2.89	-1.75	2.74	4.95	2.02
	35	1.78	-1.75	-1.42	1.59	-4.41	0.41	2.58	1.06
	35.5	-1.55	-4.2	-3.52	-0.39	-6.8	-1.17	0.59	-0.31
	36	-4.96	-6.31	-5.05	-2.63	-8.78	-2.88	-1.11	-1.67
	36.5	-8.49	-8.16	-6.45	-4.75	-11.2	-4.92	-3.4	-2.54
	37	-11.65	-10.31	-8.3	-7.22	-13.81	-6.57	-5.48	-3.52
	37.5	-13.92	-12.74	-10.31	-9.99	-16.17	-8.16	-6.98	-4.43
	38	-16.38	-15.27	-12.8	-12.35	-18.97	-10.49	-8.71	-5.26
	38.5	-19.01	-17.91	-15.66	-14.58	-22.45	-13.07	-10.83	-6.26
	39	-21.06	-20.98	-19.18	-17.08	-26.16	-15.42	-12.46	-7.36
	39.5	-23.45	-23.75	-22.56	-19.78	-29.54	-17.8	-14.37	-8.78
	40	-26.15	-26.03	-24.9	-21.79	-32.39	-20.1	-16.69	-10.18
	40.5	-27.58	-27.4	-26.27	-22.84	-34.56	-21.73	-18.58	-11.06
	41	-27.75	-27.84	-26.92	-23.4	-35.48	-22.5	-19.76	-11.32
	41.5	-27.53	-27.01	-26.27	-23.13	-34.71	-22.38	-20.46	-11.52
	42	-26.13	-25.1	-24.52	-21.18	-32.84	-21.37	-19.92	-11.03
	42.5	-23.21	-22.09	-22.44	-18.2	-30.03	-19.37	-17.99	-10.31
	43	-20.13	-18.79	-19.76	-15.53	-26.7	-16.39	-15.69	-9.92
	43.5	-17.03	-15.5	-16.53	-12.31	-22.92	-13.02	-13.39	-9.22
	44	-13.2	-12.02	-12.9	-8.4	-18.49	-10.08	-10.7	-8.25
	44.5	-9.23	-9.28	-9.61	-5.19	-14.5	-7.17	-7.91	-7.62
	45	-6	-7.26	-6.52	-2.95	-11.02	-4.28	-5.89	-6.54
	45.5	-3.07	-4.78	-4.15	0.03	-7.02	-2.07	-4.14	-4.64
	46	-0.43	-2.35	-2.12	2.83	-3.74	-0.18	-1.72	-3.3
	46.5	1.46	-0.94	-0.36	4.83	-2.26	1.78	0.45	-2.06
	47	2.51	0.79	1.19	6.74	-0.31	3.52	1.69	-0.7
	47.5	3.23	2.85	2.53	8.67	1.72	4.81	3.23	0.05
	48	4.04	3.65	4.05	9.69	2.75	5.73	4.83	0.03
	48.5	4.67	4.21	5.35	9.94	4.12	7.02	5.65	0.04
	49	5.26	5.35	6.12	10.05	6.1	8.28	6.34	0.13
	49.5	6.15	5.94	6.79	10.37	7.12	8.85	7.16	0.28
	50	7.09	6.18	6.91	10.77	8.04	9.45	7.62	0.45
	50.5	7.72	7.07	6.96	10.82	9.19	10.27	8.03	0.9
	51	8.43	7.71	7.27	11.48	9.64	10.25	8.4	1.86
	51.5	8.76	8.14	7.52	12.06	9.94	9.96	8.57	2.59
	52	8.72	9.19	7.78	11.91	10.63	10.3	8.45	2.85
	52.5	8.86	9.61	8.8	11.65	10.83	10.61	8.52	3.32
	53	8.98	9.61	9.47	11.95	10.72	10.78	8.79	3.41
	53.5	8.74	10.18	9	11.94	11.3	11.3	8.96	2.67
	54	8.62	10.18	8.51	11.81	11.82	11.85	8.97	2.47
	54.5	9.01	9.37	8.44	12.17	11.59	11.93	9.43	2.88
	55	9.22	9.53	7.79	12.43	11.78	11.64	9.77	2.79
	55.5	9.11	9.74	7.26	12.38	12.45	11.18	9.51	3
	56	9.45	9.11	7.8	12.49	12.25	10.67	9.12	3.76
	56.5	10.16	9.07	8.7	12.56	12.06	10.23	8.91	3.61
	57	10.25	9.39	9.03	11.98	12.93	10.23	8.68	3.25
	57.5	10.14	9.23	9.59	11.65	13.26	10.66	8.6	3.42
	58	10.4	9.07	10.11	11.42	12.98	11.23	8.73	3.36
	58.5	10.28	9.2	10.41	10.54	13.31	11.41	9.04	2.92
	59	9.75	9.35	10.41	10.24	13.71	11.33	9.32	3.16
	59.5	9.41	9.44	10.21	10.73	13.77	10.94	9.15	3.59
	60	9.18	9.39	9.87	10.25	14.23	10.33	8.5	3.69
	60.5	8.81	9.12	9.64	9.6	15.03	10.07	7.91	3.57
	61	8.35	9.12	9.2	9.68	15.55	9.85	7.42	3.77
	61.5	8.04	9.3	8.36	9.05	15.96	9.39	7.16	3.76
	62	7.86	9.19	8.03	8.07	16.24	9.47	7.42	3.11
	62.5	7.93	9.09	7.98	8.32	16.32	9.35	7.37	2.86
	63	8.38	9.68	7.89	8.76	16.52	8.82	7.39	3.06
	63.5	9.16	9.97	7.66	9.17	16.7	8.07	6.36	3.66
	64	9.72	9.72	7.99	9.89	16.72	7.85	5.6	3.85
	64.5	11.45	10.56	8.35	11.9	18.07	6.88	3.19	5.85
	65	5.63	4.85	3.56	5.9	8.27	2.35	0.13	3.46
