# Supplementary material for: Allosteric cooperation in β-lactam binding to a non-classical transpeptidase
Source: eLife. 2022 Apr 27;11:e73055. doi: 10.7554/eLife.73055 (PMC9094749; doi:10.7554/eLife.73055)
Supplement: Figure 2—source data 1. [file elife-73055-fig2-data1.xlsx]

## Sheet: Sheet1
	Raw data on nitrocefin hydrolysis assay, Figure 2B
		Nitrocefin (uM)	IgD1		IgD2		IgD1-IgD2		YkuD		IgD2-YkuD		Wild-type		R209E		Y330F
		0	0.00864	0.007	0.00756	0.0081	0.01836	0.0092	0.01728	0.019	0.01512	0.02052	0.00864	0.00756	0	0	0	0
		4	0.01296	0.0131	0.01072	0.011	0.02484	0.0233	0.027	0.0281	0.05616	0.0378	0.0324	0.027	0.011924	0.020596	0.040108	0.023848
		8	0.0162	0.0154	0.02592	0.0232	0.02268	0.0225	0.02808	0.0291	0.05616	0.05832	0.04752	0.04536	0.020596	0.0271	0.057452	0.049864
		16	0.01512	0.0154	0.02484	0.0234	0.02592	0.0267	0.02484	0.02811	0.08748	0.0918	0.06912	0.06588	0.03252	0.033604	0.101896	0.082384
		40	0.0162	0.017	0.02592	0.026	0.02592	0.028	0.04104	0.042	0.16632	0.14796	0.12744	0.12636	0.0271	0.030352	0.137668	0.120324
		80	0.02484	0.0243	0.0324	0.033	0.027	0.02849	0.05076	0.0511	0.18468	0.1782	0.17604	0.16632	0.030352	0.031436	0.134416	0.136584
		100	0.03996	0.042	0.04644	0.047	0.03348	0.036	0.06264	0.0632	0.19764	0.18684	0.19872	0.18036	0.06504	0.071544	0.15718	0.153928
		200	0.035	0.039	0.0458	0.049	0.04536	0.0482	0.07776	0.0791	0.1836	0.19872	0.19548	0.19008	0.069376	0.074796	0.145256	0.13008
		300	0.04452	0.049	0.06072	0.061	0.06048	0.0612	0.10152	0.112	0.18792	0.18252	0.19656	0.16956	0.10298	0.110568	0.148508	0.121544
		400	0.07584	0.0712	0.07368	0.0722	0.06912	0.07123	0.12312	0.1272	0.18576	0.18468	0.17496	0.17388	0.123576	0.125744	0.139836	0.170188
		Nonlinear data fit
				IgD1	IgD2	IgD1-IgD2	YkuD	IgD2-YkuD	Wild-type	R209E	Y330F
			Michaelis-Menten
			Best-fit values
			Vmax	0.08346	0.07091	0.06734	0.152	0.2057	0.2068	0.1916	0.1558
			Km	149.6	53.68	54.53	129.5	16.18	24.16	244.7	12.13
			Std. Error
			Vmax	0.01528	0.006637	0.009221	0.01975	0.005968	0.007393	0.03658	0.005322
			Km	64.52	17.09	25.27	41.8	2.235	3.738	91.94	2.1
			95% CI (asymptotic)
			Vmax	0.05135 to 0.1156	0.05696 to 0.08485	0.04796 to 0.08671	0.1105 to 0.1935	0.1932 to 0.2182	0.1912 to 0.2223	0.1147 to 0.2684	0.1446 to 0.1670
			Km	14.08 to 285.2	17.77 to 89.59	1.445 to 107.6	41.70 to 217.3	11.48 to 20.87	16.30 to 32.01	51.60 to 437.9	7.720 to 16.54
			Goodness of Fit
			Degrees of Freedom	18	18	18	18	18	18	18	18
			R squared	0.7826	0.8279	0.5589	0.8529	0.9629	0.9618	0.8892	0.946
			Sum of Squares	0.001636	0.00139	0.002635	0.003543	0.003252	0.003737	0.003348	0.003061
			Sy.x	0.009532	0.008788	0.0121	0.01403	0.01344	0.01441	0.01364	0.01304
			Constraints
			Km	Km > 0	Km > 0	Km > 0	Km > 0	Km > 0	Km > 0	Km > 0	Km > 0
			Number of points
			# of X values	20	20	20	20	20	20	20	20
			# Y values analyzed	20	20	20	20	20	20	20	20
