# Supplementary material for: Allosteric cooperation in β-lactam binding to a non-classical transpeptidase
Source: eLife. 2022 Apr 27;11:e73055. doi: 10.7554/eLife.73055 (PMC9094749; doi:10.7554/eLife.73055)
Supplement: Figure 3—source data 1. [file elife-73055-fig3-data1.xlsx]

## Sheet: Sheet1
0	Average	5.50985	2.17254	2.24257	7.15851	5.99321	2.93994	3.01501	4.28661	3.95954	3.94987	5.02716
1	336_340m	336_340w	336_337w	336_337m(A)	303_340w	303_340m	336_354w	336_354m	303_336w	303_336m	336_351w	336_351m
0.1	6.76653	5.34134	2.18282	2.15098	6.60906	6.76653	2.872	2.76272	4.13807	4.47713	3.72204	4.5972
0.2	5.89989	5.06905	2.18395	2.31798	6.34988	5.89989	2.91296	2.88864	4.01634	3.81786	3.78357	4.86095
0.3	6.29693	5.23829	2.29136	2.17327	5.98112	6.29693	3.14662	2.88509	3.91255	4.26699	3.82703	4.65491
0.4	5.79863	5.24979	2.18039	2.13573	5.42429	5.79863	3.05518	3.06636	3.72439	4.40189	4.04113	4.91438
0.5	5.83723	5.33748	2.17768	2.10074	6.23339	5.83723	2.87546	2.92985	4.05802	3.97437	3.74122	4.95351
0.6	6.38087	5.32343	2.15502	2.1688	6.24259	6.38087	2.9766	3.05715	4.50123	4.12074	3.9275	4.80527
0.7	5.90669	5.14582	2.2145	2.19142	5.59462	5.90669	3.12622	2.92963	3.75173	4.21144	4.04992	4.88176
0.8	5.65367	5.265	2.17071	2.19173	5.89963	5.65367	2.99207	2.8274	4.18186	3.85494	4.11348	4.82222
0.9	5.82836	5.36738	2.1564	2.24362	6.05354	5.82836	3.1693	2.87303	4.00301	3.80185	4.26717	4.81081
2	6.01612	5.26177	2.16346	2.15943	6.59074	6.01612	3.01967	2.9577	4.4283	4.37197	3.94685	5.02032
3	6.01612	5.26177	2.16346	2.15943	6.59074	6.01612	3.01967	2.9577	4.4283	4.37197	3.94685	5.02032
1.1	6.55107	5.37187	2.23942	2.20336	6.71445	6.55107	2.95815	2.74199	4.47327	4.4245	4.04054	4.45364
1.2	6.47649	5.31303	2.28198	2.20516	6.54156	6.47649	3.11344	3.00478	4.35478	4.35049	3.89348	5.11749
1.3	6.67473	5.26514	2.18974	2.12119	6.68708	6.67473	3.10202	2.83643	4.59539	4.53248	3.95167	5.06677
1.4	6.10233	5.0186	2.17659	2.21628	6.04854	6.10233	2.98174	2.97172	4.1563	4.1233	3.99684	5.14506
1.5	6.16603	5.22185	2.18172	2.19166	6.97463	6.16603	3.08433	2.95055	5.0574	3.76882	4.09014	4.53707
1.6	6.3102	5.63897	2.19712	2.13921	6.80706	6.3102	2.94475	2.99893	4.4048	4.23519	3.7977	4.905
1.7	5.70712	5.44526	2.08814	2.19243	6.64612	5.70712	2.97077	2.87761	4.40428	3.93374	3.9083	4.87624
1.8	5.97473	5.04741	2.13333	2.21234	6.37272	5.97473	2.99922	3.05845	4.25544	4.22673	3.91269	5.13379
1.9	6.31436	5.12409	2.14406	2.18224	6.55234	6.31436	3.10117	2.83704	4.70831	4.3739	4.08044	4.7692
4	6.50021	5.19273	2.26386	2.07638	6.30083	6.50021	2.90537	2.93892	4.40433	4.55168	3.81306	4.71116
2.1	6.06446	5.19048	2.18805	2.20354	5.8014	6.06446	3.03263	3.16036	4.08653	4.47708	3.98804	5.09525
2.2	6.96018	5.60778	2.16851	2.16263	6.30717	6.96018	2.96635	2.83289	4.09711	4.54583	3.80432	4.74352
2.3	6.52536	5.16801	2.2171	2.24202	6.30562	6.52536	2.92481	3.04915	4.20499	4.59309	4.0627	5.01751
2.4	6.3377	5.16767	2.1747	2.18964	6.30325	6.3377	3.04413	2.96779	4.24198	4.24123	3.98703	5.00344
2.5	5.98142	5.26748	2.15037	2.13995	6.01074	5.98142	3.16318	3.10748	4.09417	3.96578	4.09282	5.1901
2.6	6.55842	5.04021	2.26233	2.21021	6.74075	6.55842	2.9735	2.74657	4.34879	4.0801	3.99963	4.52851
2.7	5.97668	5.17853	2.09034	2.27293	6.87331	5.97668	2.86224	3.04651	4.79988	4.09574	4.09292	5.05936
2.8	6.01084	5.1596	2.18946	2.18488	6.70097	6.01084	3.04175	2.91973	4.49515	3.83802	3.99446	4.86747
2.9	6.02447	5.23644	2.28701	2.14771	6.767	6.02447	3.20243	2.94624	4.46503	3.84794	3.93888	5.00963
5	5.72177	5.12957	2.23514	2.18157	6.27886	5.72177	3.07014	3.15554	4.15762	4.00975	4.10802	4.97545
3.1	6.33054	5.11784	2.13752	2.13068	6.37498	6.33054	2.94013	3.00084	4.47099	4.39236	3.86552	5.10201
3.2	6.53526	5.17136	2.17993	2.18924	6.16596	6.53526	2.98813	2.91799	3.97819	4.03078	4.08538	4.81351
3.3	5.93253	5.43196	2.14547	2.20729	6.03485	5.93253	3.05971	3.20202	4.42891	4.37868	4.08497	5.13016
3.4	6.2291	5.03509	2.11293	2.21171	5.5862	6.2291	3.08158	2.78375	3.97462	4.04833	3.9115	4.74644
3.5	5.92141	5.24963	2.21054	2.15759	5.81027	5.92141	3.00805	3.00026	4.07874	3.90793	3.90232	5.0664
3.6	6.17822	5.20851	2.18668	2.04109	5.83439	6.17822	2.91323	3.07973	4.18457	4.04113	3.96722	4.94393
3.7	5.74255	5.03252	2.14059	2.12288	5.76281	5.74255	2.98549	3.11517	4.06015	3.89166	4.14161	4.9181
3.8	5.67167	5.05279	2.20698	1.98923	5.4566	5.67167	3.16255	2.98067	3.67537	3.75887	4.01525	5.10768
3.9	6.44247	5.26337	2.21316	2.07295	5.59603	6.44247	3.03903	2.95885	4.11273	4.85886	3.84308	4.93491
5.1	6.7241	5.07993	2.14793	2.03999	5.62006	6.7241	3.00972	3.11709	3.90417	4.47884	3.71819	4.94949
4.1	6.38344	5.04251	2.2214	2.06914	5.50019	6.38344	2.82603	2.81963	3.85757	4.7292	3.81483	4.73626
4.2	5.63092	5.42603	2.23985	2.1403	5.99993	5.63092	2.9328	2.86164	4.09208	4.09598	3.60892	5.0002
4.3	5.95527	5.20107	2.18327	2.08266	6.01692	5.95527	2.72309	3.06947	4.27597	4.19053	3.75203	5.01891
4.4	5.64164	5.25479	2.24756	2.08589	6.34818	5.64164	2.89887	2.83585	4.51818	3.87435	3.86226	4.56234
4.5	5.8014	5.19095	2.18907	2.09989	6.14933	5.8014	3.07235	2.93228	4.34016	4.13799	3.96194	4.66707
4.6	5.87249	5.22692	2.18101	2.02911	6.04179	5.87249	3.07125	2.91683	4.36794	3.70061	3.99347	4.88019
4.7	6.2507	5.16218	2.16914	2.03517	6.1413	6.2507	3.00314	2.87731	4.51942	4.02772	4.05863	4.90673
4.8	5.5698	5.11477	2.33565	2.11619	6.39422	5.5698	2.81854	3.06757	4.44135	4.23785	3.67305	5.04448
4.9	5.43824	5.37991	2.22382	2.09397	6.43018	5.43824	2.99132	2.92116	4.61093	4.04892	4.04338	4.90179
5.2	6.12953	5.29627	2.28281	2.1475	6.37485	6.12953	2.93676	3.02917	4.42783	4.433	3.74368	4.93834
5.3	5.68638	5.32358	2.26509	2.17875	6.45826	5.68638	2.99539	2.88856	4.51067	3.83724	3.89855	4.86263
5.4	6.02151	5.47121	2.20334	2.11327	6.90401	6.02151	2.76593	3.07322	4.56912	4.3114	3.72545	5.18639
5.5	5.84842	5.41115	2.41056	2.10966	6.03233	5.84842	2.8368	3.00568	3.72704	3.92846	3.7842	4.81428
5.6	6.09324	5.26435	2.15642	2.17864	6.34492	6.09324	2.84163	2.89908	4.40597	4.33099	3.9184	4.85483
5.7	6.51326	5.17231	2.15505	2.12362	6.04111	6.51326	3.02481	3.13648	4.35373	4.59859	3.60892	4.87599
5.8	6.46033	5.30514	2.1441	2.13268	6.35537	6.46033	3.04094	2.97104	4.40197	4.1807	3.88687	4.65444
5.9	6.44862	5.10708	2.2115	2.15466	5.85489	6.44862	2.82273	2.95422	4.03653	4.50982	3.67954	4.85092
6	6.18832	5.35784	2.18602	2.10263	6.15025	6.18832	2.98498	2.93185	4.26434	4.15754	3.69003	4.90184
6.1	6.89011	5.18403	2.12981	2.09675	6.44902	6.89011	3.12233	2.99173	4.41413	4.24306	3.61961	4.84478
6.2	7.04096	5.02471	2.16934	2.06928	6.21387	7.04096	3.0155	2.94925	4.39475	4.64504	3.89864	4.96446
6.3	6.19724	5.40624	2.19564	2.16718	6.721	6.19724	2.99486	2.81029	4.85022	4.2211	3.69682	4.75365
6.4	6.46889	5.21864	2.20356	2.11094	6.57362	6.46889	3.02779	2.89122	4.33689	4.50745	3.95275	4.74808
6.5	6.30846	5.37004	2.1799	2.08928	6.55797	6.30846	3.04478	3.0465	4.44284	4.31126	3.92915	4.98732
6.6	5.65128	5.11322	2.16947	2.06073	6.50162	5.65128	2.9678	3.02345	4.45413	3.88854	3.93534	4.73787
6.7	5.72668	5.38979	2.20419	2.13904	6.96131	5.72668	2.99464	2.98632	4.75971	3.74757	4.13159	5.05114
6.8	6.25547	5.22806	2.16246	2.17674	6.2751	6.25547	3.02541	3.03774	4.8658	4.09926	3.82645	4.99402
6.9	6.03019	5.1706	2.18057	2.14871	5.51182	6.03019	2.83549	2.90696	3.95297	4.00328	3.92815	5.00113
7	5.95873	5.29411	2.18171	2.04054	6.20772	5.95873	2.9969	2.84951	4.22743	4.10543	3.8321	4.78252
7.1	6.66607	4.99169	2.17816	2.08442	5.73832	6.66607	2.95214	3.02718	4.32848	4.23745	3.7118	4.63783
7.2	5.97554	5.26748	2.22766	2.03521	5.95913	5.97554	3.08659	3.11941	4.40627	4.04136	4.06917	4.85445
7.3	6.13464	5.30919	2.14479	2.07657	5.91186	6.13464	2.95412	2.85114	3.95567	4.4029	3.71201	4.8921
7.4	6.13422	5.17849	2.22979	2.14234	5.98712	6.13422	2.92419	2.83638	4.10341	4.2824	3.72463	4.7972
7.5	6.06708	5.31473	2.16676	2.09345	5.93598	6.06708	2.91895	3.03212	4.04187	4.26026	3.99435	4.93142
7.6	6.07074	5.53927	2.15681	2.08089	5.99106	6.07074	3.03075	3.03	4.02201	4.05722	3.92445	4.77783
7.7	5.98065	5.60324	2.12409	2.05591	6.14896	5.98065	2.89118	3.12849	3.89439	4.00882	3.72898	4.76586
7.8	6.10166	5.36856	2.12654	2.13627	5.81968	6.10166	2.84816	2.95939	4.02937	4.20939	3.84847	5.03456
7.9	5.97645	5.39632	2.12371	2.14135	5.86141	5.97645	2.89188	2.95709	3.80984	4.27186	3.70809	4.80882
8	6.30942	5.40531	2.1785	2.20313	5.46622	6.30942	3.07806	2.8774	3.77903	4.13593	3.85201	4.71697
8.1	6.34384	5.36322	2.18079	2.17754	5.55789	6.34384	3.10628	2.935	3.83762	4.44655	3.82761	4.89712
8.2	5.73065	5.09231	2.22003	2.16824	5.65121	5.73065	2.7919	3.16639	3.78023	3.94471	3.75089	5.01994
8.3	5.98806	5.12249	2.21891	2.1614	4.91771	5.98806	3.16954	2.93025	3.78717	4.07963	3.91507	4.9006
8.4	5.99126	5.25072	2.21271	2.14508	5.67668	5.99126	2.90672	3.02731	3.90401	3.82917	3.81917	5.01807
8.5	5.7656	5.0967	2.17449	2.18768	6.01288	5.7656	2.99985	3.02637	4.21856	3.86369	3.88515	4.74671
8.6	6.0777	5.34101	2.2089	2.25776	5.76867	6.0777	2.89174	3.06366	3.78098	3.86809	3.83502	4.94421
8.7	5.73811	5.0884	2.19373	2.10064	5.63213	5.73811	2.84704	3.12453	3.96678	3.87993	3.91436	4.90956
8.8	5.96821	5.42794	2.04678	2.16101	5.8066	5.96821	2.99333	3.04815	4.11331	4.07207	4.07616	4.91453
8.9	5.83068	5.13778	2.23638	2.18457	6.03341	5.83068	3.08724	2.94076	4.27752	4.07233	3.80368	4.86146
9	5.53733	5.22114	2.18379	2.16335	5.88209	5.53733	2.90078	3.00644	3.99363	3.79941	3.79548	4.88835
9.1	5.78705	5.15653	2.24944	2.25164	5.38297	5.78705	3.03761	3.02033	3.93134	4.01657	3.97512	4.93919
9.2	6.27193	5.32238	2.20272	2.17808	6.30724	6.27193	2.82118	2.95712	3.92545	4.29211	3.69279	4.81796
9.3	6.03503	5.7764	2.15197	2.14587	6.98378	6.03503	2.72268	3.13885	3.99141	4.09778	3.66851	5.07133
9.4	5.95275	5.2804	2.16772	2.19128	5.69109	5.95275	3.05297	3.15424	4.1045	3.95303	4.00643	4.65421
9.5	6.05314	5.16082	2.21796	2.17868	6.79749	6.05314	3.06193	3.0197	4.92162	4.10296	4.031	4.91737
9.6	5.82432	5.23003	2.19491	2.16112	6.53568	5.82432	3.01919	2.99744	4.57942	3.97316	4.0487	5.02424
9.7	6.31614	5.24923	2.16164	2.18824	6.35431	6.31614	2.94529	2.9675	4.57802	4.12801	4.02409	4.61013
9.8	6.21873	4.9371	2.18655	2.21799	6.30891	6.21873	2.95469	2.91016	4.8061	4.19534	3.82473	4.86963
9.9	6.42702	5.31116	2.15589	2.18593	5.91751	6.42702	3.00953	2.87781	4.13706	4.34098	3.64788	4.86646
10	6.43328	5.5373	2.15293	2.17731	5.73933	6.43328	3.01148	2.92265	3.9579	4.27628	3.84957	4.61539
10.1	6.55127	5.21509	2.29942	2.17576	5.87945	6.55127	2.80548	2.84936	4.5182	4.5534	3.78129	4.66377
10.2	6.32191	5.4428	2.14107	2.15246	6.22194	6.32191	2.96733	2.77723	4.78626	4.24003	4.15593	4.65015
10.3	6.41509	5.21499	2.14657	2.17756	5.53829	6.41509	2.94399	2.99313	4.05898	4.41129	3.99416	4.86458
10.4	6.6254	5.7466	2.22121	2.2397	5.90994	6.6254	2.98986	2.72321	3.90393	4.304	3.87829	4.664
10.5	6.64032	5.66159	2.18746	2.15625	5.73091	6.64032	3.02662	2.84422	4.01549	4.3609	3.86203	4.41509
10.6	5.86728	5.47736	2.19134	2.16942	6.2601	5.86728	2.91405	2.91735	4.31917	4.11927	3.65707	4.85136
10.7	6.07376	5.28655	2.27423	2.21754	6.01006	6.07376	3.06117	2.97379	3.85819	4.26157	3.62084	4.83871
10.8	5.55	5.51628	2.12256	2.22059	5.56486	5.55	3.0761	3.01971	3.90406	3.72345	3.94434	4.90797
10.9	5.98979	4.91086	2.11922	2.25002	5.79103	5.98979	2.96837	3.10287	4.32186	3.99277	4.14899	4.96382
11	5.9562	5.37081	2.14424	2.27117	6.18818	5.9562	2.98864	3.01675	4.37676	4.0482	3.86313	4.92361
11.1	6.23724	5.44437	2.18928	2.31722	5.98888	6.23724	2.91665	2.97755	4.09701	4.42877	3.6925	5.18637
11.2	6.96477	4.96467	2.23366	2.14486	5.68084	6.96477	2.91931	3.00441	4.31561	5.02615	3.75251	4.99275
11.3	6.23341	5.25362	2.21175	2.15751	5.47382	6.23341	2.99121	2.90811	3.94987	4.15949	3.87095	4.76836
11.4	6.61073	5.2355	2.18804	2.14697	5.30892	6.61073	3.05495	2.84149	4.19432	4.67378	3.92519	4.96347
11.5	6.51583	5.45281	2.17256	2.19962	5.8041	6.51583	2.94839	2.92653	4.03264	4.7375	3.79279	4.71138
11.6	6.71545	5.36688	2.13402	2.16336	5.36995	6.71545	3.0079	2.98773	3.54018	4.64644	3.65506	4.90979
11.7	6.57355	5.22884	2.19089	2.09476	4.91594	6.57355	2.97587	3.04683	3.78938	4.54515	3.99509	5.00875
11.8	6.64644	5.49231	2.22457	2.22143	6.28214	6.64644	2.86952	2.95235	4.03627	4.77548	3.56216	4.95466
11.9	6.21263	5.18965	2.14643	2.20412	5.67415	6.21263	2.9719	2.97019	4.03399	4.43018	3.94011	4.77787
12	6.48029	5.04749	2.23185	2.23874	5.62616	6.48029	2.88476	2.96617	3.96647	4.29655	3.87795	4.85871
12.1	6.86372	5.14381	2.18841	2.09696	5.64053	6.86372	2.75897	2.84782	4.08092	4.40212	3.78634	4.67559
12.2	6.63567	5.14225	2.11878	2.19727	5.1341	6.63567	3.00509	2.79171	3.74451	4.23325	3.9486	4.37177
12.3	5.753	5.40341	2.19765	2.14733	5.68268	5.753	2.90065	2.8825	3.93784	3.72241	3.86326	4.95815
12.4	5.97987	5.50957	2.10908	2.18371	5.70716	5.97987	2.99977	2.94469	3.96471	3.90062	3.79125	4.8357
12.5	5.97821	5.71513	2.15166	2.14159	5.92439	5.97821	2.94067	2.99134	3.86766	4.09215	3.79135	4.74338
12.6	5.70312	5.31098	2.15895	2.24376	5.62057	5.70312	2.88133	2.90558	3.81974	3.78054	3.75281	5.0515
12.7	6.15289	5.18986	2.17066	2.18345	5.45207	6.15289	2.82244	3.08175	3.90628	4.08469	3.8037	5.18023
12.8	6.18545	5.20179	2.17719	2.22268	5.85194	6.18545	2.9394	3.06836	4.13819	4.2992	3.87124	4.86172
12.9	5.83312	5.45749	2.13361	2.08963	5.48485	5.83312	3.05647	2.92741	4.03108	3.96577	4.13823	4.9722
13	5.72732	5.58463	2.16515	2.24898	5.85904	5.72732	3.04887	2.92575	4.03656	4.06525	3.71512	4.89689
13.1	6.32636	5.49761	2.25323	2.20254	5.85431	6.32636	2.88596	2.89568	3.89371	4.07742	3.69488	4.8601
13.2	5.92513	5.31147	2.19735	2.17553	5.24899	5.92513	2.85607	3.02627	3.76546	4.03954	3.55948	4.96596
13.3	6.22253	5.26147	2.23627	2.17589	5.77197	6.22253	3.02065	3.00455	3.36918	4.23574	3.62886	5.10121
13.4	6.67223	5.25226	2.16007	2.27802	5.76315	6.67223	3.11136	2.94757	3.89757	4.40691	4.05417	4.86113
13.5	6.26745	5.14069	2.19484	2.16586	5.44409	6.26745	3.04005	3.02187	3.75923	3.93999	3.75915	4.99186
13.6	6.29811	5.31847	2.21592	2.21839	5.90789	6.29811	2.75764	2.97118	3.75324	4.15088	3.51247	4.69703
13.7	5.70991	5.59093	2.17734	2.26381	5.68999	5.70991	2.98429	2.87182	3.89994	4.02126	3.5269	4.72018
13.8	6.08071	5.19398	2.12984	2.14881	5.5667	6.08071	3.04698	2.9082	3.68905	3.92394	3.93542	4.75364
13.9	6.17187	5.08969	2.16883	2.27077	5.68384	6.17187	2.8775	3.08243	4.13657	3.93912	3.92351	5.09366
14	5.94034	5.20886	2.23726	2.22149	5.8552	5.94034	2.94139	2.9953	3.87419	3.87678	3.92254	5.11538
14.1	5.50479	5.35619	2.18894	2.16401	5.96176	5.50479	3.02872	3.12919	4.06513	3.97091	3.8859	4.99029
14.2	6.25942	5.32788	2.14594	2.16533	5.53593	6.25942	3.12636	2.90563	3.99018	4.54063	3.98612	4.82669
14.3	5.03845	5.02653	2.15901	2.23061	5.90228	5.03845	2.9998	3.08447	4.3372	3.93135	3.83959	5.05605
14.4	6.02077	5.06592	2.19248	2.21159	5.39309	6.02077	2.83114	3.14268	3.84107	4.40986	3.83967	4.9504
14.5	6.87327	5.35483	2.1555	2.15893	6.96874	6.87327	2.95092	2.99347	5.15745	5.01615	3.75337	5.02245
14.6	6.26247	5.40764	2.22894	2.20616	7.03221	6.26247	3.0138	3.11624	4.72663	4.74838	3.83209	4.75576
14.7	6.47432	5.81976	2.22284	2.20636	6.94335	6.47432	2.90173	2.92037	4.51378	4.76306	3.91652	4.72275
14.8	6.6465	5.26282	2.15738	2.12174	5.99867	6.6465	2.90839	2.97432	4.31444	5.084	3.78294	4.902
14.9	6.33415	5.33098	2.14337	2.19333	6.25569	6.33415	3.01259	2.83908	4.46638	4.67821	3.98689	4.77484
15	6.26098	5.3121	2.1448	2.20302	5.48911	6.26098	2.99919	3.06072	3.88163	4.5251	3.78562	4.90984
15.1	6.23337	5.28989	2.24808	2.24283	5.90735	6.23337	2.92668	2.94555	4.03458	4.34307	3.69377	4.77007
15.2	6.23004	5.14816	2.19582	2.23659	6.05855	6.23004	3.00913	2.82754	4.30532	4.6503	3.99268	4.72992
15.3	6.5236	5.14998	2.14338	2.12518	6.27245	6.5236	2.96367	2.88719	4.37167	4.53289	3.98389	4.93173
15.4	6.50996	5.39213	2.20345	2.18298	5.63586	6.50996	3.04427	3.00218	4.33415	4.27194	3.85623	4.69419
15.5	7.12185	5.34225	2.24783	2.17972	5.95475	7.12185	2.91799	3.07256	4.04056	5.3401	3.88058	5.06663
15.6	6.32674	5.05439	2.14046	2.21872	5.96666	6.32674	2.95006	2.9773	4.40485	4.41055	3.69252	5.09154
15.7	6.6317	4.99586	2.13621	2.1156	5.6471	6.6317	2.96344	2.93976	4.00059	4.40625	3.72086	4.87576
15.8	6.14861	5.43604	2.17109	2.18413	6.43027	6.14861	2.85133	2.96387	4.60128	4.22936	3.90531	4.96568
15.9	6.3418	5.33387	2.16837	2.24375	6.59559	6.3418	3.1184	3.0414	4.4729	4.58716	3.92213	4.71927
16	6.66575	5.43055	2.14777	2.24565	6.31454	6.66575	3.04923	2.93477	4.4716	4.345	3.75808	4.84546
16.1	5.66432	5.28003	2.14401	2.24301	6.5282	5.66432	3.01579	2.92671	4.68792	3.98174	3.9979	4.95902
16.2	5.65461	5.34657	2.15725	2.13647	5.74947	5.65461	3.04515	3.14573	3.882	4.5512	3.99804	5.16648
16.3	6.53915	5.1441	2.22251	2.26101	5.40883	6.53915	3.08326	3.12782	3.80022	4.69519	3.89069	4.92309
16.4	5.54629	5.12169	2.22237	2.19965	6.1075	5.54629	2.98014	3.0442	4.39873	3.89238	3.89592	4.8414
16.5	6.06375	5.46848	2.2357	2.13933	6.19293	6.06375	3.03141	3.02569	4.09488	4.4321	3.99835	4.89949
16.6	5.72919	5.1757	2.15171	2.26374	5.96318	5.72919	2.85677	3.09571	4.44134	4.18876	3.78819	4.70958
16.7	6.3087	5.03439	2.21265	2.18102	5.85084	6.3087	3.12108	3.14704	4.31185	4.59839	3.85906	4.95797
16.8	6.1819	5.03603	2.19219	2.12152	5.61062	6.1819	3.12527	2.89028	3.94246	4.50664	3.79467	4.86451
16.9	6.40315	5.15968	2.18904	2.09684	6.06837	6.40315	2.97421	3.17922	4.4236	4.68546	3.76077	5.22034
17	6.0441	5.28777	2.1313	2.18552	6.33502	6.0441	3.03615	2.93868	4.56065	4.43103	3.7666	4.87462
17.1	5.69785	5.19682	2.09498	2.22924	6.32913	5.69785	2.98257	3.1441	4.8731	4.66223	3.64925	5.03964
17.2	6.15534	5.29643	2.12706	2.11505	6.7199	6.15534	2.9204	3.13796	4.76828	4.68679	3.83963	4.94212
17.3	5.17526	5.38832	2.14615	2.15339	6.30258	5.17526	2.93391	3.24088	4.06273	3.65801	3.60473	5.00622
17.4	6.70425	6.6846	2.07983	2.20315	7.42422	6.70425	3.02576	2.7999	4.14975	4.41953	3.54653	4.7131
17.5	6.6726	6.6636	2.06533	2.2224	6.93306	6.6726	2.98127	2.86167	4.21761	4.36512	3.65141	4.71886
17.6	5.77383	6.03025	2.1766	2.17898	8.21799	5.77383	3.08121	2.91473	4.85618	4.21727	3.60978	4.83751
17.7	6.59708	6.36955	2.08831	2.19739	8.00482	6.59708	3.05573	3.05455	4.14898	4.64781	3.81817	5.07761
17.8	6.23945	6.3298	2.14486	2.18698	7.84697	6.23945	2.86598	3.12049	3.97124	4.35945	3.71248	4.95449
17.9	6.11113	6.60525	2.09407	2.17667	7.32162	6.11113	2.95864	2.8171	4.28105	4.2591	3.6697	4.868
18	5.81959	6.3495	2.05431	2.23667	8.0889	5.81959	2.88204	2.96104	4.20791	4.05879	3.66236	4.85253
18.1	6.35149	6.0438	2.11409	2.12309	8.18248	6.35149	2.9985	3.13908	4.42732	4.39938	3.67196	4.53575
18.2	6.22311	6.3687	2.18921	2.19902	7.81576	6.22311	2.94792	2.95113	4.1003	4.20655	3.70964	4.5499
18.3	6.14358	6.02085	2.14906	2.10432	7.91852	6.14358	3.00238	3.08401	4.37605	4.62631	3.57887	5.1127
18.4	6.33902	6.9114	2.24206	2.16811	7.43814	6.33902	2.95248	2.87378	4.19649	3.86429	3.91435	5.07761
18.5	6.45378	6.06605	2.2237	2.13033	7.92997	6.45378	3.00032	3.0159	4.25317	4.62526	3.617	4.89982
18.6	6.92411	6.0868	2.23814	2.15065	7.89389	6.92411	3.07341	3.11214	4.4561	4.94555	4.00359	4.98639
18.7	5.78219	6.15715	2.1718	2.20349	8.22457	5.78219	3.17813	3.05871	4.72596	3.96728	3.74457	5.08814
18.8	5.8932	6.14405	2.29487	2.24812	8.14406	5.8932	2.652	3.00305	4.3986	3.9905	3.70848	5.03338
18.9	5.84859	6.7594	2.17199	2.14592	7.49834	5.84859	2.85642	3.07848	4.27014	4.1711	3.71486	4.98418
19	6.2389	6.12945	2.2265	2.17724	7.99757	6.2389	2.96552	2.94405	4.43008	3.96788	3.73847	4.56676
19.1	5.71731	6.46385	2.17657	2.13396	8.23708	5.71731	3.00521	3.01544	4.18033	4.03707	3.78787	4.963
19.2	5.88844	6.39555	2.16637	2.12771	8.36412	5.88844	2.94569	3.04061	4.37653	4.0161	3.59196	4.86374
19.3	5.94534	6.25305	2.25548	2.16336	8.26181	5.94534	2.84348	3.12226	4.20068	4.12372	4.01375	5.00664
19.4	6.38511	6.2846	2.11334	2.26577	8.10302	6.38511	2.88617	3.02302	4.32095	4.28712	3.98684	4.77983
19.5	5.68974	6.5451	2.28802	2.1906	8.30612	5.68974	2.85242	2.97677	4.18511	4.05191	3.92456	4.73136
19.6	6.22417	6.76135	2.34034	2.24505	7.0252	6.22417	3.00065	3.04791	4.02424	3.85813	3.84364	4.94935
19.7	6.85644	6.0389	2.36388	2.13946	7.81907	6.85644	2.86205	2.93851	4.23969	4.49402	3.85248	4.94097
19.8	6.50198	6.6172	2.36064	2.16653	8.21683	6.50198	3.09405	2.99021	4.37168	4.4193	3.11646	5.07745
19.9	6.20745	6.97635	2.30911	2.21799	7.45392	6.20745	2.6658	2.96925	3.71407	4.18916	3.66751	4.70926
20	6.49998	6.4867	2.34039	2.09313	8.3925	6.49998	2.90953	3.15841	4.24526	4.64288	3.69307	5.0292
20.1	6.18651	6.25075	2.20796	2.21197	7.82901	6.18651	2.81357	3.06147	3.83429	4.23346	3.67892	4.74873
20.2	6.41141	6.2697	2.20893	2.18954	8.33751	6.41141	2.97381	3.11212	4.3472	4.47048	3.8514	4.80646
20.3	6.45019	6.98115	2.20488	2.18248	8.12485	6.45019	2.94909	2.81348	4.28454	4.65032	3.56474	4.70451
20.4	6.56741	6.1999	2.1913	2.179	8.13063	6.56741	2.79323	3.05905	4.36503	4.1855	3.54168	4.67772
20.5	6.39215	6.47345	2.12195	2.29141	6.98017	6.39215	2.79306	2.93793	4.24981	4.48597	3.49051	4.96619
20.6	6.72636	6.71735	2.21875	2.16982	7.2066	6.72636	3.05509	2.97477	4.20009	4.75131	3.65977	4.67113
20.7	6.1543	6.23895	2.23432	2.15828	8.43909	6.1543	2.97015	2.82667	4.58455	4.16512	3.67242	4.63941
20.8	6.10479	6.23335	2.31412	2.25632	7.99073	6.10479	2.89024	2.91589	4.35339	4.21166	3.74801	4.7985
20.9	5.94143	6.1333	2.16202	2.2432	7.91423	5.94143	3.14036	3.02168	4.30626	3.98181	3.70425	4.87837
21	5.91277	6.40505	2.22617	2.17018	7.94691	5.91277	2.80141	2.89562	4.39468	3.81081	3.31189	4.63152
21.1	6.02414	6.84725	2.137	2.18546	7.50474	6.02414	2.86603	2.98737	4.04501	3.87162	3.81022	4.58054
21.2	6.10127	6.00105	2.29647	2.14742	6.89283	6.10127	2.81334	2.83792	4.15897	3.87987	3.60552	4.81562
21.3	6.71589	6.2674	2.10961	2.18859	7.40864	6.71589	2.72439	2.92558	4.01177	4.33052	3.59113	4.76675
21.4	6.79738	6.2439	2.21176	2.22234	8.09559	6.79738	2.92964	2.74153	4.15979	4.03951	3.38112	4.47049
21.5	6.46055	6.52395	2.24591	2.15903	8.13359	6.46055	2.87966	3.16337	4.50474	4.16188	3.58192	4.87533
21.6	6.41449	6.4369	2.17213	2.2205	8.17098	6.41449	2.86181	3.02523	4.25654	3.94186	3.40379	4.7064
21.7	6.90053	6.03195	2.18072	2.1519	7.4508	6.90053	3.03084	3.02959	4.26413	4.74831	3.54213	4.83918
21.8	6.54695	6.9671	2.19118	2.20928	7.80532	6.54695	3.18144	3.08682	4.4215	4.45098	3.71522	5.13157
21.9	6.58665	6.1392	2.11415	2.18442	7.76787	6.58665	2.73025	3.06944	3.85084	4.31003	3.5174	4.74458
22	6.65139	6.44335	2.17116	2.20493	7.94315	6.65139	2.84258	2.8998	4.29739	4.37974	3.83654	4.75963
22.1	6.26736	6.033	2.24737	2.19319	7.4352	6.26736	2.80748	2.97207	4.46756	4.2245	3.74277	5.18744
22.2	5.93884	6.4182	2.2292	2.20582	7.88992	5.93884	2.90335	3.13541	4.03488	4.01731	3.62317	4.87322
22.3	6.23298	6.54895	2.21358	2.18326	8.54545	6.23298	2.99381	3.21948	4.26016	4.00777	3.99286	4.86247
22.4	5.9425	6.0498	2.17663	2.1755	7.73982	5.9425	3.00827	3.08514	4.28737	3.89951	3.78247	5.06271
22.5	6.3782	6.61755	2.28287	2.23344	8.64818	6.3782	3.06363	2.95649	4.22551	4.40766	4.02569	4.83282
22.6	6.61708	6.0852	2.15811	2.21996	8.18463	6.61708	2.76552	2.97277	4.32779	4.28771	3.81461	4.83033
22.7	6.1388	6.1492	2.19346	2.19592	8.24088	6.1388	3.01209	3.04164	4.36033	4.2054	3.9887	4.95115
22.8	6.28552	6.20795	2.15308	2.26679	7.49576	6.28552	2.91567	2.8822	4.17394	4.24281	4.04387	4.74772
22.9	6.48146	6.7057	2.14674	2.2256	7.13251	6.48146	2.86443	2.93273	3.7778	4.31869	3.39859	4.77397
23	6.48832	6.7246	2.18112	2.20419	8.71787	6.48832	2.80873	3.07696	4.39935	4.3647	3.87246	5.06023
23.1	6.02482	6.56525	2.18605	2.10176	9.09267	6.02482	2.93433	3.10765	4.82631	3.93099	3.71155	4.97982
23.2	6.5234	6.27645	2.1254	2.18009	9.31033	6.5234	2.90227	3.16505	5.1127	3.9566	3.63873	4.9283
23.3	5.90893	6.8049	2.25745	2.21809	8.42838	5.90893	2.6771	3.17412	4.61566	3.97693	3.524	5.00131
23.4	5.59939	6.75885	2.22662	2.08067	7.87059	5.59939	3.01616	3.10316	4.52212	3.78783	3.64618	5.06041
23.5	6.01487	6.0086	2.22995	2.17978	7.92027	6.01487	2.94455	2.9966	4.51034	3.86808	3.64651	4.90054
23.6	5.61245	6.2563	2.25624	2.14057	7.30288	5.61245	3.08709	3.03854	3.91886	3.99054	3.72209	4.99364
23.7	5.8651	6.49825	2.16707	2.14375	8.85314	5.8651	3.00467	3.17777	3.96073	3.77373	3.39454	4.8327
23.8	5.99535	6.41735	2.16207	2.12002	8.87729	5.99535	2.90838	3.10439	4.47366	4.05804	3.50831	5.02173
23.9	5.24566	6.32895	2.20339	2.1054	8.67425	5.24566	2.90352	3.07286	4.46212	3.70632	3.95382	4.83078
24	6.42673	6.2552	2.19867	2.23594	8.35104	6.42673	3.16545	2.97641	4.71398	4.16141	3.69668	4.75227
24.1	6.03783	6.29755	2.13904	2.12388	8.34058	6.03783	2.89433	3.08238	4.8355	4.31806	3.57732	4.76501
24.2	6.30047	6.90995	2.21394	2.14681	7.58204	6.30047	2.77228	2.89522	4.36972	4.01072	3.41067	4.85213
24.3	6.33045	6.06985	2.20453	2.20591	7.95867	6.33045	2.84076	3.08208	4.61035	4.07545	3.53121	4.70676
24.4	6.01638	6.7878	2.24516	2.15632	7.79829	6.01638	2.91696	2.95718	4.47935	3.93695	3.97138	4.89771
24.5	7.0031	6.247	2.17306	2.2513	7.99084	7.0031	3.04558	2.93351	4.03872	4.69888	3.92744	4.90829
24.6	6.09748	6.21025	2.19738	2.15015	7.06817	6.09748	3.04603	2.9967	4.2016	4.10755	3.86053	4.9413
24.7	6.07073	6.00945	2.19542	2.15718	6.9112	6.07073	2.95845	3.00803	4.5495	4.1708	3.90672	5.04387
24.8	6.28377	6.16895	2.23169	2.19376	7.2421	6.28377	3.05276	2.94577	4.32307	3.99751	3.8257	4.82231
24.9	5.88823	6.6284	2.26578	2.15566	7.03198	5.88823	2.98131	3.02916	4.48681	4.2394	3.8132	5.06332
25	6.23406	6.0305	2.23701	2.11888	6.85319	6.23406	2.82457	3.00382	3.97898	3.8439	3.89624	5.08003
25.1	5.80482	6.19225	2.20504	2.14483	6.64358	5.80482	2.83239	3.03626	4.69041	3.83264	3.74811	5.09807
25.2	6.28879	6.42465	2.23808	2.20474	6.67452	6.28879	3.14169	2.93281	4.37872	4.10512	3.4468	4.73517
25.3	6.19236	6.1123	2.34799	2.11868	6.68091	6.19236	2.8321	2.93036	4.44853	3.92983	3.81289	4.98478
25.4	6.38788	6.57885	2.25929	2.14091	6.67837	6.38788	2.97765	2.80214	4.53687	4.2824	4.05205	4.63241
25.5	5.7935	6.3325	2.18536	2.08391	6.1798	5.7935	2.92274	3.07015	4.25214	3.79054	4.18287	5.07587
25.6	5.79279	6.55615	2.37251	2.19469	7.35097	5.79279	2.86244	2.9489	4.74582	3.91583	3.9044	4.95951
25.7	5.6643	6.10815	2.28142	2.19929	6.25717	5.6643	2.88654	3.16621	4.29348	3.79541	3.67073	5.11741
25.8	5.92028	6.4218	2.24853	2.19125	6.73355	5.92028	2.81343	2.94372	4.55985	3.85557	3.86819	5.11668
25.9	6.1085	6.2905	2.24907	2.08142	7.29704	6.1085	2.85499	3.08139	4.35119	3.97195	3.80933	5.00688
26	6.05793	6.2164	2.1992	2.18044	7.38598	6.05793	2.89384	2.99174	4.96709	3.71115	4.03896	4.93989
26.1	6.51492	5.92799	2.35101	2.15687	7.08113	6.51492	2.73496	3.0595	4.3872	4.26699	3.87542	4.8508
26.2	6.54066	5.23914	2.1534	2.13266	6.53262	6.54066	3.0899	2.98629	4.6143	4.35327	3.97434	4.90065
26.3	6.45215	4.89193	2.14967	2.14528	6.18762	6.45215	2.94311	3.04764	4.46237	4.06527	3.70125	4.8544
26.4	6.28604	5.14755	2.16718	2.18232	6.06133	6.28604	3.01184	2.94415	4.71873	4.00871	3.74309	4.79665
26.5	5.48517	5.48911	2.1187	2.10039	6.47584	5.48517	3.0568	2.93451	4.18192	3.84067	3.9881	4.732
26.6	6.21534	5.48573	2.20057	2.13571	6.47333	6.21534	2.81304	2.78132	4.09741	4.09927	3.59588	4.76827
26.7	6.18565	5.32662	2.18403	2.16079	6.06463	6.18565	3.04463	2.91085	4.09263	3.99894	3.96761	4.88692
26.8	6.03648	5.37453	2.14399	2.12766	5.73285	6.03648	2.87104	2.88623	3.80393	4.17959	3.77793	5.00736
26.9	5.86085	5.31047	2.1996	2.14143	6.5946	5.86085	2.95121	2.86345	4.4176	3.97015	3.80141	5.00631
27	5.75199	5.1734	2.21569	2.19737	5.53989	5.75199	3.22182	3.03362	3.81847	3.83598	3.99832	5.05182
27.1	6.36568	5.48846	2.17446	2.21861	6.86716	6.36568	3.00534	3.03415	4.8396	4.39239	3.91638	4.74671
27.2	6.06599	5.28482	2.1662	2.22906	6.42633	6.06599	3.01675	2.97853	3.95433	4.06798	3.73366	4.84916
27.3	6.13378	5.48257	2.09179	2.19511	5.99388	6.13378	2.75344	3.11964	3.84304	4.02671	4.01338	4.8772
27.4	6.0964	4.97993	2.2056	2.20112	6.19466	6.0964	2.9788	2.94456	4.44142	4.13227	3.63702	5.06822
27.5	5.8968	5.14987	2.12034	2.19694	5.86965	5.8968	2.94997	2.86822	4.07998	4.08181	4.101	4.73717
27.6	6.34835	5.02234	2.10923	2.19677	5.66969	6.34835	3.10648	3.1091	4.07052	4.24848	3.57263	5.05929
27.7	6.14815	5.32606	2.20239	2.21612	6.32111	6.14815	2.80441	3.11129	3.94936	4.40484	3.70626	5.07187
27.8	6.38663	4.94571	2.14561	2.12786	5.68527	6.38663	2.97487	2.92867	4.06951	4.3865	3.79143	5.00261
27.9	5.64482	5.19029	2.22849	2.17633	5.52522	5.64482	2.91771	3.05609	4.00686	3.76959	3.69158	4.77901
28	5.62221	5.35255	2.30833	2.16545	6.47421	5.62221	2.96997	2.91133	4.12724	3.98076	3.96153	4.97145
28.1	6.29678	5.03406	2.20262	2.26996	5.85119	6.29678	2.80613	3.13687	4.2135	4.36776	4.01673	4.90314
28.2	6.55644	5.15485	2.161	2.1637	5.29898	6.55644	3.10514	3.02596	3.96703	4.3705	4.04316	4.62613
28.3	6.14039	5.38715	2.26112	2.18696	5.61361	6.14039	2.9767	2.92508	3.78045	3.99232	3.77984	4.59707
28.4	6.14715	5.27111	2.26909	2.18427	5.6823	6.14715	2.8988	3.03974	3.91036	3.93945	3.79682	4.74271
28.5	5.98163	5.28407	2.21484	2.09025	6.37708	5.98163	2.9717	2.96432	4.24586	4.17309	3.65448	4.86977
28.6	5.91317	5.22595	2.18282	2.17679	6.00807	5.91317	2.94813	3.08874	3.85373	4.00323	3.83524	5.09319
28.7	5.91127	5.20031	2.23872	2.25352	5.998	5.91127	2.82888	3.04868	3.65544	3.9942	3.49925	4.92218
28.8	6.10604	4.93158	2.12787	2.12513	6.23581	6.10604	3.07105	2.96219	4.31187	3.74565	3.91599	4.92896
28.9	6.10403	5.44691	2.14952	2.16261	6.4853	6.10403	2.98665	3.04532	4.51552	3.95896	3.66924	4.7239
29	6.69022	5.10291	2.26009	2.26441	6.0139	6.69022	2.95727	3.06487	4.13652	4.56391	3.71968	4.83857
29.1	6.1022	5.08523	2.08581	2.20693	6.2733	6.1022	3.06303	2.89595	4.29464	4.37214	3.71248	4.97898
29.2	5.85972	5.2535	2.15779	2.22741	6.00314	5.85972	2.94279	3.08812	4.15493	3.81596	4.11746	4.96199
29.3	6.19926	5.18079	2.21813	2.19525	5.59662	6.19926	2.94986	3.07713	3.99491	4.18874	3.92148	4.85839
29.4	6.2367	5.1855	2.18312	2.24809	5.89167	6.2367	2.83419	3.04556	4.064	4.00049	3.71467	5.22406
29.5	6.53414	5.51026	2.11543	2.1046	5.93254	6.53414	2.85419	3.23149	3.9817	4.16855	3.71086	4.63795
29.6	6.3611	5.22654	2.21563	2.17485	5.80004	6.3611	3.0392	2.88485	3.91083	4.21889	3.73017	5.05717
29.7	6.76416	5.32442	2.09428	2.18085	5.60463	6.76416	2.9919	3.03728	3.99078	4.60473	3.82551	4.95978
29.8	6.5831	5.3326	2.24931	2.22458	6.35381	6.5831	3.00043	3.13922	3.95717	4.45976	3.62241	4.71478
29.9	6.78181	5.38869	2.15935	2.22001	5.83068	6.78181	2.97757	2.72937	3.90651	4.48278	3.94979	4.6886
30	7.4221	5.15939	2.20802	2.21062	6.12651	7.4221	2.77376	3.00784	4.13486	4.70932	3.5826	4.77766
30.1	6.21	5.16306	2.24676	2.17413	5.49679	6.21	2.94551	3.08138	4.03643	4.34753	3.82485	4.78243
30.2	6.44271	5.09122	2.15299	2.13944	5.77184	6.44271	3.08944	2.96591	4.21938	4.19352	3.85028	4.69792
30.3	6.73714	5.19168	2.16303	2.20008	6.29002	6.73714	2.85338	2.97398	4.28267	4.39457	3.63004	4.71863
30.4	6.2777	5.2484	2.17114	2.16824	6.10213	6.2777	2.98036	2.99755	4.18296	4.14381	3.56812	4.90275
30.5	6.70125	5.33828	2.23257	2.18336	6.31108	6.70125	3.06442	3.15558	4.48588	4.70697	3.8142	4.97149
30.6	6.24754	5.09689	2.22083	2.2012	5.80706	6.24754	2.89867	3.03516	4.11231	4.34325	3.67833	4.83934
30.7	5.92823	5.03446	2.18217	2.20415	5.91603	5.92823	3.03437	3.11639	3.99972	4.18112	3.63808	4.97367
30.8	6.66904	5.23716	2.20191	2.17053	6.61953	6.66904	3.02828	3.05202	4.64611	4.66847	3.58861	5.09172
30.9	6.39745	5.30673	2.32463	2.23702	6.52542	6.39745	3.07648	2.85127	4.60968	4.36465	3.91649	4.77517
31	6.08805	5.14142	2.184	2.20587	7.29927	6.08805	2.98306	3.04534	5.38725	4.03779	3.95693	4.83521
31.1	6.41591	5.24026	2.25023	2.16459	6.97259	6.41591	2.87488	3.11971	5.12155	4.03392	3.75199	4.98681
31.2	6.39726	5.10759	2.23475	2.15541	6.31018	6.39726	2.88484	3.03405	4.73745	4.57552	3.74866	5.08931
31.3	6.32997	5.13338	2.21955	2.23056	6.43168	6.32997	2.85275	2.90239	4.98102	4.22333	3.82616	4.89161
31.4	6.08525	5.47457	2.21287	2.11598	7.01359	6.08525	2.9652	2.98773	4.93362	4.27704	3.81853	5.00231
31.5	6.05537	5.31213	2.18741	2.34259	6.6137	6.05537	2.84934	2.92549	4.81491	3.78591	3.87923	4.77857
31.6	6.46781	5.43013	2.26345	2.27481	6.84471	6.46781	3.05166	2.91333	5.127	4.61329	3.89172	4.89493
31.7	5.5335	5.53564	2.19954	2.09408	7.16487	5.5335	2.8792	3.03621	4.90175	4.07661	3.70196	4.86885
31.8	6.27693	5.4801	2.27469	2.16669	6.39299	6.27693	3.06245	3.1951	4.41442	4.00225	3.81886	5.03548
31.9	6.2972	5.30701	2.15976	2.13562	6.37446	6.2972	2.89016	3.19078	4.24369	4.04446	3.68646	5.05475
32	6.41251	5.28646	2.19204	2.19364	6.41639	6.41251	3.01667	3.06517	4.1441	4.24512	3.78206	4.93635
32.1	6.36174	5.44635	2.21976	2.15038	6.9208	6.36174	3.02799	2.91118	4.47147	4.29352	3.82691	4.89714
32.2	6.55149	5.29012	2.13565	2.24137	6.60285	6.55149	3.11053	2.97748	4.25762	3.97572	3.90062	4.74538
32.3	6.14311	5.36971	2.25436	2.17955	6.69792	6.14311	2.88479	3.06891	4.34398	4.05051	3.54575	4.88631
32.4	6.66434	5.2089	2.19701	2.13086	6.91873	6.66434	2.88856	2.86943	4.74678	4.55983	3.71688	4.98933
32.5	5.96745	5.43295	2.19199	2.14696	6.76473	5.96745	2.95513	2.94842	4.59459	4.03785	3.7374	4.96711
32.6	6.53123	5.41042	2.1909	2.18917	6.0903	6.53123	2.96983	2.92627	4.18828	4.25967	3.83432	4.53441
32.7	6.45608	5.33825	2.25964	2.17473	6.20338	6.45608	3.02838	2.85403	4.38417	4.04549	3.87202	4.99115
32.8	5.28776	5.51089	2.2659	2.14271	6.3674	5.28776	2.92205	2.98449	3.96877	3.83564	3.63855	5.07216
32.9	5.44749	5.29593	2.25035	2.19538	6.57557	5.44749	2.9936	3.02022	3.94818	3.57947	3.61283	4.96502
33	5.69102	5.1702	2.17971	2.22092	6.06328	5.69102	3.0981	3.07685	4.21888	3.61266	4.05557	4.9822
33.1	5.86126	4.90057	2.13085	2.13855	7.042	5.86126	2.9539	3.07933	5.43375	4.00049	3.64249	5.03772
33.2	6.21063	5.61698	2.07494	2.24603	7.26571	6.21063	2.8436	3.09459	4.77393	3.77215	3.88593	5.09689
33.3	5.99597	5.42495	2.17867	2.16961	7.26458	5.99597	2.84627	2.99892	4.98589	4.08987	3.65309	5.09433
33.4	6.22803	5.56654	2.20194	2.24076	6.83581	6.22803	2.84077	3.04644	4.36747	3.88329	3.89591	4.8193
33.5	6.18766	5.21233	2.15361	2.19454	6.63773	6.18766	3.00047	2.87894	4.7758	4.33157	3.85661	4.95578
33.6	6.17838	5.6008	2.19664	2.15789	6.28163	6.17838	3.02194	2.87839	4.44266	4.24769	3.84986	4.89077
33.7	5.96915	5.56583	2.09866	2.16343	7.16881	5.96915	2.89988	3.05495	4.97809	4.28728	3.90723	5.03342
33.8	6.35278	5.09312	2.14961	2.12618	6.18287	6.35278	2.96875	2.86721	4.58099	4.49573	4.05255	4.9442
33.9	6.15287	6.8596	2.21472	2.18628	7.90808	6.15287	2.78577	2.9314	4.30967	4.19139	3.64574	4.75342
34	5.72546	6.14605	2.13512	2.2008	8.07305	5.72546	2.80553	2.95119	4.39267	4.04474	3.46892	4.85449
34.1	5.98218	6.07735	2.13089	2.15895	8.68511	5.98218	2.88786	2.94467	4.69967	4.43889	4.08249	5.05635
34.2	5.8136	6.6979	2.14812	2.14287	9.06798	5.8136	3.02028	2.89159	4.68578	3.88947	3.72896	4.96967
34.3	5.50495	6.00365	2.24967	2.17724	7.07102	5.50495	3.21838	2.97445	4.84375	3.99859	4.17114	5.01461
34.4	6.18255	6.799	2.11922	2.0677	8.17332	6.18255	2.99221	2.82918	4.69341	4.35546	3.90004	4.96732
34.5	5.62625	6.9188	2.24648	2.14363	8.31255	5.62625	2.82163	3.01805	4.83235	4.31173	3.60486	5.19637
34.6	6.1662	6.24235	2.14149	2.29771	7.06787	6.1662	3.02289	3.06532	4.52562	4.43914	3.6931	5.13209
34.7	6.15208	5.43783	2.12968	2.22988	6.83239	6.15208	3.11499	2.98801	4.69212	4.38743	3.73505	4.96403
34.8	6.33211	5.62836	2.13876	2.22736	7.27618	6.33211	3.00245	3.06052	5.15915	4.20279	3.65453	5.07001
34.9	5.96207	5.58714	2.142	2.22233	7.21235	5.96207	2.92153	2.90631	4.79755	3.92746	3.89956	4.85267
35	5.88051	5.56698	2.25897	2.24171	6.77559	5.88051	3.09223	3.15449	4.75009	4.28712	3.66981	4.94743
35.1	5.99149	5.22959	2.19104	2.19552	5.99515	5.99149	2.97286	2.92342	4.12334	4.02713	4.13302	4.80445
35.2	6.46882	5.28923	2.23632	2.15217	6.20494	6.46882	3.03385	2.88412	4.01462	4.26293	3.7154	4.97461
35.3	6.26596	5.78815	2.16131	2.21391	6.61039	6.26596	2.94639	2.88664	4.0755	4.30237	3.70391	4.82134
35.4	6.81351	5.38408	2.26212	2.25627	6.92416	6.81351	2.80927	2.84365	4.49559	4.54233	3.53251	4.91925
35.5	6.19072	5.00002	2.11301	2.20539	6.38957	6.19072	2.93729	2.86853	4.50892	4.29244	3.61347	4.91027
35.6	6.44821	5.18898	2.26331	2.18959	6.51341	6.44821	2.81931	2.94124	4.34861	4.72898	3.57467	5.24081
35.7	5.87429	5.46089	2.08821	2.23793	7.10101	5.87429	3.2328	3.13702	4.86727	4.23294	3.87973	4.97678
35.8	6.63283	5.34798	2.13533	2.20309	6.81513	6.63283	3.08069	3.16777	4.75272	4.08462	3.91167	4.92656
35.9	6.67759	5.32469	2.17407	2.16428	7.34166	6.67759	3.06895	2.90694	5.0393	4.61913	3.95621	4.77475
36	6.54809	5.29002	2.11884	2.17036	6.98105	6.54809	3.03005	2.80427	4.6957	4.31607	3.80674	4.94557
36.1	6.09657	5.21577	2.24648	2.19831	6.89559	6.09657	2.88149	3.00927	4.95807	4.09053	3.78404	4.86193
36.2	6.62238	5.21646	2.20485	2.18524	6.97785	6.62238	2.92896	3.15145	4.97342	4.54458	3.95519	5.11184
36.3	6.26203	5.198	2.18682	2.17289	7.12158	6.26203	2.81656	2.76819	4.63002	4.25582	3.77671	4.70535
36.4	6.96584	5.14879	2.22247	2.22362	6.564	6.96584	3.0684	2.82281	4.51112	4.55323	4.1123	4.71509
36.5	6.5826	5.34809	2.10018	2.20388	6.54976	6.5826	2.9733	2.92853	4.393	4.51466	3.92829	4.9162
36.6	6.59261	5.12699	2.18487	2.2281	6.96418	6.59261	3.07769	2.89014	4.85145	4.1884	3.93849	4.62319
36.7	6.94146	5.46392	2.19518	2.2281	7.02594	6.94146	2.89614	2.86159	4.572	4.61611	3.71279	4.86383
36.8	6.5583	5.35368	2.17005	2.20399	6.97938	6.5583	3.05336	2.93599	4.70876	4.47694	4.04255	4.76525
36.9	6.98844	5.16139	2.20703	2.28253	7.02756	6.98844	2.78915	2.76142	4.84741	4.47464	3.78441	4.93301
37	6.24331	5.14209	2.22745	2.27428	6.81537	6.24331	3.04415	3.1248	4.83273	4.24978	3.83903	4.73674
37.1	6.80288	5.40537	2.18939	2.1665	6.72464	6.80288	3.16242	2.97539	4.70864	4.56548	4.1997	5.03076
37.2	6.78483	5.10799	2.15995	2.18572	6.79017	6.78483	2.88801	2.89656	4.48698	4.47737	3.7227	4.77133
37.3	6.51111	5.18653	2.22533	2.19118	5.96666	6.51111	2.96316	2.97009	4.21638	4.53976	3.80855	4.79751
37.4	6.78533	5.29725	2.25869	2.14306	7.15029	6.78533	2.89641	2.88646	4.54406	4.55511	3.89672	4.7973
37.5	6.43834	5.45006	2.29369	2.14945	6.99693	6.43834	2.96536	2.92319	4.56141	4.44894	3.96841	5.12404
37.6	6.3537	5.24247	2.19679	2.17039	6.80421	6.3537	2.8973	2.85929	4.81635	3.7958	3.73192	4.60311
37.7	6.18872	5.05009	2.20979	2.22017	6.47229	6.18872	3.03823	2.93407	4.98015	3.81916	3.87897	4.70767
37.8	6.12747	5.37657	2.139	2.21726	6.3167	6.12747	2.88633	2.99973	4.38158	4.18156	4.08079	4.90325
37.9	6.6866	5.18816	2.15347	2.18085	7.07681	6.6866	2.87988	2.94343	4.93185	4.40128	3.72684	4.93236
38	6.24471	5.2037	2.16417	2.26562	7.39018	6.24471	2.81835	2.89384	5.00565	4.35823	4.10693	4.8518
38.1	7.18805	5.15418	2.20059	2.2293	7.2054	7.18805	2.92678	3.11437	4.97018	4.36397	3.82854	4.70584
38.2	6.72072	5.34195	2.22833	2.16738	6.79129	6.72072	3.18778	2.81162	4.39644	4.47181	3.74092	4.64342
38.3	6.09317	5.47698	2.20203	2.1806	6.75511	6.09317	2.94407	3.06094	4.42075	4.01717	3.91774	5.00622
38.4	5.94641	5.38907	2.16534	2.17079	6.41043	5.94641	3.11136	2.9894	4.39711	4.01008	3.9978	4.86416
38.5	6.2564	5.03109	2.14859	2.16131	6.00136	6.2564	3.02339	3.12923	4.26924	4.31009	4.16527	4.68011
38.6	6.10952	5.16768	2.1837	2.19616	6.75263	6.10952	2.98335	2.97763	5.13745	4.0849	4.01895	4.67631
38.7	7.38585	5.25343	2.2319	2.21856	7.28322	7.38585	2.92881	2.98407	4.94456	4.97196	3.82253	4.66223
38.8	6.3746	5.22719	2.18486	2.16976	6.98207	6.3746	2.91186	2.97592	4.95153	4.70425	4.01475	4.99273
38.9	6.80013	5.2481	2.18934	2.18914	6.78475	6.80013	3.01538	2.96523	4.78646	4.5953	4.07146	4.99798
39	6.91238	5.48367	2.1993	2.21299	6.63342	6.91238	2.90288	2.92384	4.55321	4.43924	3.80013	4.86995
39.1	6.21014	5.26551	2.16743	2.17448	6.92221	6.21014	2.90248	2.95861	4.62939	4.18936	3.95016	4.69149
39.2	6.17082	5.16031	2.11666	2.32929	6.90449	6.17082	3.05255	2.80462	4.90205	4.05571	4.14825	4.95861
39.3	6.10439	5.40956	2.14811	2.1902	6.96324	6.10439	3.0091	2.9267	4.87535	4.2856	4.07346	5.11895
39.4	6.31396	5.18701	2.12627	2.16526	6.97098	6.31396	3.18409	2.94252	4.85953	4.60128	3.98529	4.85255
39.5	6.85175	5.15672	2.17856	2.2042	6.9332	6.85175	2.92091	2.74279	4.6872	4.67607	3.77283	4.87146
39.6	6.26616	5.28291	2.21314	2.10874	6.85556	6.26616	3.13444	2.78126	4.86235	4.44573	4.0186	4.77343
39.7	6.64951	5.21521	2.15014	2.162	6.87099	6.64951	3.14527	2.84698	4.8365	4.45699	3.93307	4.91204
39.8	7.23845	5.26053	2.2107	2.13212	7.11296	7.23845	3.11328	2.83134	4.60047	4.47351	3.87328	4.6269
39.9	6.5351	5.17573	2.1693	2.21212	7.00796	6.5351	2.87221	2.92771	4.61999	4.45248	3.85154	4.75157
40	6.42462	5.31965	2.13828	2.25358	7.269	6.42462	3.02206	2.78844	4.75051	4.0298	3.90621	4.67879
40.1	6.40221	5.27126	2.13693	2.19825	6.78956	6.40221	2.98138	3.0295	4.51424	4.30589	3.96066	4.88994
40.2	5.91955	5.46073	2.17625	2.13782	6.52795	5.91955	2.86044	2.9709	4.35161	4.01731	3.90925	5.02794
40.3	6.16218	5.26213	2.18535	2.23278	6.40896	6.16218	2.98317	2.93528	4.57531	4.23825	3.82202	4.77494
40.4	6.10222	5.31464	2.13502	2.19542	6.32069	6.10222	3.02812	3.05334	4.30216	4.08765	3.71257	4.77175
40.5	6.27058	5.16196	2.25182	2.16359	6.40841	6.27058	2.7599	2.98295	4.43665	4.22142	3.9467	4.99416
40.6	5.93816	5.08009	2.16581	2.23276	6.20354	5.93816	3.0394	3.1295	4.25017	3.89002	4.21761	5.13419
40.7	5.98682	5.25196	2.13712	2.19413	6.62657	5.98682	3.08499	2.98161	4.36935	3.73556	3.88152	4.92016
40.8	6.42648	5.23123	2.17209	2.2732	6.29685	6.42648	2.7936	3.09603	4.14691	4.29702	3.57353	4.82235
40.9	6.37882	5.23349	2.16195	2.21238	5.91817	6.37882	3.05021	2.78484	3.96127	4.0408	3.96792	4.98717
41	6.70915	5.39251	2.22407	2.17544	6.42631	6.70915	2.78631	2.73214	4.12976	4.57242	3.92436	4.87447
41.1	6.18303	5.20118	2.11428	2.1879	6.25068	6.18303	2.93038	3.07528	4.11327	4.35234	3.8341	4.92633
41.2	6.38359	5.32775	2.19283	2.16718	6.29498	6.38359	2.99382	2.89823	4.10614	4.17855	3.83397	5.06503
41.3	6.48605	5.59401	2.19446	2.3057	6.43309	6.48605	3.00118	2.96732	4.18604	4.39281	3.79885	4.97536
41.4	6.33169	5.20822	2.209	2.20182	5.88241	6.33169	2.94436	2.96274	3.75535	4.44927	4.04095	4.58368
41.5	6.1456	5.53561	2.26571	2.17351	6.63638	6.1456	2.87699	3.06276	4.09053	4.1275	3.93237	4.84002
41.6	7.04831	5.18403	2.20158	2.15721	6.69749	7.04831	3.07969	3.1624	4.58428	5.0744	3.57142	5.1641
41.7	6.85452	5.23513	2.19433	2.16504	6.56301	6.85452	3.10656	2.82047	4.52477	4.50984	3.93823	4.84692
41.8	6.54	5.19222	2.20824	2.20694	6.76813	6.54	3.00427	3.06573	4.72557	4.47677	3.67228	4.98324
41.9	6.14944	5.29935	2.17944	2.1631	6.63913	6.14944	3.09666	3.03559	4.73741	4.13831	4.13104	4.88096
42	5.56473	5.44273	2.20307	2.19617	6.62026	5.56473	3.0078	3.01837	4.18836	3.93996	4.12363	5.19308
42.1	6.31982	5.27876	2.22946	2.24784	6.6095	6.31982	3.04114	2.95607	4.38306	3.99395	4.10767	4.86135
42.2	6.85984	5.12795	2.16119	2.20304	6.66867	6.85984	2.82121	2.91714	4.45534	4.53507	3.96539	4.89912
42.3	6.60861	5.34141	2.22478	2.22937	6.61266	6.60861	2.986	3.05558	4.15327	4.5542	3.98242	4.73526
42.4	6.04718	5.26628	2.1935	2.1113	6.66817	6.04718	3.21393	2.97954	4.41183	4.00046	4.14398	4.88558
42.5	5.79959	5.36545	2.33876	2.19794	5.74944	5.79959	3.04182	3.0547	3.9157	3.95176	4.07591	4.93511
42.6	6.19659	5.29936	2.19993	2.13626	6.00892	6.19659	2.89453	2.89207	4.13229	4.19486	4.18539	4.89109
42.7	5.99864	5.20554	2.17693	2.17289	6.07439	5.99864	2.98149	3.03379	4.24402	4.34633	4.11492	5.11257
42.8	5.73543	5.57282	2.26995	2.23238	6.63249	5.73543	2.95686	2.99929	4.42138	4.16434	3.93632	4.69898
42.9	5.90234	5.24764	2.1774	2.27041	6.17614	5.90234	2.92694	3.15991	4.23947	3.89826	3.78632	4.89614
43	6.46753	5.49593	2.15029	2.19581	6.43133	6.46753	2.91169	2.92591	4.30133	4.10808	4.06577	4.99812
43.1	7.24303	5.38148	2.19383	2.32478	6.02732	7.24303	2.88442	3.04857	4.36355	4.67464	4.06729	4.81557
43.2	7.07104	5.22922	2.2026	2.10899	6.31033	7.07104	2.96651	3.218	4.02205	4.70861	3.80875	4.66887
43.3	6.42615	5.09715	2.20019	2.2359	5.81829	6.42615	3.12426	2.84056	3.81673	4.40618	4.11043	4.91605
43.4	7.19069	5.24875	2.1484	2.18628	5.95558	7.19069	3.12562	2.82613	4.06283	4.81966	4.00972	4.50531
43.5	6.3529	5.30702	2.20407	2.16932	6.01344	6.3529	3.03029	2.98283	4.23553	4.37249	3.92923	4.93991
43.6	5.89227	5.06682	2.18111	2.20747	5.92528	5.89227	2.93163	2.87109	4.12458	4.21523	3.95112	4.61069
43.7	6.55912	5.17445	2.19283	2.23081	5.90637	6.55912	2.89514	2.99359	3.6976	4.7828	3.77103	4.84704
43.8	6.38007	5.57005	2.16588	2.18559	5.96098	6.38007	2.93621	3.07149	3.99112	4.37969	3.86693	4.85868
43.9	6.6288	5.21443	2.23814	2.16719	6.13396	6.6288	2.94981	3.06951	4.23844	4.52754	3.91263	4.88629
44	6.41921	5.19987	2.13939	2.19528	6.61729	6.41921	3.06178	2.90482	4.55445	4.63012	3.75845	4.67988
44.1	6.56931	5.1044	2.20944	2.23447	6.0206	6.56931	2.88953	3.08928	4.16267	4.25098	3.58704	4.91032
44.2	6.44752	5.28652	2.20961	2.1545	6.63707	6.44752	3.13944	2.9306	4.60335	4.40923	3.72534	4.86383
44.3	6.40531	5.44603	2.24141	2.24999	6.03486	6.40531	3.06705	3.08968	4.00364	4.16252	3.9659	4.63936
44.4	6.61178	5.22351	2.15637	2.18698	6.22682	6.61178	2.88778	3.13323	4.2526	4.61176	3.70981	4.82393
44.5	6.0404	5.42572	2.15822	2.1017	5.79652	6.0404	3.13273	2.98156	4.23595	4.03922	4.00877	4.82665
44.6	6.14332	4.94398	2.22887	2.12371	6.03485	6.14332	2.95372	3.04332	4.48609	3.9814	3.84386	4.97447
44.7	6.01418	5.17841	2.21236	2.04266	6.20444	6.01418	2.77305	3.11246	4.3904	4.14548	3.66864	4.90077
44.8	5.99783	5.11078	2.24252	2.19801	5.61289	5.99783	2.8535	3.02142	3.72871	4.17392	3.84667	4.98745
44.9	6.37625	5.18254	2.17456	2.18651	5.73834	6.37625	2.98085	3.03964	3.87947	4.3075	3.68279	5.15109
45	5.82747	5.42695	2.20371	2.12048	6.88017	5.82747	2.98289	3.19794	4.30828	3.85095	3.6953	5.05044
45.1	6.31313	5.19717	2.15715	2.14322	6.67709	6.31313	2.9611	3.02668	4.55335	4.33828	3.66337	5.02346
45.2	6.65515	5.48093	2.22614	2.23165	6.79687	6.65515	3.14528	3.08954	4.41876	4.5834	3.76157	5.05661
45.3	6.53979	5.14822	2.18373	2.13296	6.85815	6.53979	3.06876	2.91951	4.54826	4.63783	3.80368	4.92994
45.4	6.59673	5.25851	2.19306	2.14704	6.67852	6.59673	3.07703	2.98652	4.69172	4.35897	3.68285	4.85916
45.5	6.0262	5.19283	2.18771	2.18338	6.36953	6.0262	2.82399	3.17759	4.33202	3.91328	3.74427	5.1809
45.6	6.71453	5.19406	2.21429	2.21367	6.56173	6.71453	2.88067	3.10661	4.7329	4.24153	3.79896	4.85532
45.7	6.50871	5.29229	2.13807	2.16527	6.55162	6.50871	3.02	2.90578	4.52321	4.36348	3.97142	4.93959
45.8	6.50319	5.33117	2.20219	2.20338	6.19939	6.50319	2.93166	2.91712	3.89338	4.25699	3.74111	4.48016
45.9	6.2972	5.21216	2.21917	2.22097	5.73796	6.2972	3.10696	3.06063	3.8865	4.43792	3.73728	4.80645
46	5.74249	5.21931	2.15855	2.12995	6.2121	5.74249	3.02063	2.91533	4.21305	3.98419	3.91173	4.84391
46.1	5.7448	5.09169	2.16363	2.23788	6.06717	5.7448	2.89255	3.12161	4.50535	3.94504	3.78629	5.07707
46.2	5.60568	5.20104	2.15171	2.19114	6.21528	5.60568	2.87956	3.19806	4.01473	3.76159	3.86685	5.04056
46.3	5.20836	5.11428	2.22935	2.21787	5.97055	5.20836	3.09829	3.10948	4.2245	3.96774	3.96109	5.18811
46.4	5.6922	5.29697	2.19664	2.15388	6.49367	5.6922	2.93436	3.00017	4.60498	3.91558	4.04978	4.92396
46.5	5.90648	5.22197	2.19396	2.30683	7.18641	5.90648	2.94832	2.78357	5.3545	3.86552	3.81133	4.96238
46.6	6.21201	5.12461	2.21708	2.23482	6.72572	6.21201	3.03496	2.73895	4.57146	4.30818	3.79582	4.7249
46.7	6.37609	5.40438	2.27069	2.24134	6.53787	6.37609	2.94282	2.78492	4.26882	3.90171	3.93648	4.8323
46.8	5.61214	5.42605	2.16726	2.20385	6.57205	5.61214	3.10346	3.07161	4.61967	3.80637	4.02298	4.91993
46.9	6.1249	5.33906	2.15907	2.16601	6.81123	6.1249	3.13596	2.81482	4.53514	4.13497	4.10037	4.90958
47	6.26905	5.31599	2.19895	2.16471	6.89065	6.26905	3.05754	3.10109	4.81948	4.15566	4.01808	4.88023
47.1	6.0221	5.42702	2.25629	2.09235	6.60486	6.0221	3.17299	3.01513	4.31202	3.865	3.96456	5.00558
47.2	6.2705	5.08878	2.18851	2.24413	6.01572	6.2705	2.97444	2.99139	3.85511	3.89107	3.83145	4.79901
47.3	5.87898	5.40508	2.16196	2.18988	6.58835	5.87898	3.09314	3.02432	4.34887	4.15044	3.63023	5.04415
47.4	5.4291	5.20111	2.12886	2.10616	6.40938	5.4291	3.04974	2.92245	4.31628	3.86016	3.7934	5.05244
47.5	5.67993	5.31487	2.17957	2.26425	6.69939	5.67993	3.13424	3.01529	4.43616	3.89211	3.90309	4.89511
47.6	5.87228	5.26469	2.26872	2.24937	6.4931	5.87228	3.17616	3.01219	4.41561	3.83541	3.95369	5.08615
47.7	6.52457	5.44379	2.17422	2.144	7.2061	6.52457	3.12437	2.99006	5.0925	4.08028	3.99812	4.76373
47.8	5.75856	5.27569	2.25482	2.1869	6.6662	5.75856	2.93782	2.90173	4.30389	3.7786	3.61485	4.86742
47.9	5.68532	5.28493	2.2333	2.17247	6.01187	5.68532	2.9134	2.96026	4.46534	3.7761	3.91216	5.00068
48	6.02869	5.27496	2.15169	2.1827	6.60724	6.02869	3.21833	3.06349	4.45392	3.97341	3.82271	5.08545
48.1	6.28268	5.06103	2.20193	2.26572	6.11831	6.28268	3.00117	2.8659	4.33643	4.18544	3.63596	4.82065
48.2	6.13438	5.14562	2.15209	2.24032	6.90838	6.13438	3.04201	2.99964	4.54466	3.8591	3.81687	4.86239
48.3	5.73925	5.1865	2.23221	2.23484	6.17626	5.73925	3.02358	3.00773	3.98441	3.90697	3.92697	4.89571
48.4	5.87448	5.48444	2.24868	2.22842	6.45298	5.87448	3.2176	2.95451	4.32616	3.58749	3.74714	4.827
48.5	5.37697	5.57566	2.19135	2.13937	6.95044	5.37697	3.03377	2.99983	4.59331	3.62147	3.81358	5.09915
48.6	6.00615	5.10028	2.2327	2.17793	6.55586	6.00615	3.00621	2.94674	4.37606	3.92257	3.82176	5.18142
48.7	5.66643	5.24646	2.21025	2.20409	6.30098	5.66643	3.05954	2.92122	4.27513	3.86483	3.92023	4.98686
48.8	5.39497	5.18187	2.20843	2.19614	5.99329	5.39497	3.15937	3.0946	4.40266	3.66826	3.90614	4.83415
48.9	5.93019	5.15224	2.25265	2.19001	7.03857	5.93019	3.09192	3.10087	5.16555	3.77136	4.141	5.09614
49	6.19656	5.3387	2.22148	2.22566	7.10579	6.19656	2.92311	2.99429	5.0417	4.13541	3.95156	5.02322
49.1	5.75291	5.16263	2.20298	2.22791	6.88625	5.75291	3.03192	3.05689	4.99976	3.66764	3.89128	4.84001
49.2	5.5641	5.24878	2.21501	2.16159	6.80032	5.5641	2.93896	2.83515	4.47331	4.02201	3.54001	4.85408
49.3	6.57561	5.26548	2.15753	2.20729	6.96167	6.57561	2.91228	2.85048	4.94332	4.1311	3.84273	4.84491
49.4	5.96772	5.30711	2.17056	2.16906	7.20448	5.96772	3.06921	2.91145	5.0383	3.68565	4.04227	4.92713
49.5	6.10872	5.20535	2.19256	2.22017	7.57801	6.10872	3.00926	3.14554	5.33475	4.15147	3.73063	5.22853
49.6	6.28126	5.22379	2.20172	2.2217	7.05656	6.28126	2.89492	3.02276	5.09265	4.42122	3.82	5.16303
49.7	6.10393	5.35537	2.18185	2.21427	6.97895	6.10393	3.02722	3.12702	4.55809	4.08544	3.80029	5.20353
49.8	6.65343	5.31632	2.27761	2.26982	6.52696	6.65343	3.11801	3.09474	4.70925	4.28464	3.84105	5.17865
49.9	5.79843	5.24897	2.21182	2.13627	7.37321	5.79843	3.06628	3.12016	5.0889	3.92283	3.67487	5.21084
50	5.35023	5.20963	2.24747	2.20183	6.563	5.35023	3.12484	3.01098	4.41129	3.54012	3.71557	4.88334
50.1	6.23759	5.25643	2.09791	2.15956	7.44531	6.23759	2.93757	3.01026	5.13215	4.2378	3.84121	5.1334
50.2	6.50919	5.20261	2.18635	2.20491	7.23825	6.50919	3.04258	2.90555	5.299	4.29868	3.90638	4.79455
50.3	6.3407	4.99586	2.22054	2.19117	6.85608	6.3407	2.77499	3.04995	4.98506	4.11052	3.81031	4.97755
50.4	6.09478	5.30816	2.21491	2.17269	7.11218	6.09478	3.17233	3.00747	4.8945	4.13258	3.71376	5.2157
50.5	6.32518	5.08799	2.17706	2.1395	6.64374	6.32518	2.90859	2.91538	4.5754	4.01168	3.69934	4.83207
50.6	6.18921	5.39224	2.22456	2.14297	7.14818	6.18921	2.92781	2.98828	4.74254	4.33032	3.87134	5.21767
50.7	6.20158	5.24208	2.1351	2.22476	7.08549	6.20158	3.04942	3.01459	5.12335	4.08875	3.85723	5.09129
50.8	6.7314	5.12136	2.19537	2.17743	6.38279	6.7314	2.81109	3.05336	4.43687	4.49112	3.89869	5.22682
50.9	5.46519	5.38939	2.12351	2.18677	7.5557	5.46519	2.89269	2.98783	5.085	3.87385	3.91105	5.0039
51	5.77172	5.61424	2.18961	2.23303	7.10891	5.77172	2.92294	2.96479	4.49779	3.74962	4.05738	5.04203
51.1	5.39445	5.05568	2.21958	2.21113	6.50017	5.39445	2.88911	3.03944	4.57757	3.53643	3.88149	4.95488
51.2	4.96057	5.39749	2.17608	2.13204	6.8497	4.96057	3.05213	2.97507	4.71882	3.47108	4.07129	4.9953
51.3	6.10002	5.7259	2.10907	2.2254	7.42445	6.10002	3.0251	2.96021	5.0837	3.91323	4.02186	5.02954
51.4	5.82109	5.2526	2.19737	2.13076	7.02285	5.82109	2.93353	3.22839	4.82754	3.99996	3.71923	5.02137
51.5	6.34915	5.29434	2.2376	2.15465	7.12528	6.34915	2.96923	3.00514	5.1216	4.00271	3.93088	4.86996
51.6	6.44414	5.36035	2.22026	2.19262	7.33221	6.44414	2.88252	3.12771	5.3162	4.23501	3.92491	5.00776
51.7	5.94553	5.34123	2.12882	2.22301	6.83584	5.94553	2.80104	3.09829	4.52013	3.9387	3.87949	5.16411
51.8	5.45617	5.1695	2.22995	2.16687	7.0024	5.45617	3.07728	3.01282	4.66641	3.58046	3.83114	4.91345
51.9	5.58638	5.19319	2.23235	2.18354	6.70363	5.58638	3.03406	3.11029	4.57285	3.3542	3.70811	5.0801
52	5.41976	5.18996	2.25947	2.15956	7.24145	5.41976	3.06368	3.19667	5.0008	3.63381	3.87499	5.16146
52.1	6.25325	5.27316	2.22517	2.23482	7.29653	6.25325	2.81411	2.87529	4.85496	3.94325	3.75058	4.85853
52.2	6.21901	5.09912	2.1667	2.17777	7.22466	6.21901	2.89162	3.1009	5.11335	4.43048	4.10906	5.20219
52.3	5.96799	5.34733	2.21678	2.16406	7.16667	5.96799	3.03062	3.03704	5.03445	3.95779	3.86273	5.0614
52.4	5.5529	5.20977	2.18483	2.1755	6.92537	5.5529	3.09605	3.12094	4.56979	3.56754	3.94108	5.02257
52.5	5.69862	5.5195	2.14518	2.20533	7.3702	5.69862	3.10541	3.16295	5.04905	4.00507	3.82936	5.11202
52.6	5.16503	5.24097	2.39788	2.13876	6.99252	5.16503	2.9663	3.01139	4.74648	3.71606	3.80346	4.77986
52.7	5.68686	5.0704	2.2125	2.16256	7.18759	5.68686	2.98468	3.20607	5.2003	3.8662	3.9626	5.15068
52.8	5.71364	5.38589	2.25902	2.20497	7.31155	5.71364	3.1687	3.02101	5.09815	3.4648	4.16927	4.88882
52.9	6.07148	5.21509	2.17528	2.26687	7.35131	6.07148	2.97168	3.15301	5.1544	4.05741	3.93685	5.18278
53	5.76079	5.07898	2.21699	2.14465	6.97966	5.76079	3.08519	2.90414	5.03665	3.39977	3.98128	5.00434
53.1	5.83296	5.33683	2.12121	2.18901	6.9122	5.83296	3.08575	3.13502	5.071	3.58833	4.06519	5.17326
53.2	5.85942	5.28684	2.2156	2.19633	7.16111	5.85942	3.02136	2.99213	5.21575	3.90626	3.93745	5.06935
53.3	6.04945	5.00163	2.30104	2.21168	7.41541	6.04945	3.22335	2.89768	5.50415	3.84824	4.05382	4.75021
53.4	6.42831	5.18996	2.15218	2.16242	7.2115	6.42831	3.04447	3.0745	5.50165	4.11402	4.05337	4.81812
53.5	6.44076	5.25974	2.07739	2.18743	7.14919	6.44076	3.11273	2.88783	5.2134	4.21734	4.08477	4.86367
53.6	6.20344	5.35733	2.14352	2.11329	7.10243	6.20344	3.09237	3.11699	5.3014	3.81126	4.1325	5.19559
53.7	6.04845	5.15114	2.19627	2.1742	6.82	6.04845	3.0788	2.94038	5.0575	3.94462	4.01179	5.44565
53.8	5.85018	4.94765	2.17141	2.21291	7.17091	5.85018	3.13178	2.98909	5.5419	3.81332	3.99957	5.08283
53.9	5.67035	5.56368	2.24806	2.08707	7.47558	5.67035	3.09409	3.04008	5.1697	3.99107	3.90467	5.32765
54	6.0209	5.2913	2.11773	2.22944	7.02552	6.0209	2.94948	2.94931	5.0416	4.24582	3.79627	5.42125
54.1	6.21079	4.99512	2.18688	2.20528	6.89802	6.21079	2.85808	3.03458	5.01135	4.19205	3.97653	5.29145
54.2	6.31884	5.28244	2.10848	2.19745	6.74207	6.31884	2.91077	3.14299	4.95368	4.5205	3.75886	5.5331
54.3	5.60968	5.33987	2.20712	2.1807	7.25436	5.60968	3.14208	2.98095	5.27545	3.84306	4.07279	4.9927
54.4	6.03193	5.45512	2.13484	2.07631	6.93752	6.03193	3.02178	2.97233	4.70172	3.80831	3.97187	5.2233
54.5	6.46856	5.14706	2.18411	2.17013	6.73681	6.46856	2.94024	2.96731	4.70723	3.94458	3.81729	5.13578
54.6	6.63741	5.3821	2.14784	2.17048	6.73372	6.63741	3.07997	2.97695	4.67755	4.34122	3.95775	5.7175
54.7	6.48264	5.43688	2.25706	2.12425	6.34647	6.48264	2.84025	3.08664	4.02116	4.0087	3.69701	5.84365
54.8	6.0107	5.39402	2.12079	2.09632	7.11759	6.0107	3.17012	3.20241	4.91623	3.97493	3.96142	6.0589
54.9	6.10919	5.42535	2.18116	2.19381	7.16548	6.10919	2.94917	2.98923	4.71429	3.68857	3.76933	5.86635
55	5.20281	5.04465	2.32545	2.29345	6.74357	5.20281	3.20289	3.08675	4.74189	3.63833	4.059	5.4
55.1	5.57662	5.21807	2.18549	2.16988	6.61292	5.57662	2.98879	3.02806	4.9484	3.97933	4.03941	5.22157
55.2	5.69473	5.38467	2.16927	2.12386	7.0073	5.69473	3.00324	3.08011	4.74566	3.95499	4.08866	5.2254
55.3	5.59751	5.23679	2.15288	2.17955	7.07088	5.59751	3.06303	3.14993	4.8441	3.7049	4.11588	5.4249
55.4	5.89907	5.33183	2.14444	2.18041	6.63316	5.89907	2.85977	3.12376	4.59991	4.01288	4.01214	5.2147
55.5	5.38832	5.47947	2.17638	2.16891	6.83278	5.38832	2.89257	3.25548	4.45209	3.59014	4.21531	5.3965
55.6	5.65824	5.27088	2.24597	2.06157	7.54099	5.65824	2.88806	2.99452	5.3964	3.84199	3.9658	5.40975
55.7	7.05276	5.23735	2.197	2.03718	6.53644	7.05276	3.04473	3.14222	4.59027	4.4484	4.05157	5.23825
55.8	6.75416	5.2929	2.04019	2.07477	6.80199	6.75416	3.17449	2.96879	4.82786	4.56285	4.25197	4.99252
55.9	6.07437	5.23271	2.23085	2.11697	6.97269	6.07437	2.97792	3.09861	4.5308	3.78125	4.2198	5.6542
56	6.30657	5.4387	2.16506	2.16796	7.21669	6.30657	2.90266	3.02611	4.99148	4.31797	4.02489	4.76499
56.1	6.27961	5.30591	2.20845	2.17097	6.84553	6.27961	2.95914	3.18133	4.92579	3.87379	4.23296	5.05345
56.2	5.4531	5.60159	2.11113	2.03653	6.83278	5.4531	3.03818	3.10154	4.76236	3.8079	4.08936	4.89656
56.3	5.77159	5.34924	2.28815	2.13897	6.76842	5.77159	2.99913	2.80335	4.51624	3.72153	4.11273	5.3862
56.4	5.71551	5.38341	2.19201	2.11309	6.80989	5.71551	3.10617	3.11459	4.48883	3.79449	4.1916	5.0068
56.5	5.39468	5.09614	2.21986	2.19866	6.688	5.39468	2.91798	3.169	4.3091	3.4871	4.03738	5.2151
56.6	5.47834	5.31473	2.19928	2.06314	6.54954	5.47834	2.83544	2.90184	4.3773	3.6424	3.96291	5.13575
56.7	5.61185	5.36773	2.13	2.16551	6.92835	5.61185	3.03413	3.16726	4.83134	3.65189	4.06803	5.20095
56.8	5.13075	5.33444	2.2028	2.16479	7.05771	5.13075	3.08344	3.03481	4.84535	3.63975	3.87315	4.9336
56.9	5.83294	5.08106	2.20534	2.13743	6.64809	5.83294	2.77257	2.87734	4.587	3.65168	4.04323	4.82404
57	6.06304	5.41631	2.16248	2.20226	7.0752	6.06304	2.89692	3.14673	4.6025	3.87679	4.05722	4.82066
57.1	5.64805	5.10147	2.21114	2.10187	7.11714	5.64805	3.10783	3.04847	5.02375	3.88641	4.17375	4.52165
57.2	5.55832	5.26731	2.17386	2.15462	7.10713	5.55832	2.87757	3.08745	5.077	4.2302	3.97996	4.85771
57.3	5.82519	5.17462	2.15786	2.19144	6.82381	5.82519	2.95341	2.98714	4.77774	4.18274	3.76837	4.3935
57.4	5.99824	5.2351	2.21793	2.14986	6.68501	5.99824	2.80526	3.01389	4.57082	3.90884	3.97533	4.72608
57.5	5.82135	5.56701	2.19487	2.21409	7.12803	5.82135	3.18271	3.19271	4.69802	4.02721	4.31316	4.75478
57.6	5.94045	5.55695	2.1941	2.20469	7.24076	5.94045	2.92253	3.1236	4.79127	4.07651	4.12927	4.68832
57.7	6.14722	4.95083	2.20445	2.21302	6.82801	6.14722	3.01654	3.06387	4.94902	4.03103	4.61754	4.77349
57.8	6.27446	5.19691	2.24919	2.24424	6.59302	6.27446	3.17639	2.94752	4.71947	4.14271	4.87445	4.89762
57.9	6.11229	5.28055	2.08264	2.10591	6.86867	6.11229	2.91262	2.99523	4.69505	4.29748	4.47111	5.43395
58	5.91676	5.32158	2.20094	2.17875	7.02621	5.91676	3.03909	2.98574	4.73482	4.20766	3.9594	4.19857
58.1	6.22968	5.23227	2.2187	2.23059	6.655	6.22968	2.93217	2.91208	4.45378	4.32278	4.03818	5.2326
58.2	5.74498	5.17357	2.13331	2.1928	7.11812	5.74498	2.68629	2.94572	4.99159	4.20663	3.80811	5.22555
58.3	5.56388	5.12746	2.16861	2.20788	7.06664	5.56388	2.8322	3.09703	4.97495	3.9735	4.01914	4.67812
58.4	5.53057	5.53876	2.11345	2.14623	7.17084	5.53057	3.05166	2.97126	4.96981	3.66154	4.21386	4.99362
58.5	5.65731	5.25969	2.18889	2.15829	6.6935	5.65731	3.09095	2.98318	4.68953	3.86096	4.31114	4.97648
58.6	4.95636	5.14292	2.22663	2.21791	6.61066	4.95636	2.94915	3.07612	4.70956	3.71118	4.13797	5.2737
58.7	5.43479	5.32451	2.17415	2.19866	7.35842	5.43479	2.94696	3.0784	5.0442	4.08754	3.95598	5.10615
58.8	6.22362	5.40768	2.16262	2.19523	7.0297	6.22362	3.11063	3.00718	5.0666	4.3677	4.39864	4.65313
58.9	5.86279	5.12838	2.16672	2.13985	7.27973	5.86279	3.0481	3.09139	5.08015	4.10783	4.23018	5.23975
59	5.84195	5.36376	2.19792	2.19618	6.6137	5.84195	2.9974	3.13121	4.56314	3.95498	4.32247	5.1786
59.1	6.18782	5.25812	2.22959	2.24315	6.9992	6.18782	2.86503	3.08032	4.72128	4.32327	3.99589	4.93189
59.2	5.88429	5.13431	2.21839	2.17334	6.76014	5.88429	3.08649	2.92735	4.93836	3.82882	4.37203	4.97863
59.3	6.1364	5.24548	2.15984	2.23914	6.80854	6.1364	2.98541	2.96306	5.0198	4.06539	4.16519	5.18605
59.4	6.07489	5.21876	2.23434	2.26213	7.00526	6.07489	2.86434	3.13714	5.03965	3.94726	4.0356	5.22645
59.5	5.7334	5.37516	2.16398	2.20389	7.03171	5.7334	3.17285	2.90258	4.72703	3.8121	4.33626	5.12955
59.6	5.54488	5.33566	2.17017	2.17394	7.5621	5.54488	2.97033	2.98601	5.131	3.91872	3.97256	5.2032
59.7	6.14862	5.26118	2.13379	2.21684	7.42042	6.14862	2.93844	3.00025	5.2972	3.9687	3.95935	5.2052
59.8	6.06362	5.07322	2.16768	2.18023	6.62772	6.06362	3.23545	2.75931	4.70294	4.06021	4.34875	5.55905
59.9	5.9959	5.29105	2.15869	2.19727	6.63295	5.9959	2.94977	2.96495	4.72835	3.88484	4.0587	5.51535
60	5.55393	5.21362	2.17311	2.18445	7.01075	5.55393	3.09441	3.11336	4.78164	4.11073	3.99322	4.77649
60.1	6.09788	5.0926	2.22934	2.2174	7.07337	6.09788	2.99499	3.02569	4.81654	4.22264	3.96098	5.04535
60.2	5.43804	5.19104	2.19601	2.16037	7.26885	5.43804	3.15241	3.09576	5.1475	3.59463	4.46471	5.4051
60.3	5.71307	5.39881	2.24429	2.23002	6.70671	5.71307	3.00541	2.93366	4.35837	3.96987	3.94784	4.99315
60.4	5.65197	5.26997	2.13792	2.18654	6.59862	5.65197	2.92626	2.88967	4.507	3.95511	4.20464	5.3936
60.5	5.38347	5.29581	2.18707	2.20165	6.83977	5.38347	2.93228	3.09336	4.90365	3.8933	4.18593	5.3388
60.6	5.87608	5.40318	2.21484	2.18993	7.49916	5.87608	2.88768	2.98431	5.1435	3.98895	4.04157	5.1214
60.7	6.18555	5.2876	2.19002	2.21959	7.16777	6.18555	2.88071	3.0494	4.90012	4.21584	4.03105	5.2647
60.8	6.12746	5.25905	2.20517	2.16694	6.75063	6.12746	2.81338	2.95743	4.57651	4.28407	4.15127	5.10705
60.9	5.30522	4.98562	2.18771	2.27322	7.20493	5.30522	2.91385	2.98702	5.59455	3.59212	4.10738	5.09235
61	5.77111	5.2587	2.25828	2.18255	7.22572	5.77111	3.19165	3.01282	5.2858	3.97887	4.0702	5.17165
61.1	5.7421	5.03707	2.16463	2.17021	7.30765	5.7421	3.00847	3.14093	5.23725	3.862	4.06247	5.80825
61.2	5.81914	5.42748	2.24612	2.1696	7.10652	5.81914	3.0619	2.85958	5.0965	4.0526	4.21773	5.05685
61.3	6.23612	5.19988	2.12846	2.20641	7.38799	6.23612	3.12658	2.88381	5.3349	4.66172	4.17824	5.22925
61.4	6.208	5.15669	2.17188	2.17693	7.19164	6.208	3.00583	3.08161	5.171	4.35025	3.98282	5.0628
61.5	6.29255	5.21662	2.23049	2.28002	7.74278	6.29255	3.05369	2.89764	5.50005	4.10225	4.24397	5.06185
61.6	5.21376	5.44182	2.2087	2.21399	7.21228	5.21376	3.06034	3.13885	5.11455	3.50353	4.13825	5.2132
61.7	5.75654	5.00045	2.13511	2.15558	7.06872	5.75654	3.0889	2.96278	5.3364	3.88163	4.31502	5.19805
61.8	4.98393	5.299	2.22641	2.27643	7.59575	4.98393	2.76781	2.99074	5.32775	3.86191	4.17289	5.5837
61.9	5.52203	5.25006	2.21601	2.18649	6.76484	5.52203	3.01391	2.97078	4.5053	3.70411	3.91164	5.0463
62	5.84725	5.35855	2.21467	2.21326	7.10515	5.84725	2.85244	3.05755	4.86876	3.96745	4.17771	4.83561
62.1	6.38514	4.94129	2.23184	2.13566	6.1304	6.38514	2.95764	2.84323	4.26302	4.17284	4.13077	4.69874
62.2	5.89332	5.47498	2.2287	2.20012	7.0335	5.89332	2.91296	2.86694	4.55694	3.73434	3.97813	5.31015
62.3	7.3087	5.13978	2.17232	2.24084	6.91807	7.3087	3.19992	3.01314	5.3162	4.38253	3.72072	5.34605
62.4	6.36749	5.28284	2.16276	2.17382	7.29328	6.36749	3.13535	2.9893	4.86246	4.25441	3.71109	5.94895
62.5	5.65413	5.17314	2.20416	2.24257	6.57632	5.65413	3.05423	3.10657	4.67457	4.0301	3.83434	5.939
62.6	5.62978	5.32539	2.17222	2.24654	6.62122	5.62978	2.83985	3.05407	4.96078	3.86518	4.0753	5.5631
62.7	5.85263	5.31253	2.15613	2.22356	6.70117	5.85263	3.04956	2.95483	4.64156	3.72384	3.8749	5.5335
62.8	5.87512	5.43994	2.16265	2.23297	7.26952	5.87512	2.78944	3.02292	4.69035	3.69902	3.8782	5.4379
62.9	5.90285	5.56604	2.23293	2.24937	7.4169	5.90285	2.89408	3.07748	4.93515	3.76716	3.70032	5.23225
63	5.62465	4.94825	2.22385	2.22475	6.12535	5.62465	2.87751	3.10153	4.71899	3.79564	4.04384	5.12995
63.1	4.85096	5.60934	2.2013	2.18798	7.18679	4.85096	2.94477	2.91571	4.83763	3.8319	4.28995	4.94603
63.2	5.36623	5.56373	2.15751	2.17828	6.87303	5.36623	2.81061	3.04498	4.47215	3.76265	3.85497	5.44615
63.3	5.14465	5.19534	2.10937	2.20485	6.43234	5.14465	3.01608	3.13578	4.67458	3.83487	3.92043	5.548
63.4	5.13439	5.56477	2.11833	2.21471	7.36841	5.13439	3.03459	3.16671	5.1845	3.77262	4.2259	5.83535
63.5	5.45347	5.18541	2.19183	2.21745	6.60844	5.45347	2.98355	3.105	4.755	3.89291	3.97722	5.60395
63.6	5.00829	5.15655	2.19109	2.25253	6.88413	5.00829	2.95312	2.98251	4.79448	3.60774	3.88648	5.2936
63.7	5.53362	5.48917	2.13862	2.18646	6.83718	5.53362	2.87533	2.93339	4.52742	3.82408	3.98481	5.09845
63.8	6.04169	5.30921	2.14527	2.06894	6.89226	6.04169	2.89588	2.99159	4.44815	3.77816	3.95659	5.9364
63.9	5.37411	5.44893	2.23129	2.2653	6.83798	5.37411	2.91536	3.07279	4.19479	3.66897	3.80736	4.93044
64	5.15892	5.40637	2.23437	2.21285	6.97187	5.15892	2.79832	3.16436	4.18194	3.5814	3.96972	4.66712
64.1	5.05452	5.64473	2.13825	2.19889	7.12716	5.05452	2.67715	3.0405	4.58506	3.51926	3.8572	4.62808
64.2	5.19392	5.32781	2.16658	2.24608	6.04957	5.19392	2.87858	3.07692	3.79917	3.45941	3.72029	4.86551
64.3	5.02161	5.3997	2.1685	2.11555	6.24728	5.02161	2.82578	3.05958	4.26542	3.55277	4.07348	5.282
64.4	4.87705	5.37734	2.13489	2.11535	6.55767	4.87705	2.76803	3.19468	4.20572	3.60812	3.75687	5.32575
64.5	5.19361	5.15487	2.22546	2.23543	6.51619	5.19361	2.92024	2.7521	4.24379	3.63714	4.0173	5.15365
64.6	5.33087	5.42068	2.22519	2.24458	6.31461	5.33087	2.98142	3.0452	4.37582	3.94611	4.28506	5.41015
64.7	5.79439	5.58309	2.18247	2.17118	6.02442	5.79439	2.8842	3.04839	4.27774	3.7777	4.06735	5.00525
64.8	5.31175	5.17635	2.17198	2.14039	6.26485	5.31175	2.8697	3.0379	4.26316	3.81911	3.93625	4.89023
64.9	5.45671	5.45836	2.18135	2.2681	6.58179	5.45671	2.86162	2.90983	4.36041	4.03639	3.58221	5.19875
65	5.38783	5.5236	2.26035	2.21404	6.56644	5.38783	3.14463	2.92734	4.1395	3.72966	3.62274	5.1048
65.1	5.93244	5.60174	2.12423	2.18602	6.81253	5.93244	2.83388	2.77119	4.39193	3.85155	3.97365	5.56015
65.2	5.63155	5.3398	2.19336	2.26713	6.01908	5.63155	2.94739	2.95562	3.96904	3.79102	4.15574	5.0993
65.3	5.72874	5.39971	2.15713	2.25955	6.00265	5.72874	3.01837	3.08033	3.95842	4.20657	4.12054	5.35915
65.4	5.47572	5.42589	2.18119	2.17077	6.60044	5.47572	2.92007	2.87921	4.28357	4.01237	3.92736	5.3007
65.5	5.57189	5.05738	2.18948	2.15817	5.84542	5.57189	3.06107	2.92891	3.82484	4.16297	4.04217	5.6125
65.6	5.77339	5.40221	2.18568	2.12719	6.78751	5.77339	2.93084	3.13713	4.14171	4.21939	4.12951	5.335
65.7	5.84421	5.38764	2.15139	2.23832	6.47911	5.84421	2.93449	2.82619	4.39921	4.17406	4.02893	5.16245
65.8	5.8997	5.45664	2.17482	2.22173	6.49308	5.8997	3.00032	2.8615	4.09037	4.18325	3.96374	5.50225
65.9	5.41796	5.20051	2.1705	2.14778	6.00823	5.41796	3.12029	2.97059	3.88995	3.85819	4.24591	5.07565
66	5.72403	5.52997	2.20953	2.1217	6.42767	5.72403	3.07164	2.92206	4.15137	3.96896	4.10957	4.968
66.1	5.63165	5.43963	2.16322	2.19908	5.45941	5.63165	3.17159	3.02113	3.7742	3.96616	4.04234	5.45675
66.2	5.95153	5.66122	2.17924	2.2965	6.51876	5.95153	2.84345	2.9253	3.8211	3.82235	3.85858	5.75175
66.3	5.66951	5.45467	2.22042	2.27445	6.5129	5.66951	2.83108	3.03869	4.27392	4.02978	3.94849	5.61885
66.4	5.91852	5.29727	2.19778	2.18888	6.03811	5.91852	2.81464	2.94435	4.01173	4.04878	3.94567	5.33485
66.5	5.36334	5.34804	2.13886	2.17754	6.22454	5.36334	2.89242	3.02581	3.97688	3.7151	3.86703	5.68095
66.6	6.3372	5.46316	2.1791	2.14376	6.34125	6.3372	2.99161	3.0596	4.06928	4.24831	4.04776	5.5323
66.7	6.07862	5.25943	2.17014	2.23861	6.29202	6.07862	3.13416	2.84273	4.89423	4.13991	4.05191	6.1383
66.8	6.0221	5.32146	2.21251	2.17053	6.58303	6.0221	2.87232	3.04902	4.61092	4.3826	3.87114	5.66415
66.9	5.62513	5.12545	2.1627	2.19056	6.56372	5.62513	2.89272	2.89897	4.73805	4.13165	3.94553	4.84818
67	6.70517	5.38627	2.16673	2.14226	6.24213	6.70517	3.00506	2.89032	4.34945	3.92592	4.02013	4.75598
67.1	6.16772	5.70039	2.22118	2.19501	6.37812	6.16772	2.92944	2.88098	4.04848	4.1773	3.97659	4.91399
67.2	5.75938	5.03166	2.13944	2.21197	6.09644	5.75938	2.80017	2.75474	4.36913	3.84697	3.95682	5.1937
67.3	5.56665	5.22206	2.1486	2.20423	6.35119	5.56665	3.11077	2.93899	4.54026	4.08482	4.3827	5.404
67.4	6.15344	5.25643	2.149	2.2343	5.97628	6.15344	2.98117	3.14458	4.28899	4.43102	4.27476	4.81411
67.5	6.37352	5.31703	2.23171	2.15646	6.31402	6.37352	3.02808	2.86119	4.04762	4.4683	4.14473	4.70716
67.6	6.30342	5.08912	2.2066	2.25835	6.58824	6.30342	2.84933	2.99325	4.21108	4.4451	4.08516	4.40964
67.7	5.77156	5.47771	2.17361	2.21876	6.90832	5.77156	2.95345	2.86357	4.40823	3.90517	4.22178	5.91775
67.8	5.64786	5.23744	2.22607	2.20104	6.15101	5.64786	2.93292	3.20013	4.34402	4.14008	4.06041	5.30455
67.9	6.17906	5.37406	2.26533	2.19334	6.61796	6.17906	2.97734	3.02249	4.32067	4.28959	4.08925	4.94714
68	6.29083	5.307	2.16541	2.30008	6.39191	6.29083	2.90292	3.03646	4.37988	4.26541	3.98333	5.0716
68.1	5.71096	5.17314	2.15204	2.17963	5.96949	5.71096	2.85901	3.15645	3.92252	4.51039	3.83658	5.06455
68.2	6.19214	5.2248	2.12832	2.16397	6.04657	6.19214	3.18931	2.81626	3.79196	4.36785	3.71335	5.1335
68.3	6.2238	5.54182	2.16543	2.20011	6.70496	6.2238	2.98404	3.11095	4.18555	4.39325	3.68553	4.96805
68.4	5.87791	5.34866	2.25664	2.14284	6.73836	5.87791	3.01609	2.99546	4.47373	4.18696	3.70374	4.92315
68.5	6.24892	5.35455	2.22214	2.10854	6.53877	6.24892	3.07199	2.90421	4.24602	4.23827	3.81735	5.2173
68.6	6.65817	5.39303	2.1766	2.25416	6.22509	6.65817	3.05658	2.93743	4.09226	4.53335	3.86117	5.01335
68.7	6.54699	5.4977	2.20194	2.09965	6.37649	6.54699	3.13789	3.08553	4.31729	4.40458	3.74511	4.73513
68.8	5.95723	5.254	2.128	2.20146	6.29183	5.95723	2.97703	2.95654	4.129	4.41723	3.86463	5.11835
68.9	5.89891	5.53084	2.18601	2.16614	6.01251	5.89891	2.97244	2.97661	3.55723	3.79338	4.14352	4.87981
69	6.03199	5.42194	2.1847	2.08475	5.74899	6.03199	2.95634	2.95763	3.85988	4.33124	3.94588	4.7766
69.1	5.87725	5.3995	2.12684	2.11077	6.16548	5.87725	3.1441	2.97417	4.06198	3.8405	4.1032	5.0871
69.2	6.11906	5.52013	2.13826	2.11104	6.37392	6.11906	3.10998	3.09457	4.09666	3.81214	3.83799	5.40865
69.3	6.26398	5.40494	2.19151	2.1245	6.30659	6.26398	2.86782	2.86333	4.08257	4.42719	3.75144	4.53188
69.4	5.5946	5.10072	2.2278	2.2721	5.77317	5.5946	2.95797	2.9387	3.94952	3.82727	4.0625	4.15006
69.5	6.07545	5.15114	2.23806	2.18261	5.92556	6.07545	2.96205	2.9087	4.30013	3.97687	3.97103	4.60435
69.6	5.79444	5.42844	2.09741	2.21143	5.43054	5.79444	2.88501	2.8739	3.98288	3.898	4.02618	4.67288
69.7	6.44966	5.52043	2.13369	2.22867	6.58319	6.44966	2.88168	2.97813	4.17435	4.6602	4.0302	4.25633
69.8	5.79666	5.12505	2.27702	2.16919	6.21192	5.79666	2.93954	3.08349	4.10201	4.03728	3.96901	4.7728
69.9	6.4825	5.08007	2.19412	2.17772	6.46512	6.4825	3.02423	3.09892	4.65667	4.40683	4.20819	4.55491
70	5.97776	5.19853	2.17344	2.17999	6.82264	5.97776	2.90734	3.04692	4.88119	3.90928	4.17715	4.5907
70.1	6.24182	5.51158	2.23536	2.2208	6.80143	6.24182	3.15358	3.03306	4.36577	3.88109	4.08322	4.98777
70.2	5.24139	5.2764	2.28464	2.19693	6.46651	5.24139	3.04189	3.10088	4.25744	3.58432	3.97381	5.08925
70.3	5.72879	5.4874	2.13931	2.17962	7.06935	5.72879	2.86287	3.16516	4.57698	3.82343	3.93808	4.50127
70.4	6.16948	5.14572	2.22172	2.25983	6.51346	6.16948	2.94914	3.12719	4.40611	3.99023	4.03765	5.02635
70.5	6.40389	5.49059	2.17764	2.2869	6.46903	6.40389	2.9993	3.0975	3.98548	4.30128	4.13627	4.51968
70.6	6.26138	5.39515	2.16846	2.20666	6.63722	6.26138	2.86009	3.09203	4.18912	4.30479	3.85412	4.9364
70.7	5.5558	5.29923	2.15147	2.15729	6.29453	5.5558	2.97843	3.11834	4.0218	3.88166	4.27652	4.86588
70.8	6.22635	5.59795	2.25732	2.24898	6.5373	6.22635	3.00957	3.05418	3.87192	4.47737	3.77718	4.59619
70.9	5.99193	5.02644	2.16592	2.18321	5.88392	5.99193	3.27895	2.9958	4.26321	4.05877	3.90947	4.95256
71	6.00305	5.3457	2.19573	2.152	6.02226	6.00305	3.00719	2.90993	3.94687	3.89583	3.81334	5.3906
71.1	5.54501	5.36448	2.25442	2.17385	6.16091	5.54501	3.16563	3.06487	4.12273	3.90531	4.24322	5.34885
71.2	5.16394	5.14507	2.10989	2.39325	5.86449	5.16394	3.02475	3.05244	3.87062	3.81841	4.29353	5.37415
71.3	6.14279	5.33501	2.14185	2.33441	6.24634	6.14279	3.08033	2.98849	3.94727	3.9711	4.00554	5.1963
71.4	6.11173	5.18421	2.12796	2.22956	5.70355	6.11173	3.01655	3.24147	3.79411	4.01513	4.2458	5.28935
71.5	5.73126	5.29923	2.28264	2.31886	6.39297	5.73126	2.92596	2.90921	4.04156	3.7149	3.9472	5.2339
71.6	5.91643	5.3128	2.22768	2.24919	6.136	5.91643	2.95347	3.09443	4.16057	3.94349	4.09152	5.05285
71.7	5.8256	5.44554	2.22736	2.29595	6.29045	5.8256	2.98484	2.85668	4.06621	3.79237	3.99025	4.83183
71.8	5.72687	5.37078	2.18773	2.37831	6.28324	5.72687	3.17362	2.91682	4.32769	3.82058	4.19115	5.3677
71.9	5.69642	5.30016	2.13557	2.32626	5.91188	5.69642	3.14011	2.97155	4.20236	3.9469	4.30901	5.4848
72	5.5016	5.31841	2.23184	2.35726	6.04434	5.5016	2.9492	2.95491	4.20407	3.41617	3.95277	5.2659
72.1	5.40778	5.44503	2.19805	2.23271	5.77018	5.40778	3.0314	3.13475	4.01155	3.61228	4.13349	5.58435
72.2	6.05955	5.28831	2.21185	2.38267	6.12699	6.05955	2.91684	3.08096	4.14452	3.80192	4.09756	5.6173
72.3	5.74109	5.51577	2.25732	2.28036	6.19861	5.74109	3.0024	2.89012	4.29732	3.81263	4.10874	5.3453
72.4	6.05112	5.10198	2.18141	2.2603	5.99566	6.05112	3.02923	2.99227	3.89476	3.91024	3.92015	5.62785
72.5	5.69368	5.07822	2.16776	2.31436	5.77394	5.69368	3.03191	2.87177	3.69041	4.04394	3.99282	5.5628
72.6	5.67537	5.41312	2.24276	2.30475	6.00999	5.67537	3.17745	3.22951	3.84554	3.86558	4.26488	5.71445
72.7	5.77631	5.08296	2.18149	2.35473	5.65264	5.77631	3.05366	3.00741	3.89428	3.53151	4.25138	5.33755
72.8	6.23897	5.20528	2.16345	2.22942	5.90782	6.23897	3.00068	3.09589	3.93755	4.10218	4.24266	5.09375
72.9	6.0327	5.32862	2.17491	2.30153	6.40098	6.0327	2.93948	2.90631	4.15132	4.18727	3.92047	5.1004
73	5.8825	5.23466	2.18921	2.27841	5.69958	5.8825	3.26778	2.99924	3.863	3.698	4.25322	5.2243
73.1	5.89729	5.09828	2.17781	2.27565	5.62333	5.89729	3.15327	2.96496	3.76272	3.91901	4.2041	4.64653
73.2	5.8388	5.43114	2.21197	2.34951	6.66209	5.8388	2.90779	3.03578	4.34009	3.62086	4.10786	5.31395
73.3	5.8522	5.46752	2.15886	2.41739	6.80079	5.8522	2.92883	2.99413	4.59978	4.12068	4.03641	5.337
73.4	5.86041	5.23524	2.25333	2.31488	6.52414	5.86041	3.03007	2.94881	4.49651	4.09387	4.07286	5.88715
73.5	5.81649	5.16887	2.15249	2.27504	6.13117	5.81649	3.15477	2.9807	3.98665	3.68598	4.25931	5.066
73.6	5.71373	5.10702	2.16197	2.38847	5.81672	5.71373	3.02184	2.97093	3.90585	3.67509	3.96752	5.3743
73.7	5.56251	5.32998	2.12785	2.3099	6.03817	5.56251	2.98475	3.0019	4.29854	3.687	4.16264	5.10825
73.8	6.10785	5.18316	2.14809	2.27092	6.01996	6.10785	3.13166	2.87663	4.14569	3.92762	4.18494	5.10505
73.9	6.0626	5.08052	2.15239	2.33975	5.74574	6.0626	2.8738	2.86034	4.03109	3.64334	4.11718	5.4237
74	5.70425	5.37735	2.23953	2.33029	6.70459	5.70425	2.99433	3.03084	4.30521	3.8224	4.13014	4.85493
74.1	6.00279	5.41491	2.19676	2.29987	6.53776	6.00279	2.96562	2.99118	4.27712	3.88138	4.15321	5.0733
74.2	5.81653	5.16472	2.14857	2.33788	6.02181	5.81653	2.97018	3.1605	4.39494	3.64805	3.91709	5.1938
74.3	5.88761	5.02567	2.15354	2.24822	6.16552	5.88761	2.76374	2.88225	4.25746	4.04742	3.86976	5.24505
74.4	6.38446	5.33521	2.19366	2.2874	6.44471	6.38446	2.83895	3.10468	4.21152	4.12345	3.96077	5.37685
74.5	6.23841	5.11278	2.18036	2.3781	6.22301	6.23841	2.7911	3.14676	4.05527	3.8077	3.69544	5.28695
74.6	8.171	5.20348	2.22492	2.31695	5.61222	8.171	3.00619	2.86912	4.17171	3.89193	4.1073	5.3788
74.7	7.69907	5.15848	2.20833	2.1875	5.93628	7.69907	2.9319	3.17293	4.18776	3.75788	3.93363	5.15425
74.8	7.40177	5.27145	2.18643	2.18461	6.28138	7.40177	3.02728	2.97706	4.3949	3.77431	4.19737	5.39885
74.9	7.94921	5.12174	2.18853	2.19643	5.8278	7.94921	3.04218	3.03923	4.22616	3.86879	4.19865	5.36635
75	7.39504	5.10599	2.16932	2.16993	5.84725	7.39504	3.02124	2.95266	3.99923	4.36844	4.12394	5.07705
75.1	6.91671	5.16047	2.23417	2.17221	5.91301	6.91671	2.96394	3.05599	4.1247	3.79071	4.00573	5.18575
75.2	7.08535	5.21237	2.18888	2.19959	5.94923	7.08535	2.88031	2.91894	3.96606	3.7666	3.86423	5.9301
75.3	7.30783	5.20479	2.22562	2.18825	5.86773	7.30783	3.13881	2.92112	3.56591	3.67726	4.03036	5.34355
75.4	8.25627	5.44276	2.24883	2.16287	6.32263	8.25627	2.92717	3.0837	4.17321	4.03592	4.24139	5.33135
75.5	7.89011	5.4871	2.17259	2.30422	6.87133	7.89011	2.926	2.98694	4.62995	3.97885	4.22279	5.359
75.6	8.04156	5.25713	2.1558	2.32964	6.51099	8.04156	2.83098	3.08521	4.28674	3.84124	3.91379	5.56395
75.7	7.45573	5.28066	2.23608	2.25149	6.17833	7.45573	2.93033	2.99253	4.01647	3.84568	4.13324	4.85729
75.8	7.54645	5.1209	2.15937	2.16334	6.03047	7.54645	2.96329	3.10204	4.10729	3.72203	4.08735	5.4543
75.9	7.91791	5.31187	2.12745	2.21965	6.6378	7.91791	2.99306	3.16149	4.19189	4.07695	4.04333	5.21575
76	8.38624	5.28257	2.20823	2.1249	6.60021	8.38624	3.0071	2.97758	4.396	4.51061	4.14733	4.97038
76.1	8.63631	5.40135	2.19231	2.38424	5.85379	8.63631	3.10928	3.0072	4.03008	4.10493	4.13178	5.16295
76.2	7.44008	5.35639	2.19243	2.28611	5.92041	7.44008	2.93768	2.73189	3.88952	4.13241	4.02045	5.55895
76.3	7.27304	5.50763	2.22097	2.20661	6.42406	7.27304	2.85841	3.03585	3.85066	4.09758	3.94787	5.38955
76.4	7.09051	5.54556	2.26782	2.27286	6.41721	7.09051	2.90121	3.05665	3.89816	4.02	3.95876	5.5313
76.5	6.76544	5.28254	2.11675	2.24155	6.00155	6.76544	3.17657	3.15868	4.27243	3.59893	4.32981	5.593
76.6	5.78706	5.25418	2.17212	2.18965	5.80445	5.78706	3.06219	3.061	3.70169	3.81079	4.37214	5.6204
76.7	5.75908	5.20867	2.17664	2.17996	5.95063	5.75908	3.11477	3.19629	4.38569	4.084	4.45778	5.31775
76.8	5.22007	5.07477	2.22084	2.20328	6.02553	5.22007	3.0046	3.13524	4.09236	3.77611	4.28266	5.43545
76.9	5.99805	5.18658	2.1888	2.23451	6.16021	5.99805	3.00126	2.97843	4.32321	3.71035	4.33282	5.66395
77	5.48814	5.2294	2.26627	2.26243	6.25666	5.48814	2.90835	3.24671	4.25341	3.73929	4.13148	5.39615
77.1	5.79675	5.06092	2.1645	2.19275	5.43363	5.79675	3.01814	3.19047	4.05307	3.70601	4.29345	5.67385
77.2	5.67129	5.29258	2.15644	2.18507	6.31297	5.67129	2.69667	3.13829	4.3842	3.84242	4.1118	5.41205
77.3	6.21182	5.18926	2.19945	2.15609	6.3809	6.21182	2.90661	2.98006	4.57918	4.06614	4.1719	5.36415
77.4	5.58437	5.02367	2.1934	2.15243	6.14563	5.58437	2.96391	3.15383	4.97546	3.86449	4.01042	4.94843
77.5	6.46403	5.31684	2.14223	2.1941	6.35052	6.46403	3.0616	3.11286	4.45475	4.09175	4.02925	4.8671
77.6	5.98438	5.19292	2.17817	2.15275	6.21899	5.98438	2.93415	3.32107	4.37486	3.89831	4.04745	5.21875
77.7	5.06158	5.00223	2.24565	2.16609	6.15367	5.06158	2.8767	3.08126	4.35696	3.71895	3.88404	5.1023
77.8	5.85203	5.28488	2.17795	2.18427	6.48219	5.85203	2.92718	2.92653	4.57749	3.81146	4.14384	5.2036
77.9	6.49939	5.37444	2.16858	2.26923	5.94191	6.49939	2.89823	3.12949	4.17289	3.89532	4.16768	5.43705
78	5.92307	5.29441	2.25423	2.2121	5.64666	5.92307	2.79216	3.1883	3.99722	3.77951	4.12843	5.75075
78.1	6.61477	5.14952	2.21258	2.18238	6.11494	6.61477	2.86633	2.96174	4.13533	4.21373	4.16816	5.01955
78.2	6.35639	5.65888	2.08053	2.21913	6.58625	6.35639	2.82932	2.97619	4.2812	3.7284	3.98731	5.37765
78.3	6.43438	5.49244	2.15471	2.18706	6.44644	6.43438	3.09539	3.02052	4.14261	4.02442	4.0635	5.11185
78.4	6.17038	5.27133	2.17203	2.20355	5.86069	6.17038	2.90608	3.13689	4.0453	4.03003	3.87263	5.6757
78.5	5.6981	5.30063	2.15889	2.27187	5.67817	5.6981	2.93705	2.98631	3.85173	3.63705	4.23517	5.31115
78.6	5.82417	5.20284	2.2013	2.2878	5.81776	5.82417	2.98967	3.17843	3.89699	3.89281	4.27808	5.0809
78.7	6.17142	5.14921	2.29682	2.21006	5.31541	6.17142	3.04778	2.91077	3.79438	3.91669	4.2499	4.64684
78.8	6.06752	5.16649	2.07597	2.24835	5.2329	6.06752	2.97156	3.16356	3.80958	3.95085	4.28078	4.82799
78.9	5.49883	5.54892	2.01328	2.16769	5.95624	5.49883	3.02221	3.0023	3.81277	3.70961	3.8276	4.59037
79	5.8087	5.21898	2.10756	2.19934	5.63789	5.8087	2.9093	3.01902	3.87106	3.83472	3.94645	4.42593
79.1	5.95043	5.61705	2.05434	2.21786	6.55449	5.95043	2.88246	3.12921	4.24245	3.90281	3.81296	4.65735
79.2	5.34736	5.34977	2.06768	2.17908	6.44677	5.34736	2.83207	3.10342	4.1307	3.80732	4.03577	4.28032
79.3	5.77184	5.45329	2.05057	2.17693	6.21544	5.77184	2.78679	3.20365	3.76608	4.05945	3.78064	4.59842
79.4	5.20613	5.25386	2.03294	2.35752	6.05931	5.20613	3.04648	3.03404	4.05881	3.64898	4.01787	5.0648
79.5	5.96412	5.29501	2.08647	2.23444	6.09921	5.96412	2.97069	3.06328	3.65041	3.95527	3.71651	4.61902
79.6	5.24111	5.12336	2.10078	2.16845	6.0548	5.24111	2.68	3.15779	3.92969	3.97762	3.90769	4.57688
79.7	6.1665	5.09037	2.06108	2.27585	6.9444	6.1665	2.98735	3.1243	4.74252	4.15127	4.18889	4.2469
79.8	6.28815	5.39529	2.21211	2.2216	6.40228	6.28815	2.98964	3.13911	3.9497	4.73745	3.93337	4.4954
79.9	5.75485	5.22194	2.1032	2.19868	5.90536	5.75485	2.97784	3.06068	4.13192	3.81011	3.65714	4.36511
80	6.55789	5.58727	2.10363	2.13128	6.46312	6.55789	3.09613	3.14213	3.73979	4.47227	3.73673	4.09847
80.1	6.02943	5.44943	2.06811	2.28155	6.31016	6.02943	2.91032	3.07997	3.86393	4.18367	3.72377	4.40759
80.2	5.97022	5.08666	2.14161	2.19996	5.47225	5.97022	3.07004	3.13714	3.80125	3.97125	3.85676	4.91568
80.3	6.44367	5.37369	2.1504	2.20174	6.13547	6.44367	3.06707	2.90013	4.26269	4.32768	4.20337	4.43555
80.4	5.41031	5.2443	2.16894	2.17646	6.05228	5.41031	2.83449	3.0622	4.08453	3.52515	3.91757	4.58136
80.5	5.48833	5.66139	2.05133	2.1343	6.52339	5.48833	2.99988	3.35148	3.99309	3.53147	4.11525	4.50863
80.6	6.15172	5.04639	2.14233	2.21674	6.13539	6.15172	2.87285	3.24471	4.04254	3.83608	4.07463	4.5313
80.7	6.17404	5.28727	2.13673	2.23722	6.07149	6.17404	2.85842	3.09917	4.12249	3.8262	4.03768	4.24024
80.8	5.32765	5.14278	2.11398	2.24975	5.97152	5.32765	2.93343	3.03645	4.03334	3.83527	4.1102	5.29065
80.9	6.18988	5.3048	2.10681	2.22641	6.39313	6.18988	2.9337	3.08112	3.81532	3.7977	4.03995	4.64473
81	5.48904	5.23541	2.0823	2.19272	6.2061	5.48904	2.77448	3.06106	3.81257	3.69049	3.9444	4.96307
81.1	6.36515	5.40917	2.13941	2.23476	5.76247	6.36515	3.10663	2.96599	3.73429	3.8524	3.77228	5.0837
81.2	5.41754	5.5673	2.06932	2.29794	6.70033	5.41754	2.86393	3.17736	4.7028	3.64445	3.62731	5.29565
81.3	6.18837	5.45195	2.15958	2.15285	6.41713	6.18837	2.82029	3.08318	4.05249	3.77702	3.73482	5.3966
81.4	6.03712	5.59086	2.13274	2.18934	6.05208	6.03712	2.94938	3.19968	3.44865	3.92598	3.87848	5.0837
81.5	5.74697	5.01467	2.10031	2.12206	6.31607	5.74697	2.89569	3.18094	4.13293	3.70538	3.80959	5.55175
81.6	6.4664	5.50324	2.08386	2.16682	6.29562	6.4664	3.06122	3.23739	4.25607	4.24303	4.25238	5.2193
81.7	6.4044	5.11081	2.07938	2.14649	5.98836	6.4044	3.01114	2.90498	4.03131	4.06457	4.08889	5.0761
81.8	6.21178	5.10741	2.26269	2.17469	6.57193	6.21178	3.13435	3.04085	4.49402	4.01642	4.23151	5.41735
81.9	6.35576	5.22314	2.12751	2.30272	6.36995	6.35576	2.96264	3.1761	3.90571	4.1657	4.03557	4.86867
82	6.01982	5.32852	2.03281	2.20466	6.50822	6.01982	2.88414	2.98265	4.13362	4.04089	4.07433	4.98958
82.1	6.03013	4.99103	2.09335	2.25151	5.75129	6.03013	2.79597	3.09193	3.87868	3.8966	4.06661	4.92873
82.2	5.62747	5.03766	2.09437	2.20011	5.88021	5.62747	2.87114	3.14802	4.21673	3.42088	4.02924	5.09345
82.3	5.41112	5.42262	2.08445	2.27547	6.33033	5.41112	3.01521	2.97553	4.01403	3.69978	4.18096	5.2264
82.4	5.85271	5.03127	2.21197	2.28499	6.43032	5.85271	3.14239	3.14456	4.43126	3.72264	4.40402	4.71013
82.5	5.55715	5.25771	2.19163	2.20022	6.49558	5.55715	2.73654	3.11749	4.47542	3.73732	4.19971	4.55495
82.6	5.54782	5.25894	2.14014	2.35959	6.36749	5.54782	3.03389	3.11659	4.16041	3.76023	4.14845	4.79687
82.7	5.64637	5.22122	2.10741	2.29114	6.49592	5.64637	2.86812	2.89219	4.48827	3.54026	4.24153	4.73349
82.8	5.14147	5.23247	2.19881	2.20026	6.96636	5.14147	2.84471	3.15955	4.64794	3.38951	4.01357	4.88453
82.9	5.67978	5.3163	2.17027	2.20899	5.44108	5.67978	3.17686	3.18844	3.75311	3.90077	4.30688	4.45211
83	6.08994	5.30216	2.13137	2.25407	5.62516	6.08994	2.8744	3.10014	3.87975	4.27697	4.00645	4.47386
83.1	6.2153	5.31271	2.1851	2.26033	5.51809	6.2153	3.12642	2.99826	3.75624	4.21115	4.14583	4.52391
83.2	5.79786	5.33106	2.27186	2.19989	5.7153	5.79786	2.96274	3.028	3.73659	3.75723	4.06021	4.79608
83.3	5.92241	5.09772	2.2424	2.18579	4.97996	5.92241	3.13981	3.08194	3.83418	3.81946	4.35631	4.78052
83.4	5.80883	5.48316	2.16447	2.13903	5.10243	5.80883	2.99542	3.01669	3.68282	3.69807	4.14718	4.70552
83.5	6.17295	5.50873	2.17392	2.31078	6.15768	6.17295	2.93805	3.08068	4.13615	3.88573	3.863	4.50849
83.6	5.73282	5.1845	2.17096	2.17619	5.74135	5.73282	2.91501	3.15887	4.07285	3.88431	4.15646	4.84881
83.7	6.43271	5.20732	2.19654	2.20614	5.74498	6.43271	2.96229	3.21757	3.83435	3.78004	4.27193	5.14635
83.8	6.31802	5.2942	2.16087	2.29941	6.01361	6.31802	3.00783	3.06552	3.97582	4.10461	3.93989	4.84645
83.9	5.89623	5.43086	2.16676	2.31357	5.5899	5.89623	2.96284	3.09838	3.93117	3.94432	4.13756	5.19435
84	5.71556	5.34725	2.15549	2.1934	5.85705	5.71556	2.87228	3.17489	3.90917	3.72024	4.07863	5.3144
84.1	5.87577	5.26433	2.18468	2.16601	5.71399	5.87577	2.98836	3.00175	3.94051	3.84708	3.84489	5.41645
84.2	5.95258	5.20257	2.18034	2.2394	5.50094	5.95258	3.14094	2.94722	4.02147	3.89041	4.22919	5.16295
84.3	6.79647	5.19071	2.15381	2.18601	5.71643	6.79647	3.09865	2.90421	4.12211	3.88246	4.33127	5.0513
84.4	5.99095	5.37941	2.16687	2.24573	5.88727	5.99095	2.89906	3.08914	3.73033	3.73625	4.06134	4.76976
84.5	5.97643	4.97982	2.19987	2.29257	5.61686	5.97643	3.1454	2.91629	4.14138	3.59293	4.11942	4.45739
84.6	5.98936	5.13661	2.19292	2.16812	5.26832	5.98936	3.13455	2.96133	3.93324	3.59823	4.30805	4.38581
84.7	5.90831	5.2985	2.16614	2.21853	5.94454	5.90831	2.92384	3.06916	3.68187	3.86565	4.1087	4.42246
84.8	6.02126	5.07268	2.2471	2.23754	5.3602	6.02126	3.00213	3.17479	3.75144	3.81488	4.07991	4.38268
84.9	5.82848	5.08169	2.2672	2.23228	6.30386	5.82848	2.88865	3.04675	4.28951	3.73793	4.03132	4.73197
85	5.75729	5.57485	2.14861	2.14864	6.54014	5.75729	2.75789	3.08147	4.1706	3.84109	3.90171	4.65938
85.1	5.70688	5.16033	2.23111	2.23357	5.36912	5.70688	2.95875	2.97963	4.10923	3.79257	4.25893	4.29284
85.2	5.72358	5.14842	2.24028	2.14128	5.41795	5.72358	2.91032	2.91152	3.87421	3.9824	4.15052	4.56636
85.3	5.79455	5.35465	2.20046	2.1551	5.8736	5.79455	3.00073	3.01124	3.87742	3.75088	3.8519	4.46151
85.4	5.38217	5.56986	2.14276	2.13875	6.80758	5.38217	2.92357	3.32739	4.26469	3.99309	3.71124	4.31393
85.5	5.54132	5.308	2.12081	2.20781	6.40434	5.54132	3.01553	3.00471	4.29062	3.52203	3.95955	5.00105
85.6	5.21009	5.44377	2.17051	2.18745	6.05044	5.21009	3.01722	3.07002	4.19741	3.75419	4.07992	5.1672
85.7	5.14739	5.32386	2.24829	2.23667	6.70948	5.14739	2.90446	3.06328	4.37354	3.61775	4.05662	5.5443
85.8	5.16066	5.49948	2.16676	2.23954	6.04898	5.16066	2.95176	3.15183	4.10003	3.69116	4.0035	5.2793
85.9	6.04631	5.27388	2.17883	2.2209	6.81841	6.04631	2.96645	3.24433	4.92475	4.41469	3.96935	5.46125
86	5.71719	5.45925	2.24291	2.18703	6.68635	5.71719	2.9541	3.10065	4.06329	4.05857	3.89897	5.7634
86.1	5.3483	5.44964	2.20269	2.21034	7.07408	5.3483	2.85856	3.16872	4.64795	3.69152	3.90567	5.67405
86.2	5.07137	5.63607	2.26746	2.23251	7.51002	5.07137	3.02926	2.99779	4.67601	3.67234	3.72956	5.2506
86.3	5.37092	5.64964	2.21244	2.20117	6.9779	5.37092	3.03344	2.99592	4.81863	3.65467	4.29747	5.71375
86.4	5.4592	5.42535	2.17801	2.15489	7.34781	5.4592	2.88856	3.15685	4.7398	4.10131	3.76979	5.21145
86.5	5.35925	5.71542	2.17338	2.14105	7.28674	5.35925	2.88211	3.07857	4.77316	3.77546	4.12064	5.20035
86.6	5.90114	5.38169	2.16893	2.19338	6.64551	5.90114	2.97981	3.21489	4.50002	3.83929	4.08369	5.2918
86.7	5.76234	5.43808	2.16125	2.19972	7.00246	5.76234	2.96859	3.05518	4.71969	3.61901	4.23686	5.51245
86.8	5.61876	5.43532	2.27317	2.12243	6.86168	5.61876	3.27239	3.05752	4.61585	3.75815	4.22158	5.5863
86.9	5.94753	5.72415	2.10555	2.1197	7.42464	5.94753	2.85279	3.16024	4.82083	4.01152	3.94139	5.45155
87	5.78097	5.66679	2.22101	2.05126	6.99093	5.78097	2.85202	3.23503	4.35348	4.08645	3.68712	5.6774
87.1	5.5896	5.41099	2.19085	2.1229	6.90387	5.5896	2.81361	3.0798	4.68356	3.65011	3.76148	5.6533
87.2	5.17762	5.76693	2.21121	2.19337	7.16657	5.17762	2.77462	3.11339	4.64188	3.81874	3.99804	5.4412
87.3	5.67099	5.44986	2.21884	2.16472	6.65852	5.67099	2.84651	3.02781	4.51549	3.64727	3.87605	5.35975
87.4	5.71789	5.31768	2.10699	2.14782	6.3442	5.71789	2.84253	3.08156	4.52914	3.75169	3.99207	5.67725
87.5	5.97739	5.46605	2.24647	2.17672	6.5897	5.97739	3.1053	3.19284	4.03263	3.95755	3.86275	5.4081
87.6	5.64882	5.39921	2.22263	2.22918	5.73574	5.64882	2.92949	2.68632	3.78476	3.75157	4.06732	5.243
87.7	6.01269	5.27499	2.14541	2.21433	5.90239	6.01269	2.7859	3.1048	3.76166	3.8323	3.84057	5.3706
87.8	5.84135	5.16772	2.21549	2.18919	5.6453	5.84135	2.76593	3.08712	3.68128	3.97514	3.54841	5.0936
87.9	5.91611	5.33407	2.21014	2.18249	6.73256	5.91611	3.08139	3.12651	4.39098	3.92712	4.2101	5.23465
88	5.79239	5.13943	2.19584	2.21727	5.55136	5.79239	2.99711	3.11074	4.06154	3.89703	4.16207	5.29135
88.1	5.2532	5.11125	2.21204	2.31025	5.69198	5.2532	2.87993	3.29073	3.67795	3.64181	4.17968	5.30655
88.2	5.63213	5.21054	2.19155	2.19543	5.90218	5.63213	2.96416	3.11184	3.99629	3.9091	3.78032	4.59549
88.3	6.09552	5.25247	2.23155	2.23765	6.45388	6.09552	2.89494	3.17969	4.26656	4.03248	3.91532	4.80716
88.4	5.4268	5.57163	2.18725	2.21312	6.61684	5.4268	2.87917	2.97072	4.16899	3.85495	3.98137	4.9135
88.5	5.60696	5.23583	2.22606	2.15276	5.66639	5.60696	2.98717	3.08674	3.77937	3.83176	4.21863	4.93337
88.6	5.44234	5.34992	2.22799	2.16011	5.85955	5.44234	2.80924	3.05849	4.06245	3.94258	3.85492	5.01375
88.7	6.32752	5.37559	2.1496	2.1917	5.74893	6.32752	2.7523	2.8984	3.90022	4.19045	3.81047	5.0563
88.8	6.33042	5.10692	2.22375	2.14825	5.9527	6.33042	2.80983	2.92672	3.98719	3.95991	3.86535	5.283
88.9	5.859	5.29779	2.16073	2.2452	6.14066	5.859	2.87276	3.09024	4.27766	3.98708	3.86979	5.214
89	5.81397	5.3865	2.17912	2.15906	6.07356	5.81397	2.76003	3.03061	4.08755	3.71312	3.94053	5.0148
89.1	5.68103	5.45317	2.13996	2.20568	5.94895	5.68103	2.75659	3.15245	4.11419	3.99657	3.66472	5.2876
89.2	5.84452	5.18728	2.28952	2.3066	5.89546	5.84452	3.06032	3.34166	4.27213	3.77938	4.04753	4.827
89.3	5.28224	4.9239	2.20573	2.34252	5.0805	5.28224	2.86728	3.09758	3.6411	3.52061	4.1601	4.86381
89.4	5.9433	5.38978	2.19659	2.18864	5.90088	5.9433	2.96449	3.28665	4.05168	3.69097	3.91098	4.77874
89.5	5.93292	5.24932	2.18255	2.2918	6.17206	5.93292	2.75553	2.90664	4.06673	3.43297	3.72647	4.96385
89.6	5.50207	5.45791	2.18102	2.23677	6.03704	5.50207	2.9908	2.98537	3.8195	3.78123	3.99147	4.73583
89.7	5.78415	5.25079	2.12277	2.44264	6.40427	5.78415	2.85974	2.91864	4.04312	3.79549	3.87426	4.87549
89.8	6.02372	5.63473	2.10637	2.30429	6.73608	6.02372	2.89668	2.86343	4.08636	3.64569	3.90714	5.0915
89.9	5.77151	5.22449	2.14125	2.29686	6.06593	5.77151	2.90723	2.9598	4.38814	3.51562	3.91322	4.86902
90	5.18164	5.4462	2.22765	2.37616	6.39684	5.18164	2.85074	3.1112	4.05492	3.61104	3.83385	5.53875
90.1	5.24291	5.27844	2.13922	2.27463	6.1857	5.24291	2.92061	2.99301	4.24625	3.70119	4.06781	5.07515
90.2	5.72234	5.37261	2.12221	2.28227	6.18959	5.72234	2.93495	3.07919	4.04174	3.72351	4.08376	4.78369
90.3	5.94508	4.99667	2.13143	2.37663	5.76224	5.94508	2.75054	2.89179	4.08782	3.47356	4.14432	4.86061
90.4	6.13934	5.2713	2.16505	2.37828	6.44219	6.13934	2.85411	2.97932	4.18923	3.63572	3.96125	5.1229
90.5	5.73348	5.34783	2.20948	2.39777	5.87875	5.73348	2.76656	3.11695	3.69522	3.63155	3.80382	5.3545
90.6	5.96434	5.36534	2.24714	2.38559	5.90085	5.96434	2.92388	3.05668	3.86882	3.78552	3.96969	5.15165
90.7	5.82932	5.26264	2.15482	2.31426	5.56982	5.82932	2.84802	3.00927	3.92332	3.64146	4.11303	5.033
90.8	5.67333	5.30436	2.17546	2.40587	6.33734	5.67333	2.89733	2.96227	4.12272	3.54713	3.8443	5.46035
90.9	6.07624	5.64339	2.12099	2.39389	6.86507	6.07624	3.05327	3.12458	4.26683	3.5681	4.2692	5.3598
91	5.82582	5.59122	2.20666	2.37032	6.75373	5.82582	3.02636	2.96456	4.00267	3.73959	3.81973	4.92641
91.1	6.34983	5.57874	2.10731	2.27321	6.70514	6.34983	3.13483	3.16021	4.28197	3.9823	4.10681	5.27865
91.2	5.81269	5.72408	2.13643	2.34451	6.87951	5.81269	2.8923	2.97419	4.37723	3.66292	4.05175	5.39525
91.3	6.36914	5.60368	2.20127	2.35045	6.63626	6.36914	2.81987	2.96267	3.7554	3.72196	4.04055	5.346
91.4	5.36669	5.28235	2.15058	2.3023	6.41876	5.36669	3.02892	3.03146	4.06393	3.76364	4.12159	5.45345
91.5	6.66333	5.50178	2.22152	2.27286	5.92997	6.66333	2.80128	2.91655	3.67027	3.90694	3.80835	5.64045
91.6	5.82102	5.47888	2.1643	2.29907	5.97126	5.82102	2.87953	3.09811	3.96005	3.8109	4.19725	5.1887
91.7	5.7892	5.12343	2.12142	2.25625	5.57694	5.7892	2.92738	2.80017	3.82688	3.80033	4.20303	5.33745
91.8	5.90982	5.93863	2.18187	2.26673	6.53391	5.90982	2.792	2.98567	3.98644	3.70167	3.97512	5.72345
91.9	6.36681	5.53745	2.19164	2.30823	6.68581	6.36681	2.79299	3.00122	3.73879	3.92853	3.91331	4.88197
92	5.60548	6.1867	2.13932	2.27075	7.15271	5.60548	3.11332	3.02678	3.75305	3.58409	4.38749	5.1173
92.1	5.45468	6.07045	2.23893	2.26804	8.10116	5.45468	2.84822	3.02674	4.05734	3.89272	4.04588	5.22595
92.2	5.55896	5.2148	2.21787	2.32673	6.44805	5.55896	2.89489	3.03828	3.95919	3.4667	4.04093	5.391
92.3	6.99446	6.1518	2.1636	2.2001	7.89823	6.99446	2.92497	2.82668	4.22422	3.92435	4.28552	5.2223
92.4	6.5553	6.0455	2.16393	2.28317	7.78864	6.5553	2.80475	2.84267	4.14141	3.94274	3.82218	5.3684
92.5	5.92103	5.8966	2.19628	2.20098	6.90031	5.92103	2.85369	2.90295	3.86962	3.94881	4.04063	5.3447
92.6	6.98211	5.7749	2.17293	2.31381	7.43613	6.98211	2.88346	2.78533	4.25603	4.82497	3.88659	5.4072
92.7	7.2794	6.2712	2.15132	2.20527	8.40469	7.2794	2.791	3.2981	4.30173	4.52437	3.92692	5.56905
92.8	7.21626	6.35795	2.20377	2.27565	8.05327	7.21626	2.79521	2.77919	3.6359	4.92044	3.63527	4.96766
92.9	7.38173	6.4354	2.16753	2.28347	7.71641	7.38173	3.00524	2.83035	3.92942	4.90067	3.9594	4.98388
93	7.75991	6.19215	2.18927	2.30211	8.1046	7.75991	3.02099	3.09544	4.09403	5.2269	4.03818	5.2776
93.1	7.44004	6.07145	2.18693	2.16576	7.54315	7.44004	2.84795	3.16111	4.10676	4.71419	3.80811	5.2593
93.2	8.6281	6.11465	2.10589	2.24053	7.9901	8.6281	2.78272	3.01605	4.17906	4.61075	4.01914	4.98231
93.3	9.60433	6.14735	2.19563	2.27756	7.00315	9.60433	2.81469	2.90047	3.76706	4.86324	4.21386	5.4745
93.4	9.06086	5.7904	2.2116	2.14187	6.95524	9.06086	2.9193	3.13027	3.72214	5.2758	4.31114	5.44715
93.5	8.45005	6.244	2.19082	2.18132	7.96841	8.45005	3.26281	2.79832	4.01131	4.6574	4.10048	5.28205
93.6	9.09622	5.8647	2.17391	2.35219	6.85525	9.09622	3.0336	2.97298	3.747	4.77613	4.10939	5.25315
93.7	8.31148	6.00765	2.15463	2.17947	7.43039	8.31148	2.87248	3.16978	4.09335	4.57519	4.24291	5.40125
93.8	8.83516	5.8817	2.1745	2.30652	6.76927	8.83516	2.96568	3.15251	3.6287	4.77189	4.20834	5.27585
93.9	9.20951	6.23685	2.1757	2.29632	7.18756	9.20951	2.93026	3.07637	3.70586	5.2602	4.2607	5.1496
94	8.61847	5.82275	2.19229	2.12962	6.06691	8.61847	2.86242	2.78996	3.55248	4.47217	4.33163	5.28465
94.1	8.70949	5.84835	2.40361	2.34187	6.67408	8.70949	2.61028	2.91648	3.72915	4.859	4.05375	5.28965
94.2	8.8987	6.0902	2.21606	2.29006	6.54457	8.8987	2.65335	2.79024	3.72448	4.75449	4.28838	5.64995
94.3	9.30138	6.2899	2.14869	2.31333	7.23318	9.30138	3.0442	3.14883	3.91041	5.0251	4.17467	5.1473
94.4	8.10773	5.465	2.18164	2.21229	6.3703	8.10773	3.04378	2.99657	3.87458	4.47753	3.97611	5.1497
94.5	8.63138	6.54495	2.25215	2.17389	7.29891	8.63138	3.13758	3.19798	3.89691	4.32688	4.17578	5.20975
94.6	7.26724	5.61695	2.16597	2.42434	6.56057	7.26724	3.09078	3.31751	3.97743	4.15052	4.02656	5.3649
94.7	7.90189	6.35	2.2815	2.30516	7.28071	7.90189	3.05498	3.07708	4.2167	4.12471	3.88212	5.06035
94.8	7.4889	6.0414	2.27747	2.42658	6.49463	7.4889	2.79078	3.01629	3.6786	3.71815	4.25526	5.35415
94.9	7.4509	5.9181	2.34125	2.24019	6.72401	7.4509	2.93874	3.04208	4.05457	3.6869	3.96122	5.00695
95	8.13261	5.96395	2.26931	2.34513	6.36283	8.13261	3.10133	3.17497	3.85692	4.06665	4.08337	5.94755
95.1	7.94675	5.85445	2.34372	2.19692	7.16691	7.94675	3.01531	3.03453	4.35443	4.88117	4.00293	5.1652
95.2	8.03151	5.6785	2.20892	2.29491	7.23709	8.03151	3.32725	3.13354	3.85522	4.22023	3.92621	5.07175
95.3	6.84713	5.7999	2.22044	2.2906	6.99441	6.84713	2.99093	3.254	3.96048	4.7421	4.02986	5.5716
95.4	7.13112	6.40955	2.24312	2.25881	7.87502	7.13112	3.12717	3.07628	3.97085	4.5986	4.5858	5.0329
95.5	6.5618	5.6333	2.20637	2.27358	7.41166	6.5618	3.08787	2.94184	4.11935	4.20851	4.88997	5.20365
95.6	6.35899	5.3511	2.27131	2.20601	7.07493	6.35899	3.16292	2.95128	4.13668	4.60107	4.20041	5.5636
95.7	6.63714	5.7793	2.13409	2.18124	7.70825	6.63714	3.07485	2.99577	4.55903	4.47168	4.55827	5.23645
95.8	6.02606	6.2644	2.16032	2.26742	7.72343	6.02606	2.5532	3.13934	3.96725	4.29263	4.379	5.17545
95.9	6.19931	5.53525	2.2266	2.27037	6.9096	6.19931	2.84999	3.02477	4.43213	4.14767	4.48207	5.38445
96	5.79713	6.36445	2.13499	2.20286	8.20285	5.79713	2.96689	2.95802	4.26336	4.39721	4.52994	5.15925
96.1	6.37512	5.62785	2.1938	2.37617	6.16372	6.37512	2.97513	3.0482	3.79918	4.56386	4.43809	5.5071
96.2	6.24092	5.8945	2.16442	2.34662	6.16221	6.24092	3.07501	2.7529	3.96098	4.20744	4.59794	5.4858
96.3	5.49323	6.22295	2.16008	2.3647	7.64353	5.49323	2.93665	3.07675	3.84302	4.20183	4.13023	5.414
96.4	6.00765	5.69195	2.17715	2.30394	7.21103	6.00765	2.86469	2.96446	4.22114	4.55755	3.98927	5.76575
96.5	5.7926	6.03995	2.17553	2.33546	7.05415	5.7926	3.01279	2.80708	3.83134	4.47912	4.49586	5.5765
96.6	6.00577	6.09985	2.22409	2.27531	7.45845	6.00577	2.81669	3.29469	3.70449	4.27576	4.30951	5.1189
96.7	5.77895	5.98605	2.15564	2.23742	6.91974	5.77895	2.91764	3.03085	3.69961	4.42953	4.61226	4.97213
96.8	5.9586	5.5533	2.17443	2.30158	6.68631	5.9586	2.94598	3.04974	4.29598	4.24474	4.36403	5.13435
96.9	6.01077	5.60505	2.12914	2.20825	6.80152	6.01077	3.02359	2.93363	4.12371	4.43795	4.10684	5.17105
97	6.21063	5.96415	2.23209	2.32806	7.16477	6.21063	2.93755	2.91358	3.8765	4.19043	4.20199	5.1141
97.1	6.41265	5.4018	2.19114	2.23917	6.75117	6.41265	3.02321	2.82646	3.96239	4.22441	3.95267	5.2895
97.2	5.56431	6.0467	2.1493	2.22686	7.29408	5.56431	2.98817	2.85677	4.22206	4.27459	4.22472	5.4434
97.3	6.40811	5.35815	2.14601	2.38613	6.63584	6.40811	2.92782	2.97647	3.92958	4.42317	4.27291	5.3321
97.4	5.85574	5.86315	2.21313	2.26759	7.20346	5.85574	2.89244	2.96927	4.06022	4.15463	3.96079	5.7124
97.5	6.1406	5.84355	2.15308	2.24952	6.92818	6.1406	2.86248	2.87414	4.05289	4.27773	4.15562	5.3461
97.6	6.25566	5.94065	2.27082	2.18817	7.35499	6.25566	2.94805	2.93227	3.64851	4.37971	4.23774	5.3174
97.7	6.41791	6.365	2.21893	2.34174	7.94883	6.41791	2.93466	3.02882	4.091	4.47117	4.3163	5.69165
97.8	6.31482	5.7244	2.30112	2.35367	7.0931	6.31482	2.79537	3.02081	3.77994	3.85384	4.22469	5.6397
97.9	6.41008	5.8196	2.19462	2.24342	7.04303	6.41008	2.86895	2.94367	4.20739	4.40266	4.27861	5.2352
98	5.70256	5.7045	2.16513	2.20903	7.0412	5.70256	2.93363	3.04286	3.92998	4.40551	4.09376	5.20425
98.1	6.1261	6.0329	2.2114	2.30026	7.66404	6.1261	3.19805	2.97307	4.06123	4.22544	3.95449	5.2521
98.2	6.02724	5.63175	2.15397	2.1978	7.37333	6.02724	2.99583	2.72203	4.33442	4.11432	4.07755	5.29335
98.3	5.82439	5.5376	2.21159	2.24626	6.79964	5.82439	3.00284	3.05006	3.82332	4.07992	4.23072	5.76405
98.4	5.46694	5.86955	2.22461	2.24871	7.48923	5.46694	3.03478	3.00045	4.17596	3.63245	4.4609	5.7952
98.5	4.76598	6.299	2.25371	2.21369	8.02692	4.76598	3.02618	2.9452	4.06686	3.67147	4.54024	5.046
98.6	6.133	5.82735	2.14594	2.19795	7.13612	6.133	3.02912	3.35849	4.22164	3.73618	4.73217	4.73829
98.7	5.26138	5.9001	2.20573	2.29898	7.2296	5.26138	2.83249	3.01708	4.00219	3.78751	4.43156	5.07965
98.8	5.46859	5.7082	2.25411	2.18242	7.69762	5.46859	2.85685	2.96541	3.9226	3.75736	4.37269	4.91882
98.9	5.81614	6.0861	2.15618	2.25941	7.88143	5.81614	2.90801	2.97975	4.07662	3.6789	4.4286	5.2643
99	5.04073	6.00745	2.14454	2.3038	7.58094	5.04073	2.92469	3.02363	4.07218	3.69158	4.22062	5.32525
99.1	6.06258	5.5888	2.17252	2.23395	6.81247	6.06258	3.30153	2.94337	4.06942	4	4.11549	5.1179
99.2	5.18433	5.6933	2.23185	2.28815	6.8705	5.18433	2.92763	2.97328	4.03606	3.72005	3.96874	5.43725
99.3	5.74075	6.0363	2.2414	2.37368	7.75856	5.74075	2.95131	3.04705	4.3508	4.1338	4.1148	5.41845
99.4	5.22344	6.16535	2.30173	2.29572	7.51013	5.22344	2.78601	2.98416	4.27834	3.69762	4.01146	5.24755
99.5	4.89095	6.025	2.48986	2.33685	6.97548	4.89095	2.9486	3.15593	4.21319	3.60367	3.86751	5.1156
99.6	6.05068	6.07005	2.16698	2.19246	7.90089	6.05068	3.07432	2.98984	4.71037	3.89654	4.18207	5.0282
99.7	5.36174	5.6198	2.22367	2.27833	7.33409	5.36174	2.90076	3.13912	4.06396	3.89603	4.032	5.23665
99.8	5.64339	6.38475	2.35184	2.31278	8.16076	5.64339	2.93969	2.92386	4.64933	3.98862	4.00193	5.7892
99.9	5.59394	6.19905	2.32698	2.25739	7.74512	5.59394	3	3.02705	4.33015	3.90647	4.13454	5.2902
100	5.82098	5.8196	2.21616	2.30088	7.57906	5.82098	3.16221	2.95182	4.46401	3.70893	3.9658	5.2129
100.1	5.65712	6.45155	2.44385	2.30348	7.99169	5.65712	3.0733	2.90035	4.19481	3.76777	4.05648	4.98754
100.2	5.8084	5.30725	2.27876	2.25459	6.94857	5.8084	3.06744	3.03064	4.3827	3.81151	4.30567	5.1604
100.3	5.40304	5.18465	2.27808	2.23997	6.97921	5.40304	3.03421	2.91362	4.68805	3.82744	3.96313	4.90545
100.4	5.37905	6.48475	2.30337	2.24161	8.15353	5.37905	3.22837	3.00216	4.23743	3.93521	4.20825	5.25795
100.5	5.61261	5.81855	2.3221	2.19035	7.16258	5.61261	3.27174	2.91654	4.00251	4.04849	4.0105	5.20675
100.6	5.00779	5.6678	2.20731	2.33118	6.98278	5.00779	3.13986	3.36258	4.30272	3.60964	4.04233	5.0429
100.7	5.45904	5.6871	2.267	2.25005	7.27939	5.45904	3.05488	3.16436	4.20239	3.77507	4.03997	5.1816
100.8	5.45699	5.9769	2.18352	2.296	7.42469	5.45699	3.02978	2.89922	4.54298	3.95789	3.91989	5.4847
100.9	5.74571	5.9224	2.17019	2.28125	7.45534	5.74571	2.78934	3.21383	4.56729	3.9052	4.21073	5.37355
101	5.66119	5.02805	2.17433	2.22973	6.82284	5.66119	3.00738	2.95884	4.09268	3.77955	4.03797	5.0431
101.1	5.8346	5.45165	2.17836	2.1852	6.92656	5.8346	3.00496	3.07442	3.98642	3.76725	3.85727	4.78169
101.2	5.80589	5.23895	2.24083	2.26709	6.53285	5.80589	2.94264	2.95469	3.80747	3.64248	3.99768	5.2251
101.3	6.46438	5.38895	2.19561	2.33474	6.82658	6.46438	2.82326	2.84558	3.85801	3.91136	4.19645	5.2876
101.4	5.65921	6.4056	2.18095	2.19992	7.88765	5.65921	2.93246	3.07475	4.16964	3.75211	4.2166	5.3998
101.5	6.20465	6.0431	2.21428	2.28687	7.48044	6.20465	2.92726	2.84009	4.09575	3.96023	4.11074	5.44445
101.6	5.19602	5.9429	2.16766	2.25909	7.14094	5.19602	3.12651	3.02146	4.39447	3.77777	4.13905	5.40685
101.7	5.31875	5.74085	2.20844	2.32475	7.21224	5.31875	3.00459	3.00168	4.28616	3.56138	4.19258	5.34275
101.8	5.79204	5.651	2.22754	2.26201	7.17476	5.79204	2.98125	3.18616	4.09323	3.51276	4.19753	5.2939
101.9	5.05272	5.89935	2.1296	2.25651	7.53174	5.05272	3.08729	3.09499	4.21723	3.87406	4.12318	5.0419
102	5.86186	5.9471	2.18764	2.33408	7.56294	5.86186	2.95365	3.06979	4.32906	3.73701	4.10045	4.85492
102.1	5.15914	6.21	2.20934	2.31612	8.13582	5.15914	3.183	3.06529	4.0054	3.67729	3.9903	5.2835
102.2	5.56718	6.3127	2.16935	2.2304	7.87793	5.56718	3.05366	2.83865	4.18768	3.93733	3.97003	5.31685
102.3	5.9442	6.1351	2.18377	2.1987	8.04542	5.9442	2.87408	3.01159	4.05631	4.19796	4.17398	5.4348
102.4	5.79083	5.48155	2.21436	2.32682	7.07287	5.79083	2.79187	2.97788	4.14825	4.05467	4.26232	5.15785
102.5	5.34271	6.02525	2.20369	2.29277	8.27659	5.34271	3.02598	3.02508	4.21704	3.57098	4.14802	4.92599
102.6	4.97817	6.1352	2.27583	2.25281	7.56215	4.97817	3.17399	3.14352	4.04558	3.75834	3.98267	4.55356
102.7	5.17887	6.0086	2.18289	2.27703	7.2406	5.17887	2.86251	3.0075	3.80802	3.77153	4.15074	4.81294
102.8	4.98113	6.35	2.153	2.24198	8.07901	4.98113	2.918	2.93967	4.05499	3.62238	4.19456	5.02265
102.9	5.57995	5.47855	2.17009	2.27529	7.04035	5.57995	2.92677	2.98601	4.30157	3.7208	4.34895	4.88992
103	5.31471	5.9059	2.16875	2.37299	7.67967	5.31471	2.96252	2.9383	4.18439	3.54583	3.77983	5.5407
103.1	5.55757	5.7554	2.18221	2.3005	6.87341	5.55757	2.89722	2.98005	4.01461	3.90691	3.7925	4.93243
103.2	4.56724	5.8048	2.25058	2.25614	7.27938	4.56724	3.08731	3.09086	3.82625	3.6877	4.11424	5.4932
103.3	5.70831	5.38085	2.22152	2.23095	6.52818	5.70831	3.19408	3.36071	3.83935	3.80611	3.97893	5.41845
103.4	4.8897	6.2418	2.16967	2.23902	7.67539	4.8897	2.95796	3.15203	4.19813	3.75574	4.25361	5.4184
103.5	5.60773	5.50715	2.15572	2.28794	6.7076	5.60773	2.80162	3.01389	3.75988	4.08219	3.85561	5.93105
103.6	6.17648	5.5702	2.18126	2.33887	6.77325	6.17648	2.96764	2.91464	3.92223	4.0778	4.13826	5.71505
103.7	5.37043	6.4316	2.19788	2.32224	7.98473	5.37043	3.00178	3.00127	4.00981	3.75406	4.17295	4.95236
103.8	5.41164	6.2495	2.16947	2.35247	7.87965	5.41164	2.92036	2.97227	4.23013	3.80929	4.33163	5.51955
103.9	5.40986	5.52305	2.12725	2.261	6.93378	5.40986	3.0315	3.08356	4.14715	3.86443	4.1677	5.28885
104	5.37681	5.4885	2.18601	2.43307	6.53267	5.37681	2.91866	3.14413	4.29749	3.64449	4.26115	5.69215
104.1	5.00312	6.20455	2.16468	2.2729	7.53	5.00312	3.07294	3.01207	4.0309	3.79156	4.05532	5.21825
104.2	5.28577	5.4593	2.16309	2.32723	6.91115	5.28577	2.94008	3.13132	4.20859	3.92035	3.7984	5.68375
104.3	5.03047	6.0084	2.14059	2.29754	7.74173	5.03047	2.93514	3.11305	4.47117	3.87949	4.53215	5.20625
104.4	5.5341	5.81345	2.16581	2.2824	7.39192	5.5341	3.01496	3.02146	4.40842	3.72113	4.63586	5.85265
104.5	5.55383	5.58805	2.15677	2.33686	7.00157	5.55383	2.79833	3.02457	4.19172	3.71653	4.05436	5.2156
104.6	5.55494	5.803	2.19256	2.18965	7.40388	5.55494	3.13955	3.06719	4.20857	3.85567	4.02133	5.3045
104.7	5.30133	5.8888	2.17244	2.29613	7.48862	5.30133	2.91385	3.01021	4.10316	3.95798	4.12075	5.7593
104.8	5.40027	5.92235	2.14622	2.31521	7.63481	5.40027	3.03187	2.97788	4.10849	3.67604	4.08792	5.6716
104.9	5.44671	5.46695	2.09929	2.30613	7.23178	5.44671	2.83772	2.91424	4.18548	3.64827	3.9552	5.02235
105	5.68091	6.20195	2.15721	2.36865	7.4931	5.68091	3.0655	3.03263	4.19566	3.87136	4.13982	4.90659
105.1	5.63412	5.24295	2.23023	2.27942	6.99368	5.63412	2.9952	3.00206	4.42572	3.90931	4.18865	5.001
105.2	5.16653	5.6408	2.11056	2.3571	7.21401	5.16653	3.14506	3.2161	4.58138	3.51457	4.22582	5.44495
105.3	5.56116	5.53325	2.25483	2.36342	7.20721	5.56116	2.92109	3.27777	4.03556	3.79779	4.26007	5.0546
105.4	5.50085	5.78745	2.21537	2.30972	6.84167	5.50085	3.02118	2.93067	4.1757	3.87434	4.61388	5.14895
105.5	5.8571	6.3504	2.20621	2.25036	8.30608	5.8571	2.9086	3.03579	4.1612	3.86216	4.39409	5.40325
105.6	6.32806	6.0168	2.23159	2.28398	7.94189	6.32806	2.83535	3.05274	4.23107	3.58069	4.36108	5.16705
105.7	5.71089	5.7398	2.13543	2.27813	7.07812	5.71089	3.07197	2.93332	3.98633	3.9622	4.38793	5.4587
105.8	5.7279	5.25	2.18721	2.36185	6.59956	5.7279	2.79819	2.99503	3.91888	3.90597	4.2554	5.3775
105.9	5.65893	5.843	2.15184	2.38523	7.26304	5.65893	2.93574	3.04158	4.14715	3.701	4.46835	5.2011
106	6.21949	5.5963	2.18044	2.30858	7.16875	6.21949	3.00191	3.00539	4.12496	4.31965	4.32235	5.31565
106.1	5.93051	6.46665	2.22454	2.37969	8.61005	5.93051	2.95306	2.89351	4.18399	4.03237	4.56488	5.31715
106.2	5.99425	5.5757	2.22912	2.2854	7.18016	5.99425	3.06254	3.15669	4.26164	4.03824	4.36864	4.72637
106.3	5.74647	5.52665	2.2079	2.27364	6.95885	5.74647	2.8794	2.93829	4.08762	3.9295	3.93552	5.20825
106.4	5.45231	5.8003	2.13038	2.22194	7.70248	5.45231	3.04976	2.81399	4.12768	3.53235	4.20597	4.7785
106.5	5.41071	5.9461	2.21726	2.21975	7.88883	5.41071	3.1029	3.00325	4.34781	4.10454	4.52113	5.3252
106.6	5.60273	6.1536	2.23269	2.37372	7.68453	5.60273	3.01327	3.03102	4.58467	4.08139	4.63757	5.1953
106.7	5.73041	5.95545	2.15598	2.2889	7.9927	5.73041	2.94043	2.93356	4.63164	3.99825	4.6324	4.5707
106.8	6.14555	5.76205	2.06566	2.22284	7.25387	6.14555	3.01018	3.06216	4.40411	3.94561	4.12657	4.75767
106.9	5.53378	5.7502	2.1691	2.21566	7.75209	5.53378	3.11396	3.03657	4.32616	3.90781	3.8117	4.84814
107	5.18414	5.50815	2.27589	2.14093	7.4927	5.18414	3.1946	3.10656	4.26335	3.51209	4.12643	5.2304
107.1	5.45979	5.7999	2.20405	2.30512	7.00361	5.45979	2.86522	3.04441	4.03226	3.75236	3.81836	4.84931
107.2	5.39621	5.59165	2.13617	2.27582	6.89149	5.39621	2.943	3.01446	4.18837	3.71404	3.88386	5.17995
107.3	5.65702	5.4763	2.15765	2.26836	7.14937	5.65702	3.05018	2.96115	4.40074	3.72611	3.94092	5.0328
107.4	5.97192	5.36915	2.17268	2.2259	6.68762	5.97192	3.02818	3.10094	4.0857	3.77161	4.04924	5.2443
107.5	5.42313	5.3167	2.15259	2.24054	7.11662	5.42313	3.04883	3.17104	4.9086	3.60765	4.24205	5.17725
107.6	5.70829	6.1677	2.05621	2.32145	7.6292	5.70829	3.15035	3.10842	4.55577	3.90252	4.07153	5.2369
107.7	5.70826	5.46665	2.13271	2.34591	6.91751	5.70826	3.12443	3.02722	4.30044	3.82803	4.06938	4.57242
107.8	7.23119	5.97365	2.09599	2.32763	7.76376	7.23119	3.17446	3.10059	4.2577	4.06295	4.09678	5.12105
107.9	7.19653	5.4352	2.11772	2.22727	7.04479	7.19653	3.21084	2.94949	3.97575	4.09483	3.86125	5.1518
108	6.31775	5.78035	2.20198	2.32747	7.39375	6.31775	2.95393	3.11473	3.82184	4.29662	4.26851	5.18585
108.1	6.35445	6.2575	2.24994	2.26233	7.68687	6.35445	2.88987	3.0989	4.05813	3.99209	3.99546	5.3919
108.2	6.07418	5.46525	2.15887	2.17036	6.99664	6.07418	3.13779	3.06884	3.90627	3.98716	4.01799	5.335
108.3	6.28306	6.52185	2.22385	2.29558	8.71468	6.28306	2.99216	2.97487	4.12357	3.97811	3.93376	5.53675
108.4	6.01595	5.5051	2.1774	2.26822	7.4295	6.01595	3.0491	2.94911	4.1359	3.82339	4.16072	5.2801
108.5	5.79084	6.3256	2.19075	2.28783	8.25957	5.79084	3.16129	2.99768	3.91156	3.63616	3.90535	5.426
108.6	6.60369	5.70895	2.14143	2.27007	7.47847	6.60369	3.33495	2.95241	4.29617	4.09229	4.00971	5.565
108.7	6.47304	5.72975	2.16517	2.32182	7.41068	6.47304	2.98042	2.95718	4.34738	3.58868	3.88944	5.4105
108.8	5.75113	5.4769	2.15542	2.31734	7.41359	5.75113	2.89283	3.08264	4.22288	3.57597	4.02921	5.39185
108.9	5.94708	6.41075	2.32435	2.25225	7.93304	5.94708	2.95579	2.98936	4.20155	3.93253	3.88226	5.449
109	5.53916	5.72495	2.24161	2.29034	7.03559	5.53916	2.94371	3.08454	4.19285	3.81798	4.05948	5.4694
109.1	6.49641	6.02245	2.25152	2.30131	7.86235	6.49641	3.47285	2.99994	4.24503	4.27984	3.84839	5.6355
109.2	5.81783	6.3813	2.33813	2.1902	7.17089	5.81783	3.04392	3.30985	4.0995	4.03739	3.95612	5.11725
109.3	5.31693	5.72655	2.23202	2.30638	7.17662	5.31693	2.96191	2.98166	4.13365	3.62052	3.86264	5.611
109.4	5.93394	6.33625	2.27249	2.29455	8.04575	5.93394	3.11841	2.91797	4.02576	4.16416	3.83599	5.7251
109.5	6.05828	6.0592	2.2185	2.31832	7.33067	6.05828	3.17729	3.05339	3.96543	4.2973	3.98505	5.33525
109.6	5.62214	5.8558	2.20531	2.26493	7.28544	5.62214	3.09157	3.02577	4.25335	4.02792	4.30173	5.82455
109.7	5.14504	5.3483	2.11555	2.33884	6.65997	5.14504	3.06378	3.06486	4.12535	3.65871	4.08795	5.3649
109.8	5.38966	5.62805	2.15767	2.21338	7.03638	5.38966	2.86301	2.9447	4.1074	3.66504	3.97743	5.28005
109.9	6.24814	5.77205	2.17041	2.28267	7.1707	6.24814	2.97071	2.82806	3.97283	3.79268	4.13184	5.49745
110	5.72729	5.2786	2.0767	2.29867	6.76591	5.72729	3.0046	2.9699	4.34734	4.03817	3.77204	5.4806
110.1	5.35457	5.5989	2.16826	2.23179	7.45456	5.35457	3.10351	3.0754	4.25244	4.0994	3.84627	5.7932
110.2	5.54394	5.6214	2.23572	2.32903	7.27141	5.54394	2.94951	3.118	4.19078	3.77684	4.07249	5.13475
110.3	5.5515	6.11135	2.14108	2.24848	7.65423	5.5515	3.00464	2.98604	4.04282	3.64228	3.9068	5.3709
110.4	5.86045	6.34415	2.2123	2.15402	8.08485	5.86045	2.86838	3.13665	4.26522	3.95919	4.05587	4.7782
110.5	5.93638	5.68655	2.19765	2.2233	7.44383	5.93638	2.97761	3.00992	4.20169	3.71674	4.08334	5.02215
110.6	5.28059	5.98025	2.2545	2.2529	7.51524	5.28059	3.05927	2.89416	4.05497	4.1506	4.1062	4.25927
110.7	5.36829	5.40255	2.16292	2.19751	7.02511	5.36829	2.99993	2.83548	4.13885	3.96652	4.14127	4.10185
110.8	6.11663	5.5669	2.21247	2.29067	7.07916	6.11663	3.00289	3.13949	4.32532	4.11051	4.01626	3.9742
110.9	5.67087	5.62115	2.21817	2.22825	6.82576	5.67087	2.97569	3.05959	4.44081	4.10804	4.06888	4.03872
111	6.17211	5.32365	2.17871	2.20925	6.86447	6.17211	3.16791	2.93364	4.05665	3.89183	4.22278	4.04298
111.1	7.4612	5.115	2.19412	2.11931	7.21804	7.4612	2.93673	3.03164	4.43637	4.09296	4.16635	4.25314
111.2	7.78946	5.96575	2.18623	2.16154	7.81498	7.78946	2.97356	3.05051	4.27624	4.2258	4.27678	3.96192
111.3	7.52492	5.9719	2.25911	2.16571	7.49779	7.52492	2.94089	3.11014	4.11663	3.91674	3.86512	4.46589
111.4	7.75952	5.42035	2.14968	2.29539	7.05654	7.75952	3.10326	3.004	3.92908	4.02869	4.00688	4.07111
111.5	7.7648	5.64795	2.19117	2.37885	7.26417	7.7648	3.18675	2.91009	4.14537	3.64396	4.07459	4.09405
111.6	7.08561	5.85345	2.18146	2.23009	7.7241	7.08561	3.19562	3.00711	4.39855	3.78862	4.01535	4.20161
111.7	7.23247	5.5516	2.24959	2.23952	7.41916	7.23247	2.99459	3.00181	4.4013	3.61279	3.9517	4.21136
111.8	7.96385	5.4199	2.15637	2.26682	6.7995	7.96385	2.92703	3.10542	4.09483	4.22326	4.07259	4.1094
111.9	8.44429	5.41615	2.18191	2.26659	6.97689	8.44429	3.11167	3.02434	3.98181	4.29638	3.95654	4.17532
112	7.83425	5.3014	2.18784	2.28449	6.70803	7.83425	3.10039	2.98837	4.20845	3.85582	3.95043	3.85797
112.1	7.77524	5.6109	2.15899	2.24447	6.81163	7.77524	2.74365	3.16248	4.18492	4.27241	4.0464	4.12997
112.2	7.64766	6.02115	2.20122	2.28712	7.69414	7.64766	3.08496	2.91387	4.20887	3.63254	4.33236	4.11945
112.3	7.73528	6.4009	2.09294	2.22458	8.18913	7.73528	3.07815	2.99492	4.06421	3.91128	4.25567	3.98344
112.4	7.80914	5.76355	2.16017	2.06807	7.08939	7.80914	2.85773	2.80081	4.13467	4.33402	4.46906	4.38962
112.5	7.3799	5.7507	2.15471	2.19277	6.86674	7.3799	3.05848	2.80897	4.15634	4.01117	4.4716	4.83283
112.6	7.84921	5.66305	2.2586	2.31896	7.35559	7.84921	2.94666	2.9945	4.28303	4.20612	4.61866	5.07765
112.7	7.5274	5.9019	2.25671	2.25869	6.94501	7.5274	2.99868	3.16369	3.82924	4.18629	4.3592	5.17125
112.8	7.4146	5.9855	2.28485	2.24235	7.16295	7.4146	2.86477	2.88271	3.95911	4.20615	4.33219	5.04145
112.9	8.8392	6.08135	2.19836	2.18914	7.51581	8.8392	3.13055	2.95775	4.19313	4.47348	4.12051	5.2831
113	7.47316	5.54835	2.08206	2.29673	6.83529	7.47316	3.09999	2.96805	3.67824	4.45341	4.01329	4.7427
113.1	8.00808	5.88075	2.20509	2.22904	7.14135	8.00808	2.90069	2.8417	4.0232	4.40376	3.98897	4.9733
113.2	7.9747	5.8149	2.1347	2.12943	7.53961	7.9747	3.17259	2.94113	4.12716	3.99517	4.02283	4.88578
113.3	7.72666	5.65375	2.18949	2.2563	7.25746	7.72666	2.89929	2.85799	4.26273	4.51713	3.8465	5.4675
113.4	7.25613	5.64085	2.25394	2.24243	8.0103	7.25613	2.82564	3.00304	4.60557	3.81499	3.86001	5.59365
113.5	7.71151	6.2718	2.22569	2.17988	8.61791	7.71151	2.94968	2.98232	4.68963	4.47473	4.10178	5.8089
113.6	7.2218	5.35645	2.14939	2.24106	7.47953	7.2218	3.00809	2.92445	4.4341	4.0533	3.95035	5.61635
113.7	7.7432	5.82435	2.15518	2.25903	7.00051	7.7432	2.83068	3.00626	4.01973	4.32784	3.97552	5.15
113.8	7.44226	5.87215	2.18582	2.18294	7.04824	7.44226	2.79812	2.96879	3.98548	4.41422	4.07475	4.97157
113.9	8.47033	6.40295	2.16466	2.31986	7.81532	8.47033	2.80337	2.92031	3.82656	4.73747	4.14485	5.2254
114	7.74671	6.2716	2.16747	2.12926	7.82196	7.74671	2.92218	2.9043	4.12631	4.23629	4.05575	5.4249
114.1	7.30738	6.18675	2.13377	2.39283	7.8902	7.30738	2.77205	3.17355	4.21727	4.03024	4.17098	5.2147
114.2	7.13741	5.94155	2.18647	2.14398	7.7397	7.13741	2.97164	2.95181	4.24477	4.32269	4.34889	5.3965
114.3	8.42088	5.7845	2.17819	2.21178	7.7314	8.42088	2.98136	3.07212	4.82794	4.5552	4.45388	5.40975
114.4	8.43465	5.98255	2.18748	2.21116	7.47904	8.43465	2.8839	3.13925	4.1528	4.387	4.17883	5.23825
114.5	8.1905	5.54925	2.28308	2.22804	6.79625	8.1905	2.85613	3.0268	3.95129	4.49951	4.29125	4.99252
114.6	8.1685	6.6097	2.23097	2.1105	8.4904	8.1685	3.10861	2.84355	4.29666	4.75849	4.64176	5.6542
114.7	8.04319	5.9584	2.25873	2.10948	8.23269	8.04319	2.94462	3.22555	4.3513	4.42118	4.16077	4.76499
114.8	7.43244	6.1844	2.16416	2.203	8.24218	7.43244	2.84566	2.8997	4.45618	4.08712	3.86987	5.05345
114.9	8.05807	5.90735	2.24981	2.26796	8.28041	8.05807	2.89898	2.88496	4.65088	4.57325	3.92911	4.89656
115	7.99875	5.64095	2.30514	2.20499	7.87127	7.99875	2.92131	2.97202	4.65006	4.43096	4.18782	5.3862
115.1	7.89098	5.40535	2.24593	2.27759	7.30456	7.89098	3.06384	2.99032	4.2944	4.43651	3.95031	5.0068
115.2	8.03624	5.2859	2.1429	2.30789	7.61413	8.03624	2.99744	3.00805	4.74606	4.08216	4.14954	5.2151
115.3	7.17856	5.6266	2.26421	2.29886	7.09262	7.17856	3.06532	3.12276	4.1292	4.54803	4.14453	5.13575
115.4	7.45153	5.51915	2.17598	2.21092	7.59608	7.45153	3.06542	3.01635	4.42112	4.10769	4.06786	5.20095
115.5	7.99123	5.7758	2.21029	2.15933	7.47701	7.99123	2.94915	2.90252	4.42359	4.12843	4.2433	4.9336
115.6	7.2257	5.75945	2.15562	2.1976	7.71763	7.2257	2.94705	3.05619	4.68421	4.07829	3.89185	4.82404
115.7	8.0897	4.93076	2.24323	2.27239	6.02454	8.0897	2.9873	3.05451	3.98142	4.27529	3.81302	4.82066
115.8	7.57485	5.1229	2.15166	2.2167	6.22787	7.57485	3.07875	3.02308	4.03048	4.08595	4.00078	4.52165
115.9	6.56745	5.2924	2.15865	2.2808	6.12721	6.56745	3.30349	3.19467	4.14261	3.52639	4.27205	4.85771
116	6.87423	5.30825	2.19643	2.21943	5.9281	6.87423	3.05973	3.06021	4.1532	4.09214	4.15173	4.3935
116.1	7.84295	5.6184	2.19594	2.2123	6.39421	7.84295	3.16949	3.02897	4.09959	4.09668	4.11631	4.72608
116.2	7.96145	5.5707	2.19616	2.19263	6.46038	7.96145	2.97947	3.07445	4.04519	4.14796	4.15844	4.75478
116.3	7.63567	5.5095	2.10703	2.26151	6.64558	7.63567	3.23597	3.13872	4.0113	4.15958	4.20456	4.68832
116.4	7.27657	5.49265	2.20949	2.2091	6.24302	7.27657	3.08245	2.89724	3.90143	4.33272	4.15686	4.77349
116.5	8.35126	5.4461	2.14261	2.25813	6.72884	8.35126	3.07967	3.11664	4.13349	4.36756	4.13843	4.89762
116.6	7.85651	5.2915	2.18743	2.23835	6.20984	7.85651	3.02897	3.06763	4.29377	4.05687	4.19278	5.43395
116.7	8.45514	5.36385	2.20278	2.19532	6.81782	8.45514	2.88467	3.0993	4.33071	4.29443	3.9993	4.19857
116.8	6.78416	5.9162	2.08258	2.2952	6.7878	6.78416	2.9337	3.16875	3.87366	4.0656	4.2765	5.2326
116.9	8.71195	5.46315	2.20536	2.26743	6.53764	8.71195	3.01358	2.93878	4.18878	4.83343	4.04391	5.22555
117	8.25577	6.1788	2.22702	2.21645	7.59781	8.25577	3.00032	2.96806	4.07703	4.73175	4.25187	4.67812
117.1	8.27249	5.86195	2.17008	2.18323	6.94062	8.27249	2.87926	2.94672	4.08071	4.13314	4.25828	4.99362
117.2	8.37613	6.62595	2.1492	2.35303	8.69439	8.37613	3.0677	3.03883	4.17513	4.61501	4.13592	4.97648
117.3	7.97236	6.873	2.21685	2.15088	8.72148	7.97236	2.8026	2.94812	4.14787	4.44147	4.01074	5.2737
117.4	7.52635	6.79275	2.13239	2.17625	8.37229	7.52635	2.96573	3.04819	4.3528	4.44942	4.34572	5.10615
117.5	8.32427	6.63725	2.20211	2.25903	7.62792	8.32427	2.87349	2.95527	4.45405	4.63331	4.28494	4.65313
117.6	7.15892	6.5052	2.12751	2.21958	7.8345	7.15892	2.95632	2.99322	3.94983	3.90781	4.03691	5.23975
117.7	7.54037	6.88595	2.1317	2.26409	8.51411	7.54037	3.06467	3.12645	3.77687	4.19329	4.44801	5.1786
117.8	7.21621	6.31895	2.14146	2.30453	7.0385	7.21621	2.86547	3.01532	3.7882	3.93987	4.24557	4.93189
117.9	7.43885	6.3168	2.1803	2.27755	7.80722	7.43885	2.9831	3.06907	3.74228	4.20447	4.08036	4.97863
118	8.13881	6.40805	2.18526	2.17897	7.51815	8.13881	2.96675	2.91509	4.01823	4.20111	4.15873	5.18605
118.1	7.93534	6.51465	2.21763	2.18797	8.13335	7.93534	2.94385	3.20177	4.32058	4.60123	4.21339	5.22645
118.2	8.11529	6.2085	2.12282	2.22853	7.22935	8.11529	3.07187	2.94495	4.15764	4.5804	4.12531	5.12955
118.3	8.01618	5.84405	2.08214	2.2429	7.4071	8.01618	2.92978	2.83278	4.45836	4.47059	4.0009	5.2032
118.4	8.16887	6.064	2.21273	2.20184	7.40931	8.16887	3.12676	3.07086	4.44428	4.43532	4.22594	5.2052
118.5	8.05175	6.2846	2.14516	2.20869	7.47051	8.05175	2.87794	3.00654	4.45183	4.77691	4.13064	5.55905
118.6	9.20585	6.13955	2.17002	2.18829	7.65543	9.20585	3.09362	2.8958	4.36623	4.72316	4.11449	5.51535
118.7	8.8582	6.13965	2.14508	2.30675	7.5198	8.8582	2.89092	3.01471	4.29084	4.70902	4.11353	4.77649
118.8	8.19051	6.1526	2.1768	2.15451	7.58709	8.19051	2.77512	3.11801	3.99443	4.73994	4.14041	5.04535
118.9	8.47199	6.06325	2.18404	2.30746	7.19179	8.47199	2.89208	2.91495	4.11337	4.83349	4.04472	5.4051
119	8.4973	6.12645	2.25524	2.2832	7.3464	8.4973	3.01175	2.97356	3.96834	4.3601	4.1843	4.99315
119.1	7.93825	6.79625	2.12234	2.19034	7.94367	7.93825	2.9135	3.11916	3.74659	4.35158	4.32964	5.3936
119.2	7.80935	6.42675	2.21536	2.23576	7.59006	7.80935	2.80668	2.92754	4.00218	4.25781	3.93659	5.3388
119.3	7.88998	6.6287	2.17716	2.17893	8.19293	7.88998	2.81286	2.97993	4.27325	4.41918	4.03095	5.1214
119.4	6.06816	6.22535	2.17104	2.30703	7.51711	6.06816	2.8664	3.0017	4.20218	4.51481	4.14475	5.2647
119.5	6.79063	6.4062	2.16469	2.18996	7.9127	6.79063	3.09821	3.08157	4.4235	4.62102	4.2067	5.10705
119.6	5.83979	6.44405	2.13918	2.28484	8.15626	5.83979	2.94699	2.94644	4.60238	4.35283	4.1109	5.09235
119.7	6.31297	6.65565	2.17184	2.20733	8.38002	6.31297	3.07348	3.08963	4.10691	4.44339	3.98692	5.17165
119.8	5.96014	6.4572	2.2056	2.4131	8.00676	5.96014	3.02303	3.24461	4.40923	4.46894	4.06486	5.80825
119.9	5.83505	6.4052	2.14921	2.3659	7.75723	5.83505	2.83455	3.05225	4.17511	4.26801	4.05468	5.05685
120	6.89303	6.05525	2.20869	2.15273	8.95979	6.89303	2.842	2.9703	3.9113	4.74416	4.03398	5.22925
120.1	6.01077	6.97445	2.20276	2.2756	8.45203	6.01077	2.75746	2.88381	3.78974	4.383	4.10965	5.0628
120.2	6.26169	6.6772	2.15112	2.2032	8.01534	6.26169	2.79556	2.94705	3.82713	4.44717	4.1733	5.06185
120.3	5.2964	6.6699	2.20185	2.31057	8.09849	5.2964	2.97274	2.95145	3.93498	3.83182	4.36153	5.2132
120.4	8.44619	6.9073	2.08834	2.19393	8.56316	8.44619	2.81681	2.86265	4.15239	4.60042	4.19548	5.19805
120.5	8.74717	6.39865	2.28728	2.17232	8.20309	8.74717	2.972	2.80681	4.16284	4.33789	4.14206	5.5837
120.6	8.37354	6.21185	2.28605	2.24203	7.97835	8.37354	2.72433	2.87897	4.09925	4.47053	4.18169	5.0463
120.7	7.77295	6.2166	2.19664	2.30185	7.37255	7.77295	2.93411	2.80673	3.96116	4.2028	4.0864	4.83561
120.8	8.17217	6.39945	2.1795	2.2639	8.54428	8.17217	3.07755	2.87063	4.26469	4.6134	4.2705	4.69874
120.9	7.85046	6.1497	2.18253	2.23034	7.40524	7.85046	3.23582	2.83682	4.03409	4.255	4.26287	5.31015
121	7.88282	6.5267	2.15468	2.23112	7.73881	7.88282	3.0038	2.80302	4.17276	4.25514	4.36908	5.34605
121.1	8.19002	6.6104	2.28254	2.2735	8.72531	8.19002	2.77664	2.88598	4.43731	4.22246	4.20417	5.94895
121.2	7.85647	6.0645	2.18831	2.2654	7.75068	7.85647	2.98637	2.87642	4.21786	4.60512	4.08309	5.939
121.3	8.53502	5.77	2.18905	2.10007	6.83247	8.53502	3.04419	2.84203	3.69888	4.70555	4.2919	5.5631
121.4	8.07657	6.3889	2.2287	2.15861	7.52966	8.07657	3.05072	3.14909	3.7182	4.52813	4.41721	5.5335
121.5	7.94496	5.93145	2.22466	2.22283	7.38696	7.94496	3.03209	2.76527	4.54384	4.05992	4.54584	5.4379
121.6	7.64116	5.93505	2.22021	2.19244	7.6452	7.64116	2.8616	2.96462	4.16513	4.11536	4.1462	5.23225
121.7	6.58849	6.30145	2.23845	2.34316	7.54814	6.58849	2.86037	2.83948	3.9157	4.05542	4.01824	5.12995
121.8	5.59527	6.2529	2.20216	2.22837	7.74135	5.59527	2.87707	2.93393	4.15904	4.32582	4.03059	4.94603
121.9	6.47875	6.0454	2.16554	2.19518	7.61571	6.47875	3.10451	2.9214	4.25402	4.47063	4.20827	5.44615
122	5.07007	6.06825	2.13493	2.29135	7.18909	5.07007	3.14221	3.00908	3.91963	3.90645	4.18868	5.548
122.1	6.15646	6.2858	2.21163	2.15513	8.2026	6.15646	2.85613	2.81283	4.17258	4.6234	4.2218	5.83535
122.2	5.9293	6.02405	2.19771	2.15795	7.07408	5.9293	2.77207	2.86659	4.01878	4.55348	4.31258	5.60395
122.3	5.73944	6.12345	2.17938	2.26606	7.79202	5.73944	3.02287	3.0366	3.90777	4.4868	4.31414	5.2936
122.4	6.85346	5.90555	2.14526	2.31345	7.78906	6.85346	2.85516	3.05858	4.28697	4.69933	4.14402	5.09845
122.5	6.50317	5.9777	2.2555	2.32654	7.79959	6.50317	2.76236	2.95878	4.25795	4.56506	4.13779	5.9364
122.6	6.89536	6.3896	2.25364	2.26395	8.45472	6.89536	2.94629	2.92299	4.41177	4.51372	4.17009	4.93044
122.7	6.70817	6.71845	2.18717	2.23508	8.4382	6.70817	2.86731	2.96245	4.35733	4.61927	4.58486	4.66712
122.8	6.30686	6.62715	2.19309	2.26428	8.19646	6.30686	2.87498	3.13545	3.78895	4.46466	4.23173	4.62808
122.9	6.29415	6.83775	2.19462	2.24602	8.05882	6.29415	3.01071	3.02338	3.88899	4.58488	4.55358	4.86551
123	5.92694	5.74815	2.17632	2.30661	7.05358	5.92694	2.93621	2.95967	4.35679	4.26738	4.52913	5.282
123.1	6.29675	6.0732	2.14906	2.30085	7.36041	6.29675	2.95163	3.32498	4.38068	4.50133	4.52257	5.32575
123.2	6.17277	5.96955	2.15164	2.39444	7.26289	6.17277	2.99787	2.93994	4.4521	4.26778	4.35348	5.15365
123.3	6.53663	6.4833	2.20416	2.08677	7.85352	6.53663	2.90445	3.11643	4.47562	4.81192	4.28352	5.41015
123.4	6.31426	5.7424	2.14483	2.18944	7.17551	6.31426	2.76723	2.97206	4.34433	4.51288	4.11324	5.00525
123.5	6.77163	6.4564	2.18232	2.24248	8.06512	6.77163	3.03862	3.00242	4.16834	4.55849	4.40211	4.89023
123.6	5.9855	6.50115	2.13038	2.17695	7.58601	5.9855	2.83726	3.07023	4.03768	4.54265	4.31068	5.19875
123.7	6.11869	6.28645	2.16342	2.18426	7.67498	6.11869	2.76098	2.8741	3.84549	4.42889	4.18615	5.1048
123.8	6.41367	5.86465	2.30136	2.16161	6.99369	6.41367	2.83765	2.97878	4.08206	4.55645	4.15722	5.56015
123.9	6.76143	5.8741	2.29704	2.29536	6.98768	6.76143	2.8636	2.96726	4.37267	4.25134	3.99194	5.0993
124	6.14792	4.85693	2.20051	2.21083	6.13204	6.14792	3.06794	2.89312	4.43206	4.33996	4.67641	5.35915
124.1	5.7794	4.98501	2.19141	2.28882	6.61946	5.7794	2.74677	2.8369	4.19618	3.71129	4.31188	5.3007
124.2	4.94893	5.064	2.19412	2.17223	6.87592	4.94893	2.90632	2.9655	4.11576	3.95593	4.16677	5.6125
124.3	5.2228	4.62162	2.2176	2.26713	6.26832	5.2228	2.77705	2.92798	4.65259	3.65977	4.14406	5.335
124.4	4.9903	5.5499	2.20722	2.29602	6.71755	4.9903	2.82074	3.01932	4.20336	3.72325	4.20551	5.16245
124.5	5.08591	4.94204	2.15611	2.27462	6.17704	5.08591	2.80829	2.93485	4.01107	3.68329	4.19976	5.50225
124.6	5.50168	5.3374	2.27466	2.29649	6.35226	5.50168	2.95129	3.00406	4.0836	3.71799	4.29833	5.07565
124.7	4.87454	5.88195	2.202	2.30353	7.53641	4.87454	2.76451	2.93524	4.17715	3.58346	4.19611	4.968
124.8	4.94026	5.5105	2.18039	2.28102	7.06037	4.94026	2.97438	2.97377	4.52398	3.77178	4.21753	5.45675
124.9	5.17342	6.194	2.15144	2.30866	8.15741	5.17342	2.84229	3.07702	4.26067	3.72878	4.29377	5.75175
125	4.8911	5.257	2.19446	2.22088	6.66104	4.8911	3.20898	3.02619	4.59543	3.74313	4.45773	5.61885
125.1	5.13075	5.1844	2.19686	2.27296	7.22765	5.13075	2.84499	3.06065	4.77914	3.81697	4.16578	5.33485
125.2	5.31912	5.81825	2.25203	2.24873	7.64644	5.31912	3.14047	3.28227	3.96416	3.82219	4.17828	5.68095
125.3	5.14848	6.352	2.19939	2.29399	8.56871	5.14848	2.93326	3.07822	4.56393	3.71541	4.38425	5.5323
125.4	5.17054	6.19805	2.2799	2.29121	8.37553	5.17054	3.13951	3.28516	4.48453	3.73016	4.35346	6.1383
125.5	4.98223	6.0625	2.27215	2.24085	8.40329	4.98223	2.92577	3.24857	4.54034	3.61168	4.28514	5.66415
125.6	5.3506	5.58145	2.14148	2.27589	7.03256	5.3506	2.94598	3.15497	4.18984	3.68016	4.47912	4.84818
125.7	5.39284	5.11415	2.18827	2.24611	6.6178	5.39284	2.90389	3.16137	4.3807	3.70781	4.24123	4.75598
125.8	5.12182	4.63046	2.22799	2.27229	6.30928	5.12182	2.94458	3.03997	4.14817	3.67413	4.43039	4.91399
125.9	5.34614	5.68715	2.1501	2.28979	7.35959	5.34614	2.8056	3.21477	4.29735	3.75883	4.1274	5.1937
126	4.92915	5.25395	2.19731	2.31283	6.92936	4.92915	2.88774	3.2373	4.05405	3.76229	4.1797	5.404
126.1	5.1141	5.564	2.15957	2.30103	6.61236	5.1141	2.78042	3.03267	4.1883	3.68067	4.2966	4.81411
126.2	5.03874	5.96715	2.19882	2.31925	7.36015	5.03874	2.80219	3.06392	4.14987	3.62462	4.14212	4.70716
126.3	5.452	5.8508	2.16358	2.28266	7.94027	5.452	3.07226	2.81691	4.26106	3.66802	4.25479	4.40964
126.4	4.84859	5.9591	2.2296	2.32625	7.61144	4.84859	2.92068	2.98238	4.2268	3.63797	4.11019	5.91775
126.5	4.97766	5.71475	2.19733	2.19798	6.97491	4.97766	3.0215	2.746	4.3456	3.58006	4.33012	5.30455
126.6	5.12527	5.75605	2.24075	2.20683	6.98118	5.12527	2.98202	3.09762	3.92238	3.6622	4.41437	4.94714
126.7	5.55551	6.216	2.16983	2.30511	7.9512	5.55551	2.87979	2.86778	4.11437	3.85053	4.03676	5.0716
126.8	5.73721	5.8305	2.23122	2.39006	7.20625	5.73721	2.88248	3.15726	4.03937	3.8965	4.06458	5.06455
126.9	5.43462	5.59595	2.28166	2.19264	6.75799	5.43462	2.87572	3.2465	3.99654	3.88472	4.06872	5.1335
127	5.19459	5.9802	2.17575	2.27594	7.24336	5.19459	2.90879	3.05636	4.00847	3.56337	3.93893	4.96805
127.1	4.91601	6.311	2.24883	2.32226	7.9129	4.91601	2.69056	2.97236	4.08022	3.90481	4.06093	4.92315
127.2	5.02546	6.05125	2.24132	2.24103	7.63056	5.02546	2.80043	2.86884	4.23746	3.59667	3.99876	5.2173
127.3	5.11046	6.11525	2.171	2.24363	8.39106	5.11046	2.93411	2.83778	4.59856	3.66289	4.0301	5.01335
127.4	4.87542	5.8026	2.17629	2.30728	8.0367	4.87542	2.89666	3.05204	4.57949	3.66134	4.17746	4.73513
127.5	5.30503	5.52165	2.14284	2.35536	7.05274	5.30503	2.96548	3.06454	4.24174	3.65627	4.16154	5.11835
127.6	5.01917	6.23865	2.14013	2.26539	8.43115	5.01917	2.93468	3.01588	4.47885	3.79136	4.17464	4.87981
127.7	5.42313	5.85575	2.19239	2.23553	7.79632	5.42313	2.81557	2.95797	4.79833	3.9631	4.15638	4.7766
127.8	5.17153	6.0585	2.22261	2.25047	7.73688	5.17153	3.03335	3.08986	3.87158	4.03885	4.16846	5.0871
127.9	5.48583	5.84365	2.15605	2.26055	7.52773	5.48583	2.9998	2.94658	4.19796	3.90213	4.23394	5.40865
128	5.2584	6.65795	2.21916	2.31312	8.55184	5.2584	2.92868	2.93643	3.91306	3.89147	4.22994	4.53188
128.1	5.81492	5.9592	2.20343	2.30525	7.85412	5.81492	3.17503	3.14502	3.96595	3.6591	4.06944	4.15006
128.2	5.66271	6.10755	2.26507	2.27574	7.53161	5.66271	2.99432	3.0494	4.23278	4.12921	4.33197	4.60435
128.3	4.79313	5.5642	2.11327	2.2942	6.69271	4.79313	3.40068	3.27204	3.89763	3.758	4.19293	4.67288
128.4	5.162	6.0905	2.14505	2.20191	7.53575	5.162	2.90804	2.94382	4.06351	3.7942	3.9186	4.25633
128.5	5.22359	5.96755	2.23013	2.32692	7.00552	5.22359	2.91241	2.96299	3.82373	3.66119	4.081	4.7728
128.6	5.28165	5.82455	2.25637	2.16198	6.95153	5.28165	2.90694	2.96766	3.94305	3.89522	4.12894	4.55491
128.7	5.51344	5.4396	2.12059	2.23342	6.87575	5.51344	2.91487	2.86398	4.35298	4.02963	3.89932	4.5907
128.8	5.19743	5.86805	2.15844	2.33091	7.73015	5.19743	2.89835	2.94894	4.35894	3.69039	4.14963	4.98777
128.9	5.68181	5.84375	2.15754	2.35707	7.90352	5.68181	3.00015	2.9991	4.58398	3.9673	4.06871	5.08925
129	5.42164	6.06635	2.12305	2.32975	7.71335	5.42164	3.00572	3.17193	4.16045	3.68611	4.16885	4.50127
129.1	5.55437	6.33055	2.17904	2.2646	8.27444	5.55437	2.96364	3.14751	4.49008	3.74913	4.06366	5.02635
129.2	5.34893	5.5611	2.21073	2.32621	7.37239	5.34893	3.13334	2.95499	4.52616	3.52547	3.94726	4.51968
129.3	5.13584	6.03595	2.26349	2.34531	8.0343	5.13584	2.93483	3.03845	4.39583	3.68945	4.26604	4.9364
129.4	5.40334	5.9723	2.23636	2.28105	7.83092	5.40334	2.81944	3.03533	4.3698	4.06975	4.03033	4.86588
129.5	5.46802	5.5787	2.22168	2.28662	7.57417	5.46802	2.85277	3.08185	4.32792	4.07651	4.18422	4.59619
129.6	5.45474	5.89965	2.22374	2.30244	7.59007	5.45474	3.05096	2.98987	4.29917	3.73237	4.26105	4.95256
129.7	4.91908	5.8758	2.22643	2.20924	7.50293	4.91908	2.88803	3.06164	4.3164	3.81291	4.23052	5.3906
129.8	5.12779	5.9114	2.17836	2.20551	7.20202	5.12779	3.19953	2.87245	3.96809	3.55431	4.13815	5.34885
129.9	5.28726	5.9778	2.15663	2.26563	7.94945	5.28726	2.79096	2.96221	4.32665	3.90851	4.13765	5.37415
130	5.25535	5.5303	2.17299	2.222	6.96272	5.25535	3.0806	2.90885	4.14182	3.74879	4.08301	5.1963
130.1	5.32934	5.54985	2.19266	2.26704	7.11605	5.32934	2.96089	2.82878	4.10526	3.73733	4.31648	5.28935
130.2	5.69617	5.90715	2.24118	2.19231	7.94252	5.69617	2.93785	3.08328	3.9811	3.9924	4.1292	5.2339
130.3	5.13983	5.99125	2.27494	2.17214	7.4347	5.13983	2.98387	3.10376	4.01933	3.77461	4.25006	5.05285
130.4	5.59976	5.5655	2.32824	2.31071	7.52396	5.59976	2.83493	2.86668	4.11359	3.87185	4.33373	4.83183
130.5	5.40792	6.16435	2.28726	2.25542	8.14544	5.40792	3.11526	2.91097	4.38997	3.76337	4.16097	5.3677
130.6	5.07083	6.3302	2.30157	2.2195	8.30039	5.07083	2.92957	3.10941	4.28196	3.57319	4.06823	5.4848
130.7	4.96564	6.64695	2.38796	2.28184	7.87495	4.96564	3.12314	2.90959	4.10275	3.68838	4.06423	5.2659
130.8	4.76327	6.02165	2.40568	2.23058	7.41884	4.76327	3.11088	3.06546	4.23111	3.85205	4.08682	5.58435
130.9	4.91145	5.5765	2.27461	2.28141	6.6694	4.91145	3.2055	3.02797	4.176	3.52882	3.95728	5.6173
131	5.08709	6.51285	2.37498	2.26881	7.62299	5.08709	2.86434	3.04219	3.93084	3.68404	3.66527	5.3453
131.1	4.69071	5.8241	2.25748	2.2917	7.31347	4.69071	3.04056	2.99783	4.04767	3.89078	3.87773	5.62785
131.2	5.24034	6.7992	2.43927	2.29135	8.02529	5.24034	3.47554	3.18559	4.16451	3.85153	3.86276	5.5628
131.3	4.9209	5.9765	2.19781	2.24713	6.59727	4.9209	2.89105	3.09486	4.16685	3.75683	4.49504	5.71445
131.4	5.28958	5.9195	2.17581	2.29001	7.61076	5.28958	2.94977	2.9552	4.11813	3.79005	4.28659	5.33755
131.5	4.91643	5.85705	2.20311	2.21559	6.88333	4.91643	3.02251	3.29798	3.92012	3.83259	4.37006	5.09375
131.6	5.03664	5.7752	2.15456	2.17015	7.39883	5.03664	3.1234	2.99571	4.30934	3.68424	4.5284	5.1004
131.7	5.62853	5.8214	2.21978	2.36084	7.3022	5.62853	2.94805	2.94818	4.03223	3.68045	4.52006	5.2243
131.8	5.21711	6.1016	2.16978	2.23732	7.11111	5.21711	3.01639	3.06248	4.11313	3.68038	4.4524	4.64653
131.9	5.63514	5.79475	2.19785	2.28477	7.47171	5.63514	2.98107	2.95295	4.22672	4.08826	4.00978	5.31395
132	5.68951	5.5701	2.2399	2.27647	6.5711	5.68951	3.12988	2.96532	4.01539	3.91148	4.72685	5.337
132.1	4.56008	6.24635	2.14006	2.32286	7.86465	4.56008	3.09913	3.04116	4.3276	3.75575	4.15832	5.88715
132.2	4.99281	5.8941	2.16614	2.30179	7.50486	4.99281	3.1295	2.99475	4.45196	3.60154	4.08674	5.066
132.3	5.55001	5.6451	2.21134	2.20348	7.12372	5.55001	3.03194	2.92473	4.44793	4.02646	4.18631	5.3743
132.4	5.37493	5.54845	2.17008	2.12909	7.00296	5.37493	2.66179	2.98344	4.64398	3.72509	4.21619	5.10825
132.5	5.45759	5.72345	2.29441	2.33434	7.24971	5.45759	2.99316	2.79897	4.03413	3.81713	4.43175	5.10505
132.6	4.9708	5.52475	2.23894	2.33687	6.7653	4.9708	2.88392	3.32298	4.3305	3.74019	4.46571	5.4237
132.7	4.89129	5.83	2.15233	2.1707	7.20371	4.89129	3.01166	2.99719	4.25607	3.65141	4.374	4.85493
132.8	5.34524	5.69275	2.17069	2.13116	6.91787	5.34524	3.02184	3.14719	4.15076	4.02219	4.36246	5.0733
132.9	5.11597	5.6613	2.15341	2.26817	7.06866	5.11597	2.79451	2.87106	4.04828	4.0381	4.36505	5.1938
133	5.03489	6.095	2.24277	2.25639	7.76541	5.03489	2.86693	2.9516	4.18789	3.63247	4.43588	5.24505
133.1	4.99946	5.5545	2.18429	2.32318	7.27582	4.99946	2.82365	3.06117	4.33155	3.77361	4.21908	5.37685
133.2	4.81893	5.96305	2.20575	2.25712	7.06161	4.81893	2.97681	3.07976	4.26611	3.67131	4.5457	5.28695
133.3	4.86747	5.51655	2.01512	2.30202	6.87109	4.86747	3.09292	3.05961	4.5199	3.78336	3.8527	5.3788
133.4	5.17122	5.66715	2.2159	2.16543	7.00985	5.17122	2.92148	2.88126	4.39006	3.56317	4.14248	5.15425
133.5	4.96475	5.54645	2.10589	2.21075	7.09581	4.96475	2.78088	3.07315	4.64032	3.70341	3.72069	5.39885
133.6	5.005	6.20355	2.02702	2.28677	8.62832	5.005	3.11415	2.98052	4.91022	3.53497	4.19642	5.36635
133.7	5.20682	6.3047	2.08755	2.25766	8.12016	5.20682	2.90034	2.8821	4.2992	3.70085	3.7869	5.07705
133.8	5.21401	5.683	2.38844	2.18086	6.83335	5.21401	2.73669	2.92394	4.18234	3.63598	3.80448	5.18575
133.9	4.8023	5.4426	2.12341	2.36346	6.8142	4.8023	2.93819	3.17884	4.08193	3.63905	3.68345	5.9301
134	5.69871	5.8884	2.07286	2.16392	6.49301	5.69871	3.07479	2.94191	4.21983	4.05757	3.89246	5.34355
134.1	5.16509	5.58365	2.16242	2.29806	6.8267	5.16509	2.90837	3.02147	4.12938	3.65831	3.65705	5.33135
134.2	5.41829	5.46135	2.0912	2.23607	6.3145	5.41829	2.94231	2.91043	4.20263	4.0535	4.02353	5.359
134.3	5.2771	5.4324	2.1273	2.25086	6.2019	5.2771	2.87749	3.11913	4.22366	3.7468	3.85482	5.56395
134.4	5.85445	5.92875	2.14173	2.16349	7.06627	5.85445	2.94035	2.96701	4.22358	4.01656	3.67222	4.85729
134.5	5.5266	6.02045	2.20291	2.28496	7.58787	5.5266	3.06915	2.98586	4.0415	3.6964	3.79264	5.4543
134.6	5.52914	5.77275	2.12005	2.22157	7.43239	5.52914	3.12136	2.83218	4.46861	3.69321	3.82494	5.21575
134.7	5.3015	5.43385	2.09935	2.30355	6.68505	5.3015	3.03533	2.89325	4.54997	3.77889	3.7077	4.97038
134.8	5.17119	5.9821	2.01719	2.24656	7.56663	5.17119	2.96692	3.02617	4.14605	3.73951	3.7405	5.16295
134.9	5.0539	5.7989	2.14688	2.34697	6.8579	5.0539	2.9972	2.96709	3.89916	3.9705	3.59085	5.55895
135	5.28479	6.05175	2.09224	2.26019	7.22293	5.28479	2.70099	3.20675	4.20981	3.79887	3.64284	5.38955
135.1	5.18726	5.59795	2.07952	2.23778	6.89042	5.18726	2.72839	3.11687	4.43252	3.68379	3.59708	5.5313
135.2	5.0971	5.69425	2.04795	2.28559	6.80589	5.0971	2.85774	3.10164	4.28966	3.67958	3.55126	5.593
135.3	5.36855	5.67755	2.12981	2.15776	6.94163	5.36855	3.06225	3.09346	4.3672	3.78642	3.66876	5.6204
135.4	5.09369	5.8984	2.09164	2.26618	8.07794	5.09369	2.95397	2.9327	5.1322	3.51971	3.81265	5.31775
135.5	5.36323	5.789	2.04865	2.37213	7.8894	5.36323	3.01214	3.07218	4.59549	3.67549	3.56626	5.43545
135.6	5.46242	5.97075	2.01456	2.31612	7.66882	5.46242	2.6261	3.14402	4.18963	3.55316	3.56697	5.66395
135.7	5.08188	6.1267	2.07249	2.24709	7.57142	5.08188	3.19029	3.04925	4.09903	3.81941	3.60579	5.39615
135.8	5.12669	5.79255	2.09926	2.19585	7.76377	5.12669	3.00155	2.94009	4.3707	3.77205	3.91063	5.67385
135.9	5.10411	5.9319	2.10324	2.23828	7.49666	5.10411	2.92069	2.95774	4.20198	3.75435	3.67925	5.41205
136	4.97297	6.13695	2.13265	2.33433	8.18801	4.97297	2.82339	2.99451	4.37749	3.54995	3.63874	5.36415
136.1	5.28223	5.63815	2.14167	2.3374	7.24461	5.28223	3.04892	2.89678	4.41394	3.4796	3.66969	4.94843
136.2	5.48325	5.8093	2.0636	2.36813	7.44285	5.48325	2.9413	2.8628	4.35076	3.67382	3.66693	4.8671
136.3	5.55721	5.62895	2.12071	2.27323	6.55698	5.55721	2.95146	2.91454	4.17734	4.00938	3.66948	5.21875
136.4	5.28947	5.7085	2.05053	2.32125	7.28836	5.28947	2.9381	2.99632	4.65409	3.7891	3.67751	5.1023
136.5	5.25152	5.67685	2.11635	2.20879	7.08404	5.25152	2.76333	3.02804	4.24826	3.86029	3.8233	5.2036
136.6	5.20873	5.6986	2.03026	2.31372	7.10091	5.20873	2.82001	3.06698	4.08903	3.92809	3.59123	5.43705
136.7	5.52156	5.6982	2.07562	2.32045	6.79974	5.52156	2.88101	3.28171	4.31033	3.7134	3.63927	5.75075
136.8	5.77153	5.4368	2.14051	2.39047	6.68609	5.77153	2.9949	3.12863	4.22146	3.81807	3.82614	5.01955
136.9	5.67683	5.39535	2.01024	2.29744	6.56495	5.67683	2.98278	3.18058	4.18921	4.00399	3.7358	5.37765
137	5.08985	5.8298	2.11293	2.30296	7.60478	5.08985	2.91731	2.97637	4.39234	3.75834	3.77795	5.11185
137.1	5.56583	5.55395	2.0944	2.2621	7.4073	5.56583	2.93339	2.91902	4.28744	3.65415	3.56591	5.6757
137.2	4.91315	5.5649	2.08148	2.27013	7.08903	4.91315	2.92877	3.00298	4.43649	3.75495	3.67459	5.31115
137.3	6.04676	5.6993	2.03239	2.24435	6.85006	6.04676	2.91138	2.95329	4.09253	4.168	3.66706	5.0809
137.4	6.0164	5.6433	2.17732	2.0726	6.81107	6.0164	2.90558	2.99039	4.20995	3.83993	3.67328	4.64684
137.5	5.6285	5.92475	2.06808	2.16057	7.99998	5.6285	3.0105	2.94264	4.70158	3.70524	3.69798	4.82799
137.6	5.2867	5.75625	2.16064	2.22829	7.33669	5.2867	3.03153	2.90461	4.5701	3.61753	3.61498	4.59037
137.7	5.02338	5.7508	2.09714	2.17302	7.31009	5.02338	2.92866	2.81083	4.31515	3.68375	3.6184	4.42593
137.8	5.36632	5.61485	2.13606	2.2274	7.54153	5.36632	2.85218	2.88205	4.80286	3.73232	3.66634	4.65735
137.9	5.48806	5.73835	2.06961	2.18515	7.09539	5.48806	2.83303	2.86176	4.28753	3.60492	3.68253	4.28032
138	5.79561	5.48695	2.18455	2.2761	6.22117	5.79561	3.05704	2.91107	4.11211	3.83387	3.66981	4.59842
138.1	5.27656	5.4481	2.10203	2.14314	6.41472	5.27656	2.88289	3.08519	4.26879	3.79017	4.00657	5.0648
138.2	5.52356	5.9108	2.08207	2.25247	7.71631	5.52356	2.46237	3.17237	4.36676	3.80971	4.01039	4.61902
138.3	5.20402	5.88195	2.11086	2.31607	7.66973	5.20402	3.12209	2.96515	4.27927	3.63104	3.70805	4.57688
138.4	5.59544	5.53685	2.1125	2.29211	6.72982	5.59544	2.83557	3.01679	3.98624	3.59751	4.15888	4.2469
138.5	5.32264	5.7944	2.1271	2.30884	7.2757	5.32264	3.11888	2.86509	4.42659	3.62283	3.75078	4.4954
138.6	5.24977	5.6424	2.14908	2.24561	7.06304	5.24977	2.97304	2.87668	4.22319	3.42055	3.79027	4.36511
138.7	5.56929	5.9051	2.11718	2.34557	7.77619	5.56929	2.90461	2.73594	4.50579	3.611	3.53714	4.09847
138.8	5.28191	5.6004	2.08162	2.29176	7.22555	5.28191	3.04346	2.77205	4.40587	3.68056	3.71742	4.40759
138.9	5.83803	5.66775	2.06915	2.34841	6.95001	5.83803	2.87302	2.92202	4.2878	3.83732	3.64485	4.91568
139	5.4891	5.75295	2.03907	2.29441	7.81278	5.4891	2.81905	2.96753	4.67837	3.76775	3.56251	4.43555
139.1	5.31576	5.877	2.05225	2.30862	7.29258	5.31576	2.90622	3.00135	4.12511	3.57492	3.66161	4.58136
139.2	5.07009	5.4551	2.15746	2.24093	6.92741	5.07009	2.92413	3.03297	4.55451	3.7971	3.67661	4.50863
139.3	5.48911	5.88495	2.09393	2.31398	7.82514	5.48911	2.80245	2.94755	4.39375	3.95502	3.64504	4.5313
139.4	5.36693	5.7022	2.06239	2.28657	7.38017	5.36693	2.91296	3.08655	4.39403	3.66927	3.65292	4.24024
139.5	5.88239	5.9991	2.17372	2.20212	7.43903	5.88239	2.94532	3.17411	4.38907	3.91236	3.61843	5.29065
139.6	5.08624	5.7094	2.10605	2.27731	7.84032	5.08624	3.04392	3.0425	4.66143	3.79694	3.77616	4.64473
139.7	5.36192	5.85095	2.11471	2.32379	7.26375	5.36192	3.15293	3.0332	4.25192	3.71462	3.86125	4.96307
139.8	5.53576	5.64495	2.02288	2.29916	7.50052	5.53576	2.89471	2.93449	4.29634	3.72395	3.65329	5.0837
139.9	5.13065	5.69565	2.03645	2.24241	7.082	5.13065	2.84157	2.93454	4.03428	3.70795	3.64473	5.29565
140	5.42004	5.8818	2.11195	2.38055	7.65823	5.42004	3.02806	3.03227	4.16559	3.75908	3.66388	5.3966
140.1	5.51987	5.99585	2.081	2.2938	7.22029	5.51987	3.035	3.00098	4.098	3.9046	3.60652	5.0837
140.2	5.76534	6.70025	2.03915	2.33877	8.32915	5.76534	2.92109	3.1026	4.59238	3.65186	3.69419	5.55175
140.3	5.29063	6.15025	2.12358	2.30347	7.55064	5.29063	3.03577	2.9915	4.23632	3.60982	3.75525	5.2193
140.4	5.36462	6.89715	2.07848	2.21313	9.57845	5.36462	2.73259	2.94068	5.0535	3.59455	3.57896	5.0761
140.5	5.17349	6.75495	2.12983	2.21044	8.56081	5.17349	2.89981	3.06697	4.16917	3.72214	3.62352	5.41735
140.6	5.39133	6.5144	2.09161	2.27107	8.51243	5.39133	3.105	2.98342	4.4946	3.74204	3.80508	4.86867
140.7	5.78977	6.4437	2.06719	2.30281	7.77642	5.78977	2.83243	2.78429	4.20819	4.03821	3.73904	4.98958
140.8	5.57973	6.65195	2.09635	2.36455	8.17433	5.57973	3.05761	2.81121	4.2151	3.64129	3.64383	4.92873
140.9	5.38029	6.2395	2.05637	2.32091	8.39302	5.38029	2.94525	2.82617	4.72361	3.63522	3.8713	5.09345
141	5.47595	6.0546	2.02345	2.32924	7.39056	5.47595	2.9901	3.036	4.22403	3.72523	3.77291	5.2264
141.1	5.16888	6.6742	2.13565	2.31721	8.46252	5.16888	2.94722	2.92524	4.00375	3.68318	3.82054	4.71013
141.2	5.65409	6.30845	2.1055	2.33575	8.0229	5.65409	2.76482	2.85201	4.16238	3.78743	3.64938	4.55495
141.3	5.37269	6.3511	2.1349	2.29899	7.67415	5.37269	3.03457	3.01437	4.03986	3.68518	3.91069	4.79687
141.4	5.11146	6.4392	2.10074	2.22498	7.73831	5.11146	2.9587	2.9208	3.9462	3.91228	4.57421	4.73349
141.5	5.51056	6.50525	2.07985	2.37706	7.64046	5.51056	3.03168	2.99771	4.03168	3.69038	4.53223	4.88453
141.6	5.30477	6.5763	2.08035	2.26817	7.95681	5.30477	2.60575	2.83073	4.30176	3.4938	3.97006	4.45211
141.7	5.23711	6.4015	2.04634	2.32567	7.98918	5.23711	2.91391	2.9128	4.26768	3.72056	4.03546	4.47386
141.8	5.51415	6.89695	2.18051	2.35674	8.68978	5.51415	2.5935	2.97802	4.02352	3.7322	4.25286	4.52391
141.9	4.94399	6.04345	2.06341	2.2838	8.71373	4.94399	2.79996	3.02538	4.22541	3.83318	4.36516	4.79608
142	5.49428	6.98115	2.06086	2.22783	8.72555	5.49428	2.57465	3.04591	4.06811	3.69009	4.38636	4.78052
142.1	5.09267	6.4714	2.00383	2.31872	8.47117	5.09267	2.79356	3.07008	4.12505	3.67957	4.60722	4.70552
142.2	5.59826	5.4806	2.04818	2.25154	7.48313	5.59826	2.88177	2.83052	4.66329	3.90708	4.4637	4.50849
142.3	5.45626	6.0978	2.18223	2.33352	7.2923	5.45626	2.7709	3.0991	4.21013	3.71561	4.92352	4.84881
142.4	5.36128	6.64985	2.04614	2.30309	7.34172	5.36128	2.7021	2.89945	4.03079	3.48881	4.92399	5.14635
142.5	5.10751	6.87395	2.02359	2.39417	8.08135	5.10751	2.72493	2.92798	4.42453	3.49643	4.53968	4.84645
142.6	5.3766	6.5233	2.22655	2.34297	7.87258	5.3766	2.7904	3.00334	4.24709	3.59551	4.45792	5.19435
142.7	5.51805	6.61585	2.16798	2.24743	7.52712	5.51805	3.0635	3.02117	3.79836	3.70573	4.60109	5.3144
142.8	5.08727	6.73685	2.07171	2.23277	8.04402	5.08727	2.79404	3.06591	3.78421	3.85263	4.10972	5.41645
142.9	5.42004	6.1576	2.21582	2.28451	7.95352	5.42004	2.77854	3.00327	4.55335	3.6389	4.24197	5.16295
143	5.27327	6.90405	1.98999	2.31461	8.72368	5.27327	2.69327	2.896	4.58744	3.51737	4.28323	5.0513
143.1	5.48358	6.80365	2.0014	2.36762	7.93145	5.48358	2.80831	2.99916	4.5723	3.46297	4.18241	4.76976
143.2	5.93482	6.4241	2.09009	2.27251	8.14376	5.93482	2.78575	3.00492	4.20758	3.68513	3.90334	4.45739
143.3	5.51823	6.47485	2.08298	2.26532	8.02873	5.51823	2.80386	3.01807	4.25655	3.48963	4.5322	4.38581
143.4	5.54192	6.58825	1.98402	2.26693	7.80309	5.54192	2.86464	2.93977	4.23236	3.60391	4.53414	4.42246
143.5	5.76483	6.42035	2.01781	2.27542	7.21517	5.76483	2.73276	3.05425	3.91399	3.61867	4.71738	4.38268
143.6	4.96989	6.41575	2.11469	2.27424	7.35994	4.96989	2.99749	2.84074	4.2144	3.58336	4.80036	4.73197
143.7	5.85285	5.4817	2.10659	2.31813	6.79488	5.85285	2.83229	3.02838	4.55434	3.64015	5.05618	4.65938
143.8	5.17092	5.5804	2.02554	2.29797	6.72016	5.17092	2.81795	3.06335	3.9725	3.68734	4.02056	4.29284
143.9	5.44574	5.82025	2.05004	2.20728	7.10189	5.44574	2.80256	2.88361	4.33425	3.50271	4.75122	4.56636
144	5.35288	5.6083	2.10259	2.23388	6.6913	5.35288	3.00038	2.93356	4.17934	3.6172	4.95105	4.46151
144.1	5.55875	5.83885	2.00236	2.2422	7.28042	5.55875	3.00389	2.92633	4.06003	3.64107	4.92309	4.31393
144.2	4.9675	5.55925	2.06149	2.24077	6.33925	4.9675	2.88381	3.15939	3.85069	3.61772	4.5273	5.00105
144.3	5.84234	5.7052	2.06107	2.29111	7.31234	5.84234	2.80758	2.93513	4.43501	3.88289	4.62374	5.1672
144.4	5.26696	5.8326	2.07879	2.2663	7.76112	5.26696	2.89371	2.87366	4.54529	3.539	4.77539	5.5443
144.5	5.06276	5.34185	2.10628	2.2408	6.74661	5.06276	2.91239	3.00041	4.13199	3.60713	4.95945	5.2793
144.6	5.35896	5.51555	2.01526	2.24893	7.74697	5.35896	2.83224	3.11769	4.88561	3.66093	4.77741	5.46125
144.7	5.38223	5.2064	2.10044	2.28138	7.29877	5.38223	2.88616	3.1696	4.41725	3.71769	4.79779	5.7634
144.8	4.78899	5.3907	2.0556	2.33027	7.22556	4.78899	2.89723	2.92139	4.38645	3.64691	5.07937	5.67405
144.9	5.07537	5.3925	2.09952	2.27935	7.07554	5.07537	3.08008	3.07854	4.17331	3.6338	4.47507	5.2506
145	4.93914	5.62125	2.1335	2.23052	7.10928	4.93914	2.84383	3.05163	4.14956	3.77176	4.16804	5.71375
145.1	5.65496	5.564	2.1591	2.34955	7.28569	5.65496	2.91716	3.08447	4.44068	3.75685	4.48525	5.21145
145.2	5.10909	5.64825	2.09173	2.25954	7.52787	5.10909	2.87277	2.93456	4.89961	3.70606	4.55223	5.20035
145.3	5.18716	5.46275	2.07304	2.18045	7.11722	5.18716	2.783	3.0281	4.33117	3.60026	4.7125	5.2918
145.4	5.51999	5.39335	2.13971	2.24624	7.40972	5.51999	2.79049	3.13474	4.68558	3.60761	4.38927	5.51245
145.5	5.47621	5.579	2.13034	2.2305	7.81926	5.47621	3.16441	2.92527	4.80098	3.89073	4.79866	5.5863
145.6	5.4073	5.49565	2.12312	2.13419	7.42558	5.4073	2.96279	3.07045	4.07653	3.84475	4.51746	5.45155
145.7	5.5174	5.8579	2.06764	2.26948	7.47339	5.5174	3.13687	2.90306	4.39192	3.99043	5.15165	5.6774
145.8	4.89897	5.6053	2.03332	2.27171	6.44918	4.89897	2.94531	3.15171	4.13528	3.61895	4.77375	5.6533
145.9	5.35954	5.77865	2.16222	2.1922	7.61484	5.35954	2.96664	2.90243	4.27703	4.04688	4.30721	5.4412
146	5.14942	5.5947	2.18208	2.18963	7.52994	5.14942	2.84845	2.89594	4.3769	3.67067	4.13303	5.35975
146.1	5.08723	5.65935	2.09574	2.24761	7.6645	5.08723	2.94544	3.07199	4.58605	3.7277	4.55684	5.67725
146.2	5.14479	5.67535	1.9342	2.2462	7.36031	5.14479	3.05798	2.92837	4.47617	3.71341	4.80303	5.4081
146.3	5.2626	5.78475	2.07286	2.32703	7.85107	5.2626	3.10858	2.86418	4.54443	3.84781	4.94088	5.243
146.4	5.37408	5.671	2.15727	2.14598	7.11397	5.37408	2.94365	2.89658	4.64672	3.55098	4.60231	5.3706
146.5	5.44599	5.46025	2.0939	2.2302	7.5129	5.44599	2.81875	3.00694	4.57615	3.48879	4.22471	5.0936
146.6	5.08032	6.08875	2.38375	2.35658	7.64944	5.08032	2.925	2.95167	4.13341	3.58744	4.02684	5.23465
146.7	5.22167	5.71165	2.1883	2.18873	7.44048	5.22167	2.9796	2.85848	4.52653	3.54378	3.87656	5.29135
146.8	5.70924	6.11655	2.17988	2.32587	7.64766	5.70924	3.14901	3.0465	4.02262	3.61839	3.95355	5.30655
146.9	5.34202	5.7302	2.11283	2.28793	7.63996	5.34202	3.01387	3.07337	4.4379	3.59525	3.83965	4.59549
147	5.06477	5.9123	2.19013	2.29022	7.85191	5.06477	3.11165	3.01199	4.27349	3.58597	3.81137	4.80716
147.1	4.90519	5.75285	2.20593	2.34896	7.6387	4.90519	3.04833	3.02054	4.08523	3.51822	4.27286	4.9135
147.2	5.16547	5.853	2.16965	2.40205	7.96758	5.16547	3.16164	3.00382	4.60198	3.36767	3.96646	4.93337
147.3	5.94252	5.8554	2.18605	2.29114	7.3563	5.94252	3.02123	3.2082	4.1426	3.74236	4.64583	5.01375
147.4	5.19355	5.84355	2.239	2.32869	7.42391	5.19355	3.00869	3.21676	4.49787	3.54963	4.05803	5.0563
147.5	5.48803	5.9536	2.27552	2.22274	7.53329	5.48803	2.79618	3.15681	4.26925	3.6979	3.87752	5.283
147.6	5.90245	5.9098	2.20315	2.30059	7.42391	5.90245	3.1969	3.22744	4.39889	3.69774	4.31963	5.214
147.7	4.94469	6.01495	2.22415	2.18208	8.19154	4.94469	2.95573	2.94029	4.55889	3.58826	4.23691	5.0148
147.8	5.42682	5.81805	2.26719	2.36535	7.1398	5.42682	2.92035	2.94254	4.26551	3.54759	4.24793	5.2876
147.9	5.46218	5.70445	2.22126	2.19685	7.21587	5.46218	3.13788	2.94056	4.89293	3.70544	4.69106	4.827
148	5.39627	5.66895	2.21588	2.36795	7.89267	5.39627	2.84455	3.05767	4.81667	3.74329	3.96414	4.86381
148.1	5.38077	5.62545	2.19039	2.23456	7.58125	5.38077	3.24802	2.82273	5.0619	3.74429	4.13685	4.77874
148.2	5.41327	5.69195	2.28006	2.29258	7.60668	5.41327	2.82028	2.98336	4.23719	3.66016	4.0939	4.96385
148.3	5.499	5.71255	2.28788	2.32457	7.67136	5.499	2.97536	2.89193	4.22366	3.84526	4.31093	4.73583
148.4	5.31291	5.63845	2.18829	2.36152	7.44672	5.31291	2.97507	2.82055	4.24927	3.83085	4.29178	4.87549
148.5	5.86208	5.8477	2.18125	2.23825	7.58728	5.86208	3.10176	2.97296	4.63037	3.86565	3.7717	5.0915
148.6	5.94142	5.8793	2.15384	2.32094	7.59901	5.94142	3.08273	3.08492	4.67127	3.86072	4.05164	4.86902
148.7	5.22646	5.93105	2.26903	2.22047	7.35372	5.22646	3.06772	3.01207	3.96804	3.48866	4.20244	5.53875
148.8	5.28418	5.89265	2.23084	2.35726	7.93918	5.28418	2.97946	3.13313	4.49667	3.5791	4.0287	5.07515
148.9	5.59922	6.11405	2.18823	2.28689	7.83863	5.59922	3.0319	2.95327	4.22042	3.6119	4.32219	4.78369
149	5.61777	5.82445	2.21869	2.33048	7.9126	5.61777	2.84559	2.96073	4.51234	3.90005	3.65564	4.86061
149.1	5.06017	5.88685	2.22547	2.26533	7.64419	5.06017	2.99293	2.98616	4.35938	3.62458	3.63558	5.1229
149.2	5.25533	6.2236	2.13963	2.30164	8.86546	5.25533	2.92118	3.22012	4.83882	3.69608	3.60648	5.3545
149.3	5.24787	6.1355	2.23162	2.2097	8.10686	5.24787	2.97363	2.89452	4.1543	3.39928	3.8791	5.15165
149.4	5.62036	6.04445	2.21118	2.43602	8.04655	5.62036	2.95423	3.02052	4.03087	3.66328	3.58151	5.033
149.5	5.27229	5.87925	2.22824	2.36637	8.09311	5.27229	2.95316	3.00228	4.19707	3.67869	3.57975	5.46035
149.6	5.06886	5.96855	2.19879	2.26784	7.70807	5.06886	2.92062	2.9672	4.1328	3.6198	3.57388	5.3598
149.7	5.4322	5.93295	2.16918	2.22734	7.94273	5.4322	2.76017	2.9245	4.53932	3.669	3.66471	4.92641
149.8	5.40268	5.73165	2.18853	2.36501	7.39347	5.40268	3.13495	2.75211	4.26258	3.53319	3.63795	5.27865
149.9	5.32933	5.8348	2.19706	2.24777	7.04689	5.32933	2.96759	2.99447	3.82727	3.86936	3.51762	5.39525
150	5.32892	5.8901	2.25254	2.24912	7.45552	5.32892	2.97779	2.82489	4.04073	3.61438	3.53635	5.346
150.1	5.40439	5.8352	2.23271	2.21394	7.35857	5.40439	2.92876	3.09707	4.19609	3.88155	3.66901	5.45345
150.2	5.01729	6.2289	2.07222	2.35996	8.81939	5.01729	2.75557	3.21107	4.28482	3.74306	3.5851	5.64045
150.3	5.03066	5.88705	2.19542	2.31851	7.49637	5.03066	2.91124	3.05183	4.34131	3.75564	3.70622	5.1887
150.4	5.50365	5.68255	2.15023	2.24295	7.91599	5.50365	2.98554	3.03191	4.47946	3.82495	3.8975	5.33745
150.5	5.17301	5.6787	2.11002	2.18251	7.93196	5.17301	2.98114	2.91235	4.39919	3.49263	3.97875	5.72345
150.6	5.27404	5.9295	2.04556	2.41662	7.36733	5.27404	3.08898	2.75557	4.47395	3.51078	4.28266	4.88197
150.7	5.25535	6.46315	2.13834	2.27305	8.40042	5.25535	2.84547	2.88393	4.22927	3.55741	4.01288	5.1173
150.8	5.31232	6.00875	2.09032	2.37095	7.74303	5.31232	3.2542	2.89716	4.44977	3.88306	4.23824	5.22595
150.9	5.21394	5.6245	2.17393	2.26315	7.54144	5.21394	2.99294	3.04725	4.73285	3.81745	4.2172	5.391
151	5.36812	5.36915	2.10697	2.28335	5.92647	5.36812	3.08418	2.97239	3.99233	3.70446	4.32099	5.2223
151.1	4.72738	5.8433	2.08477	2.22613	7.93865	4.72738	2.98542	2.83978	4.458	3.81458	4.2026	5.3684
151.2	4.97495	5.5976	2.11201	2.32896	7.90243	4.97495	2.96519	2.91804	4.45876	3.66233	4.03072	5.3447
151.3	5.09488	5.5022	2.14635	2.29919	7.95178	5.09488	3.10159	2.87343	4.62247	3.82071	4.46596	5.4072
151.4	4.96491	5.6259	2.29769	2.32449	7.86583	4.96491	2.91143	2.87128	4.13964	3.78023	4.19286	5.56905
151.5	5.28139	5.4188	2.09866	2.25707	7.88401	5.28139	2.92773	2.70954	4.4295	3.77459	3.63681	4.96766
151.6	5.45345	5.36505	2.04901	2.28026	7.90639	5.45345	3.03239	2.98692	4.12028	4.06161	4.01749	4.98388
151.7	5.24744	5.03675	2.02069	2.2127	7.67787	5.24744	3.19334	2.8426	4.55204	4.08383	4.10614	5.2776
151.8	5.10733	5.66495	2.11069	2.30832	8.11349	5.10733	3.2204	2.99106	4.15384	3.73125	3.54426	5.2593
151.9	5.21774	5.34	2.0511	2.23665	7.77665	5.21774	3.06201	2.99055	4.14034	3.75847	3.80331	4.98231
152	4.88989	5.76655	1.95685	2.29425	8.47076	4.88989	2.99659	2.93806	4.39076	3.66331	4.24974	5.4745
152.1	6.11637	5.4912	2.05998	2.25728	8.23407	6.11637	3.09124	2.95086	4.43314	3.76365	4.04105	5.44715
152.2	5.50976	5.5602	2.03683	2.27104	8.15622	5.50976	3.03781	3.11759	4.46835	3.7218	4.28231	5.28205
152.3	5.39792	5.6919	2.07212	2.2796	8.66141	5.39792	3.2197	2.86056	4.59472	3.83596	4.38309	5.25315
152.4	5.33657	5.17835	2.05109	2.34088	7.74541	5.33657	3.20578	3.12507	4.50699	3.61112	4.1773	5.40125
152.5	5.36369	5.35745	2.11329	2.24038	7.95706	5.36369	2.99258	3.08899	4.49966	3.84107	4.25263	5.27585
152.6	5.66854	5.4434	2.14978	2.20573	8.20774	5.66854	2.94534	2.90141	4.3053	3.70713	3.8652	5.1496
152.7	5.20667	5.5773	2.08402	2.27055	8.1903	5.20667	2.94402	3.09885	4.35248	3.71498	3.69794	5.28465
152.8	5.37723	4.98869	2.14645	2.27611	8.16166	5.37723	3.02292	2.98003	4.43893	3.91473	3.66708	5.28965
152.9	5.60482	5.1165	2.1378	2.33447	8.18823	5.60482	2.87858	3.02515	4.81327	3.76157	3.63921	5.64995
153	5.89869	5.4663	2.06568	2.34733	8.31393	5.89869	3.09902	3.15476	4.46669	3.63038	3.7224	5.1473
153.1	5.31297	5.62395	2.09522	2.31602	8.30368	5.31297	2.92104	2.91489	4.09125	3.55234	3.59981	5.1497
153.2	5.54352	5.5932	2.15445	2.25578	7.78908	5.54352	2.93424	3.01654	4.15988	3.67286	3.61464	5.20975
153.3	5.54307	5.68065	2.13891	2.27671	7.93691	5.54307	2.99092	3.13828	4.01391	3.71166	3.70576	5.3649
153.4	5.61327	5.73005	2.13667	2.3132	8.78357	5.61327	2.93234	2.85773	4.51067	3.91517	3.62366	5.06035
153.5	5.53913	5.49825	2.08426	2.29855	8.83355	5.53913	3.21169	3.05952	4.66434	3.67515	3.54424	5.35415
153.6	5.50335	5.78375	2.1065	2.28789	8.62256	5.50335	2.85785	2.76791	4.38342	3.65103	3.66386	5.00695
153.7	5.14119	5.2828	2.08265	2.34341	7.69163	5.14119	3.00669	3.25104	4.26398	3.7107	3.90316	5.94755
153.8	5.42324	5.64325	2.06766	2.3542	8.41044	5.42324	2.99672	2.83642	4.49545	3.69874	3.67292	5.1652
153.9	6.00096	5.59845	2.09164	2.30922	8.17479	6.00096	3.14988	3.09804	4.19771	3.90815	3.60693	5.07175
154	5.9535	5.0508	2.13707	2.26843	7.72401	5.9535	3.07676	2.86743	4.51638	3.71887	3.71953	5.5716
154.1	5.68637	5.55535	2.05937	2.27082	8.15464	5.68637	3.15198	2.90843	4.3824	3.73745	3.73522	5.0329
154.2	6.08699	5.83125	2.11485	2.384	9.52327	6.08699	3.01843	3.17809	5.39835	3.79616	3.63196	5.20365
154.3	5.99803	4.92328	2.07364	2.29968	7.98799	5.99803	2.94086	2.89907	4.97259	4.09481	4.04322	5.5636
154.4	5.95036	5.6942	2.12807	2.42022	8.95247	5.95036	2.96739	3.05522	5.16375	3.44749	3.96	5.23645
154.5	6.09359	5.5034	1.99101	2.29801	8.86947	6.09359	3.09922	3.16351	4.90804	3.93183	3.83524	5.17545
154.6	5.92162	5.46605	2.03219	2.37652	7.95923	5.92162	3.14799	3.18294	4.74905	3.56772	4.46573	5.38445
154.7	5.82974	5.89695	2.12252	2.24916	8.48129	5.82974	3.04907	3.13816	4.60515	3.62263	4.33566	5.15925
154.8	5.51668	6.0506	2.27564	2.29586	9.22458	5.51668	2.98322	2.97003	4.8144	3.50304	3.69315	5.5071
154.9	5.62122	5.3489	2.1362	2.25607	8.29426	5.62122	2.88389	2.98781	4.51328	3.87905	3.69073	5.4858
155	5.79956	5.01215	2.02343	2.2491	7.96328	5.79956	2.98599	3.03412	4.52204	3.81053	3.69868	5.414
155.1	5.56445	5.81785	2.14912	2.25784	9.42854	5.56445	2.86804	3.09482	4.53141	3.73706	3.6635	5.76575
155.2	5.40099	5.81695	2.13558	2.26511	8.74852	5.40099	3.00007	3.16776	4.09755	3.62467	3.77882	5.5765
155.3	5.55081	6.0588	2.08889	2.32065	9.00568	5.55081	2.92134	3.11889	4.40275	3.42145	3.6564	5.1189
155.4	5.70704	5.90945	2.02886	2.36408	8.66033	5.70704	2.96998	3.16214	4.34241	3.71527	3.75379	4.97213
155.5	5.76439	6.0548	1.9929	2.31733	8.75099	5.76439	2.79825	3.15807	4.27495	3.72679	3.5628	5.13435
155.6	5.5147	6.0404	2.01711	2.41988	8.60676	5.5147	3.08421	3.15851	4.05292	3.53518	3.65955	5.17105
155.7	5.58101	6.0736	2.04704	2.24367	8.70848	5.58101	3.13705	3.0525	4.28139	3.5274	3.48183	5.1141
155.8	5.72073	6.00725	2.15096	2.25213	8.75183	5.72073	3.03523	3.16933	4.00363	3.6041	3.7512	5.2895
155.9	5.93261	6.20605	1.99507	2.34788	9.1803	5.93261	2.8941	3.01021	4.39852	4.04899	3.65455	5.4434
156	6.08688	5.97185	2.09163	2.28804	8.94465	6.08688	2.87313	3.03371	4.50649	3.68885	3.62769	5.3321
156.1	5.72285	6.1021	2.05697	2.35022	8.56935	5.72285	2.95723	3.21357	4.28411	3.57273	3.60523	5.7124
156.2	5.69258	5.56905	2.13634	2.29399	8.37987	5.69258	3.15365	3.05593	4.44904	3.66845	3.70799	5.3461
156.3	5.72814	5.7691	1.95901	2.18338	8.29311	5.72814	3.08694	2.91459	3.9929	3.73419	3.60428	5.3174
156.4	5.91842	5.8284	2.05486	2.18431	8.39823	5.91842	3.11508	3.11064	4.09743	3.67212	3.77466	5.69165
156.5	6.11746	5.61195	2.07319	2.31546	8.46302	6.11746	3.15299	2.95294	4.26546	3.99235	4.01976	5.6397
156.6	6.42931	5.56545	2.05462	2.22607	8.16932	6.42931	3.04913	3.10727	4.17918	4.02178	3.65452	5.2352
156.7	5.67243	5.99825	2.02093	2.23896	8.80906	5.67243	2.98079	3.29925	4.43805	3.78769	3.9642	5.20425
156.8	5.86104	5.07615	2.1179	2.39471	7.73428	5.86104	3.04059	3.18145	4.56918	4.00229	4.33014	5.2521
156.9	5.97653	5.24645	2.09516	2.16968	7.80976	5.97653	3.07588	2.8224	4.89579	3.79334	4.52401	5.29335
157	6.03571	5.53955	2.08826	2.31838	7.60658	6.03571	3.06155	2.9514	4.56353	4.28007	4.50137	5.76405
157.1	5.75968	5.24255	2.09496	2.2582	7.47434	5.75968	2.88033	3.02885	4.30556	3.99894	4.27331	5.7952
157.2	6.12376	4.81538	2.12014	2.29205	7.92941	6.12376	3.00615	2.98853	4.46202	3.76601	4.18157	5.046
157.3	5.82395	5.05545	2.13387	2.28455	8.11501	5.82395	2.96521	2.95734	4.52975	3.72124	4.30589	4.73829
157.4	5.81219	4.99393	2.18493	2.41885	8.24955	5.81219	3.08654	2.97182	4.51608	3.66109	4.14015	5.07965
157.5	5.89532	5.03475	2.1313	2.31855	8.43602	5.89532	2.77392	3.11162	4.69128	3.89597	3.91172	4.91882
157.6	5.85335	4.95721	2.1444	2.25587	8.46119	5.85335	2.86598	2.99513	4.56926	3.89401	4.35668	5.2643
157.7	5.73242	5.0119	2.10024	2.30472	8.54885	5.73242	2.93715	3.01898	4.58758	3.71513	4.19458	5.32525
157.8	5.72906	4.90055	2.13507	2.25955	8.62876	5.72906	3.29976	3.05742	4.67639	3.69854	4.45484	5.1179
157.9	6.19172	4.78996	2.02846	2.27425	8.50501	6.19172	3.08699	3.12901	4.71608	3.83015	3.89502	5.43725
158	5.99141	5.5174	2.07304	2.29945	8.91451	5.99141	2.9067	3.25169	4.63293	3.94319	3.80853	5.41845
158.1	5.88579	5.5465	2.10555	2.28078	8.64452	5.88579	2.93657	3.08334	4.1631	3.8111	3.68629	5.24755
158.2	5.62568	5.73945	2.07475	2.35533	9.2274	5.62568	3.02784	2.7909	4.47139	3.61704	3.63796	5.1156
158.3	5.58946	5.54515	2.07823	2.31815	9.20669	5.58946	3.01758	3.09205	4.83207	3.6753	3.59489	5.0282
158.4	5.56876	6.0403	2.21184	2.43569	9.13695	5.56876	3.00888	2.85406	4.20432	3.71754	3.67235	5.23665
158.5	5.81137	5.17385	2.13095	2.19442	8.87029	5.81137	2.84766	3.04166	4.60432	4.11437	3.55357	5.7892
158.6	5.57538	5.51085	2.1536	2.30978	8.36943	5.57538	2.73567	2.93197	3.99484	3.96171	3.65942	5.2902
158.7	5.46187	5.034	2.22671	2.37203	8.45166	5.46187	2.77329	3.01857	4.06245	3.92658	3.67821	5.2129
158.8	6.2692	5.4858	2.1668	2.36862	8.39316	6.2692	3.04454	3.12344	4.06531	3.76742	3.6028	4.98754
158.9	5.53329	5.4013	2.22798	2.30567	8.48971	5.53329	2.74535	2.89647	3.9274	3.62957	3.56546	5.1604
159	5.51806	6.07195	2.29202	2.22241	8.8101	5.51806	2.97417	2.89882	3.87779	3.61555	3.77523	4.90545
159.1	5.86779	5.9563	2.25473	2.23958	9.03908	5.86779	2.99586	3.08944	4.23716	3.69935	3.59136	5.25795
159.2	5.30473	5.5069	2.19651	2.25395	8.34766	5.30473	3.01164	3.0951	4.27285	3.76846	3.96839	5.20675
159.3	5.53636	5.87185	2.11404	2.27536	8.67191	5.53636	2.77149	3.17964	4.32653	3.75258	3.52258	5.0429
159.4	5.5693	5.7833	2.17101	2.23325	8.81583	5.5693	2.75496	2.91308	4.30898	3.8057	3.54806	5.1816
159.5	5.36597	5.88965	2.17291	2.3162	8.52647	5.36597	3.05111	3.02834	4.08057	3.73104	3.6207	5.4847
159.6	5.54796	5.79255	2.17594	2.23907	8.61449	5.54796	2.82953	2.97453	4.1586	3.57742	3.6194	5.37355
159.7	5.7955	5.97115	2.23149	2.30172	9.33733	5.7955	2.85942	3.16534	4.51578	3.94491	3.54423	5.0431
159.8	6.21719	5.33925	2.18248	2.2837	8.30297	6.21719	2.92474	2.91017	4.35701	3.97719	3.63179	4.78169
159.9	5.82077	5.5282	2.16429	2.21536	8.42487	5.82077	3.06193	3.2027	4.07834	3.64281	3.68578	5.2251
160	6.07224	5.79175	2.20951	2.28986	8.60736	6.07224	2.90755	3.11826	4.17165	3.67484	3.624	5.2876
160.1	5.96283	5.662	2.1952	2.3425	9.03226	5.96283	2.78674	2.98094	4.50473	3.55917	3.66478	5.3998
160.2	5.34598	5.6432	2.15303	2.30206	8.72718	5.34598	3.00647	3.0937	4.40182	3.54114	3.65957	5.44445
160.3	5.66411	5.8531	2.24463	2.26532	9.4181	5.66411	3.09468	3.02473	5.0834	3.74039	3.71817	5.40685
160.4	5.61762	5.9672	2.23897	2.36362	9.59938	5.61762	2.96989	3.12496	4.89285	3.61723	3.55386	5.34275
160.5	5.51218	5.84385	2.1969	2.27083	9.01783	5.51218	3.11253	2.8787	4.86111	3.58911	3.63067	5.2939
160.6	5.20728	6.01405	2.19197	2.30557	8.85487	5.20728	3.02903	3.00449	4.31384	3.69937	3.68038	5.0419
160.7	5.86059	5.63625	2.13868	2.3212	8.6979	5.86059	2.89814	2.85948	4.32703	3.67909	3.61016	4.85492
160.8	5.4517	6.0922	2.13445	2.33766	9.01624	5.4517	2.93492	3.03894	4.32977	3.67862	3.53773	5.2835
160.9	5.58669	5.77825	2.12928	2.38047	8.97696	5.58669	2.77468	3.07179	4.56883	3.63138	3.60777	5.31685
161	5.8131	6.1765	2.18407	2.32534	9.22119	5.8131	3.06542	2.81039	4.1488	3.78641	3.57678	5.4348
161.1	6.12779	5.62125	2.16848	2.37283	8.30964	6.12779	2.82262	3.087	4.1715	4.06517	3.7489	5.15785
161.2	6.29301	5.88745	2.33963	2.42448	9.43561	6.29301	2.89423	3.01997	4.56889	3.86023	3.59145	4.92599
161.3	5.91381	6.22115	2.28563	2.2916	9.82033	5.91381	2.93411	3.01331	4.84927	4.02271	3.61209	4.55356
161.4	6.0374	5.7251	2.22842	2.33229	8.48075	6.0374	2.86274	2.86159	4.36007	4.0327	3.648	4.81294
161.5	5.82879	5.6051	2.15107	2.30242	8.53794	5.82879	2.91968	3.01222	4.56301	4.1102	3.55818	5.02265
161.6	5.41171	5.77655	2.08989	2.34455	8.83944	5.41171	3.08906	2.95885	4.32137	3.53337	3.57888	4.88992
161.7	5.31285	5.78705	2.18721	2.37377	8.27184	5.31285	2.88564	3.31073	4.28929	3.69121	3.64033	5.5407
161.8	6.06327	6.04255	2.25724	2.21877	8.04704	6.06327	2.89633	3.03242	3.77534	4.12697	3.5968	4.93243
161.9	6.11463	6.16375	2.26114	2.28013	8.1674	6.11463	2.92129	3.00791	4.10471	3.59155	3.65537	5.4932
162	5.92683	6.1358	2.3269	2.27944	8.0991	5.92683	2.97165	3.06894	4.00207	3.95894	3.56231	5.41845
162.1	5.36629	5.83575	2.18785	2.33184	8.076	5.36629	2.99825	3.26471	4.07547	3.703	3.50847	5.4184
162.2	5.34333	5.57065	2.29455	2.3629	7.76725	5.34333	2.7783	3.08603	4.01849	3.68512	3.51132	5.93105
162.3	5.48413	5.89395	2.21074	2.46348	7.98642	5.48413	2.68475	3.2259	4.11455	3.55315	3.61941	5.71505
162.4	6.27137	6.10865	2.15622	2.33684	7.59039	6.27137	2.96446	2.93545	4.20993	3.54828	3.65347	4.95236
162.5	5.6914	5.77285	2.13582	2.26756	7.97231	5.6914	2.98353	3.2197	4.18096	3.73625	3.66323	5.51955
162.6	5.50817	5.39845	2.22406	2.31776	7.38227	5.50817	2.90806	3.1478	4.20033	3.50053	3.77214	5.28885
162.7	5.31508	5.63705	2.1949	2.26408	6.97278	5.31508	2.91352	3.29565	4.25092	3.82515	3.74282	5.69215
162.8	5.74037	5.9119	2.20513	2.27776	8.17624	5.74037	3.02126	3.19189	4.37419	3.78446	3.6029	5.21825
162.9	5.61228	5.97875	2.21795	2.26628	8.02423	5.61228	2.97838	2.80709	4.15222	3.58175	3.4719	5.68375
163	5.61316	5.9869	2.22706	2.37066	7.51994	5.61316	2.82588	3.15917	4.21685	3.73712	3.47183	5.20625
163.1	5.36889	6.23685	2.22299	2.33391	7.81785	5.36889	2.89114	2.98407	4.33896	3.71733	3.65794	5.85265
163.2	5.9921	5.62625	2.17477	2.25855	7.95664	5.9921	3.03589	3.1663	4.21523	3.93284	3.58543	5.2156
163.3	5.69799	5.81435	2.37451	2.28614	7.8914	5.69799	3.02546	2.93995	4.22941	3.70613	3.64863	5.3045
163.4	5.62172	6.0451	2.20693	2.21743	7.49958	5.62172	2.91466	2.97845	4.30498	3.69516	3.66194	5.7593
163.5	5.97491	5.9138	2.16435	2.26964	7.99367	5.97491	2.98695	3.20087	4.12097	3.78505	3.59726	5.6716
163.6	5.96668	5.98285	2.33575	2.3095	8.20347	5.96668	2.95077	3.035	4.4802	3.79142	3.60962	5.02235
163.7	6.43489	5.6112	2.29196	2.35703	7.92423	6.43489	2.84767	3.1677	4.51695	4.28559	3.59014	4.90659
163.8	5.82722	5.93145	2.24605	2.32407	8.35114	5.82722	2.82936	3.24421	4.51473	3.74257	3.60015	5.001
163.9	5.75241	5.863	2.11408	2.31524	8.74271	5.75241	3.12318	3.14848	4.49047	3.94044	3.54649	5.44495
164	5.63877	5.7249	2.17544	2.36456	7.9075	5.63877	2.89294	2.93287	3.75588	3.70714	3.55509	5.0546
164.1	5.8395	5.8626	2.2048	2.30539	8.44201	5.8395	2.87892	3.06801	4.06094	3.67399	3.66331	5.14895
164.2	5.94475	5.85645	2.17335	2.28901	8.26047	5.94475	2.96252	3.06255	4.18133	3.85237	3.5977	5.40325
164.3	5.55901	6.19305	2.31654	2.28648	8.51376	5.55901	2.91052	2.98136	4.23295	3.61645	3.57098	5.16705
164.4	5.78083	5.9038	2.14217	2.32884	7.8323	5.78083	3.04316	3.18554	4.17115	4.04234	3.67003	5.4587
164.5	6.11827	5.67965	2.24839	2.28576	8.05716	6.11827	2.92358	3.01745	4.28864	4.26201	3.62392	5.3775
164.6	5.53416	5.7016	2.18581	2.37736	8.54678	5.53416	2.94556	3.10223	4.6204	3.78137	3.65836	5.2011
164.7	5.97657	5.9555	2.14365	2.29127	8.94633	5.97657	3.12717	3.00505	4.75672	3.77655	3.63541	5.31565
164.8	5.65015	5.7798	2.23921	2.2477	8.42006	5.65015	2.91988	3.16561	4.39518	3.84495	3.48635	5.31715
164.9	5.65868	6.2715	2.19992	2.38365	8.26332	5.65868	3.00826	2.90304	4.15548	3.68127	3.70538	4.72637
165	5.37479	5.95665	2.12692	2.37344	8.20731	5.37479	2.90058	3.06192	4.11913	3.66362	3.58579	5.20825
165.1	5.59679	6.15855	2.20485	2.34733	8.51388	5.59679	2.9432	3.23324	3.99852	3.43227	3.66896	4.7785
165.2	5.62207	5.8667	2.0558	2.35409	8.14636	5.62207	3.01431	3.11698	4.18917	3.95499	3.6729	5.3252
165.3	6.01461	5.5083	2.25591	2.28929	7.74978	6.01461	2.62229	3.12269	3.80166	3.91444	3.61803	5.1953
165.4	5.50641	5.9994	2.21605	2.29732	8.3796	5.50641	2.85698	3.05294	4.17535	3.49588	3.64128	4.5707
165.5	5.36494	6.2724	2.22831	2.35188	8.53083	5.36494	2.80112	2.95147	4.19738	3.6378	3.55185	4.75767
165.6	6.12901	5.8368	2.1769	2.35427	8.12823	6.12901	3.01193	2.99696	4.16868	3.91901	3.73211	4.84814
165.7	5.70079	6.0259	2.30503	2.2729	8.04706	5.70079	2.98817	3.08778	3.91242	3.70526	3.66303	5.2304
165.8	5.92138	5.8166	2.18554	2.37313	7.81764	5.92138	2.73128	2.93376	4.26199	3.89929	3.5305	4.84931
165.9	5.39789	5.76065	2.25944	2.33406	7.36244	5.39789	2.85703	2.92909	4.09311	3.57795	3.63107	5.17995
166	5.60739	5.72585	2.1433	2.23222	7.25766	5.60739	2.95596	3.08419	3.77178	3.81567	3.57219	5.0328
166.1	6.10429	6.1907	2.19338	2.40006	7.9847	6.10429	2.92437	3.00923	4.02091	4.03221	3.8304	5.2443
166.2	5.44581	6.0023	2.16078	2.25963	8.12518	5.44581	3.05727	3.13652	4.32685	3.58291	3.66068	5.17725
166.3	5.39229	6.04625	2.12444	2.41826	7.87209	5.39229	2.97809	3.05584	3.95784	3.70587	3.61139	5.2369
166.4	5.43178	5.85605	2.26388	2.30817	8.36356	5.43178	3.08698	3.18839	4.19727	3.60063	3.54887	4.57242
166.5	5.38185	6.03935	2.0667	2.37737	8.54732	5.38185	2.98231	3.10503	4.17209	3.41353	3.69115	5.12105
166.6	5.33605	5.9699	2.12364	2.2783	8.17538	5.33605	2.94414	3.20809	4.29576	3.66864	3.63306	5.1518
166.7	5.71901	5.84685	2.17512	2.35477	7.90745	5.71901	2.96378	3.01307	4.11761	3.78688	3.72384	5.18585
166.8	5.27891	5.9993	2.21127	2.34511	8.57804	5.27891	3.0459	3.08261	4.60622	3.57524	3.58304	5.3919
166.9	5.40723	5.95585	2.29169	2.36723	8.52157	5.40723	2.90309	2.97384	4.0717	3.40765	3.61027	5.335
167	5.6179	5.67025	2.198	2.35053	8.13058	5.6179	2.96161	3.16936	4.40764	3.7575	3.76329	5.53675
167.1	5.26924	5.5387	2.15461	2.37724	8.31442	5.26924	2.82663	2.89326	4.46365	3.5689	3.77203	5.2801
167.2	5.66592	5.8601	2.18715	2.38593	8.25689	5.66592	3.02594	3.18124	4.32622	3.79596	3.6183	5.426
167.3	5.31395	5.5406	2.1148	2.26653	8.26539	5.31395	3.0071	2.94887	4.08127	3.70669	3.51023	5.565
167.4	5.56792	5.6468	2.2037	2.29976	8.24283	5.56792	3.10598	3.14949	4.13514	3.60179	3.58366	5.4105
167.5	5.36305	5.5366	2.24523	2.30151	8.03355	5.36305	3.14489	3.04784	4.25171	3.54709	3.66755	5.39185
167.6	5.38274	5.5085	2.07512	2.28187	7.77243	5.38274	3.01383	2.96447	3.92258	3.67516	3.50464	5.449
167.7	5.46662	5.48555	2.17488	2.31146	7.82568	5.46662	3.12033	3.05023	4.17814	3.59381	3.65096	5.4694
167.8	5.33981	5.78415	2.22065	2.38721	7.92936	5.33981	3.06628	3.12093	4.24568	3.63253	3.70685	5.6355
167.9	5.79767	5.994	2.38666	2.29855	8.32001	5.79767	2.90354	3.09524	4.56698	3.47675	3.49067	5.11725
168	5.68295	5.3555	2.2487	2.24475	7.81951	5.68295	3.00618	3.21793	4.35948	3.61579	3.56368	5.611
168.1	5.34729	5.73055	2.22221	2.25609	8.30434	5.34729	3.04682	2.99077	4.53104	3.76279	3.5776	5.7251
168.2	5.54763	6.06685	2.25971	2.24798	7.83026	5.54763	2.90183	3.16982	4.1878	3.72463	3.55138	5.33525
168.3	5.26854	4.94673	2.20167	2.22847	8.03632	5.26854	2.92217	3.0569	4.89163	3.34746	3.90339	5.82455
168.4	5.68565	4.89111	2.25163	2.1927	8.23597	5.68565	2.95471	3.02123	4.66615	3.71059	3.73596	5.3649
168.5	5.67664	4.98158	2.18248	2.31124	7.56821	5.67664	2.73653	3.04944	4.08678	3.80815	3.71466	5.28005
168.6	5.71227	4.78869	2.21035	2.3358	7.4699	5.71227	2.93361	3.31319	4.4242	3.71557	3.56018	5.49745
168.7	5.80319	4.95911	2.09641	2.36769	7.6247	5.80319	2.59902	3.05299	4.60769	3.44645	3.41428	5.4806
168.8	5.6486	5.14425	2.11055	2.26912	7.61981	5.6486	2.91814	3.0429	4.11001	3.77066	3.66177	5.7932
168.9	5.49277	4.7591	2.10361	2.26644	7.39789	5.49277	3.11264	3.04879	4.34877	4.06163	4.2515	5.13475
169	5.78245	5.2058	1.99128	2.32924	7.96338	5.78245	3.02348	3.26541	4.27839	3.70633	3.62613	5.3709
169.1	5.41653	5.1396	2.15902	2.38098	7.59906	5.41653	2.96177	3.00758	4.30668	3.2603	3.55663	4.7782
169.2	5.93696	5.20875	2.10694	2.39178	7.77289	5.93696	2.96781	2.95241	4.20723	3.65855	3.50669	5.02215
169.3	5.83046	5.31385	2.0364	2.36557	8.44242	5.83046	2.98074	2.98436	4.48411	3.63991	3.72002	5.05926
169.4	5.6209	5.24415	2.16566	2.27408	7.76227	5.6209	3.00013	3.06184	3.97294	3.74607	3.49546	5.10185
169.5	5.83655	5.0972	2.07728	2.28094	8.7112	5.83655	2.80327	3.02477	4.70454	3.65308	3.58716	4.97421
169.6	5.88758	5.18755	2.14915	2.31828	7.88173	5.88758	3.06298	2.98617	4.31573	3.81709	3.50662	5.03872
169.7	5.6798	5.29815	2.35995	2.39104	7.46126	5.6798	2.96547	2.88497	4.08556	3.743	3.65014	5.04298
169.8	5.58052	5.4156	2.06683	2.30177	7.43558	5.58052	2.90119	3.10047	3.9929	3.62898	3.61761	4.65313
169.9	5.6055	5.2628	2.08123	2.36305	8.22498	5.6055	3.14012	3.1932	4.36688	3.63605	3.67415	4.96192
170	5.48439	5.40335	2.15857	2.28246	7.53536	5.48439	3.01194	2.99545	4.06556	4.0087	3.58639	5.16589
170.1	5.75981	5.21285	2.16604	2.21051	7.93741	5.75981	2.98381	2.86823	4.22221	3.66038	3.65817	4.77111
170.2	5.77581	5.3631	1.98876	2.36198	7.86063	5.77581	2.99274	3.06987	4.46521	3.43038	3.61141	4.79405
170.3	5.73811	5.3229	2.30171	2.33832	7.7167	5.73811	2.92512	3.07797	3.94636	3.72255	3.79949	4.90161
170.4	5.78615	5.2409	2.14913	2.28442	8.59299	5.78615	2.87757	3.06599	4.50931	3.70601	3.97979	4.91136
170.5	5.23973	5.0403	2.0543	2.38738	8.0556	5.23973	2.87127	3.02984	4.26018	3.47332	3.94013	4.8094
170.6	5.22738	5.38505	2.23596	2.31175	7.75798	5.22738	2.67319	3.05131	3.97514	3.55203	3.81662	4.87532
170.7	5.62407	5.3935	2.05595	2.31671	8.12122	5.62407	3.06232	3.22307	4.1365	3.65984	3.55432	4.55797
170.8	5.69653	5.307	2.03917	2.31277	7.8664	5.69653	2.83926	3.17013	4.23925	3.57809	3.67457	4.82997
170.9	5.8895	5.1717	1.96394	2.41441	7.34968	5.8895	3.1294	2.91685	4.12298	3.55681	3.65598	4.81945
171	5.66896	5.4133	2.00242	2.30065	7.77851	5.66896	3.1671	2.83629	3.83734	3.82164	3.68519	4.68344
171.1	5.55321	5.22935	2.07838	2.27936	8.03886	5.55321	2.88457	3.16946	4.19538	3.96919	3.68083	5.08962
171.2	6.04238	5.139	2.11897	2.27399	6.78507	6.04238	3.18809	2.98595	3.4666	3.79614	3.69001	4.94146
171.3	5.77888	5.18885	2.11046	2.40331	7.82584	5.77888	2.87113	3.18081	3.94829	3.69766	3.6993	5.08781
171.4	5.62413	5.21425	1.91723	2.30448	7.71497	5.62413	2.87543	3.0235	3.94798	3.86101	3.76295	4.75002
171.5	4.98123	5.2682	2.12141	2.20756	7.94198	4.98123	2.77881	3.10601	4.07592	3.79199	3.54803	4.92225
171.6	5.75106	5.0442	2.08995	2.26106	8.16282	5.75106	2.95284	2.97849	4.53327	3.68756	3.49357	4.91434
171.7	5.43615	5.45915	1.99839	2.34863	7.80377	5.43615	3.02971	3.02745	4.02974	3.61594	3.63504	4.91052
171.8	6.01896	5.3816	2.09285	2.26154	7.7508	6.01896	2.80711	2.93052	4.39876	3.81066	3.61938	4.71398
171.9	5.64921	5.11395	2.09783	2.38487	7.62022	5.64921	2.78375	3.2375	4.3102	4.03922	3.73005	4.8773
172	5.50029	5.4144	2.03152	2.39543	7.67421	5.50029	2.88567	3.24557	3.94729	3.65564	3.58013	4.73459
172.1	5.52884	5.33665	1.92606	2.28848	8.26473	5.52884	2.79574	3.04675	4.46825	3.94697	3.56305	4.85244
172.2	5.44069	5.4431	2.14642	2.25703	7.87305	5.44069	3.00648	3.16507	4.02449	3.67203	3.66102	4.63208
172.3	5.70177	5.2538	1.99978	2.3587	7.86655	5.70177	2.80176	3.16281	4.1279	3.77121	3.63864	4.82062
172.4	5.37239	5.28825	2.14526	2.27926	7.75168	5.37239	2.94118	3.05129	4.01184	3.58192	3.8073	4.59257
172.5	5.29854	5.46915	2.03956	2.37523	8.30246	5.29854	2.92179	3.28552	4.40597	3.74191	3.54644	4.82924
172.6	5.4076	5.3174	1.99794	2.31306	7.73675	5.4076	2.4981	3.13961	4.17417	3.5806	3.49967	4.77494
172.7	5.56416	5.28975	2.23441	2.2838	7.52125	5.56416	2.73339	2.81326	4.01673	3.81179	3.58207	4.83599
172.8	5.49352	5.34575	2.04582	2.32945	7.95168	5.49352	2.65742	2.84841	4.28782	3.98941	3.75284	4.75497
172.9	5.45866	5.3418	2.07537	2.2235	7.92485	5.45866	3.11424	2.95112	4.40398	3.97255	3.78959	4.71387
173	5.17302	5.42295	1.95982	2.26234	7.91256	5.17302	2.95373	3.05556	4.19826	3.69769	3.73249	4.71737
173.1	5.14961	5.09665	2.29195	2.26399	7.6795	5.14961	2.85907	2.92421	4.30879	3.75854	3.69495	4.75313
173.2	6.19656	5.1822	2.30106	2.30906	7.77508	6.19656	2.96277	2.77211	4.13718	3.67227	3.84612	4.51089
173.3	5.4078	5.2279	2.08942	2.2702	7.97985	5.4078	2.89631	3.00771	4.07557	3.73816	3.60165	4.71183
173.4	5.3004	5.48045	2.14714	2.24105	8.4099	5.3004	2.94493	2.83959	4.21322	3.5856	3.68463	4.67415
173.5	5.6307	4.83662	2.02659	2.26829	7.55809	5.6307	3.00254	3.19621	4.20275	3.69851	3.71064	4.63243
173.6	5.61731	4.94027	2.28077	2.30387	7.98295	5.61731	2.62539	3.1001	4.1407	3.54915	3.47148	4.74468
173.7	5.68766	4.74761	2.04878	2.2955	7.01253	5.68766	2.81062	3.05347	3.64095	3.71391	3.95626	4.69374
173.8	5.55664	5.02145	2.02637	2.24191	7.80363	5.55664	2.40443	3.21832	3.84977	3.83073	3.25755	4.80009
173.9	5.81222	4.82182	2.05148	2.291	7.12911	5.81222	2.57107	3.01764	3.7805	3.74029	3.60061	4.70047
174	5.58633	5.04925	2.10572	2.2752	7.74665	5.58633	2.50757	3.1704	3.96212	3.64229	3.65954	4.57378
174.1	5.69961	4.74219	2.1886	2.24587	7.69871	5.69961	2.35202	3.04379	4.053	3.66675	3.548	4.7593
174.2	5.86026	4.9596	2.16914	2.25156	7.83082	5.86026	2.71776	3.03105	4.41878	3.5147	3.60416	4.46882
174.3	5.83186	4.85166	2.09642	2.21199	8.11316	5.83186	2.91308	2.89623	4.39712	3.57335	3.75911	4.74363
174.4	5.4277	4.98557	2.04576	2.32445	7.67292	5.4277	2.76351	3.07731	4.22798	3.76173	3.66971	4.86578
174.5	5.60454	4.85632	2.16608	2.26944	7.49325	5.60454	2.60718	2.98039	4.20885	3.86727	3.67216	4.58437
174.6	5.36812	4.95457	2.11002	2.32335	8.10581	5.36812	2.51904	3.26067	4.40798	3.4163	3.63582	4.5183
174.7	5.63999	4.93954	2.14062	2.33157	7.38335	5.63999	3.00694	3.17455	4.17066	3.48188	3.90625	4.59801
174.8	4.81125	4.98104	2.06024	2.35746	7.42869	4.81125	2.91061	3.01283	4.17796	3.70283	3.97833	4.6705
174.9	5.79733	4.92686	2.20497	2.37781	8.18153	5.79733	3.06087	2.93511	4.62362	3.99489	3.67447	4.75474
175	5.64462	5.3785	2.22681	2.37837	8.01032	5.64462	2.74355	3.0312	4.13119	3.67042	3.76971	4.71599
175.1	5.37716	5.2065	2.13187	2.27729	8.22537	5.37716	2.86586	3.11671	4.124	3.98214	3.6106	4.93553
175.2	5.26671	5.39955	2.20684	2.20601	8.36068	5.26671	2.8082	3.06469	4.38155	3.90412	3.66306	5.12101
175.3	6.3985	5.39065	2.03342	2.36903	8.03614	6.3985	2.83202	2.98366	4.23238	3.96199	3.68856	4.85609
175.4	4.96061	5.19025	2.13334	2.24379	8.27567	4.96061	3.00317	3.11778	4.23308	3.75148	3.77839	4.74808
175.5	5.53146	5.1329	2.17056	2.27737	7.71226	5.53146	2.65043	3.15404	3.97389	3.75373	3.7299	4.8911
175.6	5.20765	4.96718	2.19939	2.27567	8.31158	5.20765	2.3329	3.0633	4.40001	3.67732	3.575	4.84563
175.7	5.53258	5.025	2.0785	2.28048	8.32131	5.53258	2.49984	3.10344	4.06463	4.06813	3.69192	4.71071
175.8	5.62594	4.91932	2.2025	2.23983	7.95289	5.62594	2.55675	3.09965	3.9627	4.24047	3.45642	4.94144
175.9	5.26065	4.85599	2.09462	2.26493	8.4863	5.26065	2.70579	3.10263	4.30769	3.89087	3.61982	4.91775
176	5.18796	4.7747	2.12371	2.33424	7.96997	5.18796	2.59416	3.10792	4.09209	3.80589	3.49826	4.95272
176.1	5.2835	4.9843	2.06344	2.25522	8.34299	5.2835	2.78288	3.01894	4.39271	3.65872	3.64324	4.67568
176.2	5.23515	5.121	2.03484	2.26661	8.20516	5.23515	2.49904	3.09486	4.14698	3.70271	3.55742	4.62879
176.3	5.40936	5.26845	2.05209	2.3106	8.64494	5.40936	2.82926	3.01241	4.29509	3.87844	3.63485	4.97288
176.4	5.34821	5.17125	1.96975	2.32511	8.16803	5.34821	2.75746	2.96751	4.08383	3.81498	3.55186	4.91019
176.5	5.78555	5.0206	2.22145	2.15696	8.06805	5.78555	2.5729	3.25807	4.17835	3.94622	3.49565	5.23759
176.6	5.58579	4.81973	2.04515	2.31246	8.27019	5.58579	3.00979	2.98454	4.40695	3.99914	3.79547	4.58732
176.7	5.71157	4.92779	1.99931	2.36607	8.09564	5.71157	2.64839	3.14675	4.27076	3.81324	3.72214	4.93235
176.8	5.72515	5.0387	2.12177	2.2351	8.10645	5.72515	2.64211	2.96829	3.96048	3.65872	3.56342	4.75078
176.9	5.31426	5.0874	2.17851	2.3416	8.50325	5.31426	2.86204	3.19651	4.31236	3.77835	3.63874	4.71355
177	6.25453	5.29535	2.06224	2.36015	8.86327	6.25453	2.82854	3.19873	4.70223	3.66379	3.60129	4.96687
177.1	5.85613	4.62366	2.18739	2.3019	7.54817	5.85613	2.4612	3.068	3.90396	3.64813	3.60583	4.67533
177.2	5.3659	4.86365	2.20858	2.23463	8.41146	5.3659	3.0051	2.96035	4.49615	3.53268	3.73578	4.68445
177.3	6.12232	4.86435	2.17227	2.23108	8.4451	6.12232	2.82314	2.88689	4.45701	3.85659	3.64331	4.59953
177.4	5.77184	4.99477	2.16064	2.31022	8.51086	5.77184	2.73651	2.87883	4.40687	3.86095	3.59548	4.60606
177.5	5.75443	4.98447	2.08345	2.30066	8.3796	5.75443	2.98014	2.95868	4.45021	3.58796	3.77987	4.67338
177.6	5.66756	5.00905	2.24452	2.2936	8.48812	5.66756	2.58989	3.36903	4.28163	3.53761	3.62104	4.7596
177.7	6.26034	4.80846	2.18657	2.17008	8.25762	6.26034	2.95939	2.95315	4.5415	4.10234	3.59858	4.71429
177.8	5.56921	5.08185	2.0752	2.3406	8.17813	5.56921	2.7087	3.10169	4.37688	3.79138	3.66999	4.78253
177.9	5.72522	5.2432	2.08166	2.25426	8.70085	5.72522	2.77027	3.09114	4.30747	3.88859	3.64425	4.85026
178	6.02449	5.19955	2.08584	2.29298	8.32863	6.02449	3.01245	2.90601	4.16953	3.52831	3.65551	5.0949
178.1	5.474	5.27895	2.01287	2.30744	8.07819	5.474	2.63142	2.77646	3.87553	3.93316	3.69223	4.76896
178.2	5.48065	5.09735	2.17606	2.29226	8.58483	5.48065	2.68262	3.02578	4.50383	3.95948	3.49487	4.92199
178.3	5.71148	5.37705	1.9833	2.32473	8.3547	5.71148	2.91123	2.98604	3.87765	3.6923	3.58677	4.7504
178.4	5.78444	5.3043	1.97767	2.35643	8.24526	5.78444	2.6219	2.84864	4.1444	3.68975	3.71768	4.74005
178.5	5.60989	4.87189	2.13605	2.30077	8.48069	5.60989	2.53911	3.11974	4.32477	3.80103	3.71031	4.9397
178.6	5.94646	5.17075	2.22628	2.31361	8.1328	5.94646	2.8875	3.09084	3.98203	3.92878	3.50546	4.75141
178.7	5.83671	4.8372	2.14412	2.21799	7.69114	5.83671	2.57737	3.25755	4.03296	3.79786	3.7133	4.86928
178.8	6.18509	5.2325	2.17395	2.32873	8.3432	6.18509	2.95674	2.98509	4.09641	3.73385	3.57855	4.87699
178.9	5.75276	5.06265	2.05445	2.32523	8.33393	5.75276	2.50833	3.16784	4.17904	3.55079	3.52685	5.11535
179	5.99709	4.85859	2.11007	2.27846	7.70916	5.99709	2.67552	2.89979	3.83106	3.54528	3.61978	5.39128
179.1	5.8041	4.96912	2.14963	2.23861	8.17515	5.8041	2.75766	2.86021	4.11726	3.63467	3.62928	4.97513
179.2	5.93838	4.83469	2.18784	2.31487	7.84464	5.93838	2.66838	3.10295	4.0157	3.65724	3.71963	4.84353
179.3	5.83496	5.0418	2.16147	2.22442	8.17647	5.83496	2.64241	3.08308	4.17832	4.02462	3.60782	5.01792
179.4	6.42082	5.18395	1.97643	2.30471	8.24602	6.42082	2.83912	3.01932	4.175	4.03392	3.59383	4.94918
179.5	5.72609	4.75697	2.13199	2.33942	7.5765	5.72609	2.84042	3.13322	4.1108	3.79153	3.61192	4.8743
179.6	6.71797	5.12815	2.11673	2.29476	8.33509	6.71797	2.79337	3.0103	4.46562	4.07576	3.98615	4.873
179.7	6.51984	5.46125	2.10543	2.33468	8.49449	6.51984	2.83372	3.20506	4.06956	3.76558	3.68279	5.12709
179.8	5.91104	4.93792	2.10272	2.21247	7.80712	5.91104	3.05986	3.09955	3.83661	3.53933	3.80865	4.86646
179.9	6.41247	4.93971	2.14979	2.30848	8.06842	6.41247	2.66893	3.25121	4.45872	3.83033	3.69888	4.71645
180	5.75673	4.9523	2.09756	2.31342	8.48561	5.75673	3.16643	3.12826	4.72411	3.73125	3.76737	4.72096
180.1	5.97398	4.60459	2.12639	2.31988	7.98229	5.97398	3.14394	3.10931	4.55466	3.86372	3.68578	4.69118
180.2	5.93144	4.93171	2.009	2.31735	8.79133	5.93144	2.47514	3.07861	4.91357	3.57954	3.40428	4.61097
180.3	6.09294	5.06455	1.96863	2.31702	8.76436	6.09294	2.28166	3.15124	5.1089	3.72401	3.48357	4.8701
180.4	5.61583	4.9648	2.08369	2.37369	8.36014	5.61583	2.96055	3.18012	4.59112	3.7817	3.67664	4.73991
180.5	5.63236	4.66286	2.21173	2.39253	7.93525	5.63236	2.86715	2.92771	4.4025	3.85838	3.60477	4.72311
180.6	5.73179	4.78801	2.09353	2.31108	7.77252	5.73179	2.53661	2.99583	4.31605	3.75618	3.46777	4.76173
180.7	5.7393	4.59641	1.99961	2.38102	8.57348	5.7393	2.5494	2.8714	5.1421	3.76929	3.49016	4.78158
180.8	5.7306	4.9257	2.02921	2.2865	8.5902	5.7306	2.48095	3.03755	4.69468	3.62018	3.55585	4.60098
180.9	5.89546	4.99146	2.12628	2.33918	8.23296	5.89546	2.44706	3.1306	4.57146	3.73369	3.45021	4.8697
181	5.57376	4.86855	2.11487	2.35263	8.41797	5.57376	2.44126	3.06519	4.82301	3.67335	3.4604	4.79637
181.1	5.34863	4.84591	2.18439	2.36909	8.24734	5.34863	2.41848	2.97593	4.57604	3.69617	3.44307	4.8566
181.2	5.77013	4.9089	2.20061	2.25636	7.75443	5.77013	2.67237	3.23882	4.12688	3.73735	3.61152	4.56082
181.3	5.70101	4.8003	2.0803	2.30726	7.57898	5.70101	2.66511	3.04732	4.3397	3.71975	3.67927	4.73277
181.4	5.60966	4.92298	2.03458	2.25482	8.26848	5.60966	3.01069	3.14802	4.32549	3.90584	3.67707	4.83209
181.5	5.37669	4.74601	2.12863	2.29017	8.14365	5.37669	2.56523	3.1294	4.12071	3.81465	3.53718	4.80068
181.6	6.13326	4.78759	1.96717	2.34655	8.30964	6.13326	2.61332	2.91216	4.8738	3.77563	3.60141	4.40287
181.7	5.70939	4.72124	2.14143	2.31295	8.16732	5.70939	2.58457	3.0394	4.34215	3.71738	3.45507	4.49399
181.8	5.93403	4.93242	2.01628	2.2676	7.79178	5.93403	2.44891	3.17191	4.38507	3.72682	3.63068	4.67019
181.9	5.45718	4.77149	2.0962	2.26835	7.64963	5.45718	2.83148	3.02704	4.00779	3.68141	3.86009	4.8209
182	5.57612	5.30735	2.16479	2.33214	8.06386	5.57612	2.62671	3.09069	4.17244	3.46542	3.54377	4.85697
182.1	5.84217	4.84945	2.14745	2.34789	7.54131	5.84217	2.86723	3.14916	3.81476	3.65376	3.64021	4.64039
182.2	5.93616	4.88661	2.11322	2.29036	8.08089	5.93616	3.08842	2.89487	4.68274	3.7126	3.73024	4.58218
182.3	5.18203	4.85557	2.08229	2.23618	7.55903	5.18203	2.82908	3.1948	4.14111	3.6696	3.74342	4.90145
182.4	5.69814	4.79117	2.22743	2.30364	7.61784	5.69814	2.55347	3.2342	4.22086	3.68759	3.56098	4.84852
182.5	5.62502	4.98492	2.19586	2.26797	7.78197	5.62502	2.53631	3.33856	4.11254	3.67948	3.53652	4.72234
182.6	5.85595	4.96078	2.23212	2.23278	7.77742	5.85595	2.70707	3.0998	4.02927	3.80701	3.56266	4.68335
182.7	5.58168	4.85286	2.13028	2.29214	8.34295	5.58168	3.18089	3.08492	4.51081	3.59173	3.77825	4.81407
182.8	5.62418	5.5067	2.0185	2.33764	8.76777	5.62418	3.0877	3.16011	4.30512	3.4293	3.44894	4.59163
182.9	6.00241	4.54948	2.12063	2.40943	7.48977	6.00241	2.42168	3.06843	4.46854	3.5619	3.45001	4.57965
183	5.53557	4.79661	2.10988	2.31792	8.22805	5.53557	2.47392	2.97477	4.50824	3.83099	3.37594	4.64647
183.1	5.50924	4.83073	2.00642	2.29354	8.2019	5.50924	2.93793	3.12811	4.66775	3.94874	3.68928	5.01811
183.2	5.54508	4.90006	2.19769	2.3496	7.58243	5.54508	2.65055	2.96346	4.25547	3.77683	3.63066	4.58699
183.3	5.61791	5.007	2.13638	2.32611	8.37491	5.61791	2.48064	2.8849	4.39949	3.85752	3.46017	4.67849
183.4	5.35689	4.91157	2.19028	2.29025	8.32751	5.35689	2.45074	2.91498	4.39225	3.72065	3.53898	4.79554
183.5	5.87446	4.86522	2.05191	2.28347	7.80534	5.87446	2.44837	3.05154	4.16336	3.76534	3.56412	4.76693
183.6	5.68023	4.88264	2.18285	2.10709	7.81402	5.68023	2.50805	3.14313	4.04589	3.85114	3.72823	4.4185
183.7	5.74251	5.1241	2.03956	2.20181	7.75671	5.74251	3.02648	2.91793	4.18192	3.96548	3.53424	4.72225
183.8	5.6555	4.80408	2.07116	2.34892	7.66891	5.6555	2.61584	3.07915	4.12263	3.69823	3.54419	4.8887
183.9	5.73805	4.96331	2.09422	2.29445	7.58878	5.73805	3.01306	3.41737	4.07892	3.5379	3.79364	4.83336
184	6.00024	5.1565	2.13374	2.39526	7.32376	6.00024	2.81784	3.45193	3.7367	3.64538	3.88605	4.62223
184.1	5.41406	4.69084	2.1455	2.37507	7.36204	5.41406	2.86734	3.26566	3.8813	3.66565	3.74052	4.45613
184.2	5.95926	5.22395	2.07824	2.37441	7.51182	5.95926	3.04811	3.08134	4.25367	3.8525	3.83213	4.38462
184.3	5.67193	5.03735	2.13918	2.31399	7.47526	5.67193	2.59441	3.21124	3.73985	3.70831	3.48177	4.73417
184.4	5.40559	4.88251	2.03399	2.27416	7.33209	5.40559	2.38364	3.03737	3.80751	3.58686	3.47274	4.81179
184.5	5.79289	5.01235	2.12379	2.30949	8.07883	5.79289	2.4403	3.09219	4.27679	3.87683	3.51332	4.72471
184.6	5.96366	4.95606	2.09278	2.28447	7.68248	5.96366	2.48863	3.0416	4.07266	3.86732	3.52566	4.57883
184.7	6.19796	5.00325	2.13185	2.33337	7.1441	6.19796	2.92885	2.94459	3.80054	3.80139	3.63293	4.54331
184.8	5.18795	4.70338	2.10845	2.25675	8.09206	5.18795	2.7465	2.81189	4.60053	3.69916	3.63793	5.02607
184.9	5.67352	4.8502	2.13813	2.28633	7.86355	5.67352	2.4996	2.9641	4.20332	3.81393	3.59872	4.89377
185	5.91546	4.77165	2.15199	2.28449	8.13838	5.91546	2.48964	3.0411	4.3589	3.84238	3.54872	4.72868
185.1	6.06079	4.8704	2.22905	2.35352	8.59876	6.06079	2.44182	3.14921	4.77768	3.75445	3.59245	4.75376
185.2	5.43771	4.94168	2.07454	2.29909	8.57043	5.43771	2.49525	3.00013	4.60766	3.5517	3.61601	4.85248
185.3	5.75964	4.76856	2.13043	2.32573	8.18251	5.75964	2.33357	3.24364	4.53401	3.66084	3.5395	4.85091
185.4	5.98813	4.87328	2.23061	2.3358	8.08302	5.98813	2.4874	2.92923	4.27468	3.68364	3.55755	4.76464
185.5	5.9724	5.135	2.27044	2.37628	9.44346	5.9724	2.7559	3.23873	5.401	3.80619	3.6279	4.82712
185.6	5.85285	4.76976	2.08918	2.24432	8.94419	5.85285	2.42848	2.78153	5.1549	3.69624	3.55383	4.52372
185.7	5.53254	5.028	2.12579	2.2626	7.89762	5.53254	2.47457	2.84565	4.21449	3.59252	3.70818	4.83636
185.8	5.2905	4.94236	2.20531	2.21211	7.70738	5.2905	2.61654	2.84203	3.88991	3.72214	3.57445	4.87473
185.9	5.43811	4.74393	2.06885	2.26641	7.63821	5.43811	2.24433	2.91229	4.32887	3.70444	3.4538	4.80267
186	5.75741	5.0639	2.20316	2.28992	8.22158	5.75741	2.58433	2.9088	4.14877	4.10443	3.54084	4.99755
186.1	5.64498	4.92545	2.09194	2.25578	7.88603	5.64498	2.66665	2.91675	4.04794	3.71991	3.65596	4.35341
186.2	5.76617	4.96538	2.13953	2.22408	8.00915	5.76617	2.66035	3.14825	4.1888	3.80131	3.71245	5.02747
186.3	5.24938	5.0128	2.09449	2.27669	8.01322	5.24938	2.54854	2.98427	4.05711	3.75907	3.54428	4.92767
186.4	5.6788	4.77569	2.00881	2.30275	8.23603	5.6788	2.65346	3.09848	4.49646	3.6663	3.43569	4.57366
186.5	6.36084	4.87234	2.15117	2.3157	7.71523	6.36084	2.49982	3.17897	4.00387	3.97612	3.56911	4.86198
186.6	5.51942	4.99724	2.08012	2.34872	7.72077	5.51942	2.99315	3.08282	4.01741	3.79225	3.70356	5.05887
186.7	5.47877	4.97133	2.05883	2.24689	8.08587	5.47877	2.9347	2.96247	4.14574	3.68837	3.59749	4.8971
186.8	5.28773	4.78634	2.15862	2.29394	8.07202	5.28773	2.87956	3.00432	4.43246	3.68429	3.5897	5.10836
186.9	5.99728	4.82874	2.11375	2.3653	7.59262	5.99728	2.76645	3.05997	4.00361	3.71585	3.74884	4.84374
187	5.62218	4.92455	2.17083	2.3175	7.39978	5.62218	3.14926	3.13669	3.94577	3.46729	3.66329	4.5431
187.1	5.64134	4.89246	2.0709	2.3048	8.0681	5.64134	3.12504	2.9589	4.42169	3.54922	3.64796	4.69238
187.2	5.50856	4.95671	2.19446	2.43132	7.68109	5.50856	2.68411	2.96653	3.96984	3.8413	3.58097	4.71246
187.3	5.47161	5.3128	2.25122	2.38396	8.19404	5.47161	2.45089	2.93642	3.90878	3.89475	3.56243	4.72832
187.4	5.36759	5.0307	2.21414	2.25289	7.9352	5.36759	2.45843	3.09452	3.90372	3.54565	3.5553	4.87864
187.5	5.45799	4.77179	2.05838	2.35513	7.79019	5.45799	2.47747	3.27745	4.05506	3.77088	3.56361	4.82051
187.6	5.52305	4.82634	2.1198	2.25826	7.9508	5.52305	2.59749	3.28773	4.03515	3.67066	3.46435	4.9528
187.7	5.65925	4.91819	2.18861	2.31255	8.03351	5.65925	2.57103	3.01886	4.09619	3.58716	3.56385	4.82315
187.8	5.15848	4.78831	2.01966	2.32146	7.76192	5.15848	2.44033	3.2468	4.18126	3.74937	3.52092	5.07416
187.9	5.64856	4.79394	2.19724	2.32443	7.44853	5.64856	2.47218	3.06135	3.76492	3.76697	3.51179	4.78142
188	5.86149	4.95986	2.01665	2.38707	7.52333	5.86149	2.4865	2.99226	3.696	3.91818	3.54073	4.67101
188.1	5.8503	5.0617	2.22646	2.41952	7.88567	5.8503	2.64832	3.104	4.03897	3.5258	3.52008	4.59835
188.2	5.75187	5.00545	2.21185	2.26918	7.42713	5.75187	2.57097	3.1095	3.85125	3.73786	3.60423	4.85086
188.3	5.14215	4.83116	2.06822	2.28119	7.99873	5.14215	2.54908	2.9221	4.21307	3.89476	3.50888	4.62021
188.4	5.18518	4.94372	2.06668	2.28891	7.8029	5.18518	2.54085	3.06124	3.98942	3.76985	3.63945	4.77497
188.5	5.66624	4.99766	2.137	2.27785	7.86197	5.66624	2.50333	3.01496	4.12688	3.90382	3.70019	4.64961
188.6	5.76189	5.04775	2.00258	2.34533	7.57559	5.76189	2.6317	3.16783	3.85893	3.61192	3.5163	5.06668
188.7	5.49432	5.0441	1.95023	2.32315	7.34124	5.49432	2.4565	2.94882	3.91763	3.68526	3.46083	4.68642
188.8	5.55159	5.03915	2.00347	2.22579	7.99941	5.55159	2.57401	3.05706	4.48384	3.80912	3.41569	4.89888
188.9	5.7698	5.00895	1.94109	2.3914	7.59685	5.7698	2.48002	3.00796	4.25748	3.69341	3.43966	4.8708
189	5.84667	5.01045	2.08004	2.29468	7.1078	5.84667	2.69511	3.13734	3.81906	3.61634	3.4335	4.78299
189.1	5.58561	5.1682	1.99529	2.3158	7.70148	5.58561	2.83689	3.08812	3.83202	3.69851	3.52981	4.81685
189.2	5.28403	5.0317	1.96584	2.32483	7.49224	5.28403	2.51905	3.16726	3.89303	3.85665	3.50661	4.96284
189.3	5.58665	4.99324	2.06988	2.20408	7.45193	5.58665	2.65643	2.96773	3.79609	3.61121	3.51979	4.75674
189.4	5.94927	5.32115	2.09527	2.29233	8.02145	5.94927	2.7576	2.98379	4.04878	3.77864	3.4984	4.65294
189.5	5.15644	5.2782	2.19066	2.24626	7.81569	5.15644	2.69591	3.04325	4.06036	3.76536	3.4073	5.03521
189.6	5.6974	5.17425	2.23519	2.41428	7.92774	5.6974	2.90944	2.93695	4.2545	3.64638	3.40778	4.62811
189.7	5.54291	4.77403	2.10283	2.35033	7.48685	5.54291	2.51044	3.03722	4.1457	3.83859	3.53883	4.81982
189.8	6.12432	4.98757	2.10872	2.36469	7.66169	6.12432	2.47701	3.01051	3.87362	3.69229	3.49226	4.6821
189.9	5.30602	5.0133	2.27665	2.29415	8.0324	5.30602	2.76829	2.94963	4.27243	3.66475	3.59524	5.02098
190	5.90413	4.90127	2.30155	2.30308	7.56114	5.90413	2.56548	3.06237	3.94306	3.79327	3.44515	4.82232
190.1	5.70589	4.718	2.10841	2.36817	7.25687	5.70589	2.67536	2.99944	4.06162	3.6027	3.70413	4.75802
190.2	5.32159	4.69858	2.25082	2.35891	7.1718	5.32159	3.06369	3.25573	3.99644	3.59642	3.73641	4.75757
190.3	5.91871	4.8486	2.17522	2.37471	7.33275	5.91871	2.52506	2.85987	4.08646	3.78946	3.44528	4.63804
190.4	5.64005	5.0272	2.28845	2.37527	7.82963	5.64005	2.47194	3.00829	4.19775	3.63841	3.44374	4.69843
190.5	5.58104	4.89297	2.09476	2.32301	7.32118	5.58104	2.79723	3.19794	3.82198	3.83893	3.56198	4.71614
190.6	5.80157	4.97351	2.16705	2.25708	7.59076	5.80157	2.46261	2.94891	3.85722	3.5122	3.5761	4.86387
190.7	5.40797	5.03035	2.21309	2.31997	7.92787	5.40797	2.47621	3.00403	3.99219	3.67398	3.5724	4.88044
190.8	5.69238	5.04295	2.15433	2.42507	7.72651	5.69238	2.59491	3.16094	4.09134	4.15627	3.51181	4.87828
190.9	5.68943	4.88872	2.1898	2.37332	8.14868	5.68943	3.08555	2.95553	4.84046	4.00671	3.70841	4.81597
191	5.7661	5.04565	2.33006	2.38838	7.81062	5.7661	3.09328	3.02989	4.02248	3.72101	3.67699	4.62259
191.1	5.8665	5.0581	2.27101	2.30782	8.13776	5.8665	2.90186	2.80834	4.35525	3.68302	3.64831	4.84692
191.2	5.90695	5.08105	2.33259	2.27304	7.70871	5.90695	2.89039	3.14135	4.03986	3.67438	3.72932	4.69911
191.3	5.61728	4.8432	2.17561	2.27793	7.67905	5.61728	3.20127	2.8976	3.97784	3.66598	3.52848	4.72407
191.4	5.94449	4.89942	2.34823	2.31566	7.753	5.94449	2.78206	3.08372	4.35342	3.52873	3.59623	4.46181
191.5	5.39689	4.85945	2.16873	2.34913	8.01951	5.39689	2.76917	2.98685	4.1853	3.6731	3.58961	4.72016
191.6	5.35838	4.99451	2.15231	2.3313	7.90787	5.35838	2.51456	2.95452	4.33366	3.71366	3.58732	4.74252
191.7	5.68616	4.79697	2.22883	2.29525	7.79847	5.68616	2.70211	3.13714	4.39499	3.73124	3.62985	4.4942
191.8	5.37873	4.72143	2.23175	2.24238	7.94287	5.37873	2.70773	3.02429	4.57433	3.65093	3.73633	4.83218
191.9	5.54237	4.7337	2.24872	2.35823	7.37242	5.54237	2.5273	3.15759	3.93695	3.64644	3.547	4.82262
192	5.68936	4.90716	2.16618	2.30252	8.03624	5.68936	2.51787	3.2357	4.46188	3.7224	3.50333	4.81355
192.1	5.6821	4.93084	2.21967	2.30249	7.89945	5.6821	2.67584	3.15561	4.23876	3.67707	3.58116	4.94189
192.2	5.81736	4.79514	2.18389	2.27104	8.22518	5.81736	2.34685	2.96064	4.59561	3.71524	3.57637	4.52979
192.3	5.99808	4.79117	2.04431	2.33903	7.92953	5.99808	2.4311	2.95135	4.30509	3.96462	3.53842	4.67128
192.4	5.93413	4.89771	2.24218	2.33607	8.0932	5.93413	2.59227	3.09154	4.37854	3.68285	3.61169	4.77437
192.5	5.68557	4.94416	2.17225	2.24776	8.22193	5.68557	2.77842	2.9911	4.29397	3.71485	3.78986	4.68125
192.6	5.72664	4.83915	2.19481	2.20378	7.46455	5.72664	2.36749	2.97718	3.86141	3.70256	3.48166	4.7666
192.7	5.2476	4.91535	2.18142	2.32102	7.92004	5.2476	2.93242	3.21448	4.38724	3.5804	4.69883	5.0122
192.8	5.33955	5.01615	2.15504	2.27341	8.59654	5.33955	2.87033	3.29106	4.74368	3.71747	4.43218	4.84255
192.9	6.10573	5.15695	2.09358	2.3298	8.90975	6.10573	2.59821	3.09292	4.69878	3.84273	4.30112	4.89223
193	5.68481	5.12495	2.19543	2.44618	7.94979	5.68481	2.90565	3.12176	4.20889	3.85855	4.63792	4.89365
193.1	5.47467	4.90081	2.13828	2.25803	8.68905	5.47467	3.17297	3.08568	5.19655	4.04344	4.60288	4.85538
193.2	5.52984	4.88828	2.26475	2.28852	7.81719	5.52984	2.86347	3.11071	4.18492	3.613	4.50747	4.76047
193.3	5.6125	5.20665	2.28765	2.27447	8.09294	5.6125	2.73589	3.11841	4.11364	3.72974	4.27542	4.69688
193.4	5.64098	5.16635	2.21586	2.28765	8.53207	5.64098	3.10803	2.91288	4.34032	3.94176	3.73833	4.86888
193.5	5.63023	5.09145	2.25052	2.24248	7.44917	5.63023	2.92971	2.85657	3.75805	4.00944	4.29682	4.77611
193.6	5.69149	5.12375	2.18684	2.26306	7.54411	5.69149	3.10495	3.13302	3.79645	3.70377	3.96269	4.60429
193.7	5.36848	4.95523	2.20526	2.28569	7.91441	5.36848	3.00325	3.25325	3.88538	3.83797	3.8007	5.05283
193.8	5.78604	4.93524	2.14373	2.36721	7.65715	5.78604	2.87128	2.9746	4.21501	3.645	3.74924	4.56137
193.9	5.58549	5.319	2.29526	2.17374	7.85966	5.58549	3.0314	2.98027	4.59959	3.76299	3.49684	4.74197
194	5.7607	5.1814	2.25373	2.21823	7.9256	5.7607	2.78032	2.86171	4.25256	3.7027	3.62723	4.9569
194.1	5.74698	5.02625	2.1911	2.25847	7.34284	5.74698	2.86364	3.02065	4.0282	3.75385	3.68107	4.66469
194.2	5.34884	5.1426	2.37099	2.28887	7.39968	5.34884	2.79198	3.1742	4.22021	3.70512	3.64044	4.94297
194.3	5.4706	5.01155	2.20757	2.24161	7.31114	5.4706	2.84769	2.92113	4.12617	3.79351	3.51972	4.99718
194.4	5.72963	4.98563	2.14006	2.21669	7.26096	5.72963	2.71068	3.02702	3.8987	3.53078	3.65118	4.59863
194.5	5.82686	5.05855	2.21423	2.29991	7.77363	5.82686	3.02736	2.80742	4.33255	3.53105	3.60802	4.57812
194.6	5.5325	4.9349	2.26821	2.20526	7.18435	5.5325	2.95221	2.86931	4.16294	3.85847	3.63969	4.90126
194.7	5.37456	4.91294	2.12084	2.21693	7.59936	5.37456	2.92024	2.94119	4.29857	4.03365	3.62175	4.69069
194.8	5.46336	4.90747	2.15748	2.29268	7.84398	5.46336	2.83252	2.95476	4.08822	3.66401	3.62815	4.92116
194.9	5.40926	5.31875	2.08944	2.35622	7.98438	5.40926	2.9612	2.83834	4.13866	3.52039	3.55839	4.65437
195	5.5534	5.1993	2.11082	2.30663	8.02618	5.5534	2.72515	2.81569	4.2682	3.54498	3.69806	4.60938
195.1	5.53819	5.20325	2.1054	2.25654	7.25913	5.53819	2.95235	3.07163	4.00613	3.4885	3.57197	4.44573
195.2	5.78993	5.3401	2.24799	2.27048	7.58691	5.78993	3.16418	2.97734	4.0918	3.64981	3.62685	4.65299
195.3	5.44777	5.31725	2.18974	2.31683	7.56388	5.44777	3.01241	2.8717	3.83581	3.6982	3.59127	4.69564
195.4	5.55558	5.27955	2.10514	2.31706	7.7732	5.55558	3.20386	2.8831	3.9452	3.52759	3.99432	4.54209
195.5	5.51741	5.256	2.2019	2.36507	7.83239	5.51741	3.11092	2.89681	4.11667	3.64003	4.15693	4.64347
195.6	5.59004	5.199	2.1523	2.26494	7.16154	5.59004	2.93594	2.98489	3.84654	3.72785	4.16007	4.7805
195.7	5.65643	5.71405	2.11556	2.32574	7.75502	5.65643	2.9098	3.05401	3.79507	3.5707	4.24832	4.81266
195.8	5.56915	5.8197	2.14096	2.35272	7.864	5.56915	3.14344	2.90177	3.72472	3.4584	3.78011	4.57041
195.9	5.8728	5.2973	2.16529	2.16821	7.69034	5.8728	2.91697	3.20882	3.84342	3.74554	3.8604	4.4216
196	8.31418	5.1427	2.12084	2.33407	7.78788	8.31418	3.02158	2.97307	3.93322	4.06386	4.01555	4.67417
196.1	7.92523	5.29195	2.26598	2.25576	7.24496	7.92523	3.06835	2.74327	3.76075	4.0186	4.37656	4.60223
196.2	7.41994	5.00865	2.20967	2.24383	7.27144	7.41994	2.99442	3.15004	3.71995	3.89805	4.40232	4.60258
196.3	8.34369	4.83678	2.13122	2.27292	7.2781	8.34369	2.9293	3.11232	3.63923	3.79118	4.53375	5.02016
196.4	7.13876	4.74101	2.0724	2.28803	7.17171	7.13876	3.19423	2.9727	3.97724	3.72351	4.43316	4.87272
196.5	7.80938	4.66018	2.08745	2.45309	6.77271	7.80938	3.08952	2.95434	3.99138	3.86621	4.73859	4.86019
196.6	7.55915	4.50427	2.17041	2.32547	6.96992	7.55915	2.97802	2.93333	4.04214	3.71121	4.30237	4.81475
196.7	7.23569	4.71765	2.15734	2.28377	7.65996	7.23569	2.95412	3.07259	4.24512	3.61978	4.36006	4.73848
196.8	7.80204	4.83678	2.08186	2.37438	7.51208	7.80204	3.03621	3.28982	3.98635	3.86639	4.15449	5.1356
196.9	7.66173	4.77065	2.21593	2.22819	7.05663	7.66173	3.06263	3.08113	3.8357	3.95199	4.42474	4.79608
197	7.63779	4.59746	2.16645	2.29791	7.18905	7.63779	2.90477	3.14829	3.96265	3.73722	4.46495	4.62596
197.1	7.50999	4.73019	2.09313	2.29446	7.40099	7.50999	2.97512	2.90783	4.05987	3.95085	4.35535	4.8128
197.2	7.23257	4.52344	2.13985	2.2909	7.02041	7.23257	3.12224	2.90524	4.10585	3.57619	4.70061	4.75589
197.3	7.38835	4.70962	2.15163	2.26167	7.4771	7.38835	3.04326	2.93194	4.02271	3.63721	4.60445	4.83522
197.4	7.62903	4.71304	2.18366	2.31209	7.09556	7.62903	3.20771	2.81524	3.6459	3.84053	4.59669	4.71106
197.5	7.52294	5.05285	2.21624	2.31792	7.93942	7.52294	2.92798	2.85182	3.95683	4.03452	4.31345	4.73284
197.6	7.4359	4.92697	2.19387	2.30171	7.88926	7.4359	2.9831	3.01925	4.1169	3.99777	4.56499	4.58249
197.7	7.28474	4.77999	2.1518	2.25954	7.30187	7.28474	3.11928	3.15849	4.26997	3.75899	4.98506	5.00758
197.8	7.19274	4.68841	2.18457	2.31898	7.27747	7.19274	2.86923	2.93876	4.09852	3.90896	4.61999	4.76124
197.9	7.43607	4.4805	2.07965	2.34831	7.31491	7.43607	3.09653	3.03894	4.05807	3.83439	4.77666	4.75532
198	6.90689	4.72013	2.20155	2.24721	7.71333	6.90689	3.04472	3.15928	4.31564	3.74194	4.68724	4.6094
198.1	7.33967	4.88733	2.18411	2.3532	7.48862	7.33967	3.06521	2.94745	4.11109	3.97718	4.69212	4.49428
198.2	7.36818	4.68783	2.12133	2.29092	7.07036	7.36818	3.12728	3.00356	3.9556	3.74426	5.10871	4.84819
198.3	7.08978	4.80713	2.2327	2.31633	7.04031	7.08978	3.23189	3.21173	4.04197	3.99952	5.18748	5.04374
198.4	7.86495	4.85656	2.15157	2.42105	7.34422	7.86495	3.00929	2.79114	4.0836	3.99831	5.09322	4.52846
198.5	7.08553	4.68482	2.2309	2.25446	7.17193	7.08553	3.08785	2.75593	3.88969	3.49612	5.00899	4.72867
198.6	6.70956	4.52279	2.13951	2.25114	6.74143	6.70956	3.18524	2.92947	3.91565	3.81102	5.05942	5.03453
198.7	6.73095	4.5389	2.10371	2.22272	6.70343	6.73095	3.48962	3.15315	3.91965	3.95181	5.21605	5.01217
198.8	6.9822	4.78322	2.26945	2.196	6.83955	6.9822	3.23713	2.80002	3.79187	4.10235	4.76866	4.60578
198.9	6.39127	4.59579	2.16655	2.29175	6.79351	6.39127	3.50292	2.92305	4.11325	3.88748	5.01236	4.66779
199	5.98761	4.73853	2.12173	2.16687	7.10364	5.98761	3.46624	2.76758	4.47987	3.89118	5.04496	5.21974
199.1	6.33374	4.73137	2.20983	2.33304	8.42682	6.33374	3.03171	2.68883	5.1082	3.91657	5.20183	4.74721
199.2	6.61736	4.70195	2.23274	2.28239	7.13208	6.61736	3.12506	2.79104	3.92674	3.82978	5.3774	4.68708
199.3	6.04251	4.46852	2.13809	2.37848	6.75934	6.04251	3.05022	2.83313	4.31942	3.72946	5.73553	4.78224
199.4	7.3651	4.57293	2.23763	2.28237	7.19508	7.3651	2.94673	2.83068	4.1315	3.9091	5.68886	4.77934
199.5	7.24249	4.62669	2.30279	2.29124	7.20934	7.24249	3.03583	2.94879	4.0692	4.08207	5.30183	4.53611
199.6	6.07916	4.55579	2.2246	2.34017	7.30684	6.07916	3.16567	3.03505	4.55782	3.91324	5.71206	4.73074
199.7	5.81276	4.57897	2.28165	2.39696	7.2343	5.81276	3.1086	2.93921	4.44179	3.85067	5.46861	4.55793
199.8	5.75016	4.58969	2.20739	2.37464	7.17281	5.75016	2.91968	3.2121	4.32089	3.59149	5.22653	4.74949
199.9	5.77686	4.55228	2.23488	2.21274	6.84509	5.77686	2.99348	3.08698	4.41413	3.69265	5.34552	4.79523
[truncated: 3 more rows]

## Sheet: 336_337
DISTANCE 337 O AND 336 ND1									Raw data for Figure 3B
Time	WILD (A)	MUTANT (A)
0	3.03	4.99
1	3.03	4.99
2	3.16	5.59
3	3	5.63
4	2.86	5.9
5	2.87	5.64
6	3.18	4.85
7	2.8	4.79
8	2.99	4.75
9	3.11	4.89
10	2.77	5.67
11	2.81	4.81
12	2.86	5.13
13	3	4.98
14	3.42	5.25
15	2.92	5.02
16	2.69	5.13
17	3.26	5.13
18	2.82	5.13
19	2.68	5.13
20	3.05	3.01
21	3.17	5.97
22	3.85	5.95
23	3.03	5.98
24	3.24	5.67
25	2.68	4.87
26	4.31	4.88
27	2.87	4.82
28	2.77	4.86
29	3.02	4.9
30	2.88	5.13
31	3.07	5.85
32	2.83	5.06
33	3.24	5.81
34	2.8	5.02
35	2.74	5.91
36	3.02	5.86
37	3.08	5.87
38	2.82	5.04
39	2.75	5.11
40	2.98	5.31
41	2.89	5.13
42	3.02	5.08
43	2.86	5.19
44	2.95	5.76
45	2.91	5.99
46	2.79	5.04
47	3.16	5.06
48	3	5.79
49	3.39	5.02
50	2.79	5.3
51	3.13	5.9
52	3.86	5.18
53	3.24	5.85
54	2.7	5.92
55	3.51	5.27
56	2.9	5.76
57	2.8	4.99
58	2.78	4.91
59	3.15	3.19
60	2.74	5.76
61	2.75	5.02
62	2.81	4.83
63	2.86	4.63
64	2.73	5.13
65	3.26	5.44
66	2.74	5
67	3.02	4.9
68	2.76	4.93
69	2.81	4.89
70	2.69	5.73
71	3.03	5.39
72	2.75	6.13
73	2.77	5.18
74	2.89	4.21
75	3.13	4.73
76	2.93	4.73
77	2.92	4.76
78	2.73	4.88
79	2.86	4.99
80	2.77	4.71
81	3.09	5.59
82	2.7	5.16
83	2.86	5.06
84	3.01	5.09
85	2.78	5.02
86	3.05	5.84
87	2.95	5.98
88	2.89	5.66
89	3.03	5.87
90	2.74	5.76
91	2.88	5.28
92	4.74	5.49
93	3.09	5.46
94	3.01	5.46
95	2.79	5.85
96	2.94	5.79
97	2.93	5.2
98	4.78	5.96
99	2.06	5.38
100	3.72	5.26
101	2.96	5.07
102	3.01	5.34
103	3.02	5.52
104	2.89	5.93
105	3.19	5.24
106	3.01	5.34
107	2.88	5.44
108	3.11	5.44
109	3.02	4.92
110	2.95	5.08
111	3.14	4.94
112	2.67	4.97
113	3.11	5.38
114	2.87	5.56
115	3.09	5.75
116	2.71	4.76
117	2.93	4.9
118	2.69	4.78
119	2.93	5.62
120	2.87	4.3
121	2.92	5.51
122	3.06	4.63
123	3.06	5.07
124	2.98	5.65
125	2.83	5.3
126	2.9	5.26
127	2.73	5.33
128	2.79	5.58
129	3.03	4.79
130	3.17	5.23
131	4.07	5.48
132	3.05	5.62
133	2.74	5.52
134	3.11	5.08
135	2.97	5.34
136	2.75	5.08
137	2.73	5.36
138	3.05	5.67
139	2.77	5.23
140	2.99	5.57
141	2.85	5.6
142	3.97	4.98
143	2.85	5.41
144	2.71	5.05
145	2.68	5.68
146	2.7	5.29
147	2.66	5.62
148	3.11	5.37
149	2.98	5.54
150	2.93	5.55
151	2.94	5.23
152	3.24	5.74
153	3.03	5.32
154	2.83	5.62
155	3.11	5.22
156	2.67	5.53
157	3.27	5.35
158	2.83	5.34
159	2.77	5.12
160	2.85	5.33
161	3.4	6.32
162	3.06	5.57
163	4.32	5.33
164	3.95	5.53
165	4.49	5.91
166	2.89	5.27
167	2.77	5.13
168	3.03	5.32
169	2.75	5.53
170	4.43	5.87
171	3.02	5.45
172	2.76	5.53
173	4.08	5.11
174	2.81	5.84
175	2.92	5.6
176	2.84	5.23
177	3.34	5.52
178	2.88	5.25
179	3.31	5.57
180	3.57	5.41
181	4.27	5.25
182	2.71	5.67
183	4.05	5.54
184	4.32	5.51
185	4.08	5.51
186	3.85	5.91
187	4.37	5.41
188	3.94	5.04
189	4.36	5.65
190	4.25	5.51
191	2.8	5.85
192	3.28	5.52
193	3.26	5.45
194	3.1	5.49
195	3.17	5.33
196	2.79	5.59
197	2.77	5.63
198	3.16	5.9
199	2.83	5.79
200	2.99	6

## Sheet: 336_351
DISTANCE 336 NE2 AND 351 OG						Raw data for Figure 3B
Time	WILD	R209E_MUTANT
0	3.09	4.54
1	3.09	4.54
2	3.87	4.31
3	3.87	5.45
4	2.9	5.35
5	3.12	4.69
6	3.25	6.1
7	3.27	6.04
8	3.18	5.18
9	3.29	6.17
10	3.21	5.5
11	3.42	4.97
12	3.1	5.31
13	3.94	5.69
14	3.62	7.25
15	3.35	5.38
16	3.83	5.62
17	3.27	4.88
18	3.4	5
19	3.63	5.28
20	3.68	5.6
21	3.25	4.44
22	3.74	5.2
23	3.94	5.07
24	3.95	5.22
25	3.24	4.87
26	3.15	5.64
27	3.31	4.91
28	3.65	4.92
29	3.18	4.61
30	3.66	4.65
31	5.77	4.97
32	4.94	5.07
33	4.12	5.14
34	4.18	5.5
35	3.33	5.38
36	3.91	5.01
37	3.67	4.79
38	3.2	5.22
39	3.44	6.06
40	3.2	5.6
41	3.61	4.73
42	3.61	5.21
43	3.69	4.41
44	3.15	4.95
45	3.8	4.74
46	3.92	5.72
47	3.48	5.99
48	3.85	5.15
49	3.17	4.9
50	3.2	5.1
51	3.69	6.38
52	4.18	5.69
53	4.31	5.45
54	3.44	4.58
55	3.32	5.18
56	3.2	4.92
57	3.188	5.11
58	3.13	5.1
59	3.85	5.93
60	4.82	4.85
61	5.02	4.84
62	4.54	5.06
63	4.39	5.08
64	3.45	5.14
65	4.01	6.18
66	3.76	6.47
67	3.76	5.77
68	3.34	4.72
69	4.78	5.33
70	4.69	5.79
71	4.83	5.02
72	4.19	5.24
73	5.05	5.52
74	4.79	5.15
75	4.2	5.42
76	4.49	5.09
77	3.81	5.13
78	3.32	4.92
79	3.76	4.87
80	3.99	4.7
81	3.98	5.44
82	3.11	5.34
83	3.32	4.74
84	3.89	4.69
85	3.06	4.45
86	4.63	5.35
87	4.54	5.48
88	3.97	4.8
89	3.65	5.22
90	3.36	5.63
91	3.54	5.4
92	3.79	4.85
93	3.96	5.91
94	3.45	6.07
95	4.39	4.74
96	4.54	5.16
97	5.06	4.79
98	4.82	3.99
99	3.85	3.92
100	3.25	5.21
101	3.31	6.12
102	3.19	5.89
103	3.1	6.09
104	3.67	5.43
105	3.89	4.75
106	2.56	5.57
107	2.93	3.84
108	2.82	5.2
109	2.95	4.96
110	2.81	6.35
111	2.88	6.04
112	3	7.35
113	2.71	6.66
114	2.85	6.35
115	4.64	5.32
116	2.89	6.65
117	3.16	6.37
118	4.16	6.34
119	3.35	6.59
120	5.35	7.9
121	3.75	6.57
122	5.2	7.05
123	4.34	6.86
124	4.27	8.48
125	4.29	6.41
126	4.09	6.98
127	5.52	5.05
128	5.07	6.03
129	4.58	6.33
130	6.14	7.62
131	6.52	7.22
132	4.15	6.99
133	4.82	7.96
134	3.25	7.65
135	2.82	6.6
136	2.97	6.44
137	2.88	5.14
138	2.83	5.15
139	2.97	6.29
140	3.49	5.37
141	7.12	5.59
142	5	5.2
143	3.79	6.51
144	3.32	7.01
145	3.95	6.09
146	4.1	5.68
147	4.32	5.57
148	3.47	6.86
149	3.99	7.05
150	3.3	7.51
151	3.93	6.68
152	3.79	7.01
153	3.09	8.32
154	2.9	6.36
155	3.8	7.16
156	3	5.24
157	3.87	6.07
158	3.2	6.57
159	3.04	7.03
160	3.05	5.51
161	3.89	7.81
162	2.78	7.07
163	3.73	6.41
164	2.89	6.77
165	2.69	6.38
166	3.06	7.58
167	3.15	8.3
168	3.48	4.2
169	2.75	4.11
170	2.95	4.32
171	2.97	4.28
172	3	4.12
173	2.84	4.32
174	2.81	4.1
175	2.82	4.46
176	2.83	3.77
177	2.97	3.93
178	2.76	4.33
179	3.24	4.23
180	3	3.9
181	2.74	4.18
182	2.56	3.65
183	2.93	3.86
184	2.82	4.21
185	2.95	4.11
186	2.81	4
187	2.88	3.7
188	3	3.91
189	2.71	3.71
190	2.85	3.84
191	4.64	3.63
192	2.89	3.99
193	3.16	4.65
194	4.16	3.9
195	3.35	4.35
196	5.35	4.39
197	3.75	4.19
198	5.2	4.47
199	4.46	4.54
200	3.46	5.65

## Sheet: 303_340
	Distance 303_340				Raw data for Figure 3B
Time(ns)	wild	mutant
0	6.89436	5.70371
1	5.48911	6.26098
2	5.88209	5.53733
3	6.59074	6.01612
4	6.59074	6.01612
5	6.30083	6.50021
6	6.27886	5.72177
7	6.15025	6.18832
8	6.20772	5.95873
9	5.46622	6.30942
10	5.88209	5.53733
11	5.73933	6.43328
12	6.18818	5.9562
13	5.62616	6.48029
14	5.85904	5.72732
15	5.8552	5.94034
16	5.48911	6.26098
17	6.31454	6.66575
18	6.33502	6.0441
19	8.0889	5.81959
20	7.99757	6.2389
21	8.3925	6.49998
22	7.94691	5.91277
23	7.94315	6.65139
24	8.71787	6.48832
25	8.35104	6.42673
26	7.38598	6.05793
27	5.53989	5.75199
28	6.47421	5.62221
29	6.0139	6.69022
30	6.12651	7.4221
31	7.29927	6.08805
32	6.41639	6.41251
33	6.06328	5.69102
34	8.07305	5.72546
35	6.77559	5.88051
36	6.98105	6.54809
37	6.81537	6.24331
38	7.39018	6.24471
39	6.63342	6.91238
40	7.269	6.42462
41	6.42631	6.70915
42	6.62026	5.56473
43	6.43133	6.46753
44	6.61729	6.41921
45	6.88017	5.82747
46	6.2121	5.74249
47	6.89065	6.26905
48	6.60724	6.02869
49	7.10891	5.77172
50	7.24145	5.41976
51	6.97966	5.76079
52	7.02552	6.0209
53	6.74357	5.20281
54	7.21669	6.30657
55	7.0752	6.06304
56	7.02621	5.91676
57	6.6137	5.84195
58	7.01075	5.55393
59	7.22572	5.77111
60	7.10515	5.84725
61	6.12535	5.62465
62	6.97187	5.15892
63	6.56644	5.38783
64	6.42767	5.72403
65	6.24213	6.70517
66	6.39191	6.29083
67	5.74899	6.03199
68	6.82264	5.97776
69	6.02226	6.00305
70	6.04434	5.5016
71	5.69958	5.8825
72	6.70459	5.70425
73	5.84725	7.39504
74	6.60021	8.38624
75	6.25666	5.48814
76	5.64666	5.92307
77	5.63789	5.8087
78	6.46312	6.55789
79	6.2061	5.48904
80	6.50822	6.01982
81	5.62516	6.08994
82	5.85705	5.71556
83	6.54014	5.75729
84	6.68635	5.71719
85	6.99093	5.78097
86	5.55136	5.79239
87	6.07356	5.81397
88	6.39684	5.18164
89	6.75373	5.82582
90	7.15271	5.60548
91	8.1046	7.75991
92	6.06691	8.61847
93	6.36283	8.13261
94	8.20285	5.79713
95	7.16477	6.21063
96	7.0412	5.70256
97	7.58094	5.04073
98	7.57906	5.82098
99	6.82284	5.66119
100	7.56294	5.86186
101	7.67967	5.31471
102	6.53267	5.37681
103	7.4931	5.68091
104	7.16875	6.21949
105	7.4927	5.18414
106	7.39375	6.31775
107	7.03559	5.53916
108	6.76591	5.72729
109	6.86447	6.17211
110	6.70803	7.83425
111	6.83529	7.47316
112	7.82196	7.74671
113	7.87127	7.99875
114	5.9281	6.87423
115	7.59781	8.25577
116	7.51815	8.13881
117	7.3464	8.4973
118	8.95979	6.89303
119	7.73881	7.88282
120	7.18909	5.07007
121	7.05358	5.92694
122	6.13204	6.14792
123	6.66104	4.8911
124	6.92936	4.92915
125	7.24336	5.19459
126	8.55184	5.2584
127	7.71335	5.42164
128	6.96272	5.25535
129	7.62299	5.08709
130	6.5711	5.68951
131	7.76541	5.03489
132	6.49301	5.69871
133	7.22293	5.28479
134	8.18801	4.97297
135	7.60478	5.08985
136	6.22117	5.79561
137	7.81278	5.4891
138	7.65823	5.42004
139	7.39056	5.47595
140	8.72555	5.49428
141	8.72368	5.27327
142	6.6913	5.35288
143	7.10928	4.93914
144	7.52994	5.14942
145	7.85191	5.06477
146	7.89267	5.39627
147	7.9126	5.61777
148	7.45552	5.32892
149	5.92647	5.36812
150	8.47076	4.88989
151	8.31393	5.89869
152	7.72401	5.9535
153	7.96328	5.79956
154	8.94465	6.08688
155	7.60658	6.03571
156	8.91451	5.99141
157	8.8101	5.51806
158	8.60736	6.07224
159	9.22119	5.8131
160	8.0991	5.92683
161	7.51994	5.61316
162	7.9075	5.63877
163	8.20731	5.37479
164	7.25766	5.60739
165	8.13058	5.6179
166	7.81951	5.68295
167	7.96338	5.78245
168	7.53536	5.48439
169	7.77851	5.66896
170	7.67421	5.50029
171	7.91256	5.17302
172	7.74665	5.58633
173	8.01032	5.64462
174	7.96997	5.18796
175	8.86327	6.25453
176	8.32863	6.02449
177	7.70916	5.99709
178	8.48561	5.75673
179	8.41797	5.57376
180	8.06386	5.57612
181	8.22805	5.53557
182	7.32376	6.00024
183	8.13838	5.91546
184	8.22158	5.75741
185	7.39978	5.62218
186	7.52333	5.86149
187	7.1078	5.84667
188	7.56114	5.90413
189	7.81062	5.7661
190	8.03624	5.68936
191	7.94979	5.68481
192	7.9256	5.7607
193	8.02618	5.5534
194	7.78788	8.31418
195	7.18905	7.63779
196	7.71333	6.90689
197	7.10364	5.98761
198	6.97846	6.78371
199	6.62671	5.54516
200	6.6267	5.54516
