# Supplementary material for: Allosteric cooperation in β-lactam binding to a non-classical transpeptidase
Source: eLife. 2022 Apr 27;11:e73055. doi: 10.7554/eLife.73055 (PMC9094749; doi:10.7554/eLife.73055)
Supplement: Figure 3—source data 2. [file elife-73055-fig3-data2.xlsx]

## Sheet: Sheet1
	Raw data on Nitrocefin hydrolysis assay for Figure 3C
		Nitrocefin (µM)	LdtMt2		R209E		H336A		S337A		S351A		C354A		M303A
		0	0.000216	0	0	0	0	0	0.0013	0.002384	0	0	0	0	0.003468	0.002384
		4	0.045912	0.054584	0.011935	0.020555	0.0271	0.0271	0.035072	0.036156	0.02168	0.00542	0	0	0.05892	0.046996
		8	0.061824	0.078084	0.020589	0.027237	0.02168	0.024932	0.040144	0.043396	0.028184	0.026016	0	0	0.053152	0.062908
		16	0.108472	0.08354	0.032544	0.033644	0.0271	0.036856	0.08354	0.09438	0.033604	0.033604	0	0	0.060776	0.091128
		40	0.179944	0.18428	0.027271	0.030333	0.023848	0.030352	0.169104	0.172356	0.041192	0.029268	0	0	0.08672	0.089272
		80	0.190784	0.191868	0.03022	0.031479	0.0271	0.0271	0.177776	0.182112	0.0271	0.026016	0	0	0.132264	0.097264
		160	0.202708	0.20596	0.065111	0.071569	0.055284	0.050948	0.192952	0.192952	0.062872	0.058536	0.01626	0.014092	0.117072	0.118156
		200	0.22222	0.20596	0.069235	0.074679	0.047696	0.04878	0.214632	0.202708	0.056368	0.052032	0.006504	0.011924	0.118156	0.104064
		300	0.215716	0.209712	0.102855	0.110459	0.068292	0.069376	0.218968	0.224388	0.082384	0.0813	0.050948	0.0271	0.15718	0.143088
		400	0.220052	0.201624	0.123558	0.12578	0.072628	0.078048	0.212464	0.215256	0.09756	0.089972	0.03794	0.047696	0.15176	0.147424
		Nonlinear data fit
				LdtMt2	R209E	H336A	S337A	S351A	C354A	M303A
			Michaelis-Menten						Ambiguous
			Best-fit values
			Vmax	0.2273	0.2528	0.06873	0.2325	0.11	~ 34183371862459	0.1357
			Km	16.34	428.3	39.12	23.3	123.1	~ 3.345e+017	11.71
			Std. Error
			Vmax	0.005072	0.0715	0.007946	0.005542	0.01942	~ 7.915e+027	0.006459
			Km	1.776	196.4	17.92	2.514	56.73	~ 7.744e+031	2.897
			95% CI (asymptotic)
			Vmax	0.2167 to 0.2380	0.1026 to 0.4030	0.05203 to 0.08542	0.2209 to 0.2441	0.06921 to 0.1508	(Very wide)	0.1221 to 0.1493
			Km	12.60 to 20.07	15.58 to 841.0	1.472 to 76.76	18.02 to 28.58	3.857 to 242.2	(Very wide)	5.624 to 17.80
			Goodness of Fit
			Degrees of Freedom	18	18	18	18	18	18	18
			R squared	0.9788	0.9056	0.6867	0.9818	0.7841	0.8297	0.8773
			Sum of Squares	0.002505	0.002849	0.002995	0.002342	0.003472	0.0009254	0.004863
			Sy.x	0.0118	0.01258	0.0129	0.01141	0.01389	0.00717	0.01644
			Constraints
			Km	Km > 0	Km > 0	Km > 0	Km > 0	Km > 0	Km > 0	Km > 0
			Number of points
			# of X values	20	20	20	20	20	20	20
			# Y values analyzed	20	20	20	20	20	20	20
