# Supplementary material for: Allosteric cooperation in β-lactam binding to a non-classical transpeptidase
Source: eLife. 2022 Apr 27;11:e73055. doi: 10.7554/eLife.73055 (PMC9094749; doi:10.7554/eLife.73055)
Supplement: Figure 3—source data 3. [file elife-73055-fig3-data3.xlsx]

## Sheet: Sheet1
Residues (Wild type)	Shortest Path (Wild Type)	Shortest Path (Mutant Type)
R209-C354	P209-P330-P332-P354	P209-P169-P168-P330-P332-P354
Shortest Path		P209-P170-P168-P330-P332-P354
Wild Type: 3		P209-P169-P168-P330-P333-P354
Mutant Type: 5		P209-P170-P168-P330-P333-P354
R209-303	P209-P330-P308-P303	P209-P211-P394-P293-P327-P334-P303
Shortest Path		P209-P169-P394-P293-P327-P334-P303
Wild Type: 3		P209-P393-P394-P293-P327-P334-P303
Mutant Type: 6		P209-P169-P167-P293-P327-P334-P303
		P209-P169-P168-P293-P327-P334-P303
		P209-P170-P168-P293-P327-P334-P303
		P209-P169-P168-P330-P327-P334-P303
		P209-P170-P168-P330-P327-P334-P303
		P209-P169-P168-P294-P327-P334-P303
		P209-P170-P168-P294-P327-P334-P303
		P209-P211-P394-P293-P328-P334-P303
		P209-P169-P394-P293-P328-P334-P303
		P209-P393-P394-P293-P328-P334-P303
		P209-P169-P167-P293-P328-P334-P303
		P209-P169-P168-P293-P328-P334-P303
		P209-P170-P168-P293-P328-P334-P303
		P209-P169-P168-P330-P328-P334-P303
		P209-P170-P168-P330-P328-P334-P303
		P209-P169-P168-P294-P328-P334-P303
		P209-P170-P168-P294-P328-P334-P303
		P209-P169-P168-P330-P332-P334-P303
		P209-P170-P168-P330-P332-P334-P303
		P209-P169-P168-P330-P333-P334-P303
		P209-P170-P168-P330-P333-P334-P303
		P209-P169-P168-P294-P326-P334-P303
		P209-P170-P168-P294-P326-P334-P303
		P209-P169-P168-P330-P331-P307-P303
		P209-P170-P168-P330-P331-P307-P303
		P209-P169-P168-P330-P332-P307-P303
		P209-P170-P168-P330-P332-P307-P303
		P209-P169-P168-P330-P332-P354-P303
		P209-P170-P168-P330-P332-P354-P303
		P209-P169-P168-P330-P333-P354-P303
		P209-P170-P168-P330-P333-P354-P303
R209-S337	P209-P330-P327-P335-P337	P209-P211-P394-P293-P328-P335-P337
Shortest Path	P209-P330-P328-P335-P337	P209-P169-P394-P293-P328-P335-P337
Wild Type: 4		P209-P393-P394-P293-P328-P335-P337
Mutant Type: 6		P209-P169-P167-P293-P328-P335-P337
		P209-P169-P168-P293-P328-P335-P337
		P209-P170-P168-P293-P328-P335-P337
		P209-P169-P168-P330-P328-P335-P337
		P209-P170-P168-P330-P328-P335-P337
		P209-P169-P168-P294-P328-P335-P337
		P209-P170-P168-P294-P328-P335-P337
		P209-P169-P168-P330-P333-P335-P337
		P209-P170-P168-P330-P333-P335-P337
		P209-P169-P168-P294-P326-P335-P337
		P209-P170-P168-P294-P326-P335-P337
		P209-P169-P168-P294-P365-P335-P337
		P209-P170-P168-P294-P365-P335-P337
		P209-P169-P168-P294-P326-P324-P337
		P209-P170-P168-P294-P326-P324-P337
		P209-P169-P168-P294-P365-P362-P337
		P209-P170-P168-P294-P365-P362-P337
R209-H336	P209-P330-P308-P334-P336	P209-P211-P394-P293-P327-P325-P336
Shortest Path	P209-P330-P327-P334-P336	P209-P169-P394-P293-P327-P325-P336
Wild Type: 4	P209-P330-P328-P334-P336	P209-P393-P394-P293-P327-P325-P336
Mutant Type: 7	P209-P330-P332-P334-P336	P209-P169-P167-P293-P327-P325-P336
	P209-P330-P308-P303-P336	P209-P169-P168-P293-P327-P325-P336
	P209-P330-P327-P325-P336	P209-P170-P168-P293-P327-P325-P336
	P209-P330-P327-P335-P336	P209-P169-P168-P330-P327-P325-P336
	P209-P330-P328-P335-P336	P209-P170-P168-P330-P327-P325-P336
	P209-P330-P328-P355-P336	P209-P169-P168-P294-P327-P325-P336
	P209-P330-P332-P354-P336	P209-P170-P168-P294-P327-P325-P336
		P209-P169-P158-P371-P296-P325-P336
		P209-P170-P158-P371-P296-P325-P336
		P209-P171-P158-P371-P296-P325-P336
		P209-P169-P168-P371-P296-P325-P336
		P209-P170-P168-P371-P296-P325-P336
		P209-P169-P168-P294-P296-P325-P336
		P209-P170-P168-P294-P296-P325-P336
		P209-P169-P168-P294-P326-P325-P336
		P209-P170-P168-P294-P326-P325-P336
		P209-P211-P394-P293-P327-P334-P336
		P209-P169-P394-P293-P327-P334-P336
		P209-P393-P394-P293-P327-P334-P336
		P209-P169-P167-P293-P327-P334-P336
		P209-P169-P168-P293-P327-P334-P336
		P209-P170-P168-P293-P327-P334-P336
		P209-P169-P168-P330-P327-P334-P336
		P209-P170-P168-P330-P327-P334-P336
		P209-P169-P168-P294-P327-P334-P336
		P209-P170-P168-P294-P327-P334-P336
		P209-P211-P394-P293-P328-P334-P336
		P209-P169-P394-P293-P328-P334-P336
		P209-P393-P394-P293-P328-P334-P336
		P209-P169-P167-P293-P328-P334-P336
		P209-P169-P168-P293-P328-P334-P336
		P209-P170-P168-P293-P328-P334-P336
		P209-P169-P168-P330-P328-P334-P336
		P209-P170-P168-P330-P328-P334-P336
		P209-P169-P168-P294-P328-P334-P336
		P209-P170-P168-P294-P328-P334-P336
		P209-P169-P168-P330-P332-P334-P336
		P209-P170-P168-P330-P332-P334-P336
		P209-P169-P168-P330-P333-P334-P336
		P209-P170-P168-P330-P333-P334-P336
		P209-P169-P168-P294-P326-P334-P336
		P209-P170-P168-P294-P326-P334-P336
		P209-P211-P394-P293-P328-P355-P336
		P209-P169-P394-P293-P328-P355-P336
		P209-P393-P394-P293-P328-P355-P336
		P209-P169-P167-P293-P328-P355-P336
		P209-P169-P168-P293-P328-P355-P336
		P209-P170-P168-P293-P328-P355-P336
		P209-P169-P168-P330-P328-P355-P336
		P209-P170-P168-P330-P328-P355-P336
		P209-P169-P168-P294-P328-P355-P336
		P209-P170-P168-P294-P328-P355-P336
		P209-P211-P394-P293-P328-P335-P336
		P209-P169-P394-P293-P328-P335-P336
		P209-P393-P394-P293-P328-P335-P336
		P209-P169-P167-P293-P328-P335-P336
		P209-P169-P168-P293-P328-P335-P336
		P209-P170-P168-P293-P328-P335-P336
		P209-P169-P168-P330-P328-P335-P336
		P209-P170-P168-P330-P328-P335-P336
		P209-P169-P168-P294-P328-P335-P336
		P209-P170-P168-P294-P328-P335-P336
		P209-P169-P168-P330-P333-P335-P336
		P209-P170-P168-P330-P333-P335-P336
		P209-P169-P168-P294-P326-P335-P336
		P209-P170-P168-P294-P326-P335-P336
		P209-P169-P168-P294-P365-P335-P336
		P209-P170-P168-P294-P365-P335-P336
		P209-P169-P168-P330-P332-P354-P336
		P209-P170-P168-P330-P332-P354-P336
		P209-P169-P168-P330-P333-P354-P336
		P209-P170-P168-P330-P333-P354-P336
		P209-P169-P168-P294-P326-P324-P336
		P209-P170-P168-P294-P326-P324-P336
		P209-P169-P168-P294-P365-P362-P336
		P209-P170-P168-P294-P365-P362-P336
R209-W340	P209-P330-P308-P334-P336-P340	P209-P211-P394-P293-P327-P325-P322-P340
Shortest Path	P209-P330-P327-P334-P336-P340	P209-P169-P394-P293-P327-P325-P322-P340
Wild Type: 5	P209-P330-P328-P334-P336-P340	P209-P393-P394-P293-P327-P325-P322-P340
Mutant Type: 7	P209-P330-P332-P334-P336-P340	P209-P169-P167-P293-P327-P325-P322-P340
	P209-P330-P308-P303-P336-P340	P209-P169-P168-P293-P327-P325-P322-P340
	P209-P330-P327-P325-P336-P340	P209-P170-P168-P293-P327-P325-P322-P340
	P209-P330-P327-P335-P336-P340	P209-P169-P168-P330-P327-P325-P322-P340
	P209-P330-P328-P335-P336-P340	P209-P170-P168-P330-P327-P325-P322-P340
	P209-P330-P328-P355-P336-P340	P209-P169-P168-P294-P327-P325-P322-P340
	P209-P330-P332-P354-P336-P340	P209-P170-P168-P294-P327-P325-P322-P340
	P209-P330-P308-P303-P318-P340	P209-P169-P158-P371-P296-P325-P322-P340
	P209-P330-P308-P304-P318-P340	P209-P170-P158-P371-P296-P325-P322-P340
	P209-P330-P308-P305-P318-P340	P209-P171-P158-P371-P296-P325-P322-P340
	P209-P330-P308-P303-P321-P340	P209-P169-P168-P371-P296-P325-P322-P340
	P209-P330-P327-P301-P321-P340	P209-P170-P168-P371-P296-P325-P322-P340
	P209-P330-P308-P303-P322-P340	P209-P169-P168-P294-P296-P325-P322-P340
	P209-P330-P327-P325-P322-P340	P209-P170-P168-P294-P296-P325-P322-P340
	P209-P330-P327-P301-P322-P340	P209-P169-P168-P294-P326-P325-P322-P340
	P209-P330-P327-P335-P337-P340	P209-P170-P168-P294-P326-P325-P322-P340
	P209-P330-P328-P335-P337-P340	P209-P169-P168-P294-P326-P324-P322-P340
	P209-P330-P328-P355-P356-P340	P209-P170-P168-P294-P326-P324-P322-P340
	P209-P330-P332-P354-P356-P340	P209-P211-P394-P293-P327-P325-P336-P340
		P209-P169-P394-P293-P327-P325-P336-P340
		P209-P393-P394-P293-P327-P325-P336-P340
		P209-P169-P167-P293-P327-P325-P336-P340
		P209-P169-P168-P293-P327-P325-P336-P340
		P209-P170-P168-P293-P327-P325-P336-P340
		P209-P169-P168-P330-P327-P325-P336-P340
		P209-P170-P168-P330-P327-P325-P336-P340
		P209-P169-P168-P294-P327-P325-P336-P340
		P209-P170-P168-P294-P327-P325-P336-P340
		P209-P169-P158-P371-P296-P325-P336-P340
		P209-P170-P158-P371-P296-P325-P336-P340
		P209-P171-P158-P371-P296-P325-P336-P340
		P209-P169-P168-P371-P296-P325-P336-P340
		P209-P170-P168-P371-P296-P325-P336-P340
		P209-P169-P168-P294-P296-P325-P336-P340
		P209-P170-P168-P294-P296-P325-P336-P340
		P209-P169-P168-P294-P326-P325-P336-P340
		P209-P170-P168-P294-P326-P325-P336-P340
		P209-P211-P394-P293-P327-P334-P336-P340
		P209-P169-P394-P293-P327-P334-P336-P340
		P209-P393-P394-P293-P327-P334-P336-P340
		P209-P169-P167-P293-P327-P334-P336-P340
		P209-P169-P168-P293-P327-P334-P336-P340
		P209-P170-P168-P293-P327-P334-P336-P340
		P209-P169-P168-P330-P327-P334-P336-P340
		P209-P170-P168-P330-P327-P334-P336-P340
		P209-P169-P168-P294-P327-P334-P336-P340
		P209-P170-P168-P294-P327-P334-P336-P340
		P209-P211-P394-P293-P328-P334-P336-P340
		P209-P169-P394-P293-P328-P334-P336-P340
		P209-P393-P394-P293-P328-P334-P336-P340
		P209-P169-P167-P293-P328-P334-P336-P340
		P209-P169-P168-P293-P328-P334-P336-P340
		P209-P170-P168-P293-P328-P334-P336-P340
		P209-P169-P168-P330-P328-P334-P336-P340
		P209-P170-P168-P330-P328-P334-P336-P340
		P209-P169-P168-P294-P328-P334-P336-P340
		P209-P170-P168-P294-P328-P334-P336-P340
		P209-P169-P168-P330-P332-P334-P336-P340
		P209-P170-P168-P330-P332-P334-P336-P340
		P209-P169-P168-P330-P333-P334-P336-P340
		P209-P170-P168-P330-P333-P334-P336-P340
		P209-P169-P168-P294-P326-P334-P336-P340
		P209-P170-P168-P294-P326-P334-P336-P340
		P209-P211-P394-P293-P328-P355-P336-P340
		P209-P169-P394-P293-P328-P355-P336-P340
		P209-P393-P394-P293-P328-P355-P336-P340
		P209-P169-P167-P293-P328-P355-P336-P340
		P209-P169-P168-P293-P328-P355-P336-P340
		P209-P170-P168-P293-P328-P355-P336-P340
		P209-P169-P168-P330-P328-P355-P336-P340
		P209-P170-P168-P330-P328-P355-P336-P340
		P209-P169-P168-P294-P328-P355-P336-P340
		P209-P170-P168-P294-P328-P355-P336-P340
		P209-P211-P394-P293-P328-P335-P336-P340
		P209-P169-P394-P293-P328-P335-P336-P340
		P209-P393-P394-P293-P328-P335-P336-P340
		P209-P169-P167-P293-P328-P335-P336-P340
		P209-P169-P168-P293-P328-P335-P336-P340
		P209-P170-P168-P293-P328-P335-P336-P340
		P209-P169-P168-P330-P328-P335-P336-P340
		P209-P170-P168-P330-P328-P335-P336-P340
		P209-P169-P168-P294-P328-P335-P336-P340
		P209-P170-P168-P294-P328-P335-P336-P340
		P209-P169-P168-P330-P333-P335-P336-P340
		P209-P170-P168-P330-P333-P335-P336-P340
		P209-P169-P168-P294-P326-P335-P336-P340
		P209-P170-P168-P294-P326-P335-P336-P340
		P209-P169-P168-P294-P365-P335-P336-P340
		P209-P170-P168-P294-P365-P335-P336-P340
		P209-P169-P168-P330-P332-P354-P336-P340
		P209-P170-P168-P330-P332-P354-P336-P340
		P209-P169-P168-P330-P333-P354-P336-P340
		P209-P170-P168-P330-P333-P354-P336-P340
		P209-P169-P168-P294-P326-P324-P336-P340
		P209-P170-P168-P294-P326-P324-P336-P340
		P209-P169-P168-P294-P365-P362-P336-P340
		P209-P170-P168-P294-P365-P362-P336-P340
		P209-P211-P394-P293-P328-P335-P337-P340
		P209-P169-P394-P293-P328-P335-P337-P340
		P209-P393-P394-P293-P328-P335-P337-P340
		P209-P169-P167-P293-P328-P335-P337-P340
		P209-P169-P168-P293-P328-P335-P337-P340
		P209-P170-P168-P293-P328-P335-P337-P340
		P209-P169-P168-P330-P328-P335-P337-P340
		P209-P170-P168-P330-P328-P335-P337-P340
		P209-P169-P168-P294-P328-P335-P337-P340
		P209-P170-P168-P294-P328-P335-P337-P340
		P209-P169-P168-P330-P333-P335-P337-P340
		P209-P170-P168-P330-P333-P335-P337-P340
		P209-P169-P168-P294-P326-P335-P337-P340
		P209-P170-P168-P294-P326-P335-P337-P340
		P209-P169-P168-P294-P365-P335-P337-P340
		P209-P170-P168-P294-P365-P335-P337-P340
		P209-P169-P168-P294-P326-P324-P337-P340
		P209-P170-P168-P294-P326-P324-P337-P340
		P209-P169-P168-P294-P365-P362-P337-P340
		P209-P170-P168-P294-P365-P362-P337-P340
R209 - S351	P209-P330-P328-P355-P351	P209-P211-P394-P293-P328-P355-P351
Shortest Path	P209-P330-P332-P354-P351	P209-P169-P394-P293-P328-P355-P351
Wild Type: 4		P209-P393-P394-P293-P328-P355-P351
Mutant Type: 6		P209-P169-P167-P293-P328-P355-P351
		P209-P169-P168-P293-P328-P355-P351
		P209-P170-P168-P293-P328-P355-P351
		P209-P169-P168-P330-P328-P355-P351
		P209-P170-P168-P330-P328-P355-P351
		P209-P169-P168-P294-P328-P355-P351
		P209-P170-P168-P294-P328-P355-P351
		P209-P169-P168-P330-P332-P354-P351
		P209-P170-P168-P330-P332-P354-P351
		P209-P169-P168-P330-P333-P354-P351
		P209-P170-P168-P330-P333-P354-P351

## Sheet: Sheet2
Node	Degree	Cluster_Coeff	Closeness	Betweenness	Eigenvector centrality	Eccentricity	Average neighbor degree
P146	8	0.642857	0.160025	0.003067	0.013717	10	9.875
P147	6	0.666667	0.147541	0.000311	0.008166	11	8.83333
P148	6	0.733333	0.146712	0.000183	0.008112	11	8.66667
P149	6	0.6	0.161911	0.003704	0.009228	10	9
P150	8	0.571429	0.166667	0.011016	0.016528	10	10.375
P151	9	0.5	0.176113	0.025004	0.024915	10	10.6667
P152	13	0.410256	0.196536	0.095054	0.049946	9	11.5385
P153	9	0.472222	0.204706	0.05265	0.042547	9	10.3333
P154	12	0.363636	0.213934	0.119378	0.076724	9	11.1667
P155	7	0.666667	0.234712	0.045993	0.06661	8	11
P156	12	0.378788	0.242791	0.137705	0.137994	8	11.3333
P157	10	0.444444	0.267967	0.31181	0.15711	7	11.4
P158	12	0.378788	0.267418	0.176729	0.223382	7	11.3333
P159	8	0.428571	0.22365	0.017718	0.080507	8	9
P160	6	0.533333	0.219697	0.018919	0.054916	8	8.66667
P161	4	0.666667	0.207803	0.00139	0.033712	8	7
P162	8	0.464286	0.244841	0.039536	0.126116	7	9.5
P163	6	0.6	0.235772	0.019367	0.142922	7	10.5
P164	12	0.409091	0.256385	0.059144	0.30149	7	11.6667
P165	12	0.484848	0.264975	0.040175	0.395314	7	12.9167
P166	15	0.361905	0.273872	0.262853	0.480045	7	12.6
P167	11	0.563636	0.282468	0.060139	0.421325	7	14
P168	13	0.410256	0.294915	0.2482	0.454879	6	13.9231
P169	12	0.393939	0.275026	0.086178	0.271721	7	13.4167
P170	15	0.352381	0.279743	0.253878	0.286372	7	13.6
P171	10	0.511111	0.261523	0.051092	0.147591	7	12.5
P172	14	0.373626	0.251203	0.157107	0.156121	8	12
P173	10	0.466667	0.240775	0.133029	0.081081	8	10.9
P174	16	0.325	0.232206	0.311214	0.108137	8	12.125
P175	8	0.5	0.203906	0.02805	0.037698	9	10.5
P176	8	0.607143	0.196388	0.010133	0.037612	9	11.75
P177	7	0.52381	0.194486	0.009803	0.027041	9	10.4286
P178	13	0.410256	0.215702	0.183926	0.059652	8	11.6154
P179	7	0.47619	0.18239	0.017676	0.020682	9	10.4286
P180	9	0.527778	0.188176	0.017117	0.028724	9	10.3333
P181	12	0.333333	0.210994	0.080857	0.045495	8	9
P182	6	0.8	0.189268	0.000949	0.023515	9	10
P183	10	0.488889	0.19362	0.030764	0.037043	9	10.3
P184	12	0.454545	0.222696	0.072003	0.063586	8	11.5
P185	10	0.488889	0.22365	0.084117	0.068308	8	11.3
P186	7	0.666667	0.200153	0.008796	0.03897	9	10.4286
P187	11	0.454545	0.204385	0.040843	0.062411	9	10.9091
P188	14	0.362637	0.24011	0.152772	0.124951	8	11.8571
P189	10	0.533333	0.21606	0.046433	0.087729	9	11
P190	13	0.384615	0.253644	0.19456	0.195932	8	13.0769
P191	8	0.571429	0.212023	0.017143	0.097758	9	11.375
P192	11	0.436364	0.240553	0.060508	0.15151	8	11
P193	7	0.619048	0.204225	0.004506	0.068057	9	9
P194	7	0.619048	0.200461	0.003287	0.06888	9	9
P195	5	0.6	0.198328	0.002547	0.041302	9	8.4
P196	8	0.5	0.234923	0.025033	0.10845	8	10.875
P197	9	0.583333	0.225583	0.015509	0.098632	8	10.1111
P198	9	0.611111	0.230973	0.012828	0.106679	8	10.8889
P199	10	0.533333	0.245532	0.027215	0.116187	7	12
P200	12	0.393939	0.261	0.138204	0.145896	7	13.0833
P201	12	0.393939	0.253644	0.121524	0.112131	7	11.5833
P202	15	0.390476	0.252174	0.440433	0.113226	7	11.4
P203	9	0.5	0.251203	0.114964	0.080706	7	11.1111
P204	6	0.733333	0.213584	0.002824	0.039029	8	11.3333
P205	9	0.527778	0.21606	0.038849	0.048593	8	10.3333
P206	12	0.454545	0.22617	0.060742	0.081005	8	10.9167
P207	11	0.509091	0.251203	0.109614	0.099235	7	12
P208	14	0.406593	0.267144	0.221047	0.164446	7	12.9286
P209	15	0.361905	0.29425	1	0.206116	6	12.0667
P210	16	0.35	0.27131	0.152337	0.243175	7	12.25
P211	13	0.461538	0.25996	0.043653	0.183902	7	11.9231
P212	10	0.533333	0.25024	0.021544	0.15582	7	11.6
P213	8	0.571429	0.24234	0.030301	0.118889	7	10.5
P214	5	0.8	0.241891	0.000874	0.11404	7	12.8
P215	10	0.4	0.27707	0.148456	0.306741	7	12
P216	20	0.268421	0.27707	0.406224	0.435142	7	11.8
P217	6	0.666667	0.240775	0.014443	0.129334	7	12.3333
P218	9	0.527778	0.238792	0.045326	0.2047	8	11.8889
P219	9	0.527778	0.212541	0.01927	0.124781	8	9.44444
P220	12	0.5	0.227352	0.024749	0.187171	8	10.9167
P221	11	0.509091	0.220253	0.017461	0.145126	8	10.4545
P222	14	0.450549	0.245532	0.070104	0.226771	8	12.2857
P223	10	0.555556	0.216418	0.013907	0.124937	9	11.6
P224	15	0.409524	0.240331	0.099889	0.172804	8	11.3333
P225	11	0.509091	0.220067	0.037311	0.097561	9	11.1818
P226	12	0.439394	0.214638	0.066449	0.08624	9	11.0833
P227	9	0.527778	0.202483	0.043304	0.05098	9	11
P228	14	0.373626	0.199541	0.127189	0.057107	9	10.8571
P229	8	0.607143	0.175168	0.002717	0.024652	10	9.625
P230	6	0.733333	0.168932	0.000761	0.01769	10	11.5
P231	11	0.472727	0.17731	0.024266	0.036315	10	11.3636
P232	10	0.488889	0.169481	0.008492	0.024653	10	10.7
P233	15	0.371429	0.196093	0.123727	0.052453	9	11.6
P234	8	0.607143	0.16688	0.003491	0.017541	10	10.375
P235	9	0.5	0.16688	0.012518	0.017231	10	9.66667
P236	9	0.611111	0.159829	0.00298	0.013802	10	9.11111
P237	16	0.35	0.185897	0.115453	0.039187	9	10
P238	15	0.380952	0.170923	0.082505	0.035882	10	10.1333
P239	11	0.527273	0.1707	0.005763	0.033632	10	11.3636
P240	10	0.511111	0.182773	0.020008	0.034271	10	10.7
P241	8	0.535714	0.182901	0.01074	0.031088	10	10.125
P242	8	0.5	0.183932	0.015221	0.034679	10	9.75
P243	9	0.5	0.207307	0.033917	0.069367	9	10.8889
P244	8	0.5	0.205189	0.026604	0.062364	9	10.125
P245	12	0.424242	0.231383	0.050068	0.132783	8	10.5833
P246	8	0.535714	0.212195	0.013343	0.099878	9	11.25
P247	14	0.384615	0.249761	0.087199	0.242604	8	12.2857
P248	9	0.555556	0.224034	0.017948	0.155538	8	11.5556
P249	14	0.428571	0.246925	0.093768	0.293166	8	11.5714
P250	10	0.488889	0.24011	0.039075	0.245109	7	11.4
P251	9	0.472222	0.247393	0.069367	0.244184	7	11.5556
P252	12	0.409091	0.25024	0.108444	0.316991	8	10.8333
P253	13	0.384615	0.247393	0.051969	0.41521	8	11.3846
P254	9	0.5	0.252907	0.141325	0.324489	8	12.6667
P255	12	0.424242	0.246925	0.063633	0.508057	9	12.75
P256	10	0.488889	0.236199	0.059283	0.393269	9	11.9
P257	13	0.410256	0.237705	0.06425	0.581072	9	12.5385
P258	12	0.469697	0.21896	0.031064	0.477126	10	11.6667
P259	11	0.436364	0.203113	0.023082	0.364571	10	10.5455
P260	6	0.733333	0.193908	0.002447	0.187143	10	10.3333
P261	6	0.6	0.183932	0.001436	0.195472	11	10.3333
P262	13	0.397436	0.207803	0.043203	0.490528	10	10.9231
P263	11	0.490909	0.213934	0.023648	0.465176	10	12
P264	17	0.345588	0.245532	0.169168	0.794279	9	12.8235
P265	11	0.490909	0.233244	0.047889	0.3939	9	11.4545
P266	14	0.395604	0.236413	0.070605	0.466143	9	11.4286
P267	13	0.448718	0.223842	0.044636	0.321702	9	9.76923
P268	10	0.511111	0.227948	0.051609	0.236601	8	10.3
P269	7	0.714286	0.215702	0.007625	0.149086	8	10
P270	6	0.733333	0.212714	0.00786	0.113246	9	9.5
P271	7	0.714286	0.197877	0.001225	0.140753	9	9.42857
P272	8	0.571429	0.199389	0.005918	0.193558	10	9.75
P273	8	0.571429	0.209976	0.00608	0.208364	9	10.625
P274	10	0.488889	0.216958	0.011174	0.342965	9	11.2
P275	9	0.5	0.209976	0.014746	0.33517	10	11.3333
P276	12	0.469697	0.22935	0.057499	0.552221	9	13.3333
P277	13	0.448718	0.209807	0.033149	0.604191	10	12.8462
P278	16	0.408333	0.228546	0.101316	0.763791	9	12.9375
P279	15	0.428571	0.22755	0.097146	0.69089	9	12.7333
P280	17	0.345588	0.231178	0.126559	0.771518	9	12.8235
P281	13	0.512821	0.226366	0.048641	0.485598	9	11.5385
P282	10	0.555556	0.197428	0.01946	0.305534	10	10.4
P283	7	0.571429	0.190372	0.004626	0.163116	10	9.14286
P284	4	1	0.17889	0	0.081744	11	9
P285	9	0.583333	0.20947	0.023251	0.265986	10	10.1111
P286	10	0.444444	0.2088	0.044458	0.246097	10	9.4
P287	16	0.366667	0.25048	0.187738	0.670494	9	12.375
P288	11	0.563636	0.235772	0.049246	0.359537	9	11.3636
P289	13	0.461538	0.243243	0.079966	0.425124	9	11
P290	9	0.611111	0.23923	0.014427	0.338948	9	11.7778
P291	10	0.444444	0.271592	0.12701	0.380996	8	12.4
P292	17	0.338235	0.277364	0.307162	0.72337	8	12.5294
P293	15	0.371429	0.296928	0.270901	0.650991	7	12.8667
P294	16	0.358333	0.299312	0.338283	0.740097	7	13.25
P295	8	0.535714	0.267967	0.033839	0.353134	7	12.875
P296	8	0.607143	0.265244	0.109893	0.341311	7	12.75
P297	9	0.416667	0.23923	0.018753	0.308526	8	10.4444
P298	12	0.484848	0.251688	0.05323	0.434003	8	11.4167
P299	8	0.607143	0.21606	0.006497	0.244958	9	11.125
P300	8	0.678571	0.211851	0.003807	0.213821	9	10.5
P301	12	0.484848	0.24234	0.084981	0.356395	8	10.9167
P302	7	0.666667	0.206979	0.00221	0.14425	9	10.1429
P303	14	0.351648	0.247393	0.143147	0.365372	8	10.8571
P304	8	0.535714	0.226366	0.022111	0.095962	8	9.375
P305	10	0.511111	0.226957	0.042144	0.096246	8	8.9
P306	9	0.527778	0.215881	0.042304	0.056924	8	7.88889
P307	5	0.9	0.21411	7.9e-05	0.043145	8	9
P308	12	0.333333	0.265784	0.466724	0.227835	7	9.33333
P309	6	0.733333	0.214462	0.016452	0.04067	8	8.5
P310	9	0.444444	0.217681	0.124835	0.048143	8	7.77778
P311	6	0.6	0.180748	0.014621	0.015649	9	6.83333
P312	6	0.533333	0.187231	0.01704	0.019863	9	7.33333
P313	4	0.666667	0.160025	0.000231	0.005242	10	5.75
P314	7	0.52381	0.186163	0.018262	0.016909	9	6.14286
P315	4	0.666667	0.166667	0.004315	0.010473	10	6.25
P316	6	0.533333	0.198027	0.029902	0.044377	9	7.83333
P317	8	0.428571	0.198933	0.043266	0.059125	9	8
P318	9	0.361111	0.208134	0.038335	0.122103	9	9.11111
P319	9	0.416667	0.203906	0.028375	0.095446	9	8.88889
P320	7	0.666667	0.208633	0.003967	0.137154	9	10.4286
P321	9	0.527778	0.210654	0.012912	0.192378	9	10
P322	13	0.461538	0.222696	0.029599	0.369578	9	10.6154
P323	10	0.577778	0.219512	0.006871	0.330465	9	11.5
P324	13	0.410256	0.230362	0.029785	0.493323	9	11.7692
P325	13	0.461538	0.257396	0.092067	0.529744	8	12.5385
P326	14	0.417582	0.269072	0.069528	0.641479	8	12.5714
P327	16	0.358333	0.293258	0.382895	0.654385	7	11.6875
P328	13	0.423077	0.295249	0.364022	0.69302	7	13.7692
P329	9	0.5	0.275026	0.04123	0.350455	7	11.6667
P330	7	0.47619	0.293919	0.903511	0.215781	6	11.2857
P331	6	0.533333	0.261785	0.045336	0.15858	7	9.83333
P332	8	0.571429	0.27131	0.136535	0.29848	7	11.375
P333	13	0.397436	0.262312	0.08294	0.636222	8	12.7692
P334	14	0.417582	0.259443	0.086653	0.659795	8	13.3571
P335	13	0.397436	0.262312	0.164586	0.72234	8	14.5385
P336	15	0.361905	0.238356	0.11322	0.678712	9	13
P337	12	0.409091	0.221939	0.052626	0.451893	9	11.5833
P338	10	0.533333	0.202012	0.011997	0.365716	10	11.4
P339	6	0.733333	0.18968	0.001859	0.167043	10	10.1667
P340	10	0.355556	0.202326	0.04632	0.295602	10	10.6
P341	10	0.466667	0.194052	0.020632	0.316937	10	10.2
P342	9	0.472222	0.179752	0.010394	0.243324	11	9.55556
P343	5	0.8	0.168387	0.000478	0.143595	11	10.2
P344	10	0.555556	0.194196	0.012571	0.345073	10	10.6
P345	14	0.43956	0.196388	0.033472	0.528725	10	11
P346	9	0.611111	0.19262	0.005105	0.360665	10	11.6667
P347	8	0.607143	0.190929	0.006819	0.288739	10	11
P348	10	0.6	0.196833	0.005973	0.419723	10	12.3
P349	11	0.436364	0.196536	0.019689	0.412089	10	11.5455
P350	10	0.533333	0.197727	0.021448	0.383678	10	11.9
P351	13	0.525641	0.22935	0.04855	0.580203	9	12.6154
P352	10	0.4	0.212023	0.084367	0.275668	9	10
P353	8	0.678571	0.225779	0.017748	0.382757	9	13.25
P354	14	0.384615	0.256133	0.21123	0.678013	8	13.3571
P355	18	0.30719	0.271592	0.380485	1	8	14
P356	13	0.410256	0.229148	0.070093	0.638854	9	13.3846
P357	15	0.390476	0.230565	0.078679	0.735995	9	13.2667
P358	11	0.454545	0.205512	0.025793	0.425975	10	11.6364
P359	10	0.511111	0.202169	0.021192	0.330649	10	10.5
P360	7	0.714286	0.207472	0.006383	0.241555	9	11.4286
P361	12	0.469697	0.225583	0.034406	0.466604	9	11.6667
P362	13	0.448718	0.229956	0.062137	0.506262	9	11.9231
P363	10	0.555556	0.223077	0.026994	0.362651	9	11.6
P364	14	0.384615	0.24122	0.119796	0.462984	8	10.7857
P365	16	0.291667	0.26284	0.237578	0.697538	8	12.4375
P366	12	0.454545	0.242791	0.043352	0.432812	8	11.3333
P367	8	0.678571	0.232828	0.011267	0.293266	8	11.625
P368	8	0.571429	0.244611	0.022188	0.316851	8	12.875
P369	11	0.436364	0.266871	0.18624	0.430886	7	12.6364
P370	13	0.397436	0.265244	0.092877	0.424524	7	11.5385
P371	14	0.340659	0.286184	0.508553	0.43357	6	11.1429
P372	11	0.563636	0.267418	0.012126	0.466417	7	13.3636
P373	16	0.366667	0.284314	0.194266	0.644247	7	12.75
P374	14	0.395604	0.276483	0.127084	0.59779	8	12.7143
P375	13	0.410256	0.279443	0.177208	0.671888	8	13.8462
P376	10	0.466667	0.24507	0.050241	0.438211	9	12.3
P377	14	0.406593	0.258416	0.1279	0.647816	8	12.9286
P378	11	0.490909	0.228546	0.042779	0.414301	9	11.4545
P379	9	0.527778	0.220067	0.023992	0.303278	9	10.8889
P380	11	0.509091	0.224034	0.020622	0.381509	9	11.4545
P381	7	0.428571	0.193908	0.007167	0.159963	10	9.28571
P382	8	0.678571	0.212023	0.006891	0.220337	10	10.5
P383	9	0.611111	0.222128	0.036383	0.240271	9	10.4444
P384	7	0.619048	0.212368	0.011489	0.160538	9	9.85714
P385	11	0.418182	0.245532	0.118644	0.259097	8	10.2727
P386	8	0.571429	0.224613	0.021796	0.082764	8	8.625
P387	7	0.619048	0.222886	0.011089	0.064294	8	8.85714
P388	8	0.607143	0.221562	0.014559	0.060013	7	9.125
P389	6	0.666667	0.231794	0.005206	0.048722	7	9
P390	8	0.642857	0.232413	0.005544	0.0676	7	8.75
P391	10	0.311111	0.268243	0.155677	0.173813	7	9.3
P392	6	0.733333	0.246925	0.004342	0.086467	7	11.5
P393	10	0.4	0.267418	0.159819	0.1494	7	12.1
P394	16	0.3	0.286813	0.264109	0.35162	7	11.375
P395	12	0.409091	0.262312	0.141072	0.158899	7	9.66667
P396	13	0.371795	0.254386	0.105895	0.136068	7	10.5385
P397	9	0.472222	0.244841	0.060547	0.094284	7	11
P398	12	0.439394	0.222696	0.017829	0.108951	8	9.91667
P399	6	0.8	0.216239	0.002329	0.040834	8	9.83333
P400	10	0.511111	0.223459	0.026704	0.067378	8	9.5
P401	15	0.380952	0.252174	0.1357	0.143135	7	10.5333
P402	7	0.666667	0.206161	0.001317	0.04535	8	9.42857
P403	6	0.666667	0.210314	0.005482	0.030807	8	8.83333
P404	7	0.52381	0.210994	0.024685	0.036807	8	8.71429
P405	8	0.321429	0.213759	0.068441	0.036109	8	8.375
P406	3	0.666667	0.18	0.000501	0.006691	9	6
P407	3	0.666667	0.181502	0.002299	0.007359	9	7.66667
