# Supplementary material for: Allosteric cooperation in β-lactam binding to a non-classical transpeptidase
Source: eLife. 2022 Apr 27;11:e73055. doi: 10.7554/eLife.73055 (PMC9094749; doi:10.7554/eLife.73055)
Supplement: Figure 4—source data 1. [file elife-73055-fig4-data1.xlsx]

## Sheet: Sheet1
		Raw data analyis for Biapenem acylation assay (Figure 4A
		Time (min)	Wild-type		S351A		R209E		H352N		C354A		H336N
		0	0.115	0.111	0.141	0.129	0.136	0.089	0.115	0.117	0.115	0.115	0.142	0.121
		0.5	0.073	0.061	0.124	0.123	0.153	0.084	0.104	0.074	0.116	0.116	0.14	0.123
		1	0.062	0.049	0.119	0.121	0.139	0.086	0.093	0.064	0.117	0.117	0.141	0.115
		1.5	0.058	0.042	0.12	0.109	0.143	0.088	0.085	0.055	0.118	0.118	0.141	0.113
		2	0.047	0.033	0.117	0.114	0.146	0.079	0.085	0.051	0.117	0.117	0.144	0.113
		2.5	0.044	0.029	0.115	0.114	0.141	0.083	0.078	0.045	0.118	0.118	0.14	0.113
		3	0.04	0.024	0.114	0.113	0.147	0.077	0.075	0.045	0.118	0.118	0.14	0.119
		3.5	0.039	0.021	0.113	0.115	0.15	0.075	0.074	0.045	0.119	0.119	0.138	0.112
		4	0.031	0.019	0.115	0.117	0.146	0.076	0.07	0.044	0.116	0.116	0.137	0.112
		4.5	0.031	0.014	0.111	0.115	0.15	0.076	0.069	0.044	0.116	0.116	0.137	0.115
		5	0.024	0.016	0.11	0.114	0.151	0.072	0.069	0.039	0.119	0.119	0.137	0.115
		5.5	0.022	0.015	0.111	0.116	0.141	0.072	0.064	0.038	0.117	0.117	0.137	0.109
		6	0.023	0.009	0.11	0.114	0.138	0.075	0.066	0.039	0.117	0.117	0.139	0.103
		6.5	0.022	0.01	0.109	0.113	0.137	0.07	0.065	0.033	0.115	0.115	0.132	0.095
		7	0.023	0.01	0.109	0.11	0.135	0.069	0.066	0.042	0.118	0.118	0.13	0.117
		7.5	0.018	0.005	0.109	0.11	0.125	0.075	0.064	0.037	0.118	0.118	0.141	0.114
		8	0.017	0.007	0.107	0.111	0.131	0.072	0.06	0.038	0.117	0.117	0.133	0.116
		Raw Data on rate Biapenem acylation (Kobs [50µM] (Figure 4B)
			Wild-type		C354A		H352N		H336N		R209E		S351A
			0.068	0.078	-0.0005	0.007	0.03	0.066	-0.002	0.008	-0.01	0.01	0.009	0.003
