# Supplementary material for: Allosteric cooperation in β-lactam binding to a non-classical transpeptidase
Source: eLife. 2022 Apr 27;11:e73055. doi: 10.7554/eLife.73055 (PMC9094749; doi:10.7554/eLife.73055)
Supplement: Figure 4—source data 2. [file elife-73055-fig4-data2.xlsx]

## Sheet: Sheet1
	Raw data on ∆Tm for Biapenem binding with wild-type and mutants (Figure 4C)
		Bia Concentration	Wild-type		R209E		E207A		Y330F		C354A		S351A		H336N
		0	0	0	0	0	0	0	0	0	0	0	0	0	0	0
		6.25	0.673	0.7	0.22	0.24	0.68	0.596	0.597	0.797	0.155	0.116	0.039	0.007	0.015	0.015
		25	1.643	1.807	0.22	0.24	0.761	0.632	1.211	1.485	0.267	0.176	0.281	0.199	0.015	0.103
		100	1.81	2.07	0.338	0.328	1.14	1.263	1.51	1.803	0.267	0.2	0.219	0.399	0.2	0.23
		400	2.1	2.353	0.547	0.549	1.18	1.276	1.535	1.8	0.497	0.238	0.402	0.67	0.254	0.196
	Raw data from ThermoFluor assay for Biapenem binding with wild-type and mutants (Figure 4D)
	WILD-TYPE
		Temperature	0 µM	6.25 μM	12.5 µM	25 μM	50 µM	100 μM	200 µM	400 μM
		25	0.7	2.37	1.67	2.94	1.98	1.48	1.74	-0.43
		25.5	1.52	5.12	3.61	6.37	4.28	3.21	3.76	-0.93
		26	1.41	4.73	3.33	5.88	3.96	2.97	3.47	-0.86
		26.5	1.41	4.73	3.33	5.88	3.96	2.97	3.47	-0.86
		27	1.41	4.73	3.33	5.88	3.96	2.97	3.47	-0.86
		27.5	1.4	4.77	3.38	5.92	3.92	2.95	3.39	-0.84
		28	1.34	4.48	3.04	5.7	4.14	3.06	3.91	-0.98
		28.5	1.95	4.23	2.92	5.29	4.45	3.08	4.93	-0.84
		29	2.93	4.4	3.52	5.12	4.77	2.65	5.44	0.15
		29.5	3.83	4.92	3.9	5.66	5.48	2.98	6.31	1.7
		30	5.48	5.49	4	6.31	5.7	3.38	7.13	2.99
		30.5	7.13	5.89	4.28	6.32	4.96	2.93	6.69	4.07
		31	7.84	6.11	4.03	5.83	3.98	2.61	5.83	5.63
		31.5	8.22	5.62	3.03	5.27	3.07	2.2	5.31	6.43
		32	8.4	4.33	2.19	4.36	2.1	1.21	4.31	6.51
		32.5	7.49	3.62	1.36	3.01	1.02	0.44	3.05	6.8
		33	6.54	3.44	0.2	1.89	0.09	-0.61	2.45	6.5
		33.5	6.19	2.42	-0.76	1.05	-0.8	-2.15	2.01	5.23
		34	5.77	1.62	-1.64	0.19	-1.76	-2.87	1.1	3.93
		34.5	4.65	1.66	-2.47	-0.78	-2.77	-3.45	0.04	2.64
		35	3.8	1.02	-2.78	-1.44	-3.09	-4.5	-1	1.23
		35.5	3.03	-0.31	-3.13	-1.86	-2.93	-4.74	-2.35	0.34
		36	1.58	-0.92	-3.56	-2.3	-3.07	-4.68	-3.74	-0.39
		36.5	0.13	-1.31	-3.71	-2.85	-3.45	-5.54	-4.75	-1.15
		37	-0.7	-2.16	-4.31	-3.31	-4.06	-6.88	-6.08	-2.36
		37.5	-1.43	-2.64	-5.81	-4.18	-5.16	-8.27	-8.01	-4.6
		38	-2.4	-3.03	-7.4	-5.48	-6.87	-10.42	-9.91	-7.34
		38.5	-3.44	-3.93	-9.18	-7.56	-8.96	-14.11	-12.72	-10.73
		39	-4.85	-5.61	-12.01	-11.01	-12.19	-18.94	-17.53	-15.26
		39.5	-6.56	-8.02	-15.84	-15.48	-16.94	-24.88	-23.54	-20.91
		40	-9.07	-11.37	-21.16	-21.03	-23.33	-33.08	-30.66	-27.74
		40.5	-12.85	-16.05	-28.51	-28.77	-31.38	-43.39	-39.71	-35.74
		41	-17.97	-21.91	-37.87	-37.67	-40.74	-53.99	-49.71	-44.31
		41.5	-24.5	-28.38	-48.07	-46.31	-49.8	-64.3	-58.22	-52.32
		42	-33.1	-35.6	-58.04	-54.83	-57.34	-73.43	-64.43	-58.5
		42.5	-43.51	-43.3	-66.53	-61.86	-62.86	-79.22	-68.4	-61.55
		43	-54.08	-49.64	-72.27	-65.34	-65.53	-80.6	-68.88	-61.38
		43.5	-63.73	-54.58	-74.46	-65.05	-64.25	-78.12	-65.02	-57.62
		44	-72.06	-57.97	-73.43	-62.01	-60.05	-72.08	-58.77	-51.36
		44.5	-77.55	-58.66	-69.52	-56.33	-53.89	-63.1	-51.53	-43.41
		45	-78.92	-56.61	-63.2	-48.84	-45.88	-52.91	-42.61	-34.85
		45.5	-76.47	-52.85	-55.56	-40.76	-37.13	-42.65	-33.13	-26.74
		46	-70.55	-46.79	-47.08	-33.15	-28.96	-32.35	-24.93	-19.31
		46.5	-61.34	-39.11	-38.38	-25.5	-21.25	-22.88	-17.65	-12.41
		47	-50.08	-31.36	-29.76	-18.12	-14.21	-15.01	-10.69	-6.46
		47.5	-38.15	-23.19	-21.55	-11.56	-8.74	-8.26	-5.23	-1.43
		48	-26.84	-15.27	-14.15	-5.62	-3.94	-2.89	-1.03	2.76
		48.5	-17.19	-9.04	-7.74	-0.41	0.27	0.93	2.51	5.82
		49	-9.27	-3.84	-1.98	3.57	3.52	3.78	5.45	8.39
		49.5	-3.19	1.07	2.49	6.67	6.04	5.97	7.38	10.2
		50	1.11	4.34	5.66	9.08	8.63	7.74	9.17	11.26
		50.5	4.21	6.83	8.24	10.58	10.62	9.71	10.93	12.57
		51	6.86	9.64	10.25	12.14	11.91	11.35	12.5	13.99
		51.5	8.9	11.52	11.41	13.5	12.88	12.53	13.96	14.78
		52	10.38	12.72	12.33	13.97	13.72	14.08	15.27	15.73
		52.5	11.72	14.16	13.33	14.61	14.35	15.45	15.97	16.82
		53	13.11	15.31	14.16	15.24	15.08	15.79	16.05	17.55
		53.5	14.3	15.67	14.69	15.19	15.92	16.23	16.05	17.71
		54	15.06	15.93	15.29	15.5	16.48	17.01	15.79	17.6
		54.5	15.68	15.99	15.9	16.54	16.66	16.97	15.85	17.4
		55	16.29	16.09	16.18	16.96	16.63	16.75	16.26	17.4
		55.5	16.7	16.02	16.29	17.26	15.97	17.3	16.82	17.17
		56	16.59	15.5	16.55	17.79	15.06	17.67	17.08	17.08
		56.5	16.33	15.32	16.62	17.64	14.98	17.74	17.28	17.6
		57	16.33	15.49	16.72	17.09	15.45	18.17	17.09	17.76
		57.5	16.06	15.25	17.33	16.93	15.71	18.66	16.54	17.3
		58	15.36	15.06	17.84	17.15	16.46	18.96	16.01	17.13
		58.5	15.14	15.73	18.02	17.15	17.6	19.11	15.67	17
		59	15.3	16.39	18.15	17.29	17.76	19.29	15.51	16.25
		59.5	15.21	16.39	18.03	17.7	17.5	19.61	15.61	15.96
		60	15.28	16.12	17.23	17.83	17.6	19.46	16.01	15.96
		60.5	15.82	16.1	16.77	17.4	17.26	19.13	16.32	15.53
		61	16.1	15.84	16.79	17.14	16.53	19.25	16.75	15.54
		61.5	16.14	15.26	16.81	17.15	16.07	19.44	16.96	15.8
		62	16.11	15.25	17.28	17.07	15.77	19.38	16.74	15.57
		62.5	15.84	15.65	18.31	16.85	15.57	19.79	16.77	15.57
		63	15.29	15.69	18.74	16.9	15.53	20.4	16.77	15.9
		63.5	14.8	14.91	18.37	16.52	15.84	20.44	16.98	15.28
		64	14.48	14.8	18.66	16.16	16.06	20.68	17.29	15.09
		64.5	15.42	14.23	19.11	16.33	17.98	22.17	19.9	15.31
		65	7.1	5.54	8.14	7.02	8.45	10.06	9.73	6.39
	R209E
		Temperature	0 µM	6.25 μM	12.5 µM	25 μM	50 µM	100 μM	200 µM	400 μM
		25	0.6	3.63	2.28	4.11	1.26	1.08	0.49	-3.88
		25.5	1.3	7.86	4.94	8.91	2.74	2.35	1.06	-8.4
		26	1.2	7.25	4.56	8.22	2.53	2.17	0.98	-7.75
		26.5	1.2	7.25	4.56	8.22	2.53	2.17	0.98	-7.75
		27	1.2	7.25	4.56	8.22	2.53	2.17	0.98	-7.75
		27.5	1.2	7.24	4.52	8.49	2.5	2.19	0.95	-7.76
		28	1.2	7.29	4.72	6.74	2.61	2.04	1.05	-7.67
		28.5	0.93	7.75	5.24	4.04	3.21	1.84	2.01	-7.98
		29	1.52	8.08	5.6	2.46	3.89	2.17	3.32	-7.8
		29.5	2.71	7.81	5.57	0.83	4.24	2.63	3.54	-6.81
		30	3.52	7.46	5.41	-0.51	4.06	2.59	3.55	-5.36
		30.5	5.15	7.27	4.55	-1.86	3.13	2.42	4.1	-2.36
		31	6.78	6.53	3.18	-3.55	2.06	2.01	4.65	1.52
		31.5	7.13	5.16	1.77	-5.04	1.18	1.83	5.06	5.27
		32	6.76	3.72	0.13	-5.8	0.21	1.5	5.95	8.49
		32.5	6.26	2.57	-1	-5.94	-0.48	0.55	6.22	10.56
		33	5.47	1.75	-1.55	-5.29	-0.9	-0.3	5.45	10.47
		33.5	4.74	0.89	-2.3	-4.79	-2	-1.03	3.93	9.14
		34	4.09	0.12	-4.03	-4.8	-3.38	-2.72	1.36	6.84
		34.5	2.85	-0.46	-6.01	-5.12	-4.76	-4.94	-1.38	3.54
		35	1.28	-1.8	-8.48	-5.93	-6.56	-6.76	-3.89	-0.33
		35.5	-0.91	-4.22	-11.91	-7.57	-8.63	-8.85	-6.19	-4.32
		36	-3.85	-6.58	-15.31	-9.62	-10.71	-11.46	-8.78	-8.18
		36.5	-6.85	-9.18	-17.31	-11.69	-13.37	-14.2	-11.32	-11.65
		37	-9.57	-12.39	-19.15	-14.34	-17.11	-17.16	-14.71	-14.85
		37.5	-12.74	-15.51	-21.83	-17.58	-21.8	-20.83	-18.78	-17.95
		38	-16.22	-18.67	-24.41	-20.93	-26.39	-24.76	-22.78	-20.57
		38.5	-19.49	-22.36	-27.49	-24.32	-30.76	-28.75	-26.77	-23.5
		39	-22.73	-25.75	-31.52	-27.49	-35.21	-32.36	-30.61	-26.94
		39.5	-26.02	-28.92	-35.56	-30.32	-38.5	-35.44	-33.34	-29.75
		40	-28.6	-31.92	-39.03	-32.58	-40.4	-37.97	-34.91	-31.23
		40.5	-30.17	-33.74	-41.61	-33.63	-41.83	-39.46	-36	-32.13
		41	-30.87	-33.86	-42.2	-33.4	-42.41	-39.35	-35.41	-31.57
		41.5	-30.41	-32.75	-41.1	-32.68	-41.04	-37.65	-33	-29.48
		42	-28.47	-30.35	-38.46	-30.66	-38.14	-34.59	-29.9	-26.89
		42.5	-25.31	-26.27	-33.66	-27.14	-33.9	-30.37	-25.9	-23.75
		43	-21.58	-21.2	-27.71	-23.72	-28.62	-25.81	-21.02	-20
		43.5	-17.57	-16.21	-22.12	-20.06	-22.51	-21.06	-16.54	-16.13
		44	-13.3	-11.87	-16.88	-15.65	-16.55	-16.69	-12.9	-12.09
		44.5	-9.8	-7.63	-11.77	-11.71	-11.8	-12.85	-9.24	-7.65
		45	-7.1	-3.91	-7.66	-9.24	-8	-8.86	-5.99	-3.83
		45.5	-4.14	-1.14	-4.64	-6.86	-4.57	-4.69	-3.33	-0.49
		46	-1.56	1.22	-1.65	-4.82	-2.23	-1.29	-0.95	2.42
		46.5	0.47	3.73	1.33	-3.63	-0.5	1.33	1.4	4.65
		47	2.83	5.56	3.56	-2.52	1.64	3.85	3.83	6.13
		47.5	5	6.65	5.42	-0.53	3.58	5.87	5.63	7.51
		48	6.04	7.88	7.27	1.2	5.03	6.98	6.98	8.9
		48.5	7.07	9.05	8.36	2.53	6.93	7.74	8.6	10.04
		49	7.86	9.88	9.05	3.87	8.78	9.11	10.18	11.32
		49.5	8.46	10.95	10.11	4.76	10.03	10.32	10.59	12.36
		50	8.94	12.14	10.92	5.21	11.03	10.9	11.21	13.02
		50.5	9.33	12.82	11.43	5.6	11.85	11.87	12.57	13.65
		51	9.96	13.29	12.25	6.11	12.42	13.19	13.41	14.38
		51.5	10.65	13.49	12.84	6.58	12.6	13.66	13.71	14.8
		52	10.71	13.8	13.09	7.25	12.85	13.78	14.77	15.38
		52.5	10.8	14.08	13.38	7.8	13.32	14.19	15.68	16.22
		53	11.32	14.17	13.69	8.5	13.75	14.42	15.42	16.89
		53.5	11.38	14.39	14.39	9.05	13.92	14.53	15.56	17.23
		54	11.14	14.96	15.71	9.6	14.6	15.07	16.31	17.35
		54.5	11.19	14.98	16.57	10.4	15.22	15.84	16.48	17.37
		55	11.63	14.77	17.02	11.06	15.61	16.38	16.47	17.27
		55.5	11.99	14.98	17.63	11.37	16.16	16.78	17.26	16.95
		56	11.99	15.12	17.61	11.68	16.74	17.14	17.55	17.11
		56.5	12.14	15.29	16.61	11.95	16.82	17.25	17.34	17.81
		57	12.74	15.3	15.76	11.89	17	17.18	17.58	18.42
		57.5	12.83	15.42	15.72	11.99	17.2	17.28	17.67	19.2
		58	12.67	15.91	15.9	12.56	17.27	17.26	17.34	19.78
		58.5	13.17	16.18	15.82	13.01	17.19	16.97	17.04	19.71
		59	13.94	16.05	15.85	12.99	16.86	16.91	16.96	19.62
		59.5	14.01	16.29	16.05	12.96	16.39	16.64	16.43	19.52
		60	13.73	16.55	15.9	13	16.18	16.13	15.92	18.8
		60.5	13.86	16.13	15.42	12.77	15.85	16	15.62	18.59
		61	13.78	15.5	15.13	12.63	15.71	16.16	15.75	18.71
		61.5	13	15.14	15.41	12.96	16.6	16.17	15.73	18.05
		62	12.56	14.9	15.78	13.5	17.47	16.69	15.7	17.58
		62.5	12.89	14.74	15.62	14.04	17.94	17.56	16.37	17.65
		63	12.77	14.93	15.58	14.27	18.64	17.91	16.81	17.35
		63.5	12.64	15.85	15.22	14.88	19.31	17.81	16.81	16.97
		64	13.03	16.31	14.71	15.3	19.2	17.99	17.12	17.11
		64.5	14.49	18.88	14.48	17.37	20.91	18.66	18.81	18.43
		65	6.76	9.32	6.06	8.44	9.76	8.08	8.61	8.4
	E207A
		Temperature	0 µM	6.25 μM	12.5 µM	25 μM	50 µM	100 μM	200 µM	400 μM
		25	0.11	-0.18	0.73	0.99	2.1	0.56	1.14	0.35
		25.5	0.24	-0.39	1.58	2.14	4.54	1.22	2.47	0.75
		26	0.22	-0.36	1.46	1.98	4.19	1.12	2.28	0.69
		26.5	0.22	-0.36	1.46	1.98	4.19	1.12	2.28	0.69
		27	0.22	-0.36	1.46	1.98	4.19	1.12	2.28	0.69
		27.5	0.22	-0.42	1.37	1.97	4.21	1.12	2.21	0.64
		28	0.18	-0.04	1.87	1.99	4.04	1.17	2.6	0.89
		28.5	0.28	0.54	2.89	2.14	3.8	1	3.86	1.73
		29	1.06	1.14	3.51	2.72	4.22	1.31	5.7	2.91
		29.5	2.03	1.77	4.24	3.37	5.15	1.82	7.41	4.12
		30	2.82	2.36	5.36	4.12	6.37	2.2	8.82	5.59
		30.5	4.24	3.15	6.29	4.82	7.35	2.67	10.31	7.18
		31	5.73	3.83	6.68	5.33	8.13	3.48	10.85	8.24
		31.5	6.5	4.34	7.01	5.61	8.44	4.31	10.3	9.21
		32	7.26	5.12	7.18	5.58	7.92	5.21	9.71	10
		32.5	7.92	5.64	6.67	5.34	7.12	5.78	8.86	9.68
		33	7.7	5.52	5.53	4.85	6.35	5.42	7.07	8.83
		33.5	6.74	5.27	4.28	4.2	5.04	4.9	5.71	7.68
		34	5.55	4.47	2.77	3.36	3.26	4.06	4.58	5.57
		34.5	4.3	2.52	1.05	2.35	1.93	2.22	2.87	3.42
		35	2.81	0.5	-0.15	1.17	0.63	0.43	1.82	2.05
		35.5	1.02	-1.31	-0.97	-0.05	-0.62	-0.32	1.05	0.14
		36	-0.28	-3.26	-1.48	-1.18	-1.15	-1.47	-0.36	-1.28
		36.5	-1.05	-4.52	-1.78	-2.08	-1.36	-3.05	-1.48	-1.35
		37	-2.05	-5.11	-2.47	-2.98	-2.39	-4.04	-2.25	-1.78
		37.5	-3.06	-6.02	-3.76	-3.96	-3.75	-5.02	-3.6	-2.59
		38	-3.92	-7.11	-5.17	-5.27	-5	-6.57	-4.99	-2.67
		38.5	-5.32	-8.15	-7.08	-6.9	-7.05	-8.46	-6.28	-3.31
		39	-7.43	-10.13	-9.42	-9.26	-9.67	-10.53	-8.12	-5.16
		39.5	-10.02	-12.4	-11.73	-11.96	-11.71	-12.81	-10.48	-7.44
		40	-12.93	-14.42	-14.19	-14.97	-14.33	-15.9	-13.41	-10.37
		40.5	-15.88	-17.35	-16.96	-18.36	-18.26	-19.86	-16.73	-13.58
		41	-19.03	-21.01	-19.87	-22.05	-21.99	-23.66	-19.96	-17.13
		41.5	-22.56	-23.98	-23.06	-25.5	-25.12	-26.97	-23.35	-20.55
		42	-25.77	-26.89	-26.05	-28.79	-28.48	-30.32	-26.41	-23.19
		42.5	-28.31	-29.94	-28.21	-31.6	-30.5	-32.63	-28.46	-24.43
		43	-30.47	-31.36	-29.9	-32.94	-30.35	-32.89	-29.41	-24.8
		43.5	-32.15	-31.14	-30.8	-33.21	-29.18	-32.22	-29.26	-24.05
		44	-32.67	-30.54	-29.97	-32.51	-27.29	-31.1	-27.28	-22.05
		44.5	-31.98	-28.88	-28.23	-30.15	-24.25	-28.56	-24.14	-19.33
		45	-31.02	-26.52	-26.35	-26.87	-21.1	-25.1	-20.52	-16.6
		45.5	-29.68	-24.26	-23.75	-23.92	-18.32	-22.01	-16.61	-13.71
		46	-26.78	-21.87	-20.85	-20.62	-15.51	-18.26	-13.11	-10.48
		46.5	-23.31	-19.14	-18.63	-16.8	-13.29	-13.78	-10.49	-7.91
		47	-20.48	-16.55	-16.24	-13.62	-11.41	-9.87	-8.41	-5.61
		47.5	-17.08	-13.48	-13.38	-11	-9.19	-7.02	-6.48	-3.48
		48	-13.28	-10.17	-10.67	-8.2	-7.41	-4.43	-4.9	-2.33
		48.5	-10.48	-7.3	-7.94	-5.74	-5.79	-2.52	-3.14	-1.85
		49	-7.95	-4.56	-5.37	-4.28	-3.63	-1.61	-1.37	-0.64
		49.5	-5.25	-2.08	-3.5	-3.31	-1.9	-1.16	0.22	0.39
		50	-3.22	-0.07	-2.03	-1.83	-0.96	-0.17	1.37	0.85
		50.5	-1.4	1.49	-0.68	-0.62	0.27	1.18	2.13	1.82
		51	0.32	2.65	0.15	0.34	1.38	2.06	2.85	3.15
		51.5	1.53	3.53	1.09	1.69	1.92	3.45	3.57	3.42
		52	2.77	4.48	2.21	2.96	2.66	5.1	4.19	3.77
		52.5	3.78	5.03	2.92	3.32	3.64	6.01	4.71	4.95
		53	4.35	5.52	2.95	3.75	4.38	6.24	5.38	5.66
		53.5	5.31	6.67	3.28	4.35	4.68	6.84	5.67	5.9
		54	6.43	8.11	4.26	4.4	5.15	7.08	5.52	6.48
		54.5	7.36	9.19	5.17	4.52	5.31	7.35	5.59	6.42
		55	8.55	10.48	6.13	5.07	5.31	7.93	5.99	5.63
		55.5	9.43	11.51	7.75	5.5	5.5	8.66	6.49	5.4
		56	9.64	11.74	9.08	5.69	5.83	9.42	7.04	5.45
		56.5	9.67	11.95	9.35	6.3	6.24	10.03	7.74	5.75
		57	9.6	12.38	9.51	6.93	6.93	10.12	8.41	6.46
		57.5	9.39	12.56	9.69	7.27	7.46	10.21	8.94	7.13
		58	9.65	13.47	9.73	7.99	7.61	10.51	8.98	7.63
		58.5	10.03	14.65	9.98	8.84	8.03	10.07	8.94	7.84
		59	10.6	14.84	10.32	9.4	8.31	9.71	8.86	7.64
		59.5	11.26	15	11.13	10.15	8.34	10.07	8.7	7.52
		60	11.95	15.6	12.3	11.07	8.47	10.54	8.62	7.61
		60.5	12.48	15.67	13.05	11.51	8.87	10.63	8.72	7.65
		61	12.58	15.8	13.32	11.86	9.13	11.47	8.83	7.77
		61.5	12.62	16.5	13.7	12.3	9.36	12.42	9.47	7.79
		62	12.68	17.05	13.65	12.56	9.74	12.73	9.82	7.67
		62.5	12.54	17.23	13.17	12.96	10.05	12.88	9.72	7.66
		63	12.56	17.26	13.08	13.04	10.26	13.04	10.26	7.54
		63.5	13.37	17.37	12.99	13.66	10.3	12.71	10.71	8.07
		64	13.54	17.27	13.05	14.08	10.36	12.35	10.71	8.34
		64.5	15.59	18.96	13.69	16.55	11.05	12.82	11.76	10.52
		65	7.65	8.89	6.08	8.29	5.03	5.58	5.62	5.59
	Y330F
		Temperature	0 µM	6.25 μM	12.5 µM	25 μM	50 µM	100 μM	200 µM	400 μM
		25	0.39	1.51	1.93	0.85	0.71	-1.76	2.02	0.29
		25.5	0.84	3.27	4.18	1.83	1.54	-3.81	4.38	0.64
		26	0.78	3.01	3.85	1.69	1.42	-3.52	4.04	0.59
		26.5	0.78	3.01	3.85	1.69	1.42	-3.52	4.04	0.59
		27	0.78	3.01	3.85	1.69	1.42	-3.52	4.04	0.59
		27.5	0.75	2.94	3.88	1.7	1.36	-3.55	4.01	0.43
		28	0.83	3.4	3.75	1.62	1.73	-3.45	4.15	1.33
		28.5	1.4	4.07	3.39	1.75	2.4	-2.76	5	3.52
		29	2.49	4.5	3.68	2.16	3.24	-1.35	6.08	6.11
		29.5	3.96	5.35	4.37	2.48	4.49	-0.48	7.82	9.24
		30	5.6	6.21	4.94	2.52	5.68	0.1	10.04	12.37
		30.5	7.07	6.38	5.3	2.48	5.92	0.72	11.04	14.28
		31	8.15	6.06	5.32	2.21	5.33	0.33	10.94	15.31
		31.5	8.9	5.77	4.72	1.65	4.74	-0.88	10.58	15.46
		32	9.02	4.48	3.2	0.56	3.54	-1.68	9.12	13.89
		32.5	8.43	2.88	1.46	-0.41	1.56	-2.87	6.47	11.3
		33	7.42	1.41	-0.35	-1.63	-0.3	-4.92	3.93	9.04
		33.5	6.01	-0.24	-2.64	-3.42	-2.98	-6.98	1.21	6.6
		34	4.42	-2.01	-4.89	-5.51	-6.52	-9.75	-2.67	3.4
		34.5	2.57	-3.74	-6.92	-7.93	-10.42	-14.15	-6.96	0.74
		35	0.26	-5.74	-9.48	-10.99	-15.36	-20.04	-11.93	-1.55
		35.5	-1.88	-8.07	-12.75	-14.75	-21.45	-27.23	-18.04	-4.51
		36	-3.72	-10.39	-16.65	-19.12	-28.28	-36.04	-25.48	-8
		36.5	-6	-13.8	-22.4	-25.2	-37.8	-47.39	-35.32	-11.74
		37	-8.13	-18.61	-30.38	-33.44	-50.64	-61.85	-48.15	-16.92
		37.5	-10.61	-24.8	-40.96	-44.4	-65.91	-78.99	-63.3	-24.03
		38	-14.89	-33.04	-55.03	-58.4	-83.67	-98.49	-80.15	-32.11
		38.5	-21.43	-44.36	-72.19	-74.68	-102.52	-118.89	-97.67	-40.55
		39	-30.39	-57.1	-90.43	-91.1	-119.02	-136.31	-112.32	-48.69
		39.5	-42.57	-70.21	-108.49	-106.02	-130.4	-148.21	-122.26	-55.27
		40	-57.78	-83.39	-124	-116.83	-135.66	-153.07	-126.1	-58.56
		40.5	-73.88	-94.39	-133.83	-121.6	-133.78	-149.05	-122.94	-58.26
		41	-88.74	-100.7	-136.87	-120.13	-125.06	-137.14	-113.19	-55.26
		41.5	-100.15	-102.07	-133.08	-112.62	-110.91	-120.74	-99.01	-49.26
		42	-105.62	-98.22	-122.39	-99.93	-94	-101.59	-82.18	-40.77
		42.5	-102.79	-88.45	-106.33	-84.2	-75.43	-80.64	-64.48	-31.79
		43	-92.32	-74.56	-87.37	-66.77	-56.86	-60.81	-47.85	-23.35
		43.5	-76.62	-58.82	-67.08	-49.44	-39.72	-43.58	-32.95	-14.84
		44	-58.19	-42.73	-47.62	-34.43	-24.84	-28.17	-20.29	-7.86
		44.5	-39.53	-27.33	-30.68	-21.1	-12.31	-14.79	-9.82	-2.71
		45	-23.7	-14.56	-16.79	-9.77	-2.57	-5.06	-1.9	1.66
		45.5	-12.12	-4.83	-5.87	-1.64	4.72	1.92	3.66	4.87
		46	-3.85	2.71	2.2	4.23	10.14	7.67	7.62	6.88
		46.5	1.82	7.84	7.85	9.41	13.98	11.95	10.75	8.61
		47	5.1	10.68	11.89	13.09	17.11	15.21	13.03	9.68
		47.5	7.24	12.46	14.71	15.2	19.49	18.41	14.81	10.06
		48	9.67	13.88	16.71	17.07	21.56	21.02	16.89	10.89
		48.5	11.41	14.81	17.89	18.9	23.53	23.01	18.24	11.12
		49	12.32	15.86	18.87	20.01	25.12	24.76	18.75	10.84
		49.5	13.25	16.86	19.87	20.11	25.91	25.65	19.05	11.42
		50	13.97	17.79	20.42	20.34	26.71	26.18	19.33	11.93
		50.5	13.5	18.55	20.75	20.61	27.12	27.44	19.61	11.8
		51	13.19	18.79	21.42	20.81	27.23	28.78	20.51	12.23
		51.5	13.66	18.91	22.1	21.15	27.86	29.45	21.62	12.79
		52	14.35	19.5	22.17	21.85	28.84	30.47	22.56	12.84
		52.5	14.77	19.96	22.77	22.69	29.85	31.43	23.42	12.88
		53	15.47	20.24	23.12	23.26	30.93	31.53	23.73	12.58
		53.5	16.39	21.13	22.79	23.66	31.83	31.82	23.88	12.16
		54	16.62	21.95	22.95	24.21	32.38	32.93	23.83	12.38
		54.5	16.12	22.43	23.31	24.79	32.75	34.05	23.99	12.2
		55	16.06	23.44	23.31	24.77	32.62	34.97	24.62	11.87
		55.5	16.27	24.7	23.62	24.89	32.61	35.82	25.05	12.2
		56	15.95	25.66	23.85	25.23	32.86	36.26	24.96	12.37
		56.5	16.22	26.77	23.48	25.06	32.64	36.34	25.41	11.98
		57	16.97	27.6	23.72	25.13	32.27	36.16	25.46	11.81
		57.5	17.41	27.69	23.87	25.99	32.22	36.42	24.79	11.86
		58	17.61	27.64	23.73	26.63	32.19	37.02	24.94	12.11
		58.5	18.09	27.37	24.56	26.92	32.25	37.3	25.58	12.32
		59	17.94	26.84	25.51	27.49	32.66	37.52	25.62	12.07
		59.5	17.29	26.48	25.57	27.67	33.14	37.69	26.12	12.17
		60	16.81	26.12	25.82	27.52	33.77	37.53	26.86	12.42
		60.5	16.52	25.67	26.92	27.43	34.15	37.48	26.99	11.77
		61	15.91	25.31	27.1	27.13	34.07	37.65	26.99	11.34
		61.5	15.76	24.75	26.81	27.14	33.79	37.96	27.11	11.74
		62	16.32	24.13	27.4	27.24	33.39	38.41	27.16	11.81
		62.5	16.8	23.64	28.11	27.02	32.78	38.44	26.99	11.77
		63	17.23	23.01	28.06	27.23	31.62	38.17	26.97	12.34
		63.5	18.41	22.11	28.16	27.95	30.85	37.82	26.55	13.03
		64	18.99	21.72	28.77	27.93	30.48	37.32	26.35	13.16
		64.5	21.93	22.53	30.96	30.94	32.9	39.61	27.47	14.96
		65	10.84	9.93	14.08	14.72	15.28	18.03	12.16	7.23
	C354A
		Temperature	0 µM	6.25 μM	12.5 µM	25 μM	50 µM	100 μM	200 µM	400 μM
		25	0.48	2.2	1.23	2.69	1.13	1.14	2.65	0.94
		25.5	1.03	4.77	2.67	5.84	2.44	2.48	5.74	2.05
		26	0.95	4.4	2.47	5.39	2.25	2.29	5.3	1.89
		26.5	0.95	4.4	2.47	5.39	2.25	2.29	5.3	1.89
		27	0.95	4.4	2.47	5.39	2.25	2.29	5.3	1.89
		27.5	0.95	4.43	2.48	5.4	2.25	2.26	5.22	1.69
		28	0.82	4.25	2.42	5.3	2.22	2.46	5.73	2.86
		28.5	1.94	4.11	2.35	5.37	2.59	2.68	6.76	5.77
		29	3.9	4.4	2.55	5.58	2.8	3.33	8	8.64
		29.5	5.54	5.4	3.47	6.03	3.53	4.71	9.66	11.93
		30	6.92	6.3	4.6	7.3	4.46	6.18	10.96	15.81
		30.5	7.89	6.94	5.13	8.02	4.53	7.17	11.41	17.19
		31	8.14	7.15	4.63	7.41	4.15	7.54	11.09	16.04
		31.5	7.43	6.59	3.81	6.81	3.53	7.05	9.53	14.49
		32	6.73	5.18	2.56	5.7	2.41	5.41	7.24	11.91
		32.5	5.92	2.98	0.65	3.36	0.89	3.02	5.28	8.09
		33	4.64	0.74	-0.96	1.15	-0.67	0.27	3.12	5.28
		33.5	2.87	-1.27	-2.57	-0.51	-2.73	-2.7	0.82	3.13
		34	0.74	-3.87	-4.79	-2.75	-4.97	-5.72	-1.28	0.21
		34.5	-2.23	-6.42	-7.44	-4.87	-7.91	-8.85	-3.91	-2.95
		35	-5.36	-8.64	-10.34	-6.51	-11.78	-12.17	-7.04	-5.97
		35.5	-10.13	-11.73	-14.02	-8.77	-16.55	-16.05	-10.2	-9.82
		36	-17.39	-15.45	-18.21	-12.04	-22.29	-21.33	-14.11	-14.7
		36.5	-25.87	-20.04	-23.66	-16.67	-30.13	-28.76	-19.26	-20.64
		37	-36.1	-27.13	-31.83	-23.77	-41.1	-39.62	-26.22	-29.63
		37.5	-50.4	-37.82	-44.01	-34.77	-56	-55.91	-36.74	-42.91
		38	-66.12	-52.72	-61.07	-49.8	-75.83	-77.69	-51.04	-60.35
		38.5	-82.35	-71.7	-82.57	-68.39	-100.42	-103.48	-68.3	-81.65
		39	-101.17	-92.05	-106.14	-88.13	-126.17	-130.96	-86.73	-104.78
		39.5	-119.35	-111.12	-127.83	-105.91	-148.44	-154.65	-102.7	-125.01
		40	-132.45	-125.46	-143.6	-117.95	-163.33	-168.77	-112.6	-138.09
		40.5	-138.42	-130.4	-149.45	-121.2	-166.23	-170.73	-114.29	-141.14
		41	-135.33	-125.25	-143.45	-114.51	-155.65	-159.82	-106.64	-132.82
		41.5	-122.18	-112.05	-127.5	-99.83	-134.9	-138.05	-91.37	-115.2
		42	-102.46	-91.96	-104.88	-80.2	-108.03	-110.35	-72.13	-92.29
		42.5	-79.4	-68.64	-78.98	-58.31	-78.98	-81.44	-51.42	-67.88
		43	-56.62	-47.42	-54.36	-38.15	-52.78	-54.99	-32.24	-45.61
		43.5	-37.58	-29.7	-34.19	-21.67	-31.5	-33.23	-16.77	-27.75
		44	-22.84	-15.5	-18.65	-8.84	-15.09	-16.38	-5.21	-14.27
		44.5	-11.56	-6.01	-7.45	0.47	-3.51	-3.96	3.29	-4.09
		45	-3.72	-0.02	-0.01	6.35	4.28	4.41	8.79	2.93
		45.5	1.68	4.68	5.13	10.3	10.05	10.42	12.45	7.56
		46	5.35	8.2	8.68	13.23	14.14	14.5	15.1	11.07
		46.5	7.75	10.22	11.29	15	16.65	17.14	17.33	13.55
		47	9.77	12.17	13.42	16.44	18.57	19.1	19.17	14.68
		47.5	11.64	14	15.09	17.75	20.21	20.75	20.41	15.48
		48	12.71	14.88	16.48	18.88	21.27	21.53	21.22	16.37
		48.5	14.22	15.55	17.95	19.77	21.85	22.27	21.75	16.97
		49	15.92	16.39	19.14	20.49	22.48	23.14	21.93	17.31
		49.5	16.39	16.47	20.07	20.87	23.04	23.66	21.74	18.11
		50	16.55	16.67	20.74	21.11	23.52	24.3	21.89	18.65
		50.5	17.13	17.5	21.04	21.24	23.7	25.29	22.04	18.83
		51	17.33	18.19	21.18	21.09	23.88	26.29	22.21	19.19
		51.5	17.7	18.99	21.29	21.47	24.29	27.15	22.45	19.78
		52	18.76	20.06	21.25	21.87	24.69	27.97	22.64	19.93
		52.5	19.62	20.37	21.28	21.86	24.62	28.58	22.66	20.19
		53	20.19	20.18	21.43	21.96	24.85	28.82	22.78	20.73
		53.5	20.89	19.64	21.71	22.17	25.16	28.53	22.39	20.72
		54	21.06	19.12	22.02	21.52	25	28.28	21.76	20.79
		54.5	20.86	19.27	22.24	21.09	24.72	28.32	21.56	21.18
		55	21	19.42	22.68	21.39	24.81	28.38	21.49	21.27
		55.5	21.32	19.62	23.01	21.36	24.95	28.37	21.12	21.04
		56	21.38	20.28	22.82	21.06	24.84	28.87	21.23	20.95
		56.5	21.53	20.41	22.88	21.19	25.33	29.58	21.57	20.63
		57	22.13	19.84	23.19	21.06	26.25	30.04	21.26	20.25
		57.5	22.55	20.17	23.3	20.33	26.98	30.21	20.77	20.37
		58	22.71	20.17	23.54	19.91	27.23	30.72	20.44	20.73
		58.5	23.03	20.1	24.03	19.82	27.52	31.15	19.9	21.22
		59	23.5	21.01	24.47	19.65	27.63	30.93	19.47	21.82
		59.5	23.72	21.76	24.69	19.7	27.88	30.38	19.34	22.22
		60	23.81	21.6	24.69	20.11	28.23	30.33	19.26	22.4
		60.5	24.11	22.11	24.7	19.94	28.81	30.4	19.34	22.53
		61	24.42	22.47	24.76	19.51	29.93	30.34	19.23	22.5
		61.5	24.49	22	24.41	19.13	30.79	30.69	19.06	22.51
		62	24.43	22.07	24.29	18.59	30.76	31.46	19.19	22.84
		62.5	24.38	22.42	24.45	17.94	30.79	31.93	19.07	22.85
		63	24.18	22.73	24.42	17.96	30.99	32.26	19.11	22.89
		63.5	23.59	23.05	24.3	18.37	30.9	32.54	19.42	22.64
		64	23.4	23.43	24.48	18.41	30.85	32.54	19.27	22.39
		64.5	24.63	25.56	26.41	20.62	34.09	35.08	20.6	23.06
		65	11.03	11.84	12.09	9.78	16.03	16.07	9.38	10.07
	S351A
		Temperature	0 µM	6.25 μM	12.5 µM	25 μM	50 µM	100 μM	200 µM	400 μM
		25	1.95	2.59	1.58	1.94	1.52	2.29	2.45	0.97
		25.5	4.22	5.61	3.42	4.21	3.3	4.95	5.3	2.1
		26	3.9	5.18	3.15	3.89	3.05	4.57	4.89	1.94
		26.5	3.9	5.18	3.15	3.89	3.05	4.57	4.89	1.94
		27	3.9	5.18	3.15	3.89	3.05	4.57	4.89	1.94
		27.5	3.92	5.19	3.14	3.92	3.01	4.55	4.86	1.67
		28	3.72	5.06	3.17	3.67	3.16	4.67	5	3.25
		28.5	3.72	5.12	3.82	3.63	4.06	4.89	5.6	6.69
		29	4.48	5.45	4.31	4.01	4.8	6.2	6.6	9.86
		29.5	5.47	5.74	4.91	4.68	5.42	8.25	7.53	13.18
		30	6.79	6.08	6.08	5.71	6.75	9.59	8.87	16.23
		30.5	8.03	6.17	6.49	6.7	7.48	10.02	10.27	17.75
		31	8.92	5.99	5.82	6.73	6.73	9.91	10.46	17.67
		31.5	8.89	5.36	5.2	6.37	5.94	8.82	9.86	16.33
		32	7.94	4.02	4.58	5.47	4.92	6.62	9.01	14.1
		32.5	6.83	2.69	3.11	3.6	2.96	4.63	7.07	10.93
		33	5.35	1.85	1.55	1.87	0.97	3.1	4.27	7.6
		33.5	3.46	0.57	0.17	0.75	-0.51	1.26	2.12	4.58
		34	1.68	-0.75	-1.42	-0.67	-2.17	-0.87	0.11	1.57
		34.5	0.06	-1.28	-3.15	-2.3	-4.04	-2.66	-2.2	-1.58
		35	-2	-2.07	-4.64	-3.23	-5.7	-4.35	-4.2	-4.52
		35.5	-3.94	-3.62	-6.01	-4.62	-7.37	-6.61	-6.2	-7.36
		36	-5.74	-4.76	-7.63	-6.93	-9.42	-9.03	-8.87	-10.49
		36.5	-8.1	-5.73	-9.89	-9.34	-11.92	-11.79	-12.24	-13.99
		37	-10.96	-7.87	-13.13	-12.05	-15.11	-15.98	-16.47	-18.77
		37.5	-14.52	-11.03	-17.34	-16.37	-20.06	-22.18	-22.34	-25.26
		38	-19.73	-14.84	-22.95	-22.61	-26.9	-30.4	-30.13	-33.98
		38.5	-26.8	-20.69	-30.84	-30.85	-36.37	-41.3	-40.21	-45.72
		39	-35.62	-29.02	-41.22	-41.49	-48.83	-54.54	-52.66	-60.23
		39.5	-46.92	-38.9	-53.69	-55.13	-63.83	-69.46	-67.21	-76.06
		40	-60.46	-49.8	-68.38	-70.47	-80.22	-85.61	-83.04	-92.14
		40.5	-74.51	-61.45	-84.37	-85.45	-96.54	-100.83	-97.72	-106.89
		41	-87.55	-72.37	-98.68	-98.74	-110.25	-112.62	-109.22	-117.24
		41.5	-97.74	-80.5	-109.18	-108.5	-119.04	-119.45	-116.1	-121.33
		42	-102.66	-84.74	-114.17	-112.25	-121.51	-119.86	-116.27	-118.87
		42.5	-101.35	-83.87	-112	-108.98	-116.85	-112.23	-109.03	-109.33
		43	-93.93	-77.88	-102.79	-99.39	-105.79	-98.2	-96.17	-93.53
		43.5	-81.55	-67.67	-88.38	-84.83	-89.83	-80.49	-79.56	-74.77
		44	-66.93	-54.5	-70.76	-67.8	-71.24	-61.22	-61.36	-55.7
		44.5	-51.46	-40.34	-52.54	-50.09	-52.6	-42.57	-44.21	-37.71
		45	-36.62	-28	-36.33	-34.31	-36.19	-27.16	-29.27	-23.19
		45.5	-24.56	-17.63	-23.13	-21.73	-22.3	-15.58	-17.2	-12.7
		46	-15.31	-8.83	-12.92	-11.98	-11.31	-6.99	-8.26	-4.8
		46.5	-7.32	-3.1	-5.78	-4.52	-3.71	-0.6	-1.31	0.86
		47	-1.76	0.63	-1.18	0.47	1.59	4.09	3.98	4.62
		47.5	1.67	4.13	2.4	4	5.95	7.58	7.6	7.75
		48	4.98	6.28	5.71	7.04	9.02	10.75	10.25	10.7
		48.5	7.59	7.34	8.34	9.74	10.67	13.56	12.46	13.18
		49	8.67	9.03	10.52	12.03	12.22	15.38	14.02	15.41
		49.5	9.51	10.29	12.49	13.32	13.74	16.33	15.25	17.48
		50	10.84	10.98	13.97	14.69	14.75	17.65	16.39	19.25
		50.5	11.28	12.42	14.93	15.7	15.72	18.82	17.25	20.2
		51	11.41	13.66	15.49	15.5	17.13	19.29	18.13	20.43
		51.5	12.35	13.97	15.9	15.4	18.14	19.85	19.15	20.89
		52	13.29	14.39	16.37	16.37	18.97	20.78	20.15	21.29
		52.5	13.51	14.68	16.7	16.94	19.94	20.85	21.05	21.53
		53	14	14.73	16.76	17.2	20.2	20.63	22.07	22.65
		53.5	14.87	14.86	17.09	18.06	19.93	21.25	22.75	24.24
		54	15.33	15.12	17.56	18.09	20.28	21.81	23.06	24.93
		54.5	15.71	15.46	17.93	17.7	20.65	22.25	23.1	25.51
		55	16.34	15.65	18.23	17.88	20.67	23.24	22.97	26.44
		55.5	16.84	15.33	18.55	18.21	21.31	24.25	22.7	26.7
		56	16.8	15.04	18.86	18.88	22.34	24.69	22.62	26.61
		56.5	16.76	15.11	18.94	20.22	22.91	24.99	22.56	27.06
		57	16.97	15.22	19.02	20.94	22.95	24.82	22.57	27.19
		57.5	17.04	15.75	19.71	20.74	23.52	24.28	22.81	27.07
		58	17.13	16.43	20.17	20.35	24.06	23.74	23.22	27.02
		58.5	17.56	16.94	20.15	19.55	24.27	23.21	23.44	26.77
		59	17.58	17.17	20.63	19	24.53	23.04	23.48	26.77
		59.5	17.27	17.07	21.18	18.96	25.03	23.3	23.73	27.19
		60	17.28	16.54	20.93	19.44	25	23.51	23.57	27.37
		60.5	17.21	16.04	20.98	20.36	24.69	23.37	23.18	27.72
		61	17.45	15.46	21.3	20.92	24.65	23.27	22.94	28.43
		61.5	18.37	15.17	21.17	20.58	24.49	23.18	22.84	28.37
		62	18.96	15.6	21.06	20.46	24.53	22.85	22.64	28.35
		62.5	18.97	15.97	21.31	20	24.6	22.83	22.84	28.53
		63	18.82	16.57	21.85	19.14	24.55	23.05	23.18	28.2
		63.5	18.18	16.48	22.18	18.66	24.15	23.51	23.21	27.89
		64	17.42	16.47	22.55	18.39	23.99	23.74	23.47	27.92
		64.5	18.17	15.76	24.45	19.42	25.2	26.65	25.17	30.2
		65	8.23	6.13	11.19	8.77	11.27	12.76	11.4	13.91
	H336N
		Temperature	0 µM	6.25 μM	12.5 µM	25 μM	50 µM	100 μM	200 µM	400 μM
		25	1.21	1.68	0.82	1.57	2.44	0.48	5.93	2.51
		25.5	2.61	3.64	1.77	3.41	2.25	1.04	12.85	5.44
		26	2.41	3.36	1.63	3.15	2.25	0.96	11.86	5.02
		26.5	2.41	3.36	1.63	3.15	2.25	0.96	11.86	5.02
		27	2.41	3.36	1.63	3.15	2.25	0.96	11.86	5.02
		27.5	2.34	3.39	1.6	3.18	2.18	0.93	11.86	4.83
		28	2.8	3.11	1.84	2.98	2.66	1.12	11.76	5.89
		28.5	3.65	3.31	2.23	2.44	3.84	1.58	12.35	8.57
		29	5.29	3.83	2.77	2.86	5.5	2.37	13.6	11.26
		29.5	7.64	4.19	3.38	4.59	6.85	3.67	15.04	14.59
		30	9.48	4.82	4.15	5.65	7.55	4.63	16.55	17.8
		30.5	10.13	5.35	4.64	6.01	7.52	5.46	17.59	19.37
		31	10.36	5.23	4.66	6.4	6.57	5.74	17.32	19.22
		31.5	9.74	4.84	4.18	5.61	4.64	4.89	15.22	17.25
		32	7.88	4.12	3.06	3.98	2.41	3.45	12.34	13.79
		32.5	5.92	2.91	1.27	2.01	0.4	1.6	9.32	10.22
		33	3.83	1.29	-0.91	0.03	-1.71	-0.68	6.14	7.06
		33.5	1.28	-0.84	-3.14	-2.21	-4.09	-3.11	3.12	4.01
		34	-1.77	-3.13	-5.65	-4.65	-6.25	-5.68	0.74	1.78
		34.5	-4.88	-5.67	-8.65	-7.09	-8.4	-8.69	-1.77	0.12
		35	-8.67	-8.58	-11.62	-9.5	-11.74	-11.47	-5.07	-2.38
		35.5	-12.97	-11.86	-15.05	-12.82	-15.89	-15.22	-8.92	-5.56
		36	-18.11	-15.94	-20.25	-17.45	-21.37	-20.46	-13.12	-9.06
		36.5	-25.06	-21.82	-27.36	-23.62	-30.09	-27.29	-19.18	-14.36
		37	-34.59	-29.99	-37.04	-32.98	-42.6	-37.11	-27.74	-21.87
		37.5	-47.78	-41.62	-51.62	-46.39	-58.21	-51.76	-38.81	-31.45
		38	-66.02	-57.36	-71.69	-64.11	-77.5	-70.49	-53.01	-43.38
		38.5	-88.97	-77.13	-95.92	-85.31	-97.94	-92.67	-70.28	-57.23
		39	-113.6	-98.98	-122.22	-108.07	-115.87	-116.61	-87.53	-70.74
		39.5	-136.93	-119.9	-147.07	-129.41	-128.88	-137.29	-101.59	-82.24
		40	-155.43	-136.34	-165.75	-145.2	-134.14	-151.36	-110.67	-89.72
		40.5	-164.4	-145.15	-173.98	-151.68	-129.65	-156.53	-111.85	-91.38
		41	-161.32	-143.34	-170.09	-148.04	-116.89	-150.32	-104.64	-86.82
		41.5	-147.73	-131.46	-155.21	-134.8	-98.19	-134.19	-91.52	-76.72
		42	-126.38	-112.86	-132.04	-113.96	-75.91	-112.89	-74.62	-62.74
		42.5	-100.34	-89.69	-103.93	-89.58	-53.53	-88.41	-55.35	-46.94
		43	-73.86	-65.44	-75.66	-65.26	-33.65	-63.59	-37.55	-31.49
		43.5	-50.55	-44.39	-50.55	-43.02	-17.65	-42.32	-22.42	-17.59
		44	-31.88	-27.45	-30.06	-25.1	-5.75	-25.11	-9.5	-6.69
		44.5	-17.48	-13.67	-14.41	-11.29	2.65	-11.4	0.61	1.34
		45	-6.93	-4.15	-3.61	-1.1	7.99	-1.45	7.52	6.73
		45.5	0.23	1.99	3.73	5.3	11.37	5.39	12.58	10.25
		46	5.19	6.89	8.79	9.83	14.05	10.42	16.43	12.75
		46.5	8.97	10.38	12.25	10.13	16.15	14.11	18.96	14.68
		47	11.69	12.41	14.39	5.77	17.52	16.71	20.5	16.2
		47.5	13.94	14.15	15.95	1.44	18.65	18.65	21.46	18.09
		48	13.68	15.62	16.87	-2.16	19.54	19.84	22.1	19.83
		48.5	10.83	16.47	17.47	-7.24	20.23	20.44	22.53	20.41
		49	8.01	17.32	18.47	-6.36	20.85	21.17	23.02	20.86
		49.5	4.74	17.86	19.65	1.11	21.16	22.13	23.79	21.3
		50	0.74	18.28	20.76	7.22	21.75	22.39	24.75	20.95
		50.5	1.19	19.09	21.81	12.52	22.07	22.52	25.27	20.31
		51	6.22	19.63	22.92	18.36	21.81	22.74	25.29	20.41
		51.5	10.81	19.74	23.55	21.43	21.9	22.21	24.92	20.19
		52	15.36	20.43	23.9	21.57	22.41	21.64	24.3	19.65
		52.5	20.22	21.16	24.22	22.2	22.44	22.08	23.6	19.87
		53	22.89	21.22	24.86	22.96	22.7	22.87	23.61	20.27
		53.5	22.97	21.43	25.36	24.03	22.94	23.56	24.08	20.19
		54	23.13	22.05	25.7	24.29	22.46	24.09	24.41	20.49
		54.5	23.85	22.32	26.19	24.04	21.83	24.33	24.74	21.04
		55	24.24	22.2	26.43	24	21.28	24.24	25.03	20.7
		55.5	24.16	22.08	26.14	23.85	20.9	23.78	24.8	20.37
		56	24.41	22.02	25.82	23.37	20.95	23.36	24.49	20.17
		56.5	24.72	21.98	25.62	23.54	21.11	23.79	24.59	19.69
		57	24.69	22.13	25.48	23.67	21.02	24.32	24.4	19.04
		57.5	24.94	22.63	25.79	23.61	21.26	24.4	23.96	18.83
		58	25.38	23.34	26.46	24	21.5	24.89	23.86	19.07
		58.5	25.32	23.96	26.83	24.23	21.48	25.28	23.55	19.32
		59	25.22	24.21	27.27	24.21	22.01	25.07	22.9	19.51
		59.5	25.37	24.02	27.59	24.43	23.12	24.6	22.74	19.84
		60	25.44	23.54	27.4	24.81	23.7	24.37	22.78	19.86
		60.5	25.53	23.26	27.4	24.62	23.87	24.03	22.43	19.04
		61	26.31	23	27.91	24.88	24.23	24.21	22	18.39
		61.5	27.03	23.01	28.01	25.27	24.06	24.69	21.67	18.17
		62	26.93	23.43	27.91	25.37	23.38	25.28	21.34	18.08
		62.5	26.7	23.88	28.09	25.25	22.81	25.76	21.25	18.26
		63	26.43	24.24	27.6	25.08	22.66	25.98	21.35	18.95
		63.5	25.9	24.16	26.8	24.64	22.35	25.53	21.82	19.45
		64	25.38	24.12	26.51	24.15	24.41	24.99	22.31	19.69
		64.5	27.63	25.15	28.31	25.71	11.49	26.08	24.87	21.29
		65	12.9	11.09	12.86	11.7		11.54	11.76	9.74
