# Supplementary material for: Allosteric cooperation in β-lactam binding to a non-classical transpeptidase
Source: eLife. 2022 Apr 27;11:e73055. doi: 10.7554/eLife.73055 (PMC9094749; doi:10.7554/eLife.73055)
Supplement: Figure 5—source data 1. [file elife-73055-fig5-data1.xlsx]

## Sheet: Sheet1
	Raw data from ThermoFluor assay on AMPICIILIN binding with wild-type (Figure-5A)
		Temperature	0 µM	6.25 μM	12.5 µM	25 μM	50 µM	100 μM	200 µM	400 μM
		25	1.36	4.74	3.56	3.34	3.43	3.25	4.25	0.16
		25.5	2.95	10.27	7.71	7.23	7.42	7.03	9.2	0.35
		26	2.72	9.48	7.12	6.67	6.85	6.49	8.49	0.32
		26.5	2.72	9.48	7.12	6.67	6.85	6.49	8.49	0.32
		27	2.72	9.48	7.12	6.67	6.85	6.49	8.49	0.32
		27.5	2.76	9.52	7.12	6.65	6.84	6.46	8.51	0.3
		28	2.44	9.36	7.11	6.76	6.82	6.66	8.44	0.42
		28.5	2.28	8.66	7.18	7.1	7.32	6.84	8.04	0.96
		29	2.34	8.4	7.21	7.99	8.42	7.24	7.85	1.31
		29.5	2.94	8.45	7.2	8.71	9.5	8.09	8.13	2.03
		30	3.78	8.27	7.02	8.71	9.89	9.03	7.85	2.58
		30.5	4.65	7.59	6.45	8.49	9.3	8.96	7.03	2.56
		31	5.39	6.03	5.36	6.97	7.48	7.5	6.22	3.54
		31.5	5.52	3.74	3.41	4.12	4.43	5.43	4.83	4.25
		32	4.55	1.36	0.75	1.36	0.67	2.83	2.58	3.43
		32.5	2.38	-1.01	-1.89	-1.39	-2.6	-0.44	0.22	2.23
		33	-0.58	-3.81	-5.07	-5.19	-5.26	-3.81	-2.55	0.35
		33.5	-4.81	-6.5	-9.32	-9.31	-8.6	-7.12	-6.68	-4.92
		34	-10.54	-10.05	-14.63	-13.74	-12.63	-11.78	-12.17	-13.2
		34.5	-18.31	-15.81	-21.67	-20.16	-17.76	-18.42	-19.71	-24.48
		35	-28.91	-24.22	-31.89	-28.94	-26.25	-27.78	-30.59	-41.13
		35.5	-44.28	-36.06	-46.92	-41.28	-39.64	-41.39	-46.14	-63.92
		36	-65.15	-52.73	-67.48	-59.04	-57.84	-61	-67.25	-93.46
		36.5	-92.78	-75.42	-95.2	-83.55	-82.58	-87.52	-95.3	-131.34
		37	-130.3	-106.18	-133.7	-117.56	-117.11	-123.16	-132.79	-179.32
		37.5	-180.1	-147.29	-185.02	-163.5	-163.48	-170.26	-181.21	-238.78
		38	-243.1	-199.4	-249.21	-221.41	-221.55	-228.68	-239.51	-308.01
		38.5	-317.77	-260.25	-325.02	-289.21	-289.14	-294.51	-304.09	-380.52
		39	-399.92	-325.23	-407.38	-362.84	-361.76	-362.16	-369.45	-448.88
		39.5	-481.52	-388.59	-487.57	-434.93	-431.03	-424.35	-426.84	-503.94
		40	-552.91	-442.16	-555.89	-495.58	-486.68	-471.23	-467.35	-535.81
		40.5	-603.61	-477.16	-601.93	-535.58	-520.84	-495.31	-484.92	-539.59
		41	-627.69	-490.53	-620.13	-550.33	-529.84	-494.67	-478.43	-517.17
		41.5	-622.52	-481.96	-609.12	-538.27	-512.48	-470.79	-449.87	-472.84
		42	-587.04	-450.52	-567.71	-498.46	-470.68	-426.19	-402.81	-412.16
		42.5	-524.85	-399.97	-500.68	-436.49	-409.54	-366.77	-343.69	-342.48
		43	-443.34	-337.55	-417.63	-360.55	-335.96	-299.29	-278.97	-270.54
		43.5	-351.39	-268.64	-325.7	-278.09	-257.58	-229.44	-212.99	-200.61
		44	-257.97	-198.86	-232.87	-196.36	-181.35	-162.1	-150.7	-136.66
		44.5	-171.8	-134.74	-149.62	-123.21	-112.99	-101.69	-96.05	-82.55
		45	-98.91	-80	-80.64	-63	-56.92	-51.81	-50.51	-38.91
		45.5	-42.9	-36.38	-26.61	-16.67	-14.29	-13.38	-14.67	-5.38
		46	-2.27	-3.7	11.89	16.61	16.32	14.55	11.09	17.97
		46.5	25.68	19.61	36.94	38.99	36.91	33.54	28.79	33.68
		47	43.3	35.55	53.19	53.41	50.07	45.61	40.74	44.8
		47.5	53.63	46	63.18	62.61	58.71	54	48.3	51.59
		48	60.3	53.15	68.62	67.7	64.26	59.86	52.17	55.14
		48.5	64.74	58.24	72	71.41	67.75	63.58	54.56	58.26
		49	67.93	61.53	74.8	74.19	70.27	66.38	56.96	60.79
		49.5	70.75	63.65	76.7	75.32	72.08	68.8	58.63	62.62
		50	73.61	65.26	77.93	76.17	72.94	70.14	59.62	64.76
		50.5	76.32	66.61	79.13	77.78	73	71.15	61.18	66.83
		51	77.9	67.39	80.13	77.89	72.9	72.01	63.18	67.8
		51.5	79.03	68.45	80.47	77.38	72.55	72.38	64.63	68.37
		52	80.41	69.9	80.73	77.83	72.13	72.34	65.47	68.34
		52.5	81.55	71.2	81.77	77.52	71.84	72.04	66.35	67.63
		53	81.96	72.1	82.53	76.52	71.71	71.28	67.36	67.23
		53.5	82.84	72.73	82.44	76.41	71.55	70.78	67.02	67.12
		54	83.45	73.18	82.37	76.28	71.54	70.9	66.22	67.34
		54.5	83.36	73.4	82.63	75.64	71.7	71.22	66.39	68.7
		55	83.44	73.64	82.46	76.18	71.96	72.04	66.76	70.83
		55.5	83.42	73.86	81.68	76.52	72.49	72.93	66.52	72.7
		56	82.89	74.41	81.05	75.94	73.06	73.4	66.89	74.99
		56.5	82.81	75.14	81.19	76.29	73.77	73.37	67.76	77.13
		57	82.58	75.53	80.75	76.71	74.2	73.03	68.05	77.71
		57.5	82.02	75.64	79.61	75.67	74.28	72.55	68.22	77.69
		58	82.3	75.9	79.69	75.2	74.1	72.48	68.71	77.91
		58.5	82.74	75.95	80.54	75.84	73.76	73.13	69.21	77.83
		59	83.14	75.57	80.48	75.41	73.13	74.19	69.89	77.85
		59.5	84.31	75.61	80.62	75.1	72.49	75.26	70.71	78.83
		60	85.24	76.12	81.67	76.05	72.33	76.2	70.99	79.85
		60.5	85.51	76.32	82.25	76.4	72.55	76.86	71.43	80.57
		61	86.38	76.33	82.55	75.97	72.86	76.87	72.06	80.99
		61.5	86.91	76.71	83.07	76.03	72.93	76.24	71.47	80.93
		62	86.57	77.04	83.85	76.09	73.29	76	70.86	80.9
		62.5	86.7	77.12	84.67	75.73	73.54	76.06	71.22	81.37
		63	87.03	77.7	85.28	75.64	73.32	75.95	70.89	81.97
		63.5	86.42	78.68	86.38	76.28	73.74	76.32	70.25	83.25
		64	86.28	79.1	87.13	76.59	74.08	76.9	70.76	84.59
		64.5	92.83	86.55	96.11	84.11	81.49	84.21	76.74	93.81
		65	42.39	40.32	45.11	39.44	38.24	39.27	35.31	44.26
	Raw data from ThermoFluor assay on AMPICIILIN binding with R209E mutant (Figure-5A)
		Temperature	0 µM	6.25 μM	12.5 µM	25 μM	50 µM	100 μM	200 µM	400 μM
		25	-0.329332	5.55095	2.45376	2.51094	3.04694	3.48458	3.22251	0.0163024
		25.5	-0.713552	12.027	5.31647	5.44036	6.6017	7.54993	6.98211	0.0353219
		26	-0.658664	11.1019	4.90751	5.02187	6.09388	6.96916	6.44502	0.0326048
		26.5	-0.658664	11.1019	4.90751	5.02187	6.09388	6.96916	6.44502	0.0326048
		27	-0.658664	11.1019	4.90751	5.02187	6.09388	6.96916	6.44502	0.0326048
		27.5	-0.610987	11.0791	4.90832	4.99695	6.00103	6.82827	6.32342	-0.119568
		28	-1.01208	11.3023	4.85022	5.11126	6.5263	7.55666	7.06118	0.749529
		28.5	-1.05803	11.0161	5.14275	5.6041	7.88466	10.0905	8.50432	2.96075
		29	0.656197	10.528	5.86162	6.61585	9.64829	13.2619	10.4166	5.50979
		29.5	2.3104	10.7533	7.21045	7.88815	11.7361	16.5464	12.7851	8.43075
		30	3.99512	10.9217	8.18642	9.33739	13.5359	20.4414	14.8799	11.7456
		30.5	6.33405	10.0963	7.83437	10.0591	14.1955	23.2499	16.35	15.1832
		31	7.823	9.0706	6.58704	9.23254	13.1513	23.8709	17.6678	17.7839
		31.5	7.6958	8.01395	4.1317	7.47397	10.6606	22.6347	17.7548	19.0793
		32	7.33126	5.5034	0.610268	5.08581	7.19385	19.7199	15.9634	19.5925
		32.5	6.85958	2.40023	-2.89301	1.90976	3.03306	15.1895	13.7626	18.4954
		33	4.95821	0.100999	-6.14394	-1.12468	-0.824397	9.87474	10.7414	15.3408
		33.5	2.17696	-1.93986	-9.34775	-3.86671	-4.22911	4.96457	6.25262	10.9535
		34	-1.15583	-4.34819	-12.2701	-6.88826	-7.33364	0.5304	1.48679	5.94893
		34.5	-4.95947	-6.7048	-15.171	-9.98294	-10.1412	-3.41811	-3.02863	0.131481
		35	-9.2346	-8.867	-18.532	-13.2076	-12.5982	-7.0609	-8.39635	-6.22384
		35.5	-13.6653	-11.4486	-22.121	-16.8644	-15.4963	-10.2214	-13.9499	-12.4012
		36	-17.6798	-14.6647	-26.1933	-20.6718	-18.6728	-13.9402	-19.2372	-18.6545
		36.5	-20.7216	-17.8413	-30.6193	-24.4929	-21.8536	-18.5189	-24.3538	-25.1498
		37	-23.8704	-20.6477	-35.0622	-28.8738	-25.8449	-23.234	-29.4399	-31.5392
		37.5	-27.1027	-23.9204	-39.5932	-33.325	-30.6268	-28.1516	-34.4506	-37.7556
		38	-29.5413	-27.6883	-44.1018	-37.9271	-35.1858	-33.4154	-39.1715	-43.938
		38.5	-31.6728	-31.0707	-48.137	-42.5034	-39.4738	-37.6299	-43.5971	-49.2777
		39	-33.4301	-34.1061	-51.8628	-46.5295	-43.9372	-40.5875	-48.2995	-54.3714
		39.5	-33.9427	-36.3804	-55.6133	-49.2417	-46.8668	-42.9913	-52.3344	-59.3594
		40	-33.1564	-37.4342	-57.9464	-50.5386	-47.7746	-43.9192	-54.4525	-62.984
		40.5	-31.6342	-37.1942	-58.016	-49.9256	-47.4287	-43.3434	-55.3368	-64.9453
		41	-29.0014	-35.2942	-56.4378	-47.5722	-45.6362	-41.7607	-54.792	-65.5087
		41.5	-25.3686	-31.8057	-53.41	-43.572	-41.9478	-38.3496	-51.3631	-63.6988
		42	-21.5452	-27.7637	-47.7788	-38.014	-37.3349	-33.0891	-46.0834	-59.1805
		42.5	-17.5444	-22.8982	-41.2073	-32.0472	-32.1386	-27.1141	-40.4473	-52.8298
		43	-13.0176	-17.2073	-35.3368	-26.1374	-26.6102	-20.6066	-33.7385	-45.4835
		43.5	-9.14522	-12.3396	-29.3652	-20.0843	-20.688	-14.1282	-26.4909	-37.5277
		44	-6.19318	-8.38523	-22.8864	-14.3331	-14.7063	-8.84667	-20.2409	-29.1454
		44.5	-3.39141	-4.5363	-17.3573	-9.72137	-9.65531	-4.72464	-14.8749	-21.2816
		45	-0.979579	-1.46827	-12.8786	-5.68978	-5.53377	-1.25106	-10.1457	-14.4015
		45.5	0.534667	0.922522	-8.72329	-2.16181	-1.69308	1.64953	-6.19609	-8.14738
		46	1.98335	3.4738	-4.96014	0.820785	1.16117	4.11842	-2.49175	-2.7075
		46.5	3.37842	5.87465	-1.84237	2.9697	3.28939	6.47336	0.541407	1.44021
		47	4.36173	7.84462	0.51848	4.83947	5.96448	8.74109	2.94468	4.90286
		47.5	5.06459	9.70808	2.81994	6.85054	8.69891	10.6427	5.56959	7.90132
		48	5.26807	11.4856	5.00918	8.90633	10.8331	12.4397	7.61589	10.0659
		48.5	5.5388	13.0791	6.64254	10.6155	12.6579	13.8537	8.52923	11.9557
		49	6.10258	14.3926	7.50287	12.1422	14.117	14.8708	9.77562	14.3257
		49.5	6.62349	15.064	8.10506	13.3864	14.9142	15.8231	11.5762	16.3577
		50	7.16388	15.5589	8.60718	14.4024	15.2332	16.6229	12.8687	17.332
		50.5	8.42356	15.9214	9.31623	15.2137	15.4925	17.0797	13.8593	18.5172
		51	9.68518	15.9242	9.87662	15.5093	16.1041	17.6281	15.333	19.9387
		51.5	9.8664	16.1574	10.5135	15.9088	16.7945	18.4229	16.5793	20.0522
		52	9.65568	17.1692	11.6942	16.8428	17.4453	18.9977	17.0559	19.7722
		52.5	9.48267	18.2746	12.7477	17.4664	18.2625	19.5764	17.2156	20.4975
		53	8.71499	18.9501	13.4608	17.627	19.2876	19.9669	17.8126	21.2706
		53.5	7.6852	19.7291	14.3362	18.3971	19.8249	20.2771	18.2953	21.276
		54	7.86305	20.5256	15.2274	19.3922	20.3034	21.0059	18.4648	21.6396
		54.5	8.69079	20.8564	15.9031	19.8137	20.5466	21.8813	18.9663	22.4638
		55	9.19975	20.7874	16.5613	20.044	20.6253	22.483	20.0572	23.2822
		55.5	9.93484	20.9227	16.8029	20.7015	20.7006	23.4132	20.6781	24.0833
		56	10.7416	21.241	16.9932	21.3749	21.0048	24.6362	20.8777	24.9543
		56.5	10.767	21.357	17.6937	21.3989	21.4325	24.9932	21.7804	25.5439
		57	10.1896	21.3788	18.1	21.5861	22.3206	24.9597	22.53	25.8997
		57.5	10.1896	21.5349	18.54	22.5295	23.4009	25.2639	22.7034	26.1176
		58	10.3663	21.8643	19.7578	23.2681	23.9167	25.4189	23.3646	25.7847
		58.5	10.195	21.88	20.765	23.4594	24.5139	25.2458	24.0603	25.5091
		59	10.4869	21.877	20.832	24.2265	25.1843	25.4756	23.9048	26.1191
		59.5	11.4919	22.1953	21.1098	25.0308	25.5385	26.1666	24.2136	26.773
		60	11.5231	22.5982	21.3724	24.9867	25.6857	26.6295	24.6569	26.5568
		60.5	11.4263	22.8615	20.9538	25.3285	26.3667	26.9087	24.722	26.5543
		61	11.9797	23.3425	20.87	26.0316	26.9231	27.1962	25.3506	27.0328
		61.5	12.0127	23.7229	21.5466	26.3515	27.1207	27.3772	25.9532	27.0542
		62	11.6937	23.7945	22.1854	26.7589	27.4546	27.5547	25.7876	26.9099
		62.5	12.3136	24.2552	22.6204	27.5574	28.0524	27.767	26.0837	27.3554
		63	12.9883	24.493	23.3557	27.9035	28.6028	28.2966	26.4472	27.7413
		63.5	13.2866	24.8198	23.0874	27.8594	29.4116	28.2414	26.5959	27.1899
		64	13.9908	25.2741	22.9191	28.128	30.0338	28.3233	27.0134	26.9657
		64.5	15.7712	28.3514	23.1467	30.0443	33.7169	29.5182	30.322	28.006
		65	7.43062	13.4618	9.78872	13.5744	16.0444	12.9109	14.3652	12.2713
		Raw data from ThermoFluor assay on CEFOTAXIME binding with WILD-TYPE (Figure-5B)
		Temperature	0 µM	6.25 μM	12.5 µM	25 μM	50 µM	100 μM	200 µM	400 μM
		25	0.8	2.99	2.68	3.15	2.68	1.97	-2.06	1.6
		25.5	1.73	6.49	5.8	6.83	5.82	4.27	-4.46	3.48
		26	1.59	5.99	5.35	6.3	5.37	3.94	-4.12	3.21
		26.5	1.59	5.99	5.35	6.3	5.37	3.94	-4.12	3.21
		27	1.59	5.99	5.35	6.3	5.37	3.94	-4.12	3.21
		27.5	1.66	6.01	5.41	6.31	5.35	3.96	-3.96	3.18
		28	1.14	5.85	4.95	6.3	5.44	3.83	-4.95	3.37
		28.5	0.87	5.71	4.72	5.91	6.09	3.56	-6.66	3.64
		29	1.62	6.09	5.14	6.03	6.59	3.89	-6.92	4.34
		29.5	2.16	6.39	5.33	6.56	6.62	4.65	-6.4	5.44
		30	2.8	6.37	5.41	6.25	6.63	4.68	-6.12	6.03
		30.5	4.24	5.77	5.37	5.39	5.9	3.79	-7	5.69
		31	5.25	4.96	3.92	4.16	3.9	2.15	-8.81	3.99
		31.5	5.43	3.42	1.71	2.17	1.48	-0.22	-11.24	0.99
		32	5.39	1.29	-0.55	-0.41	-1.65	-3.67	-14.07	-3.23
		32.5	4.73	-1.25	-3.86	-2.9	-5.2	-7.41	-16.23	-8.29
		33	2.9	-4.23	-7.74	-5.55	-8.59	-11.14	-17.8	-13.96
		33.5	0.06	-7.66	-11.59	-8.64	-12.53	-15.76	-19.7	-21.28
		34	-4.28	-12.3	-16.73	-12.79	-17.71	-22.23	-22.26	-31.26
		34.5	-10.79	-18.52	-23.78	-18.99	-23.98	-30.33	-26.51	-44.23
		35	-19.9	-26.64	-33.19	-27.6	-33.05	-41.4	-33.57	-61.4
		35.5	-32.96	-38.37	-47.45	-40.46	-46.85	-58.07	-44.64	-84.9
		36	-50.85	-55.74	-67.58	-58.78	-66.04	-80.76	-59.88	-114.11
		36.5	-74.44	-78.78	-94.4	-83.14	-92.38	-110.52	-79.87	-148.2
		37	-106.25	-109.96	-131.08	-116.08	-128.95	-150.56	-106.21	-187.87
		37.5	-149.23	-152.55	-179.89	-160.2	-177.59	-202.79	-138.78	-231.58
		38	-204.04	-206.39	-240.73	-215.51	-237.72	-265.41	-175.57	-274.67
		38.5	-269.06	-268.85	-311.78	-279.65	-306.61	-334.45	-214.13	-313.19
		39	-340.16	-337.22	-388.86	-348.67	-379.02	-404.61	-250.66	-343.77
		39.5	-410.96	-405.14	-464.45	-415.2	-447.82	-468.05	-279.66	-361.19
		40	-472.45	-462.91	-528.75	-470.61	-503.1	-514.52	-297.66	-362.81
		40.5	-515.01	-502.07	-572.47	-506.56	-536.71	-537.64	-301.99	-349.49
		41	-533.4	-518.31	-591.26	-519.53	-545.63	-536.73	-292.63	-324.03
		41.5	-526.46	-509.53	-583.13	-508.5	-529.27	-512.02	-271.84	-289.77
		42	-493.05	-475.5	-547.2	-473.81	-488.19	-465.12	-241.82	-250.27
		42.5	-435.33	-420.61	-487.95	-419.96	-427.89	-402.72	-205.64	-208.44
		43	-361.14	-352.05	-412.56	-352.91	-355.7	-331.56	-167.09	-166.45
		43.5	-279.35	-276.63	-327.64	-278.68	-277.58	-256.76	-128.77	-125.91
		44	-196.98	-201.05	-241.15	-204.28	-200.22	-184.31	-93.08	-88.29
		44.5	-121.46	-131.78	-161.81	-136.27	-130.35	-120.04	-62.1	-55.6
		45	-59.84	-73.26	-94.47	-78.02	-71.69	-67.25	-36.41	-28.84
		45.5	-13.74	-27.07	-41.31	-32.45	-25.83	-25.76	-16.34	-7.86
		46	19.04	7.25	-2.76	0.08	6.85	4.74	-2.24	7.3
		46.5	40.82	30.86	23.43	22.56	28.65	25.54	7.73	17.58
		47	53.94	46.25	41.22	37.66	43.03	39.88	14.55	24.79
		47.5	61.78	56.08	52.94	46.78	51.97	50.05	18.48	30.28
		48	66.58	62.18	60.17	52.31	57.23	56	20.69	33.47
		48.5	69.14	65.86	65.35	56.9	61.07	60.08	22.86	35.49
		49	70.39	68.51	69.26	60.35	64.26	63.51	24.5	37.52
		49.5	71.06	71.14	71.86	62.42	66.44	65.06	25.51	38.8
		50	71.61	73.69	73.89	64.5	68.09	65.98	26.67	39.04
		50.5	72.26	75.57	75.86	66.84	70	67.39	27.85	39.54
		51	72.81	76.95	77.29	68	71.63	68.25	28.87	39.9
		51.5	73.26	78.59	78.6	68.62	72.67	68.87	30.5	39.96
		52	73.94	79.26	79.88	69.64	73.33	70.24	31.94	40.12
		52.5	74.38	79.31	80.8	70.44	74.32	71.8	32.62	40.31
		53	74.03	79.9	81.35	70.65	74.75	73.14	33.23	40.4
		53.5	74.15	80.57	81.94	70.86	74.55	74.01	33.38	40.8
		54	74.55	80.88	82.48	71.21	74.71	74.52	32.46	41.27
		54.5	74.62	81.44	82.86	71.43	75.32	75.06	32.04	41.83
		55	74.89	82	83.44	71.7	75.48	74.94	32.87	42.76
		55.5	75.43	82.02	84.06	72.26	75.81	74.22	33.38	43.4
		56	75.46	82.27	84.21	73.01	76.83	74.2	33.74	43.89
		56.5	75.35	82.72	84.11	74.01	77.43	74.82	34.44	44.22
		57	75.18	82.97	84.03	74.93	77.66	74.92	34.99	44.48
		57.5	74.84	83.27	83.92	75.24	77.99	75.46	34.53	44.13
		58	74.72	83.82	83.95	75.37	78	76.93	34.27	44.05
		58.5	74.45	83.7	84.17	75.62	77.94	77.64	34.45	44.11
		59	74.26	83.3	85.11	75.83	78.23	77.58	34.54	43.69
		59.5	74.22	83.55	86.38	76.11	78.57	78.08	34.14	43.46
		60	74.1	83.83	87.34	76.88	79.04	78.64	33.98	44.08
		60.5	74.13	83.86	88.28	77.74	79.83	78.48	34.32	44.89
		61	74.68	84.75	89.49	78.45	80.61	79.18	34.4	45.75
		61.5	74.85	85.48	89.87	79.17	81.14	80.82	34.76	47.12
		62	74.96	85.11	90.1	80	81.86	82.09	35.8	48.09
		62.5	75.46	85.09	90.78	80.8	83.24	83.15	36.91	48.46
		63	75.2	85.12	91.37	81.79	84.59	84.78	37.62	48.65
		63.5	74.69	84.98	91.96	82.95	87.23	86.04	38.53	48.87
		64	74.71	85.09	92.5	83.63	89.13	86.36	39.13	48.92
		64.5	80.76	93.33	101	91.57	101.28	94.34	43.05	53.56
		65	37.15	43.58	46.82	42.66	48.96	43.88	20.21	25.1
		Raw data from ThermoFluor assay on CEFOTAXIME binding with R209E mutant (Figure-5B)
		Temperature	0 µM	6.25 μM	12.5 µM	25 μM	50 µM	100 μM	200 µM	400 μM
		25	0.344057	2.42334	2.82594	2.56121	2.30928	1.55076	6.14196	0.865225
		25.5	0.745456	5.25057	6.12286	5.54929	5.00344	3.35997	13.3076	1.87465
		26	0.688113	4.84668	5.65187	5.12242	4.61856	3.10151	12.2839	1.73045
		26.5	0.688113	4.84668	5.65187	5.12242	4.61856	3.10151	12.2839	1.73045
		27	0.688113	4.84668	5.65187	5.12242	4.61856	3.10151	12.2839	1.73045
		27.5	0.700836	4.84717	5.6846	5.09121	4.564	3.08521	12.7209	1.65393
		28	0.525068	4.79753	5.48895	5.29563	4.95431	3.1627	10.0199	2.16882
		28.5	0.942411	5.07097	4.95661	5.54172	5.19188	3.46667	4.62003	2.84963
		29	2.10213	5.70397	5.17867	6.04954	5.53699	4.11896	1.42978	2.85063
		29.5	3.64153	6.07841	6.08306	6.88131	7.08361	4.93209	0.420657	3.22861
		30	6.04793	6.26813	6.58014	7.28258	8.27609	5.11317	0.41751	4.18781
		30.5	8.72205	6.65638	6.73222	7.06498	7.79113	4.85584	-0.135413	4.80734
		31	11.1035	6.98046	6.64592	6.44237	7.08483	4.11166	-1.76657	5.24389
		31.5	12.737	6.33892	5.43877	5.35277	5.717	2.67796	-3.93435	6.08807
		32	13.0551	5.01784	3.3744	3.1961	2.69272	1.29678	-6.40914	6.47145
		32.5	11.6695	3.82769	0.98541	0.308438	-0.251865	-0.296574	-8.88369	6.00099
		33	9.26558	2.40521	-1.95555	-2.21874	-2.50913	-2.22465	-10.4277	4.8006
		33.5	6.21093	0.0882901	-5.22226	-4.46024	-4.65813	-3.90536	-10.2084	2.81117
		34	2.3033	-2.02662	-8.31538	-7.03414	-6.12295	-5.09405	-9.96258	0.216086
		34.5	-1.90189	-4.08854	-11.6887	-9.05072	-7.0406	-6.76789	-10.1438	-3.05594
		35	-6.10992	-7.20085	-15.7681	-10.3972	-8.64358	-8.52473	-10.2894	-7.12829
		35.5	-10.7497	-10.5049	-19.6719	-13.0422	-10.9492	-10.422	-10.8503	-10.9407
		36	-16.0482	-13.213	-23.7223	-16.4069	-14.3089	-13.3136	-12.8073	-15.0699
		36.5	-21.173	-16.4126	-28.4847	-19.5782	-18.2601	-16.9887	-14.9027	-19.8206
		37	-26.4924	-20.1185	-33.5547	-23.697	-22.6263	-21.0991	-16.6402	-24.4513
		37.5	-32.44	-23.4706	-38.495	-29.1991	-27.7952	-25.6439	-19.1439	-29.1413
		38	-38.4649	-27.4007	-44.4158	-34.5013	-32.8002	-30.4926	-22.1905	-34.343
		38.5	-44.2112	-32.416	-50.7629	-40.012	-37.2594	-35.1607	-25.0249	-39.4735
		39	-50.1782	-37.7849	-56.8565	-46.2208	-42.4384	-40.1491	-27.5283	-44.6321
		39.5	-55.5005	-42.5116	-63.0339	-51.9904	-47.613	-44.8046	-30.3341	-49.2968
		40	-59.359	-46.8257	-68.3595	-56.4496	-51.2259	-48.632	-32.6383	-52.8749
		40.5	-61.9788	-50.4705	-71.7657	-59.2909	-54.3033	-51.51	-33.9676	-55.5125
		41	-62.7463	-52.2765	-73.2936	-60.4049	-55.9907	-52.8196	-34.6607	-55.7903
		41.5	-60.8615	-51.8198	-72.2398	-59.313	-54.9625	-52.1085	-35.0463	-53.8099
		42	-57.3475	-49.4261	-68.276	-55.8715	-52.0145	-49.2174	-34.1577	-50.4343
		42.5	-52.3457	-45.3071	-62.4195	-50.5136	-47.2786	-44.4449	-32.2257	-45.0927
		43	-45.3123	-39.5141	-54.9228	-44.1748	-40.6894	-38.7022	-29.449	-38.2357
		43.5	-37.5612	-33.0666	-46.6142	-36.8923	-33.93	-32.2464	-25.8506	-31.975
		44	-30.1141	-26.1991	-38.2484	-29.1887	-27.385	-25.0068	-21.5612	-25.3599
		44.5	-22.6359	-19.3597	-29.8572	-22.153	-20.5173	-18.3092	-17.1247	-18.8656
		45	-15.7939	-13.156	-22.1097	-15.8329	-14.6384	-12.5032	-12.8619	-13.8649
		45.5	-10.372	-7.69384	-15.6721	-9.78838	-9.66441	-6.91909	-9.09273	-9.40192
		46	-5.80183	-2.35493	-9.95791	-4.65426	-4.64901	-2.35181	-5.61828	-4.79671
		46.5	-2.12203	2.15879	-5.29582	-0.563876	-0.178705	1.05682	-2.74898	-1.26892
		47	0.610074	4.97061	-1.97984	3.45522	3.4475	4.09308	-0.701441	1.92505
		47.5	3.23313	7.28954	1.02645	6.79094	6.90957	6.54331	1.33714	5.01404
		48	5.5388	9.36865	4.04387	9.145	9.88565	8.83668	2.92617	7.13461
		48.5	7.27099	10.7577	6.67587	11.4648	12.142	11.1442	3.71466	8.7064
		49	9.04698	11.8069	9.19595	13.6247	14.1618	12.9133	4.59917	9.96952
		49.5	11.0069	13.3091	11.2889	14.8175	15.5911	14.2355	5.98942	10.5443
		50	12.629	14.5755	12.7703	15.9157	16.3654	15.6703	6.78573	11.2493
		50.5	13.8814	15.5121	14.275	17.1389	17.427	16.1402	7.39056	12.2896
		51	14.9466	16.4178	15.2547	17.918	18.4591	16.0533	8.60111	12.7683
		51.5	15.9236	16.7352	15.7011	18.4013	18.9097	16.6078	9.74999	13.0857
		52	16.7124	16.877	16.9199	19.0603	19.4613	16.8415	10.0371	13.6959
		52.5	16.8345	17.3539	18.1727	19.9743	20.2215	16.5432	10.0123	13.8657
		53	17.4652	17.9268	18.4973	20.3256	20.3576	16.8816	10.0812	13.7268
		53.5	18.5069	17.8428	19.1789	20.5405	20.2796	17.6273	9.68475	14.0696
		54	18.9649	18.205	19.9715	21.2078	20.3669	17.4411	9.04939	14.8053
		54.5	19.4188	19.1006	19.8583	21.801	20.6761	17.5969	8.69705	15.4823
		55	20.2703	19.4127	19.759	21.5757	20.8487	18.1619	8.90886	16.092
		55.5	20.4781	19.6598	20.0866	21.6265	20.9541	18.4564	9.50575	16.5251
		56	20.7117	20.5633	20.7596	21.9484	21.3677	18.7494	9.96891	16.7366
		56.5	21.5608	21.1352	21.6335	22.049	21.8931	19.2899	10.0525	16.6563
		57	22.0808	20.6418	22.5371	22.6258	21.8242	19.7858	10.188	16.2008
		57.5	22.7401	20.386	23.2616	23.8144	22.0673	20.3896	10.4695	16.0969
		58	23.7496	20.1737	23.8843	24.9567	22.9686	20.9425	10.5	16.4871
		58.5	24.4728	19.3302	23.9615	25.8204	23.6395	21.0687	10.5323	16.8087
		59	25.0456	18.8656	23.7939	26.2863	24.6386	21.3719	10.9519	16.5938
		59.5	25.4992	19.4897	23.8041	25.951	26.0275	21.5627	11.4714	16.7148
		60	25.4549	20.0939	24.3021	25.8425	26.8275	21.2485	11.3867	17.0665
		60.5	25.0233	20.4841	25.0125	25.9169	27.0808	20.9033	10.7599	17.1325
		61	24.3667	21.2386	25.3457	25.6012	27.4456	20.8369	10.6437	16.9773
		61.5	23.2722	21.9208	25.8714	25.6686	27.4734	21.144	10.8315	17.6117
		62	22.4609	21.7032	26.8043	26.3743	27.4557	21.437	10.8316	18.1958
		62.5	22.3568	21.276	27.2345	26.2776	27.6233	21.5749	11.2874	17.9985
		63	22.4986	21.2666	27.4008	26.1189	27.7141	22.3961	12.2634	18.0273
		63.5	23.4152	21.219	28.6754	26.5804	27.0551	22.8748	12.7525	18.8536
		64	24.2048	20.9362	29.1092	26.3572	26.8315	22.7232	12.9399	18.8732
		64.5	28.2038	22.8277	33.0518	28.5675	27.5335	24.2194	14.1143	21.5555
		65	13.8611	10.6596	16.0761	13.271	11.9282	11.018	6.42119	10.6967
		Raw data from ThermoFluor assay on T203 binding with WILD-TYPE (Figure-5C)
		Temperature	0 µM	6.25 μM	12.5 µM	25 μM	50 µM	100 μM	200 µM	400 μM
		25	-0.23	0.82	0.77	0.23	-2.79	-4.42	1.5	-2.1
		25.5	-0.49	1.77	1.67	0.5	-6.04	-9.58	3.25	-4.56
		26	-0.45	1.64	1.54	0.46	-5.58	-8.84	3	-4.21
		26.5	-0.45	1.64	1.54	0.46	-5.58	-8.84	3	-4.21
		27	-0.45	1.64	1.54	0.46	-5.58	-8.84	3	-4.21
		27.5	-0.52	1.68	1.57	0.46	-5.5	-8.75	3.3	-4.05
		28	0.04	1.34	1.42	0.51	-5.98	-9.38	1.43	-5.13
		28.5	0.05	1.26	0.99	0.07	-6.84	-9.71	-2.22	-6.5
		29	-0.5	1.37	0.27	-0.95	-7.06	-9.91	-4.9	-7.02
		29.5	0.26	1.2	-0.3	-1.5	-7.01	-10.73	-7.45	-7.46
		30	1.2	0.64	-1.4	-2.57	-8.39	-11.25	-10.73	-8.51
		30.5	1.49	-0.23	-3.59	-5.02	-11.31	-12.76	-14.79	-10.61
		31	2.56	-1.39	-6.16	-8.02	-14.96	-15.75	-19.34	-13.66
		31.5	4.03	-3.13	-8.92	-11.07	-20.52	-19.81	-24.85	-18.41
		32	4.01	-5.25	-12.27	-15.55	-28.25	-25.59	-30.43	-25.33
		32.5	2.7	-8.02	-16.32	-21.78	-37.3	-34.69	-35.86	-34.61
		33	0.63	-11.95	-21.34	-29.65	-49.07	-47.54	-43.39	-47.55
		33.5	-3.25	-17.55	-28.83	-41.26	-67.09	-67.19	-56.22	-68.15
		34	-9.61	-25.69	-40.83	-59.68	-94.27	-98.1	-76.84	-98.88
		34.5	-18.1	-37.78	-59.88	-86.84	-134.09	-144.08	-108.73	-141.65
		35	-29.5	-55.36	-88.01	-125.38	-191.07	-208.33	-154.77	-198.59
		35.5	-45.48	-80.76	-128.3	-179.52	-266.85	-291.58	-213.9	-268.46
		36	-66.62	-114.92	-181.29	-247.69	-355.9	-386.5	-278.54	-341.06
		36.5	-93.64	-157.42	-244.9	-322.97	-447.36	-479.36	-339.75	-404.89
		37	-129.05	-207.95	-315.6	-398.63	-529.47	-556.18	-388.58	-451.2
		37.5	-174.38	-263.84	-386.47	-465.59	-587.86	-603.09	-414.88	-470.5
		38	-230.2	-319.09	-446.71	-509.64	-609.73	-609.35	-412.92	-457.45
		38.5	-294.65	-367.39	-487.62	-523.12	-592.26	-575.09	-385.78	-417.55
		39	-363.68	-404.04	-504.16	-507.87	-541.68	-511.08	-340.43	-361.04
		39.5	-429.76	-423.59	-492.9	-466.32	-466.24	-428.06	-283.91	-295.29
		40	-484	-422.83	-456.56	-403.32	-377.69	-337.64	-224.83	-228.89
		40.5	-518	-402.88	-402.4	-330.82	-288.38	-251.51	-169.33	-168.14
		41	-527.04	-368.16	-338.51	-258.71	-206.37	-176.07	-120.75	-116.31
		41.5	-509.88	-323.41	-271.97	-191.29	-135.66	-112.42	-80.01	-73.57
		42	-468.24	-272.87	-208.74	-131.98	-77.82	-60.89	-46.84	-39.54
		42.5	-407.93	-221.17	-151.98	-83.12	-32.71	-21.06	-20.51	-13.6
		43	-336.05	-171.55	-103.07	-43.82	1.16	8.57	-1.08	4.73
		43.5	-260.25	-125.95	-62.47	-13.06	25.72	29.65	13.05	17.41
		44	-187.37	-84.62	-29.19	10.63	43.1	44.47	22.88	26.71
		44.5	-123.06	-48.68	-2.54	28.36	55.19	54.69	29.05	33.12
		45	-70.13	-19.04	17.72	40.89	63.46	60.59	32.91	37.3
		45.5	-29.47	4.71	33.17	49.95	69.04	63.96	35.6	40.5
		46	0.06	23.46	44.66	56.36	72.83	66.25	36.78	43.31
		46.5	20.33	37.12	52.18	60.74	75.45	67.26	37.52	44.6
		47	33.23	46.53	57.22	64.03	76.99	66.88	38.38	45.09
		47.5	41.26	53.22	60.95	66.26	77.87	67.43	38.12	45.84
		48	46.4	57.1	63.02	67.43	77.88	68.77	37.01	45.79
		48.5	49.81	59.22	64.41	68.83	77.65	69.8	36.3	45.15
		49	52.6	61.09	66.05	69.78	77.82	70.75	35.84	45.41
		49.5	55.72	62.52	67.24	69.88	77.85	71.73	35.32	46.15
		50	59.16	63.29	68.24	70.26	77.96	72.06	35.46	46.12
		50.5	62.12	64.89	69.29	70.67	78.64	71.53	36.1	46.42
		51	63.97	66.65	70.02	70.13	78.88	70.51	36.88	46.88
		51.5	65.54	67.79	70.73	69.89	78.29	69.67	37.6	46.66
		52	67.18	68.89	71.19	70.21	77.99	69.52	37.91	45.71
		52.5	68.13	70.33	70.98	70.39	78	69.46	38.04	45.39
		53	68.86	71.39	70.66	70.58	78.12	69.9	38.54	45.46
		53.5	70.34	71.92	70.72	71.19	78.39	70.64	38.6	45.37
		54	71.63	72.32	70.41	71.29	78.81	71.11	38.26	45.45
		54.5	71.89	72.58	70.53	71.27	78.86	71.09	38.52	46.23
		55	72.32	72.43	71.48	71.43	78.71	71.14	38.78	47.36
		55.5	72.83	72.26	72.37	71.53	78.6	70.77	38.3	47.86
		56	73.02	72.95	72.86	71.59	78.84	70.88	38.09	48.53
		56.5	73.29	73.96	73.45	72.06	79.82	71.84	38	49.5
		57	74.13	74.99	73.5	72.64	81.31	72.53	37.49	49.54
		57.5	75.07	75.99	73.1	73.04	82.24	72.86	37.54	48.88
		58	76	76.21	72.9	73.11	82.59	73.3	38.34	48.77
		58.5	76.95	75.67	72.76	73.2	83.16	73.25	39.4	48.39
		59	77.68	75.06	73.2	73.59	83.33	72.68	40.94	48.49
		59.5	78.43	74.65	73.82	73.67	83.11	72.82	42.9	50.1
		60	79.09	75.15	74	73.69	83.3	73.22	44.96	51.54
		60.5	79.73	76.25	74.21	74.2	84.19	73.68	46.77	52.53
		61	80.54	77.22	74.84	74.7	85.01	74.32	48.17	54.04
		61.5	81.62	77.91	74.77	74.68	85.63	74.98	49.53	54.71
		62	82.67	77.96	74.75	74.71	86.55	75.74	51.08	54.56
		62.5	83.58	77.19	75.88	74.78	87.89	76.84	52.04	55.07
		63	84.51	76.37	76.52	74.54	88.64	78.16	53.3	56.32
		63.5	85.18	76.88	77.08	74.64	89.11	80.09	54.77	57.22
		64	85.54	76.85	77.93	74.87	89.91	81.39	55.39	58.07
		64.5	92.85	85.65	85.77	82.07	97.96	90.55	60.61	63.94
		65	42.89	40.91	40.07	38.46	45.38	42.84	28.19	29.76
		Raw data from ThermoFluor assay on T203 binding with R209E mutant (Figure-5C)
		Temperature	0 µM	6.25 μM	12.5 µM	25 μM	50 µM	100 μM	200 µM	400 μM
		25	0.286617	4.6816	1.84518	4.40674	1.54635	0.182411	-0.665629	0.212531
		25.5	0.621004	10.1435	3.99788	9.54795	3.35043	0.395224	-1.4422	0.460484
		26	0.573234	9.3632	3.69035	8.81349	3.09271	0.364822	-1.33126	0.425062
		26.5	0.573234	9.3632	3.69035	8.81349	3.09271	0.364822	-1.33126	0.425062
		27	0.573234	9.3632	3.69035	8.81349	3.09271	0.364822	-1.33126	0.425062
		27.5	0.594066	9.32165	3.72686	8.54717	3.12549	0.298294	-1.32619	0.396692
		28	0.431178	9.65048	3.53099	10.1548	2.83619	0.707792	-1.44909	0.535401
		28.5	0.361675	9.57422	2.8241	13.576	2.96097	1.49493	-0.96802	1.04324
		29	0.687921	9.96954	2.66354	16.8988	3.78707	2.24112	0.197561	2.16053
		29.5	1.77615	10.7422	3.02068	17.7305	4.69183	3.21227	1.56784	3.04563
		30	2.4882	10.9509	3.39598	15.18	5.24585	4.22026	2.45064	4.0088
		30.5	3.09181	10.7229	3.8099	11.8903	4.89523	4.3822	3.25625	5.43602
		31	4.54294	10.0736	3.93075	8.48867	3.7692	3.59014	4.27255	6.60821
		31.5	5.58336	8.72503	3.27115	4.43286	2.4198	2.76472	4.49823	6.84339
		32	5.9254	6.59116	1.75453	1.40102	0.779133	1.57327	3.99873	6.76802
		32.5	5.86432	4.55501	0.215297	0.161615	-1.86358	-0.401157	3.5447	6.3362
		33	5.1518	2.3865	-1.55912	-1.26744	-3.79504	-2.31756	2.56517	4.63723
		33.5	3.05584	0.0296102	-3.96219	-2.92643	-4.59605	-3.75434	0.771994	2.41561
		34	0.256026	-1.99088	-6.27209	-4.81706	-6.14986	-5.55946	-0.908293	0.351259
		34.5	-3.5432	-3.9959	-8.47339	-7.21434	-8.29428	-7.93541	-3.05519	-2.26451
		35	-8.34526	-6.66353	-11.7548	-9.7595	-9.15877	-10.1369	-5.7627	-5.62055
		35.5	-13.5098	-9.58977	-15.5017	-12.2804	-10.7327	-12.529	-8.61224	-8.62661
		36	-18.9303	-12.7456	-18.922	-15.6526	-14.1573	-16.1146	-12.178	-11.9937
		36.5	-24.7948	-16.8851	-22.8493	-19.5532	-17.5088	-20.2803	-16.3238	-16.3314
		37	-30.5646	-21.7208	-27.3358	-23.6538	-21.1116	-24.3694	-20.2324	-20.8519
		37.5	-36.2135	-26.7647	-31.9478	-29.2244	-26.21	-29.296	-24.3977	-25.3198
		38	-41.8878	-31.8	-37.112	-35.5678	-31.5739	-34.8554	-28.9062	-30.5011
		38.5	-47.507	-37.0307	-42.8254	-41.1891	-36.1457	-40.2691	-33.162	-35.6326
		39	-52.7272	-42.4632	-48.8715	-47.0371	-41.4123	-46.1757	-37.8748	-40.304
		39.5	-56.9499	-47.1036	-55.3663	-53.0536	-46.4514	-52.3931	-42.9488	-44.9046
		40	-59.7626	-50.3676	-61.1884	-57.3497	-50.368	-57.6927	-47.6633	-49.0663
		40.5	-60.7009	-52.7029	-65.8074	-60.5382	-53.6985	-61.6699	-51.8588	-51.7903
		41	-59.5512	-53.6342	-68.7531	-63.2931	-56.4299	-64.0721	-54.9031	-53.0391
		41.5	-56.2146	-52.0706	-69.1391	-63.2229	-56.9269	-63.9779	-55.3614	-52.8586
		42	-51.0042	-48.6513	-66.7323	-60.4264	-55.2039	-61.3946	-53.607	-50.4707
		42.5	-44.4989	-44.1547	-61.5399	-56.1971	-51.6638	-56.6188	-50.013	-45.9543
		43	-37.7439	-38.2209	-54.3203	-49.81	-46.1735	-50.604	-44.269	-40.5384
		43.5	-30.4757	-31.1316	-46.0816	-41.4814	-39.3945	-43.7774	-37.6727	-34.5185
		44	-23.2469	-23.9218	-37.3026	-33.2183	-31.9246	-36.4365	-31.1086	-27.6186
		44.5	-17.162	-16.9562	-28.4071	-25.4593	-24.5371	-29.1244	-24.3305	-20.9469
		45	-11.9297	-10.4703	-20.5904	-18.168	-18.0864	-22.3938	-17.9986	-15.2027
		45.5	-6.96758	-4.87258	-14.0084	-11.8497	-12.2991	-15.9105	-12.9495	-10.0907
		46	-2.8422	-0.319588	-8.45439	-6.66212	-6.83829	-9.88628	-8.32488	-5.4664
		46.5	0.39756	3.56406	-3.61784	-2.73929	-2.71702	-4.56731	-4.35781	-1.95464
		47	3.50122	6.67597	0.0863471	0.910594	0.454541	-0.239774	-1.93257	0.712169
		47.5	6.37668	9.02315	2.78771	4.31142	3.59226	2.90767	-0.163938	3.1131
		48	8.44301	10.8479	5.88716	6.66892	6.06372	5.51145	1.78184	5.55687
		48.5	10.176	12.5079	8.84957	8.65431	7.90069	7.62896	3.09026	7.35599
		49	12.0375	14.1208	10.4829	10.795	9.78933	8.76594	3.59395	8.93859
		49.5	13.4227	15.6387	12.1117	11.933	11.1944	9.81031	4.88622	10.6077
		50	14.3095	17.3012	14.0066	12.6567	12.1531	11.2678	6.63622	11.6526
		50.5	15.5101	19.1161	14.5443	13.9634	13.1376	11.9363	7.73831	12.2906
		51	15.9944	20.677	14.9929	14.7873	14.1351	12.4666	9.19947	13.0822
		51.5	15.5735	21.4536	16.1744	15.6698	14.8702	13.489	10.9935	13.7405
		52	15.4551	21.7939	17.0102	17.1826	15.5467	14.1353	12.2674	14.2008
		52.5	15.4734	22.1065	17.3819	18.0179	16.2413	14.3273	12.8705	15.0437
		53	15.3676	22.1658	18.2621	18.2468	17.1639	14.902	13.5325	15.7459
		53.5	16.0464	22.3505	18.8836	18.9022	17.81	15.4111	13.947	16.3122
		54	17.4597	22.7828	18.9642	19.2008	18.2643	15.5204	14.5069	16.8916
		54.5	18.7104	23.6711	19.1284	19.0728	19.1942	15.9213	15.0207	17.0608
		55	19.836	24.4149	19.6595	19.5942	19.9873	16.6413	15.4303	16.9283
		55.5	20.8505	24.824	20.3541	20.087	20.1518	17.1683	16.1375	17.1833
		56	21.3756	25.3842	20.8992	20.4752	20.2438	17.4187	16.9528	17.3019
		56.5	21.2777	25.9916	21.4968	20.9433	20.5015	17.697	17.3472	17.1793
		57	21.1877	26.1824	22.2561	21.0555	20.3807	17.6659	17.384	17.6879
		57.5	21.3875	26.5583	22.735	21.0193	20.3327	17.2521	17.8623	18.3157
		58	21.7082	27.5207	22.9258	21.4704	20.3029	17.1516	18.0446	18.3217
		58.5	22.2514	28.0116	23.2486	21.8273	20.4689	17.505	17.761	18.4599
		59	22.8283	28.6423	23.4078	22.025	20.9017	18.1312	17.9423	18.7106
		59.5	23.4921	29.7369	23.2805	22.6285	21.5551	19.0017	18.7614	18.5167
		60	24.1423	30.0951	23.2955	23.0245	22.0825	19.7917	19.1903	18.7335
		60.5	24.1536	29.8611	23.2168	23.077	22.7104	20.1649	19.469	19.0539
		61	24.1122	29.8775	22.8462	22.7805	23.4036	20.0991	20.0307	18.9279
		61.5	24.5941	29.7074	23.0332	22.4337	23.8294	19.9973	20.4417	19.1435
		62	24.616	29.1909	23.325	22.1863	23.9783	19.8876	20.3193	19.3608
		62.5	24.1348	29.4506	23.0873	21.9645	24.152	19.6981	20.358	18.8069
		63	24.0325	30.5331	23.1568	21.9389	24.4496	20.2698	20.7279	18.4871
		63.5	23.7334	31.0672	23.4777	22.0682	24.3838	20.1339	20.8729	18.9514
		64	23.2239	31.6358	23.2071	22.298	24.4337	20.0811	20.9749	18.6864
		64.5	24.6308	34.3054	24.9344	24.0611	26.337	20.1892	22.8377	20.9719
		65	11.2377	15.5761	11.5226	11.0549	12.0844	8.46529	10.5586	10.2155
